# Supplementary material for: Krishnolides A–D: New 2-Ketokhayanolides from the Krishna Mangrove, Xylocarpus moluccensis
Source: PubMed Central journal article supplement (PMC5706023; doi:10.3390/md15110333), 2017-10-27
Supplement: marinedrugs-15-00333-s001.pdf [file marinedrugs-15-00333-s001.pdf]

# Supporting Information

Copies of HR-ESIMS, and 1D, 2D NMR spectra of  
Krishnolides A-D (1-4).

## Table of Contents:

|                                                                                                            |         |
|------------------------------------------------------------------------------------------------------------|---------|
| 1. Positive HR-ESIMS for Krishnolide A (1) .....                                                           | S4      |
| 2. UV spectrum of Krishnolide A (1) in MeCN.....                                                           | S5      |
| 3. Experimental ECD spectrum of Krishnolide A (1) .....                                                    | S6      |
| 4. <sup>1</sup> H NMR (400 MHz) spectrum of Krishnolide A (1) in CDCl <sub>3</sub> .....                   | S7-S10  |
| 5. <sup>13</sup> C NMR (100 MHz) spectrum of Krishnolide A (1) in CDCl <sub>3</sub> .....                  | S11-S15 |
| 6. DEPT 135 spectrum of Krishnolide A (1) in CDCl <sub>3</sub> .....                                       | S16-S19 |
| 7. <sup>1</sup> H- <sup>1</sup> H COSY spectrum of Krishnolide A (1) in CDCl <sub>3</sub> .....            | S20-S24 |
| 8. HSQC spectrum of Krishnolide A (1) in CDCl <sub>3</sub> .....                                           | S25-S29 |
| 9. HMBC spectrum of Krishnolide A (1) in CDCl <sub>3</sub> .....                                           | S30-S35 |
| 10. NOESY spectrum of Krishnolide A (1) in CDCl <sub>3</sub> .....                                         | S36-S40 |
| 11. <sup>1</sup> H NMR (400 MHz) spectrum of Krishnolide A (1) in DMSO- <i>d</i> <sub>6</sub> .....        | S41-S44 |
| 12. <sup>13</sup> C NMR (100 MHz) spectrum of Krishnolide A (1) in DMSO- <i>d</i> <sub>6</sub> .....       | S45-S49 |
| 13. DEPT 135 spectrum of Krishnolide A (1) in DMSO- <i>d</i> <sub>6</sub> .....                            | S50-S53 |
| 14. <sup>1</sup> H- <sup>1</sup> H COSY spectrum of Krishnolide A (1) in DMSO- <i>d</i> <sub>6</sub> ..... | S54-S58 |
| 15. HSQC spectrum of Krishnolide A (1) in DMSO- <i>d</i> <sub>6</sub> .....                                | S59-S65 |
| 16. HMBC spectrum of Krishnolide A (1) in DMSO- <i>d</i> <sub>6</sub> .....                                | S66-S72 |
| 17. NOESY spectrum of Krishnolide A (1) in DMSO- <i>d</i> <sub>6</sub> .....                               | S73-S78 |
| 18. Positive HR-ESIMS for Krishnolide B (2) .....                                                          | S79     |
| 19. UV spectrum of Krishnolide B (2) in MeCN.....                                                          | S80     |
| 20. <sup>1</sup> H NMR (400 MHz) spectrum of Krishnolide B (2) in CDCl <sub>3</sub> .....                  | S81-S84 |
| 21. <sup>13</sup> C NMR (100 MHz) spectrum of Krishnolide B (2) in CDCl <sub>3</sub> .....                 | S85-S89 |
| 22. DEPT 135 spectrum of Krishnolide B (2) in CDCl <sub>3</sub> .....                                      | S90-S92 |

|                                                                                                      |           |
|------------------------------------------------------------------------------------------------------|-----------|
| 22. $^1\text{H}$ - $^1\text{H}$ COSY spectrum of Krishnolide B ( <b>2</b> ) in $\text{CDCl}_3$ ..... | S93-S97   |
| 23. HSQC spectrum of Krishnolide B ( <b>2</b> ) in $\text{CDCl}_3$ .....                             | S98-S103  |
| 24. HMBC spectrum of Krishnolide B ( <b>2</b> ) in $\text{CDCl}_3$ .....                             | S104-S113 |
| 25. NOESY spectrum of Krishnolide B ( <b>2</b> ) in $\text{CDCl}_3$ .....                            | S114-S118 |
| 26. Positive HR-ESIMS for Krishnolide C ( <b>3</b> ) .....                                           | S119      |
| 27. UV spectrum of Krishnolide C ( <b>3</b> ) in MeCN.....                                           | S120      |
| 28. $^1\text{H}$ NMR (400 MHz) spectrum of Krishnolide C ( <b>3</b> ) in $\text{CDCl}_3$ .....       | S121-S124 |
| 29. $^{13}\text{C}$ NMR (100 MHz) spectrum of Krishnolide C ( <b>3</b> ) in $\text{CDCl}_3$ .....    | S125-S128 |
| 30. DEPT 135 spectrum of Krishnolide C ( <b>3</b> ) in $\text{CDCl}_3$ .....                         | S129-S131 |
| 31. $^1\text{H}$ - $^1\text{H}$ COSY spectrum of Krishnolide C ( <b>3</b> ) in $\text{CDCl}_3$ ..... | S132-S136 |
| 32. HSQC spectrum of Krishnolide C ( <b>3</b> ) in $\text{CDCl}_3$ .....                             | S137-S141 |
| 33. HMBC spectrum of Krishnolide C ( <b>3</b> ) in $\text{CDCl}_3$ .....                             | S142-S150 |
| 34. NOESY spectrum of Krishnolide C ( <b>3</b> ) in $\text{CDCl}_3$ .....                            | S151-S156 |
| 35. Positive HR-ESIMS for Krishnolide D ( <b>4</b> ) .....                                           | S157      |
| 36. UV spectrum of Krishnolide D ( <b>4</b> ) in MeCN.....                                           | S158      |
| 37. $^1\text{H}$ NMR (400 MHz) spectrum of Krishnolide D ( <b>4</b> ) in $\text{CDCl}_3$ .....       | S159-S162 |
| 38. $^{13}\text{C}$ NMR (100 MHz) spectrum of Krishnolide D ( <b>4</b> ) in $\text{CDCl}_3$ .....    | S163-S167 |
| 39. DEPT 135 spectrum of Krishnolide D ( <b>4</b> ) in $\text{CDCl}_3$ .....                         | S168-S171 |
| 40. $^1\text{H}$ - $^1\text{H}$ COSY spectrum of Krishnolide D ( <b>4</b> ) in $\text{CDCl}_3$ ..... | S172-S176 |
| 41. HSQC spectrum of Krishnolide D ( <b>4</b> ) in $\text{CDCl}_3$ .....                             | S177-S182 |
| 42. HMBC spectrum of Krishnolide D ( <b>4</b> ) in $\text{CDCl}_3$ .....                             | S183-S191 |
| 43. NOESY spectrum of Krishnolide D ( <b>4</b> ) in $\text{CDCl}_3$ .....                            | S192-S197 |
| 44. Figure S1. ORTEP illustration of the X-ray structure of Krishnolide A ( <b>1</b> ) .....         | S198      |

# HR-ESIMS of Krishnolide A (1)

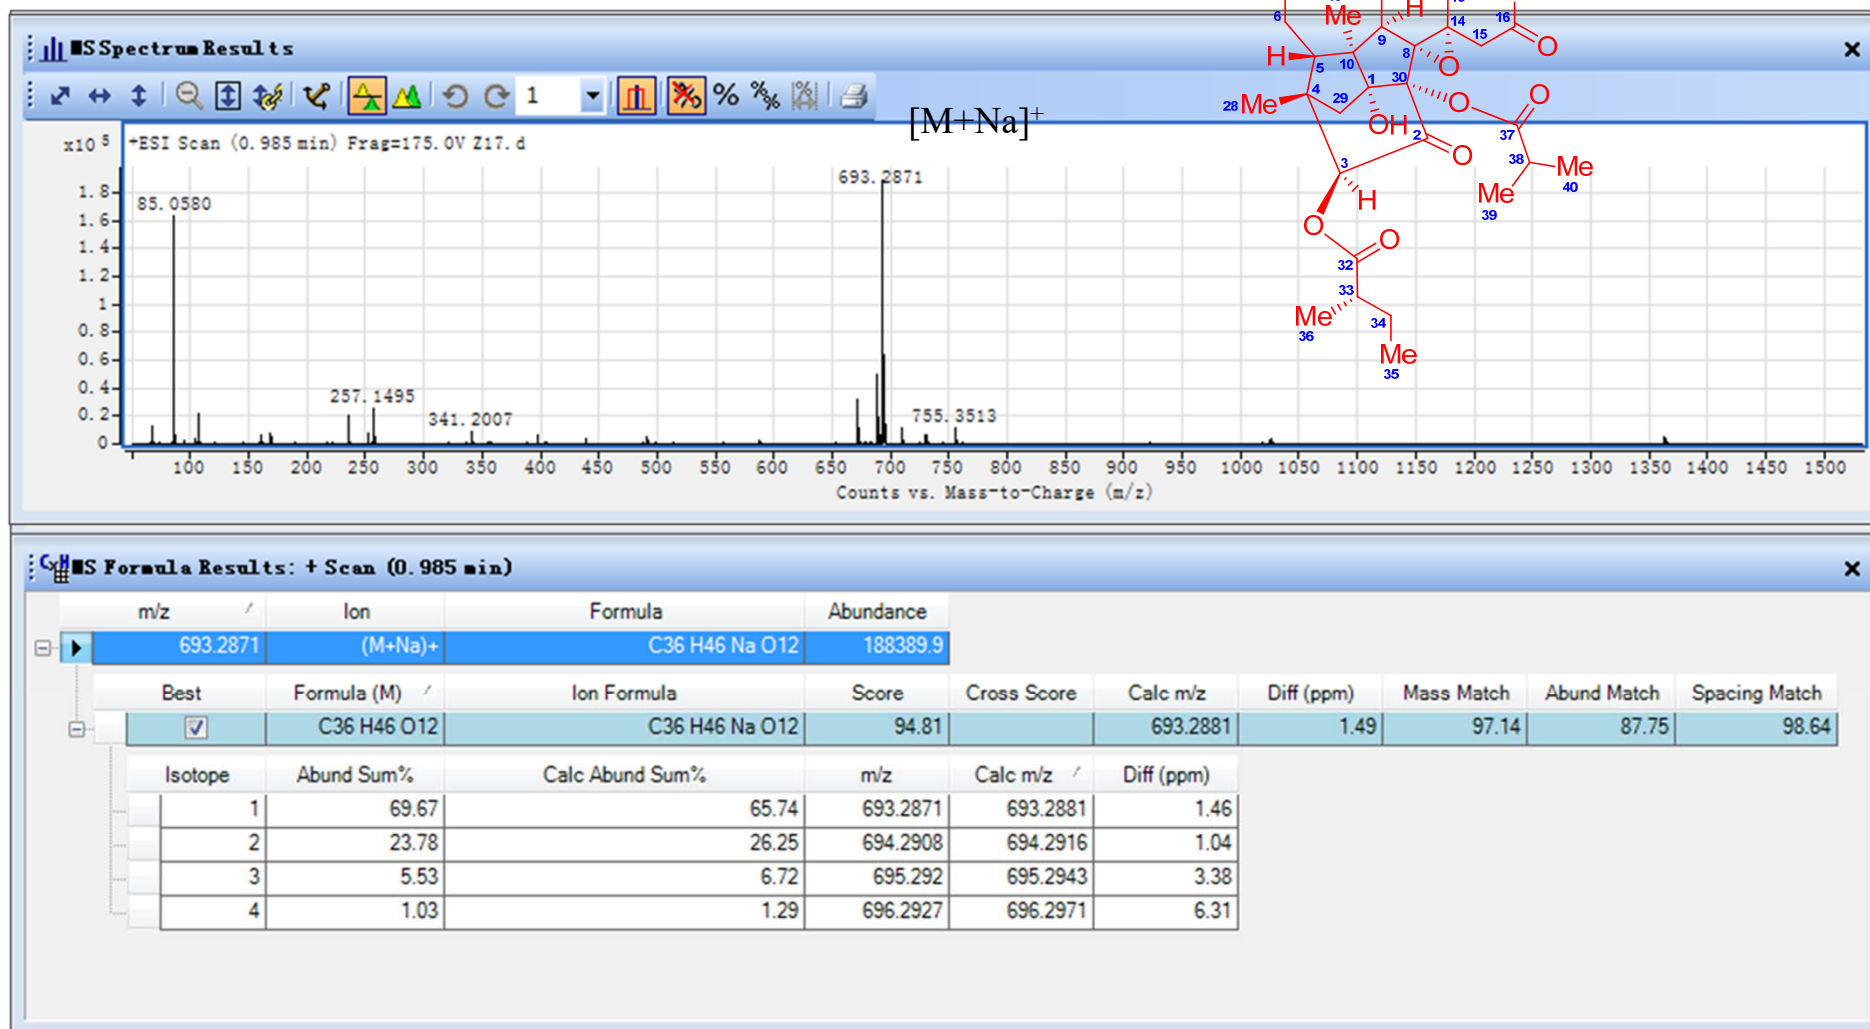

# UV spectrum of Krishnolide A (1) in MeCN

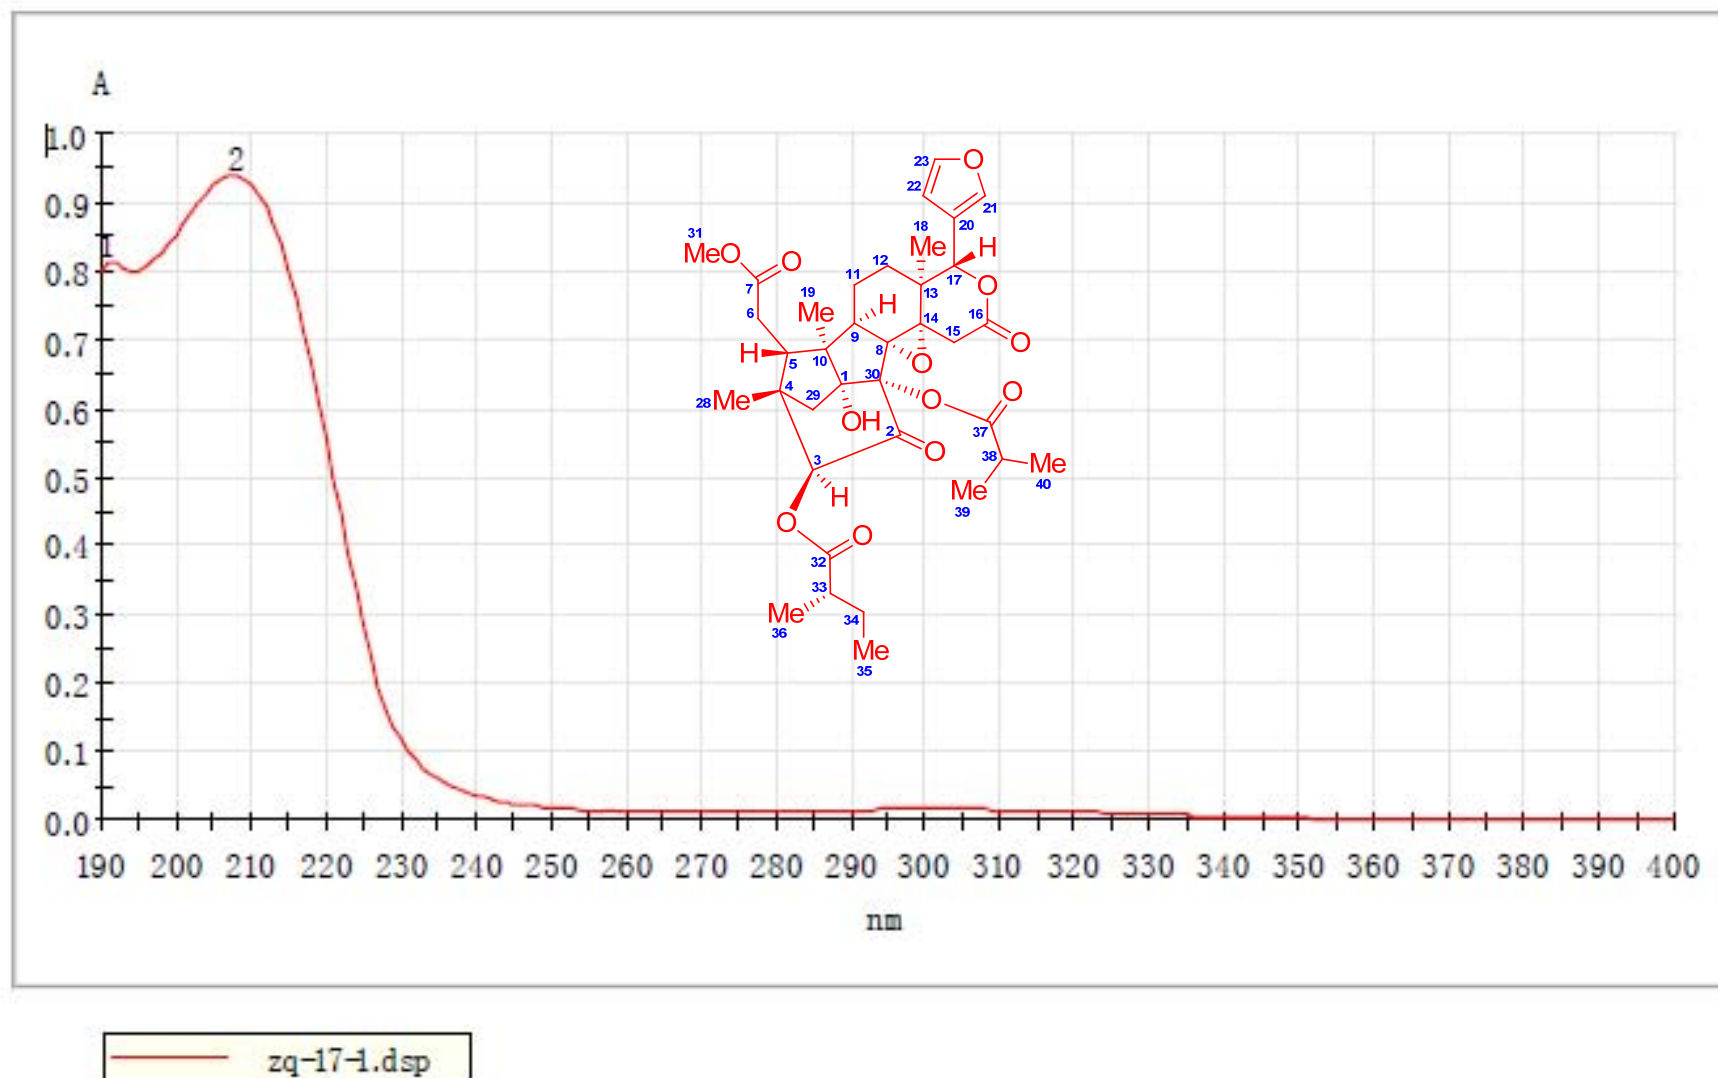

Experimental ECD spectrum of Krishnolide A (**1**) (recorded in MeCN at 250  $\mu\text{g/mL}$ )

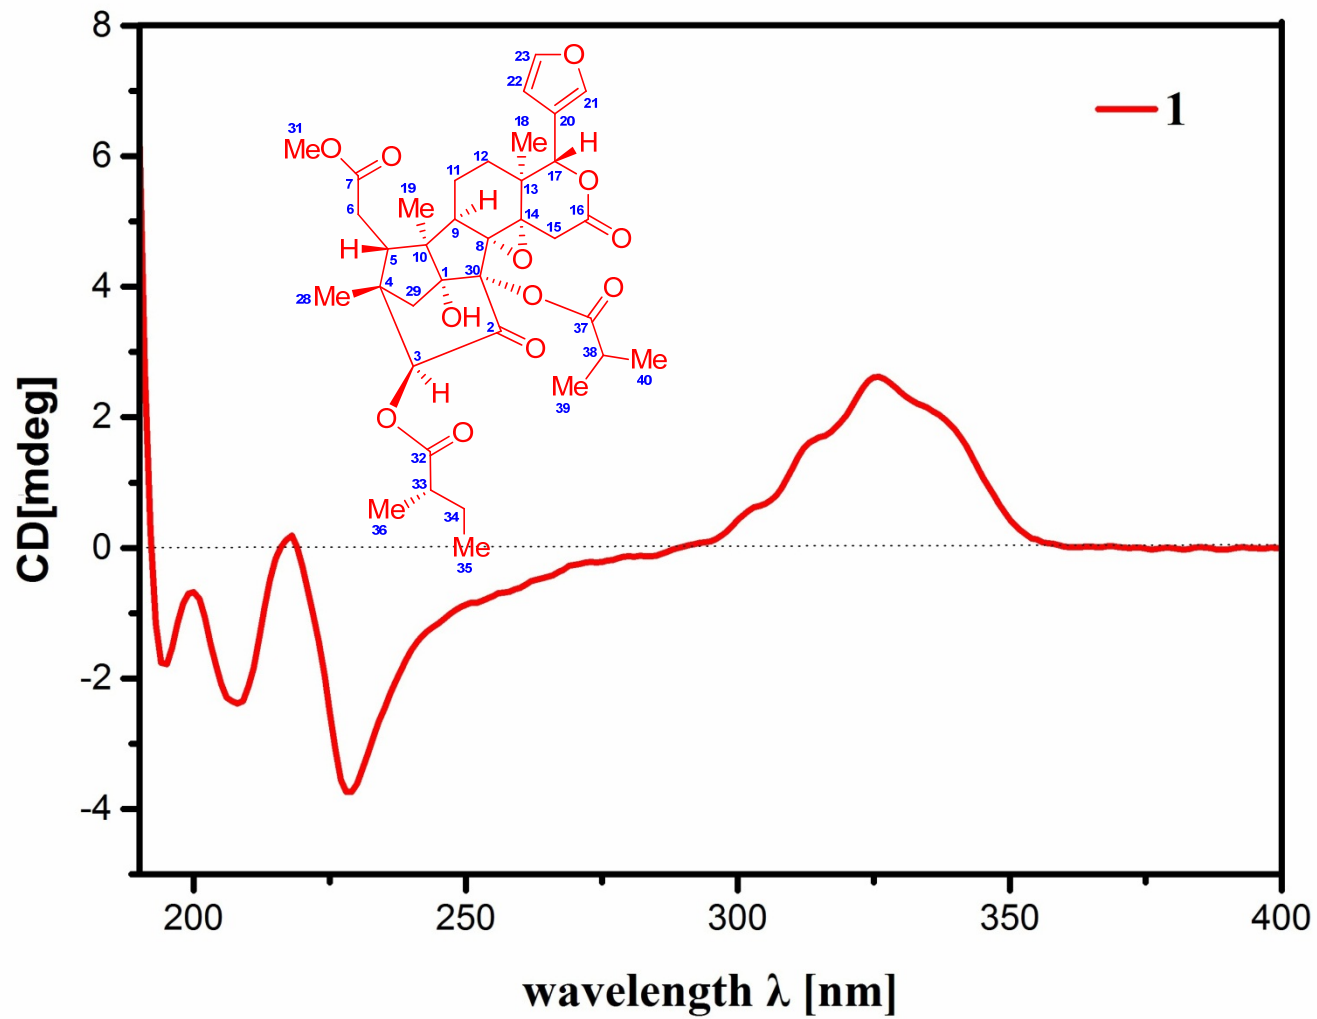

<sup>1</sup>H NMR (400 MHz) spectrum of Krishnolide A (1) in CDCl<sub>3</sub>

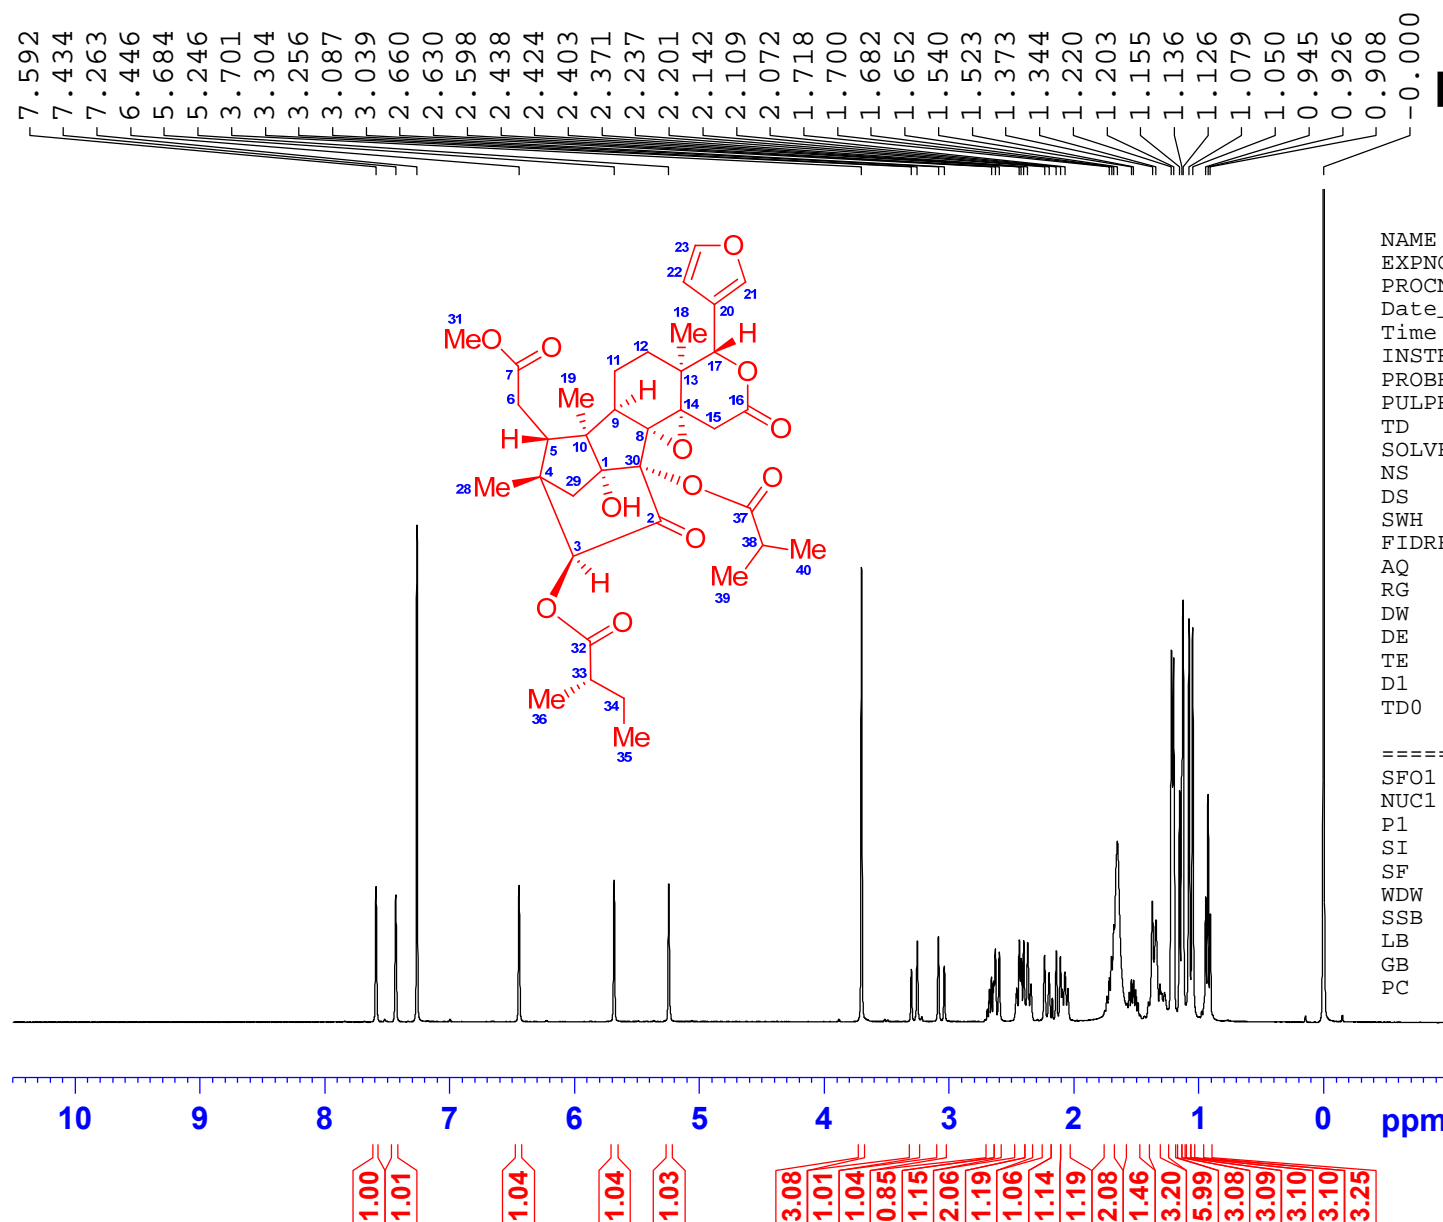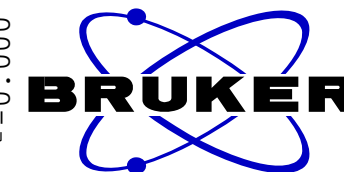

```

NAME                zq-17
EXPNO                1
PROCNO              1
Date_               20170116
Time                17.16
INSTRUM             spect
PROBHD              5 mm CPPBBO BB
PULPROG             zg30
TD                  65536
SOLVENT             CDC13
NS                  16
DS                  2
SWH                 8223.685 Hz
FIDRES              0.125483 Hz
AQ                  3.9846387 sec
RG                  208.5
DW                  60.800 usec
DE                  10.00 usec
TE                  297.0 K
D1                  1.00000000 sec
TD0                 1

===== CHANNEL f1 =====
SFO1                 400.1324710 MHz
NUC1                  1H
P1                   11.50 usec
SI                   65536
SF                   400.1300080 MHz
WDW                   EM
SSB                    0
LB                   0.30 Hz
GB                    0
PC                    1.00
    
```

<sup>1</sup>H NMR (400 MHz) spectrum of Krishnolide A (**1**) in CDCl<sub>3</sub>

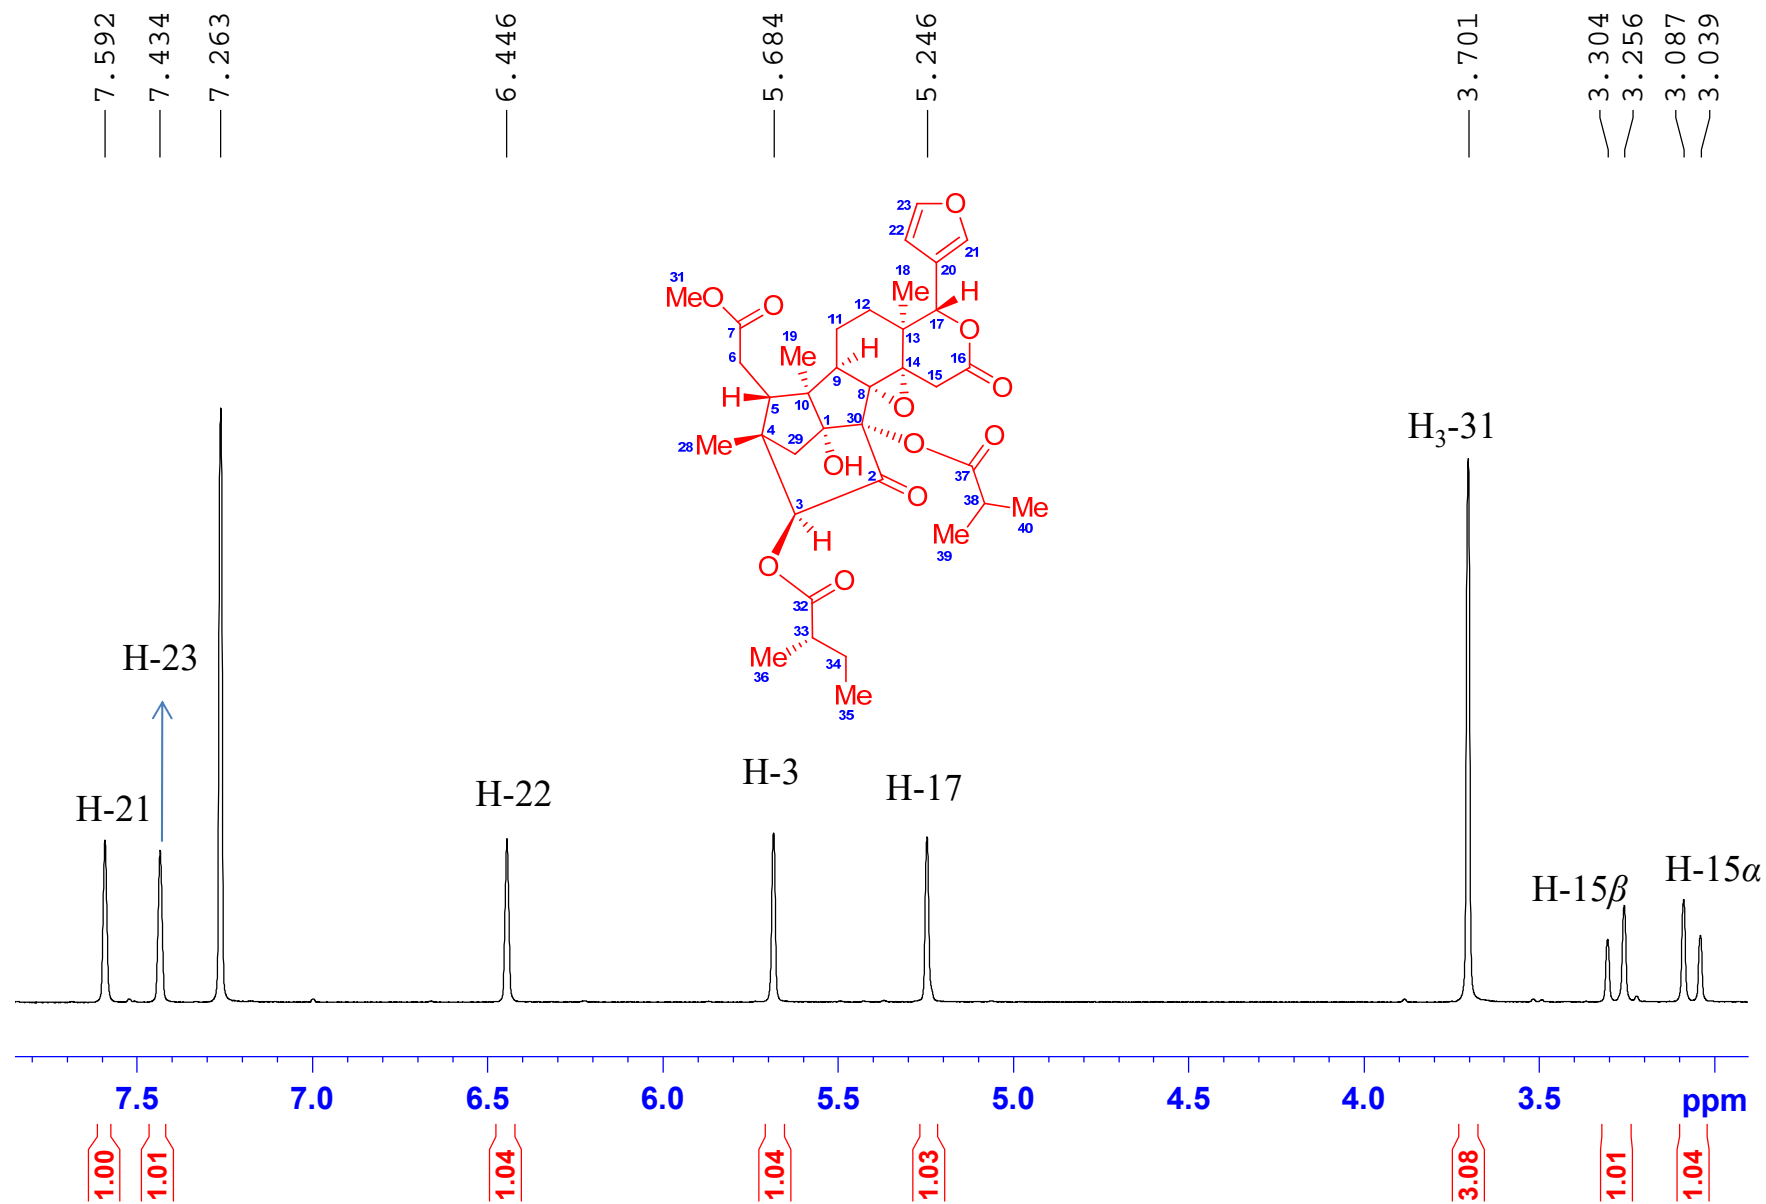



$^1\text{H}$  NMR (400 MHz) spectrum of Krishnolide A (**1**) in  $\text{CDCl}_3$

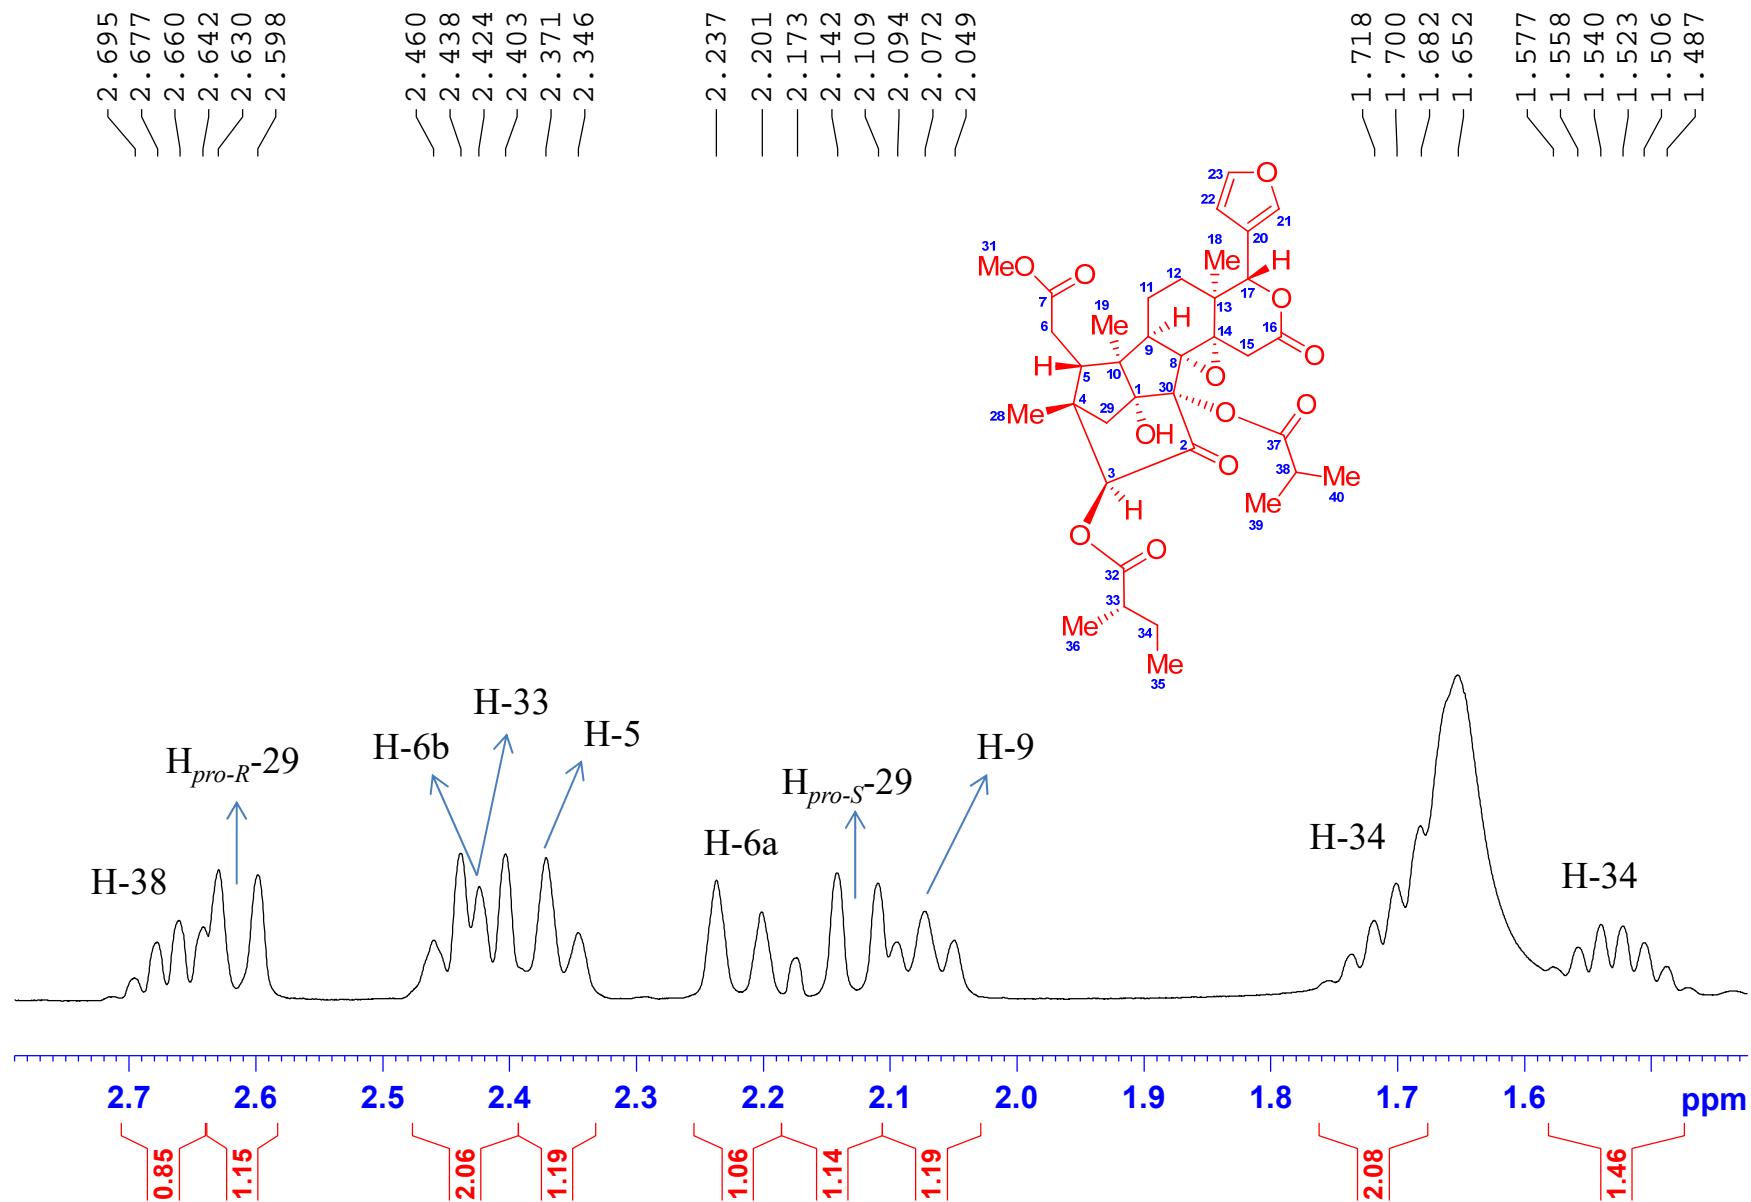

$^1\text{H}$  NMR (400 MHz) spectrum of Krishnolide A (**1**) in  $\text{CDCl}_3$

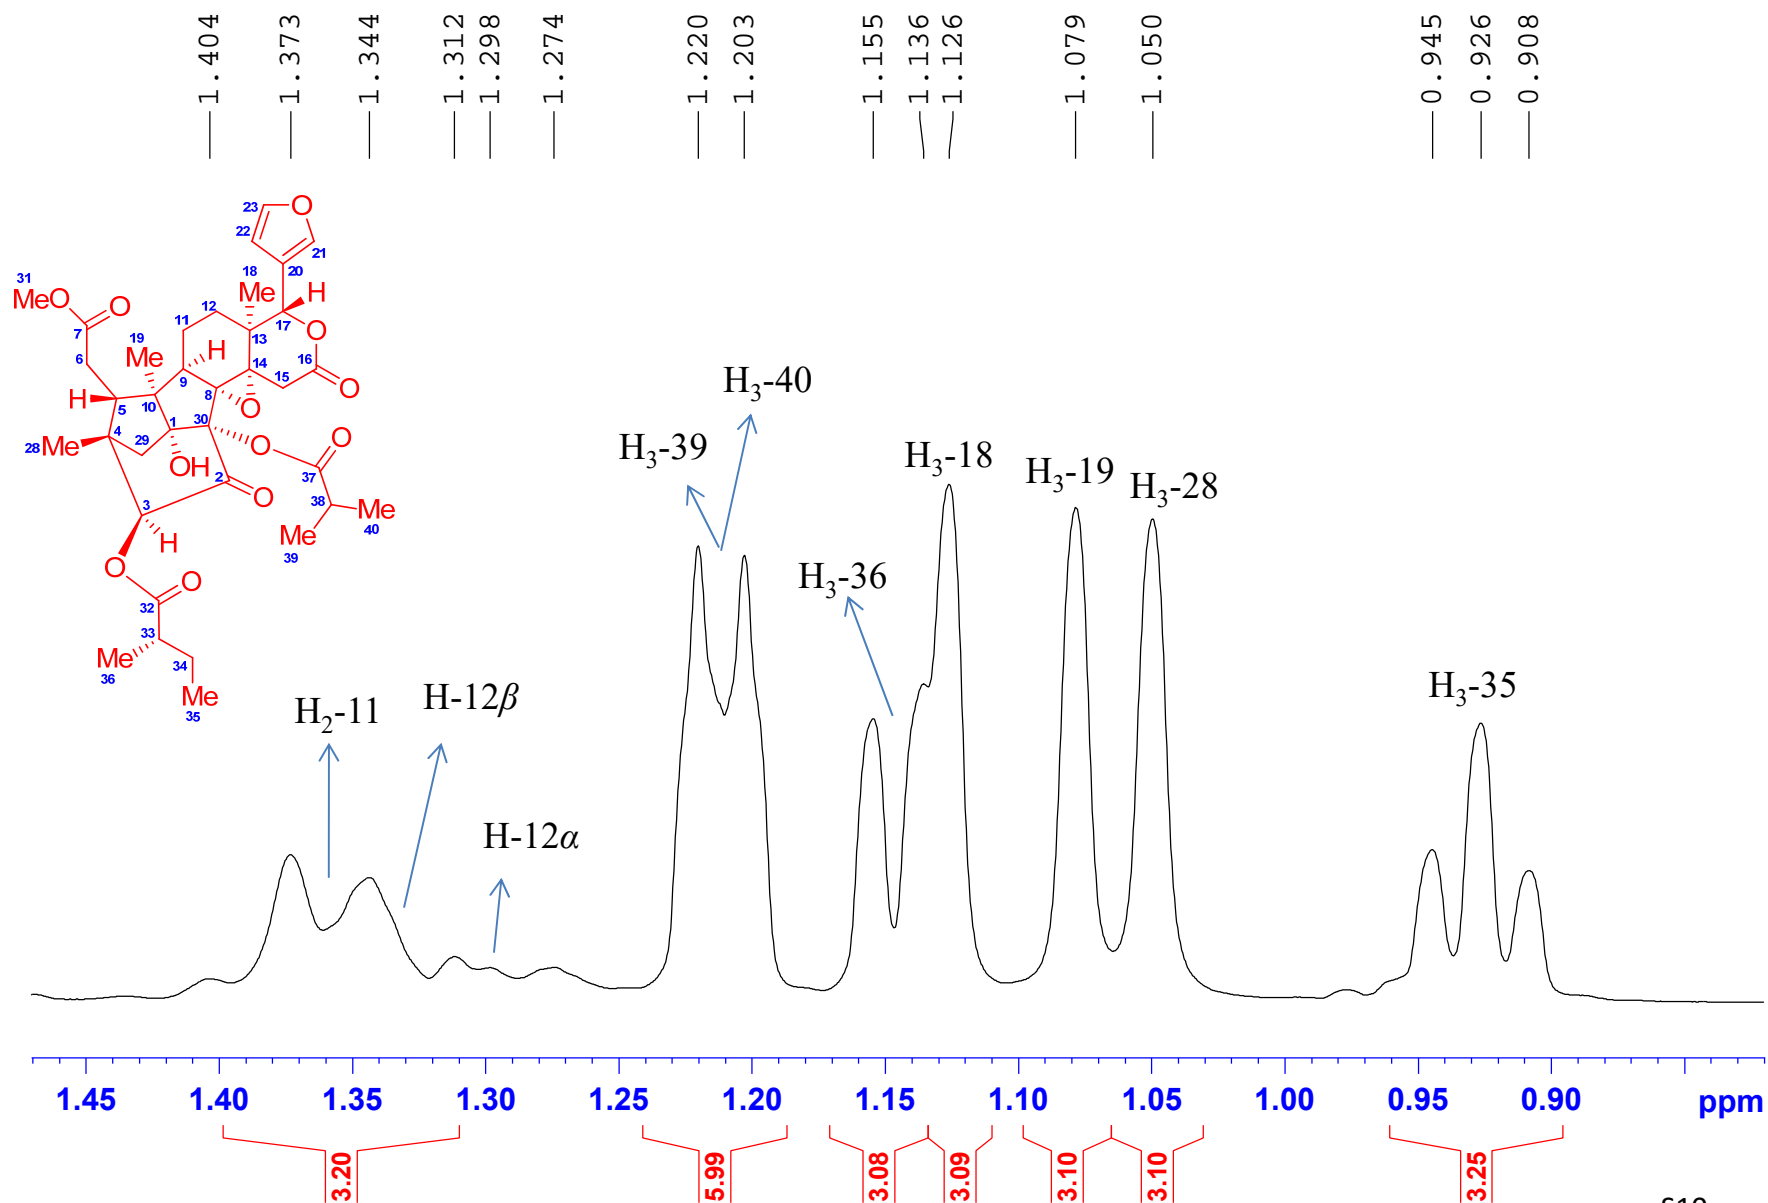

$^{13}\text{C}$  NMR (100 MHz) spectrum of Krishnolide A (1) in  $\text{CDCl}_3$

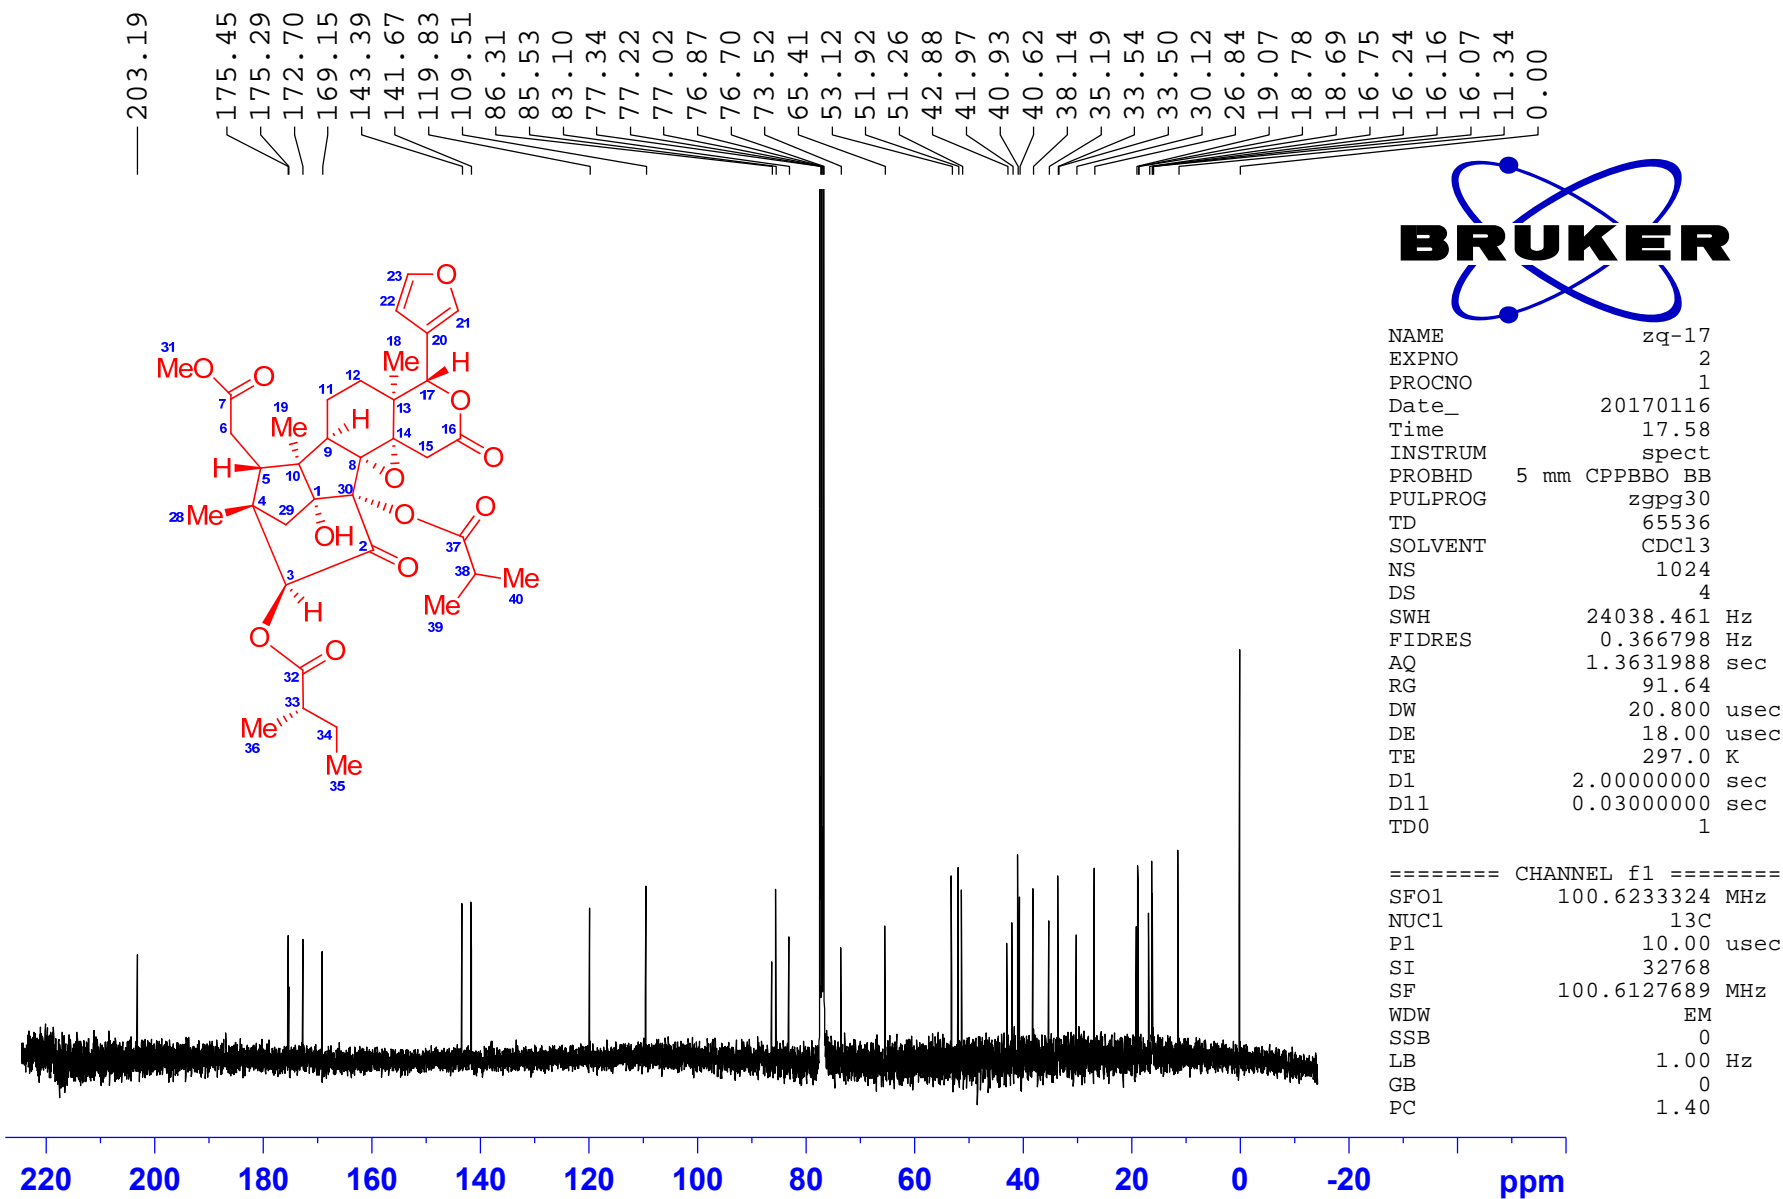

$^{13}\text{C}$  NMR (100 MHz) spectrum of Krishnolide A (**1**) in  $\text{CDCl}_3$

— 203.19

175.45  
175.29  
172.70  
— 169.15

— 143.39  
— 141.67

— 119.83

— 109.51

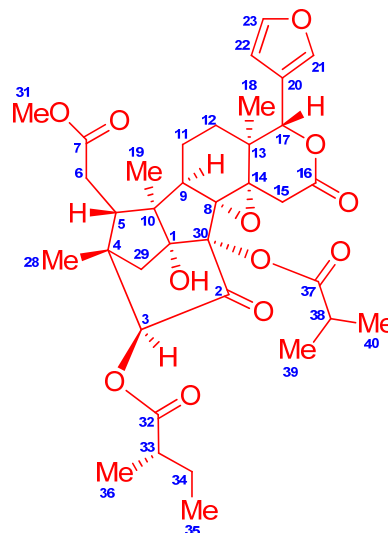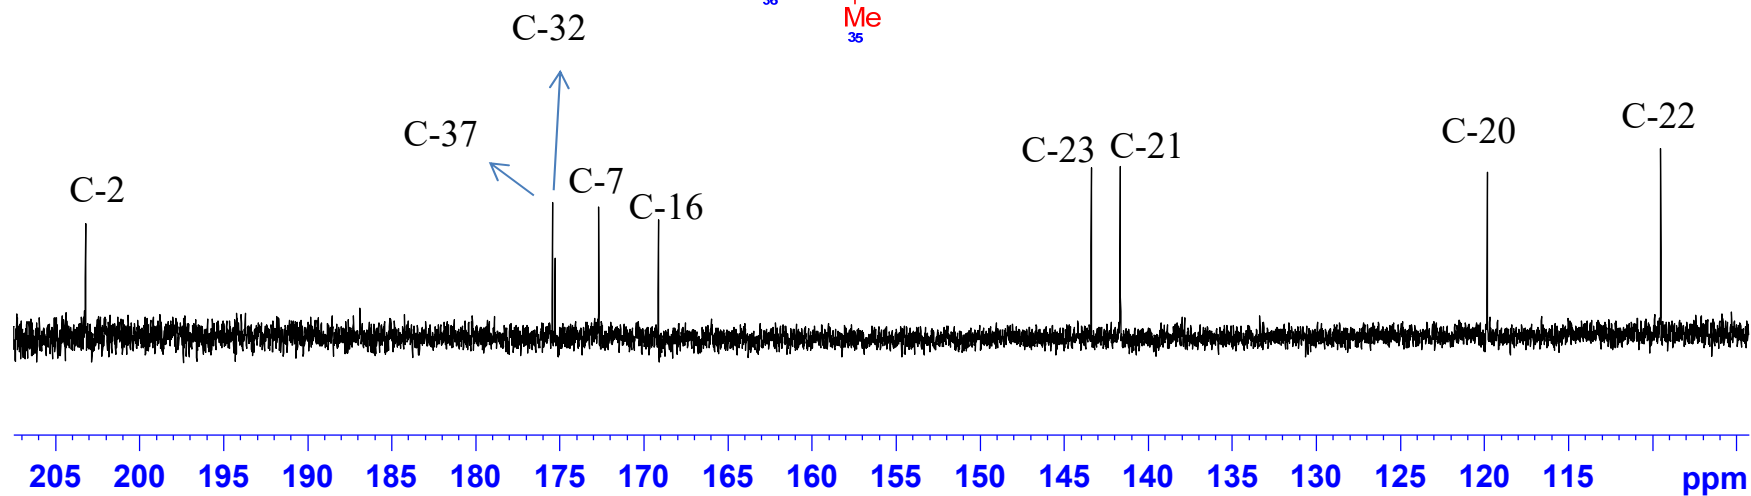

$^{13}\text{C}$  NMR (100 MHz) spectrum of Krishnolide A (**1**) in  $\text{CDCl}_3$

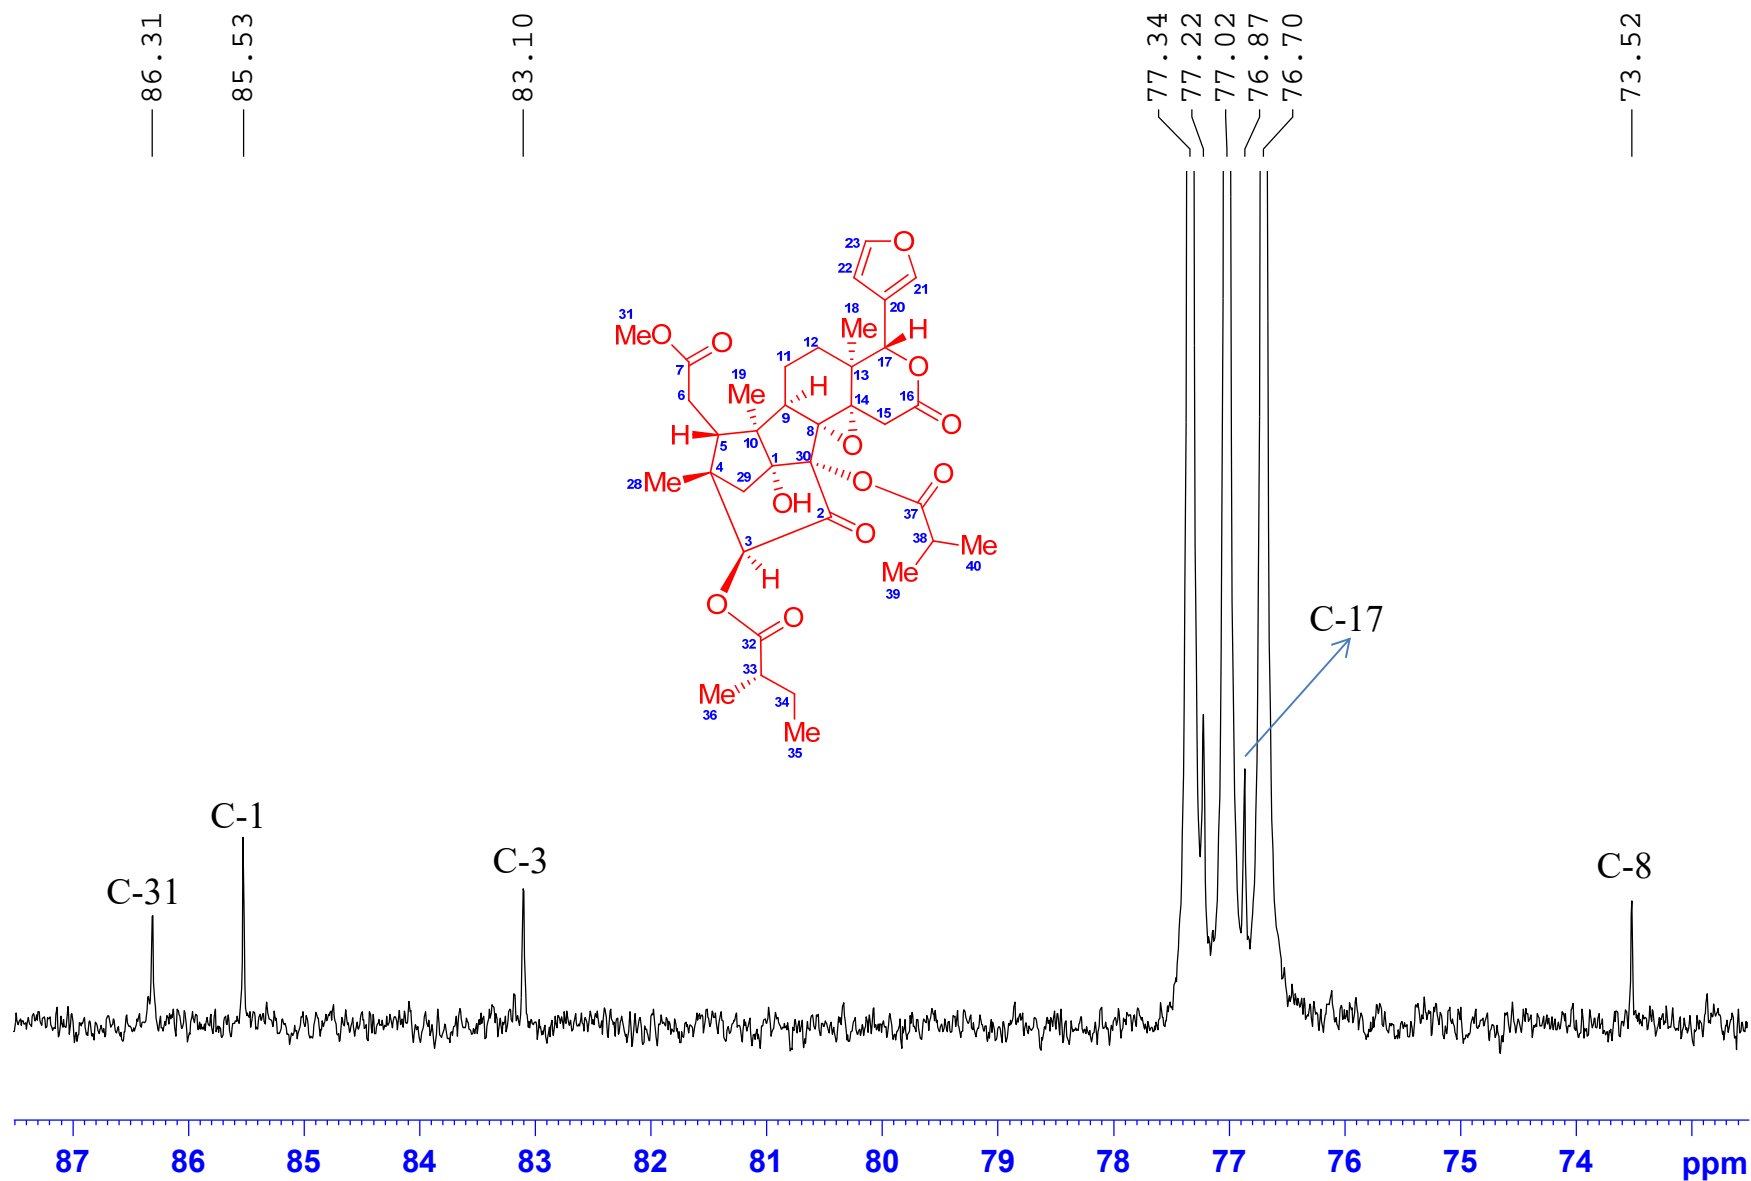

$^{13}\text{C}$  NMR (100 MHz) spectrum of Krishnolide A (**1**) in  $\text{CDCl}_3$

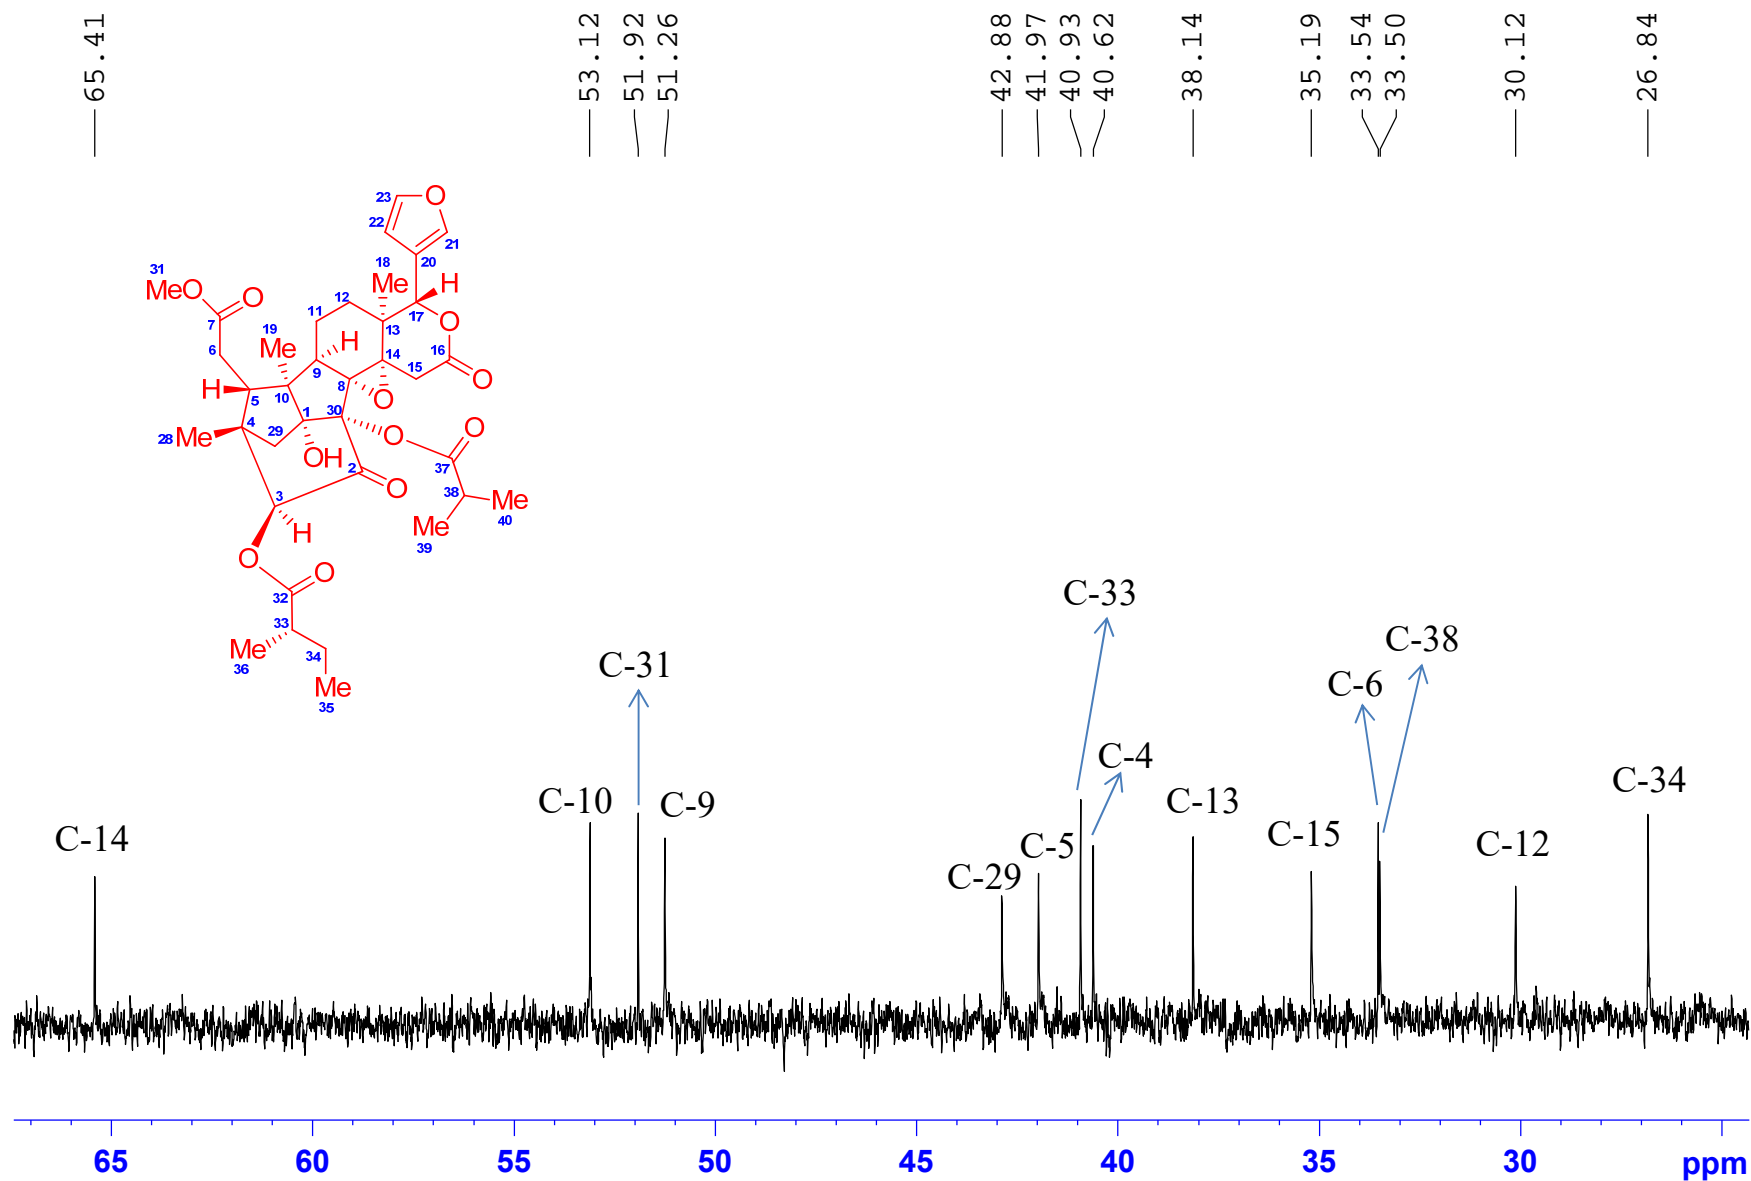

$^{13}\text{C}$  NMR (100 MHz) spectrum of Krishnolide A (**1**) in  $\text{CDCl}_3$

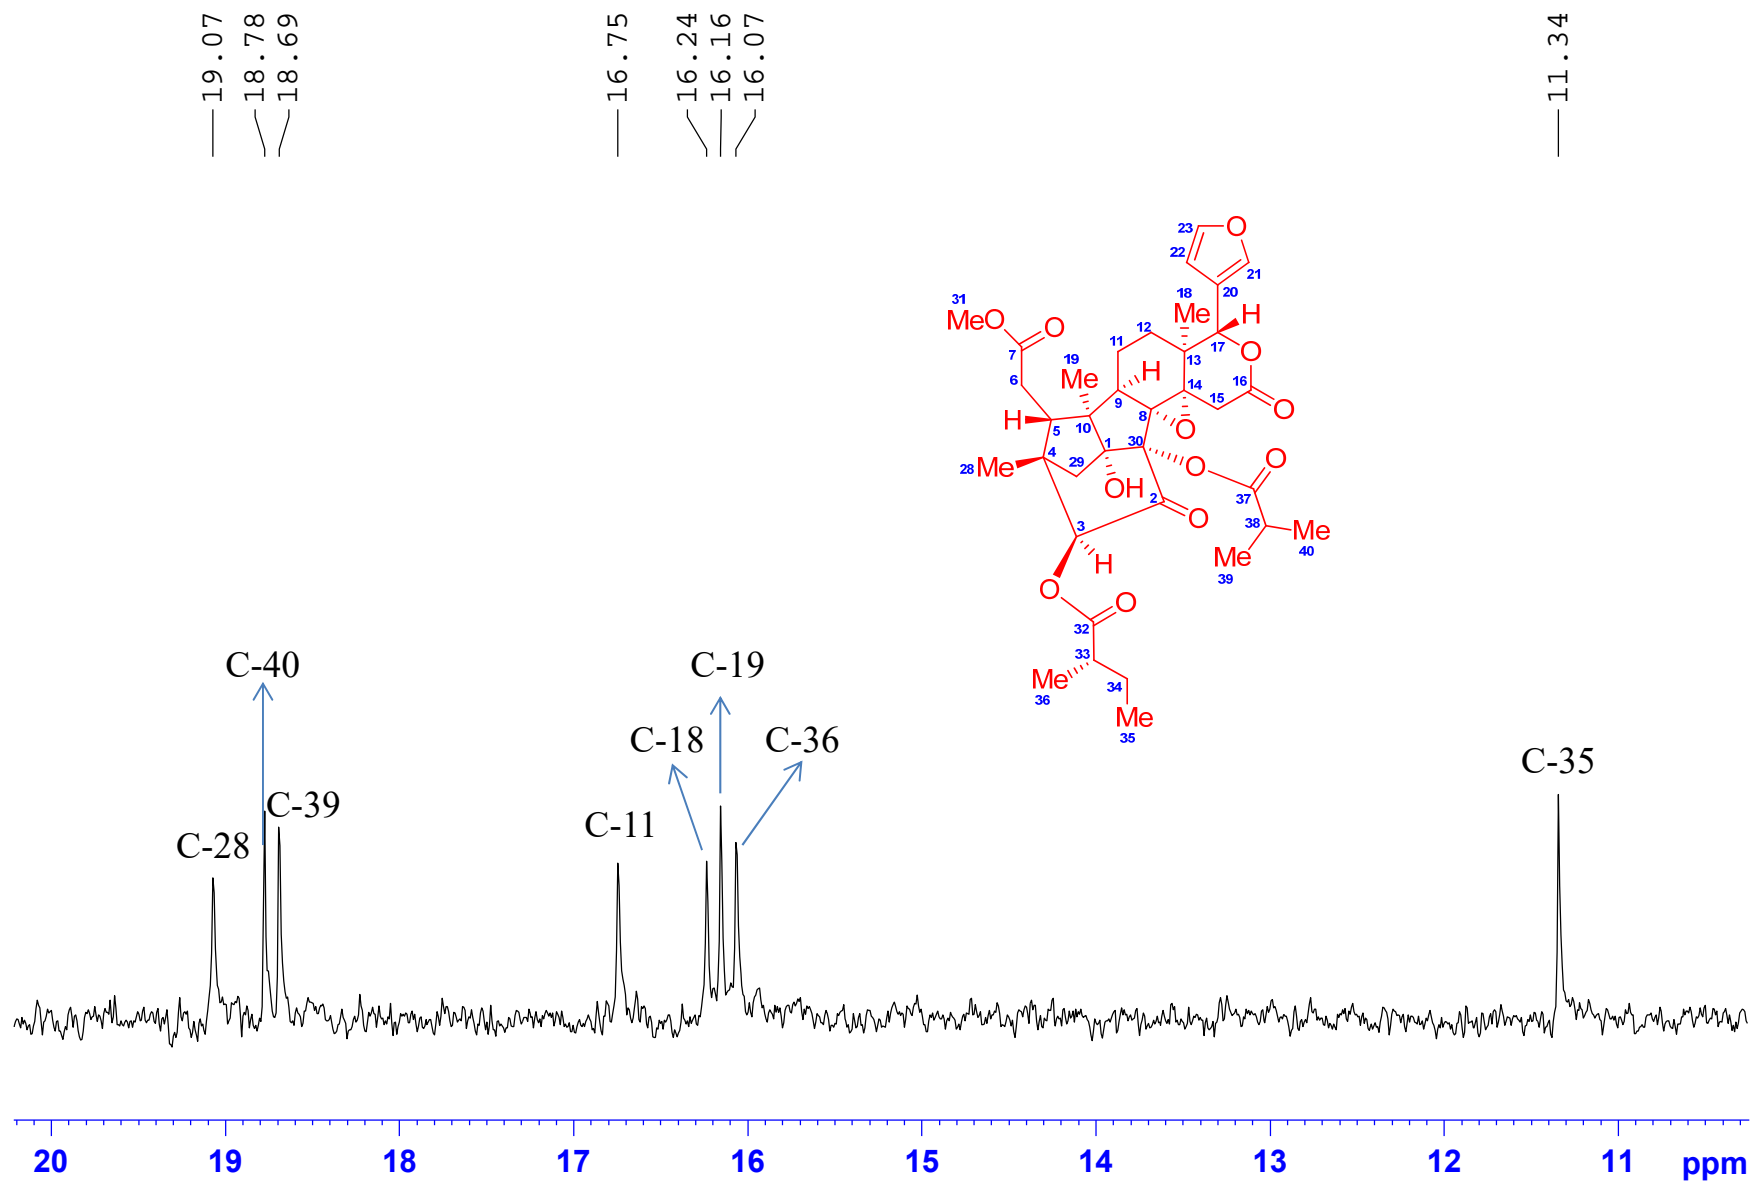

# DEPT 135 spectrum of Krishnolide A (1) in CDCl<sub>3</sub>

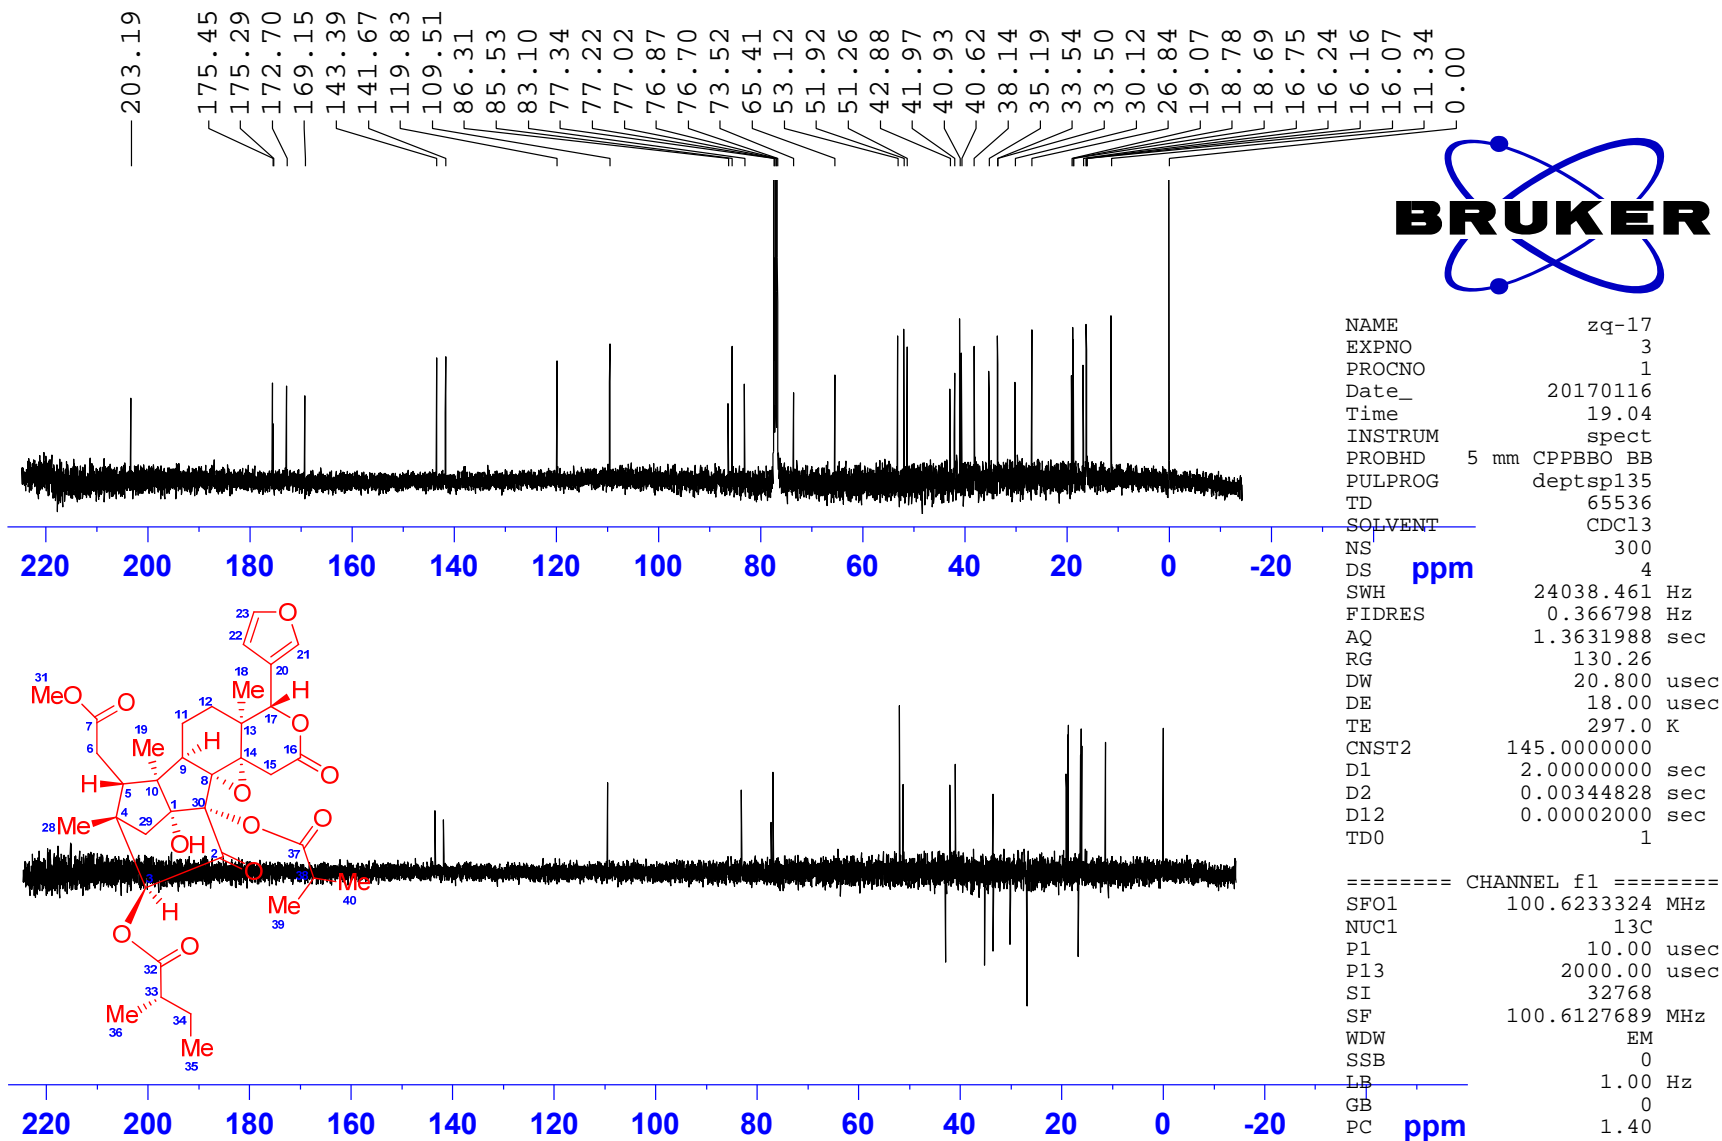



# DEPT 135 spectrum of Krishnolide A (1) in CDCl<sub>3</sub>

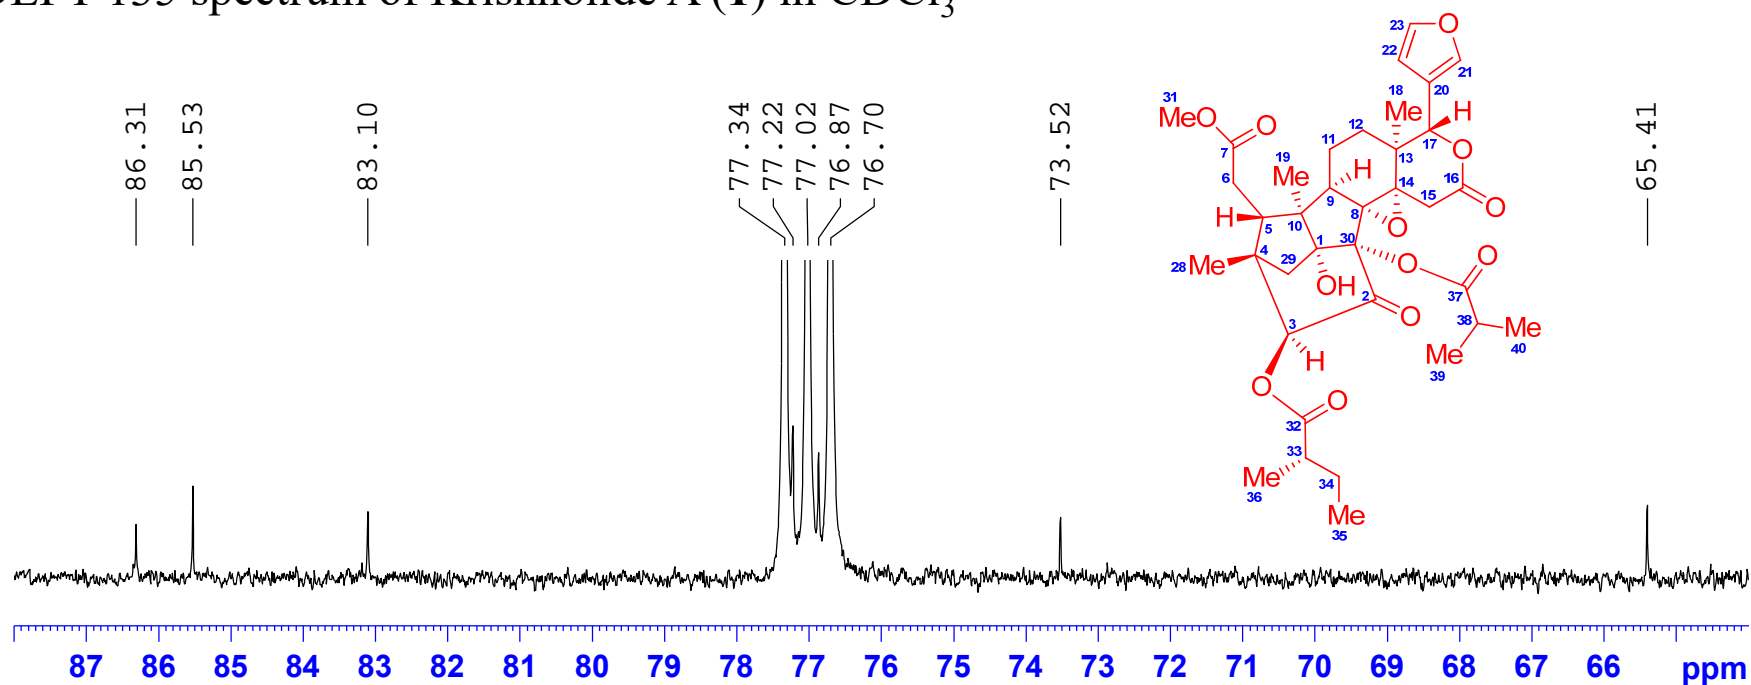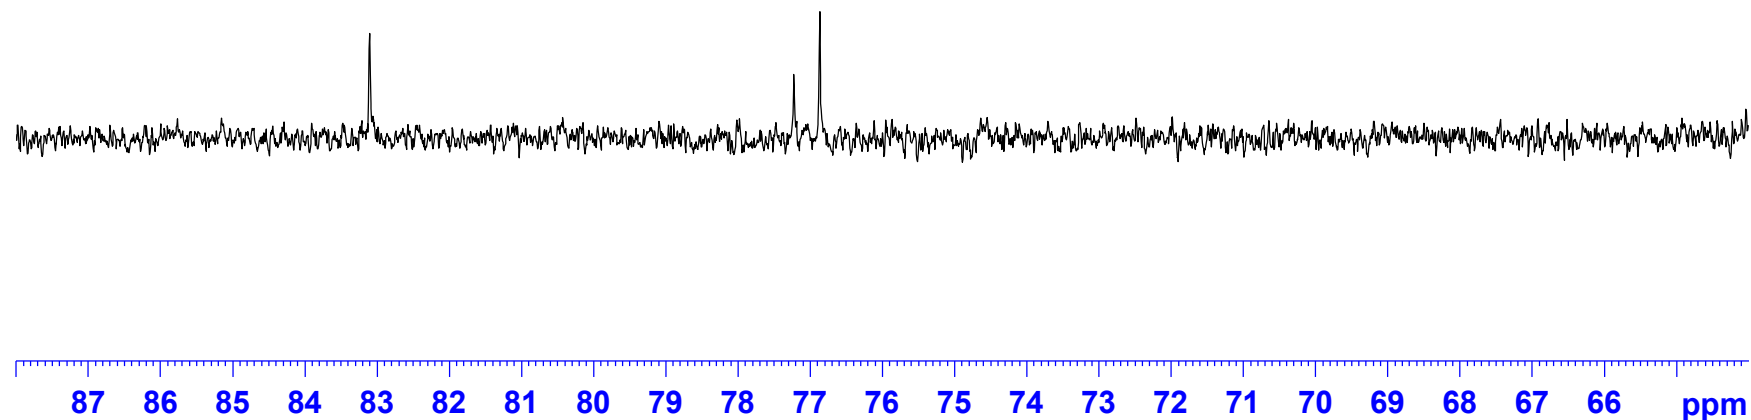

# DEPT 135 spectrum of Krishnolide A (1) in CDCl<sub>3</sub>

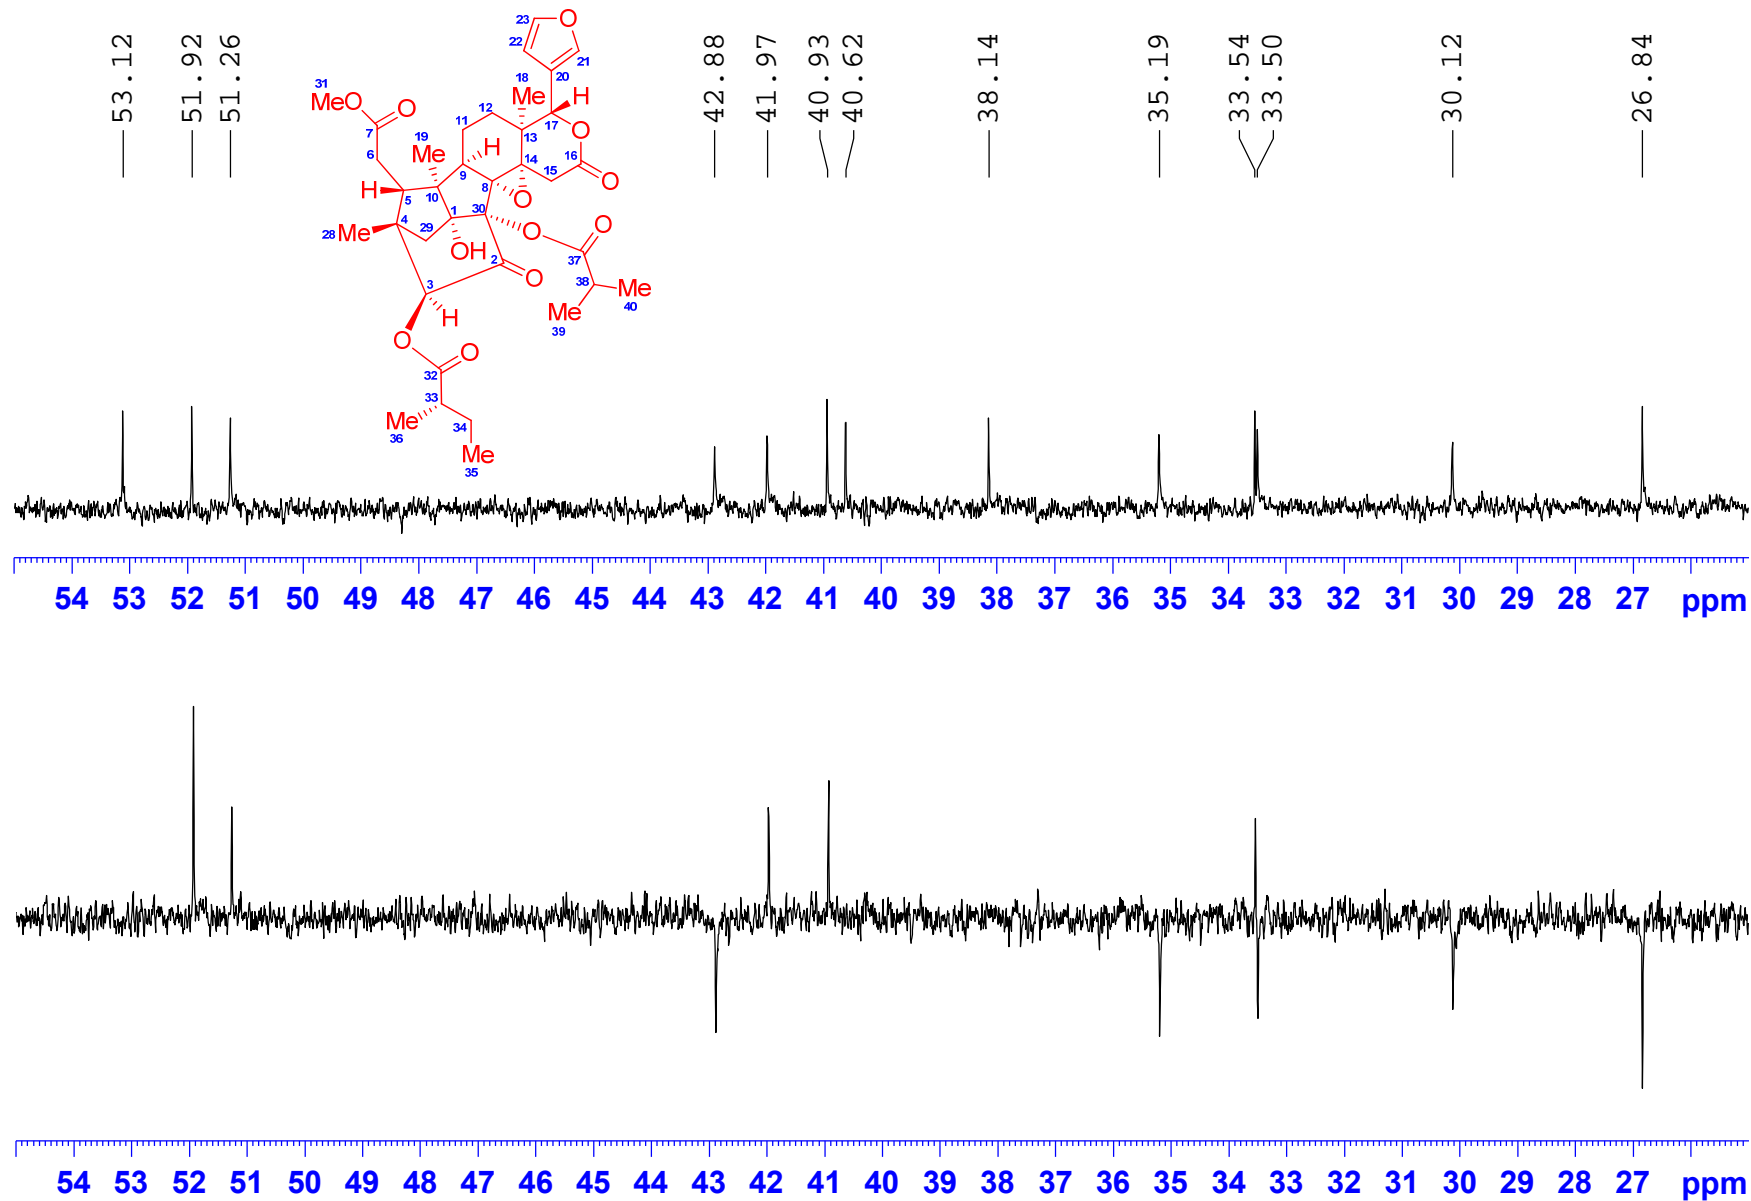

# DEPT 135 spectrum of Krishnolide A (1) in CDCl<sub>3</sub>

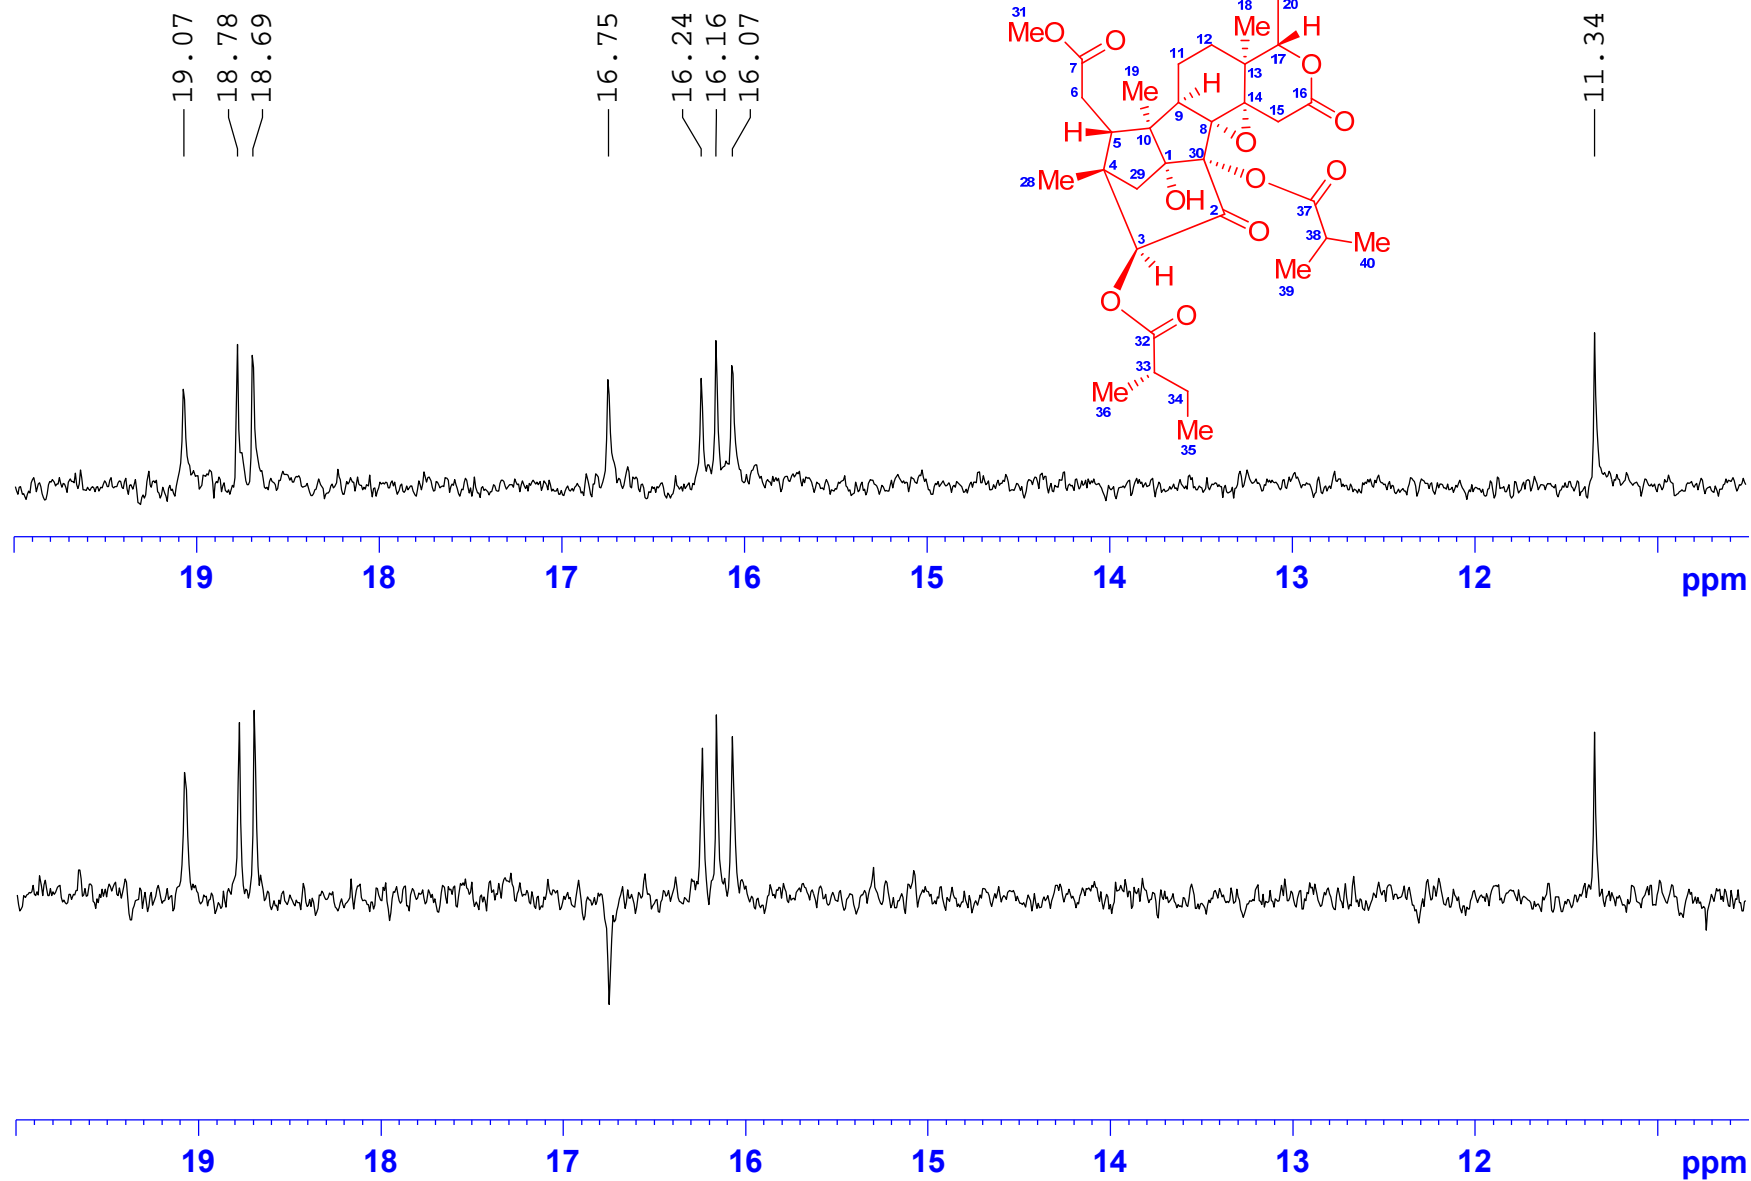

$^1\text{H}$ - $^1\text{H}$  COSY spectrum of Krishnolide A (1) in  $\text{CDCl}_3$

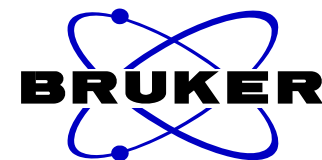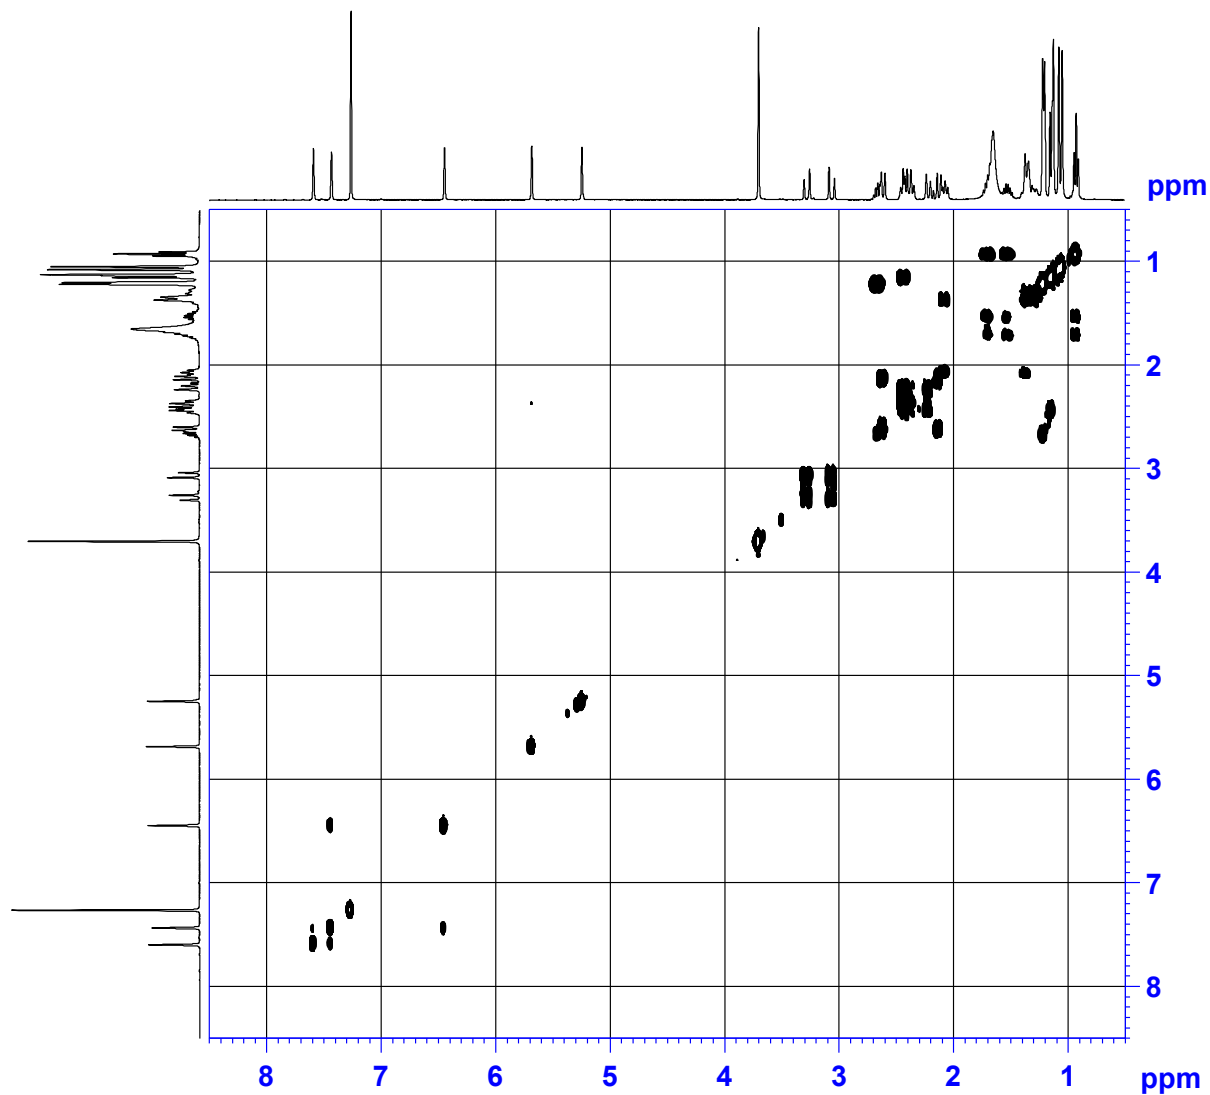

```

NAME          zq-17
EXPNO         4
PROCNO        1
Date_         20161219
Time          22.48
INSTRUM       spect
PROBHD        5 mm CPPBBO BB
PULPROG       cosygpppqf
TD            2048
SOLVENT       CDCl3
NS            8
DS            8
SWH           3906.250 Hz
FIDRES        1.907349 Hz
AQ            0.2621940 sec
RG            208.5
DW            128.000 usec
DE            10.00 usec
TE            297.0 K
D0            0.00000300 sec
D1            1.89678097 sec
D11           0.03000000 sec
D12           0.00002000 sec
D13           0.00000400 sec
D16           0.00020000 sec
IN0           0.00025600 sec
    
```

```

===== CHANNEL f1 =====
SF01         400.1318006 MHz
NUC1          1H
P0            11.50 usec
P1            11.50 usec
P17           2500.00 usec
ND0           1
TD            128
SF01         400.1318 MHz
FIDRES        30.517578 Hz
SW            9.762 ppm
FnMODE        QF
SI            1024
SF            400.1300055 MHz
WDW           QSINE
SSB           0
LB            0.00 Hz
GB            0
PC            1.40
SI            1024
MC2           QF
SF            400.1300055 MHz
WDW           QSINE
SSB           0
LB            0.00 Hz
GB            0
    
```

$^1\text{H}$ - $^1\text{H}$  COSY spectrum of Krishnolide A (1) in  $\text{CDCl}_3$

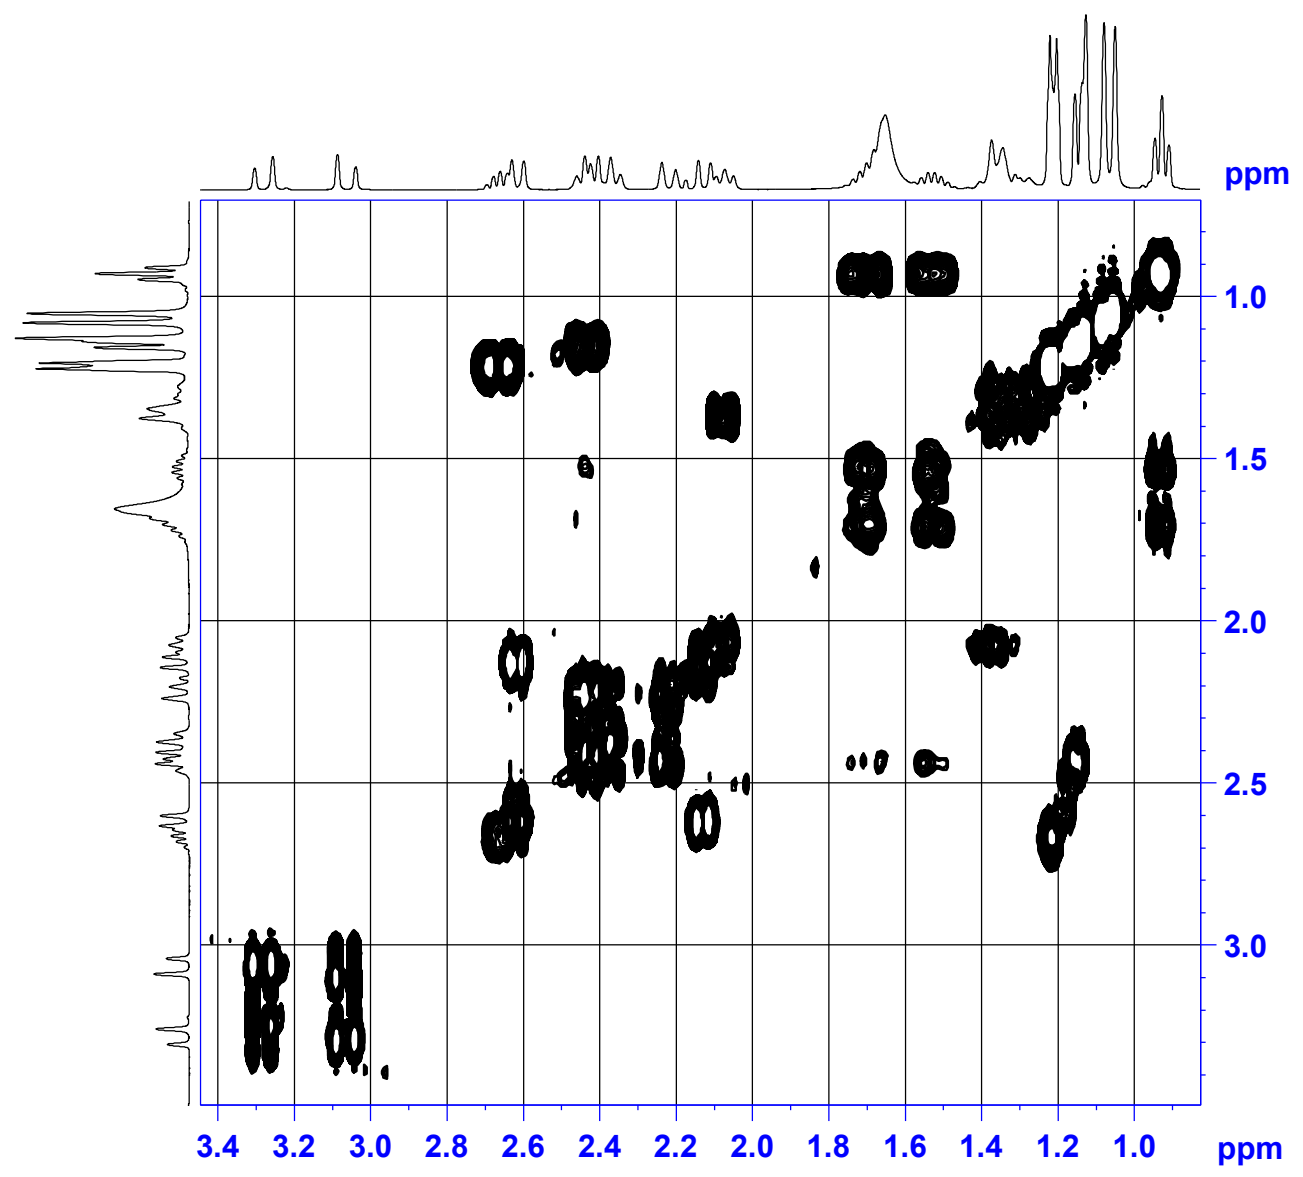

$^1\text{H}$ - $^1\text{H}$  COSY spectrum of Krishnolide A (**1**) in  $\text{CDCl}_3$

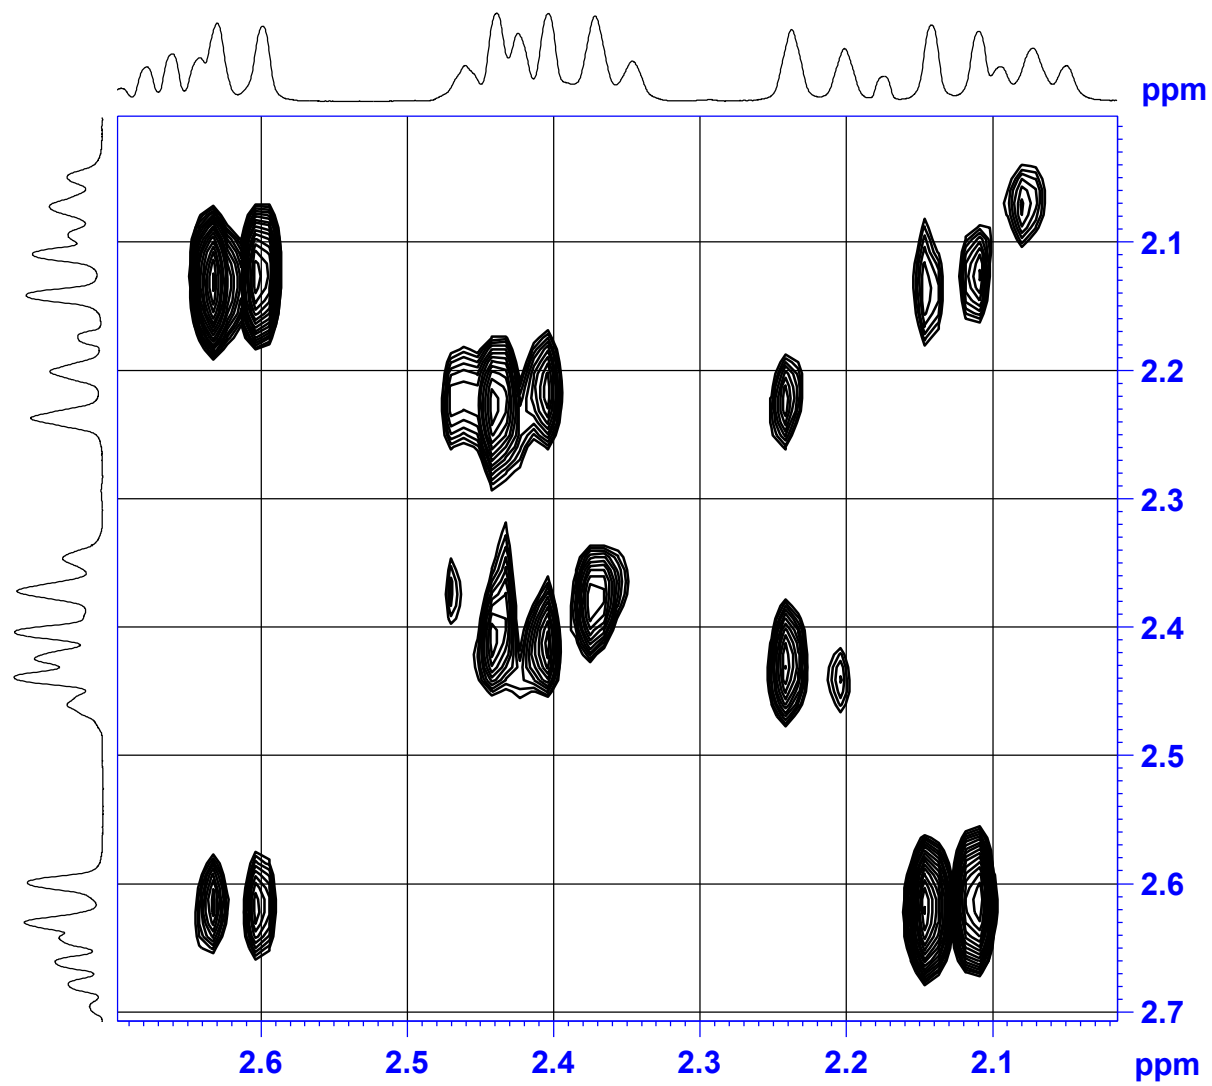

$^1\text{H}$ - $^1\text{H}$  COSY spectrum of Krishnolide A (1) in  $\text{CDCl}_3$

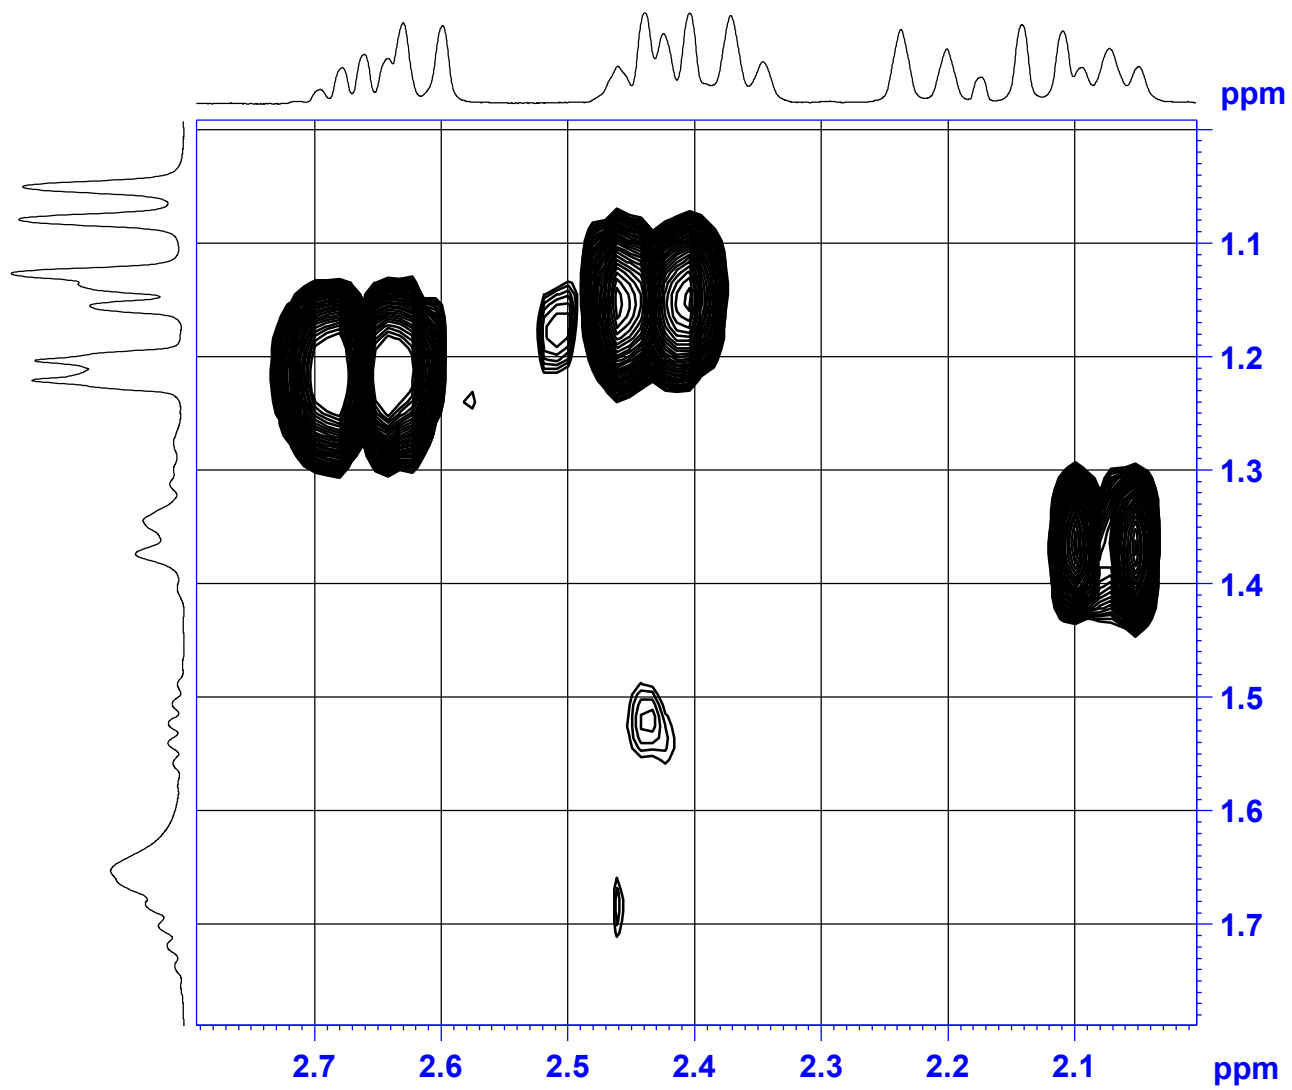

$^1\text{H}$ - $^1\text{H}$  COSY spectrum of Krishnolide A (**1**) in  $\text{CDCl}_3$

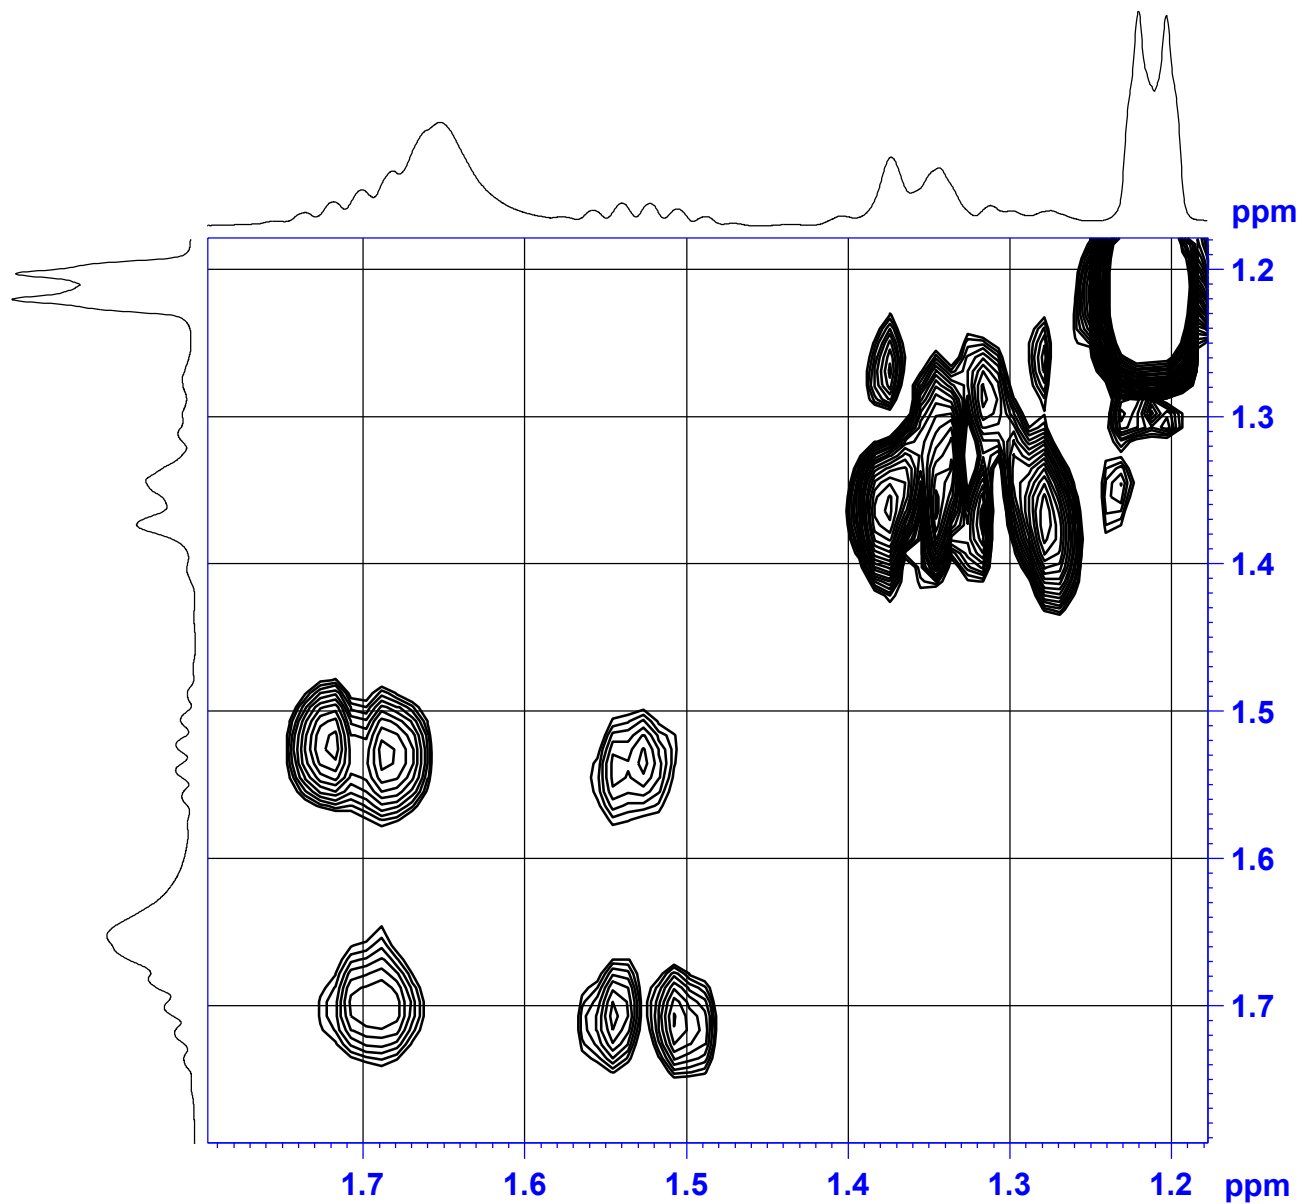



# HSQC spectrum of Krishnolide A (1) in CDCl<sub>3</sub>

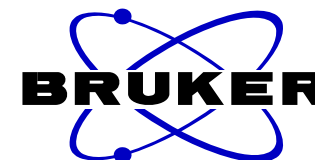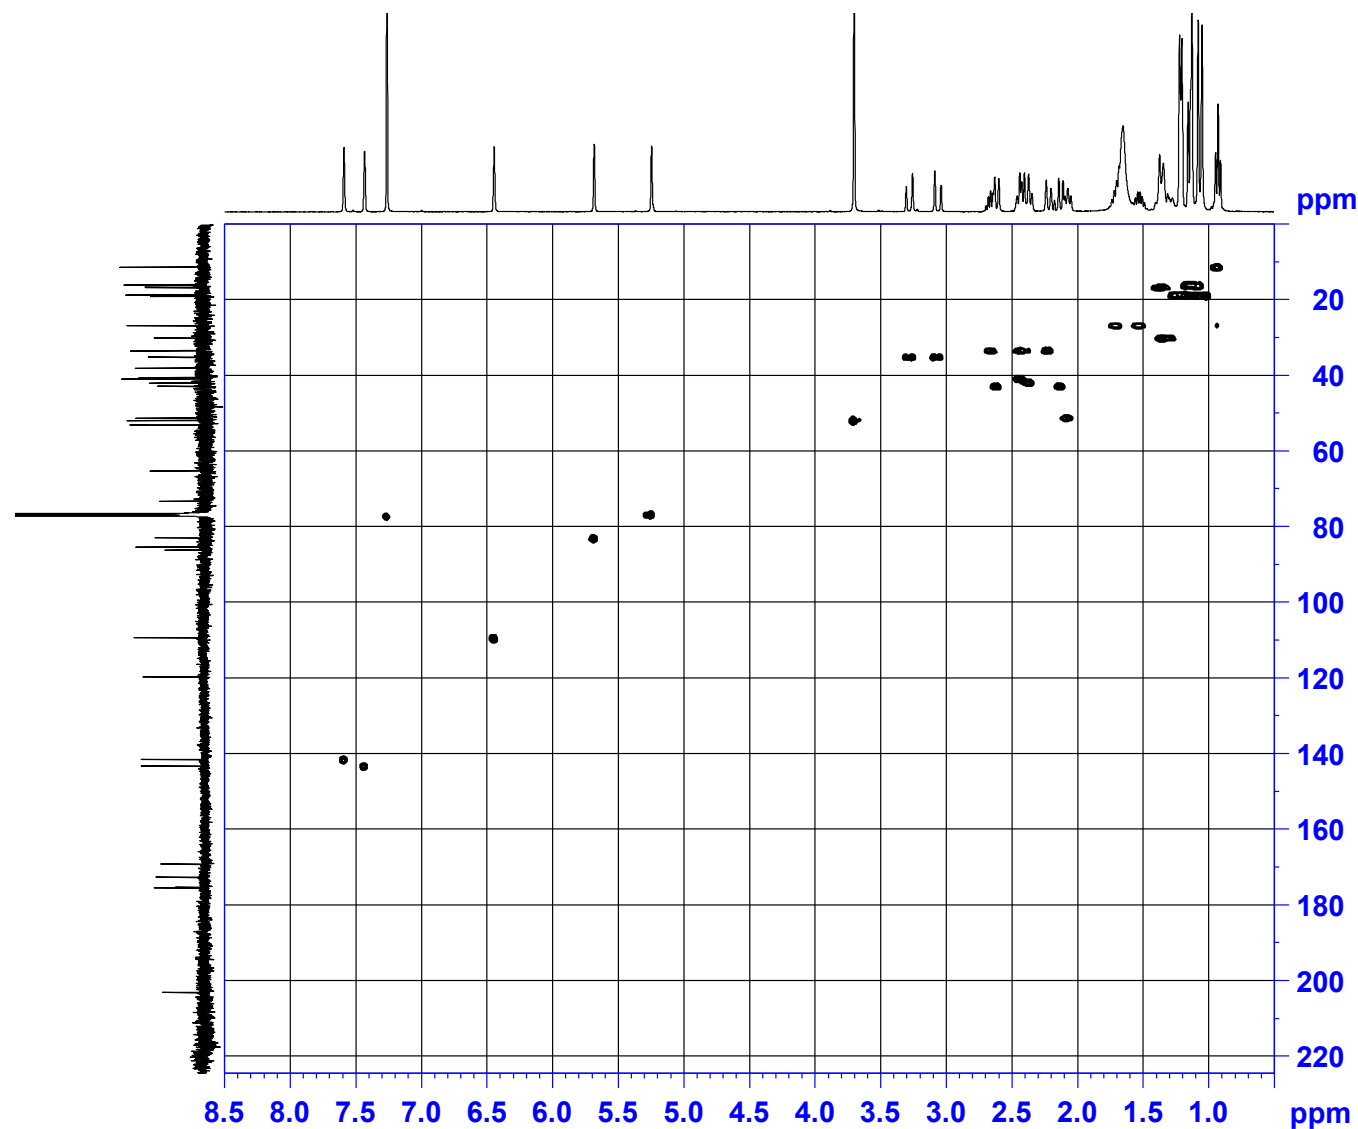

```

NAME          zq-17
EXPNO         5
PROCNO        1
Date_         20161219
Time          23.28
INSTRUM       spect
PROBHD        5 mm CPPBBO BB
PULPROG       hsqcetgps12
TD            1024
SOLVENT       CDCl3
NS            16
DS            16
SWH           4302.926 Hz
FIDRES        4.202076 Hz
AQ            0.1190388 sec
RG            208.5
DW            116.200 usec
DE            10.00 usec
TE            297.0 K
CNST2         145.0000000
D0            0.00000300 sec
D1            1.46497905 sec
D4            0.00172414 sec
D11           0.03000000 sec
D16           0.00020000 sec
D24           0.00086207 sec
IN0           0.00002080 sec
ZGOPTNS
    
```

```

===== CHANNEL f1 =====
SF01          400.1320007 MHz
NUC1           1H
P1             11.50 usec
P2             23.00 usec
P28            0.00 usec
ND0            2
TD             256
SF01          100.6233 MHz
FIDRES         93.900238 Hz
SW             238.896 ppm
FnMODE         Echo-Antiecho
SI             1024
SF             400.1300055 MHz
WDW            QSINE
SSB            2
LB             0.00 Hz
GB             0
PC             1.40
SI             1024
MC2            echo-antiecho
SF             100.6127570 MHz
WDW            QSINE
SSB            2
LB             0.00 Hz
GB             0
    
```

# HSQC spectrum of Krishnolide A (1) in CDCl<sub>3</sub>

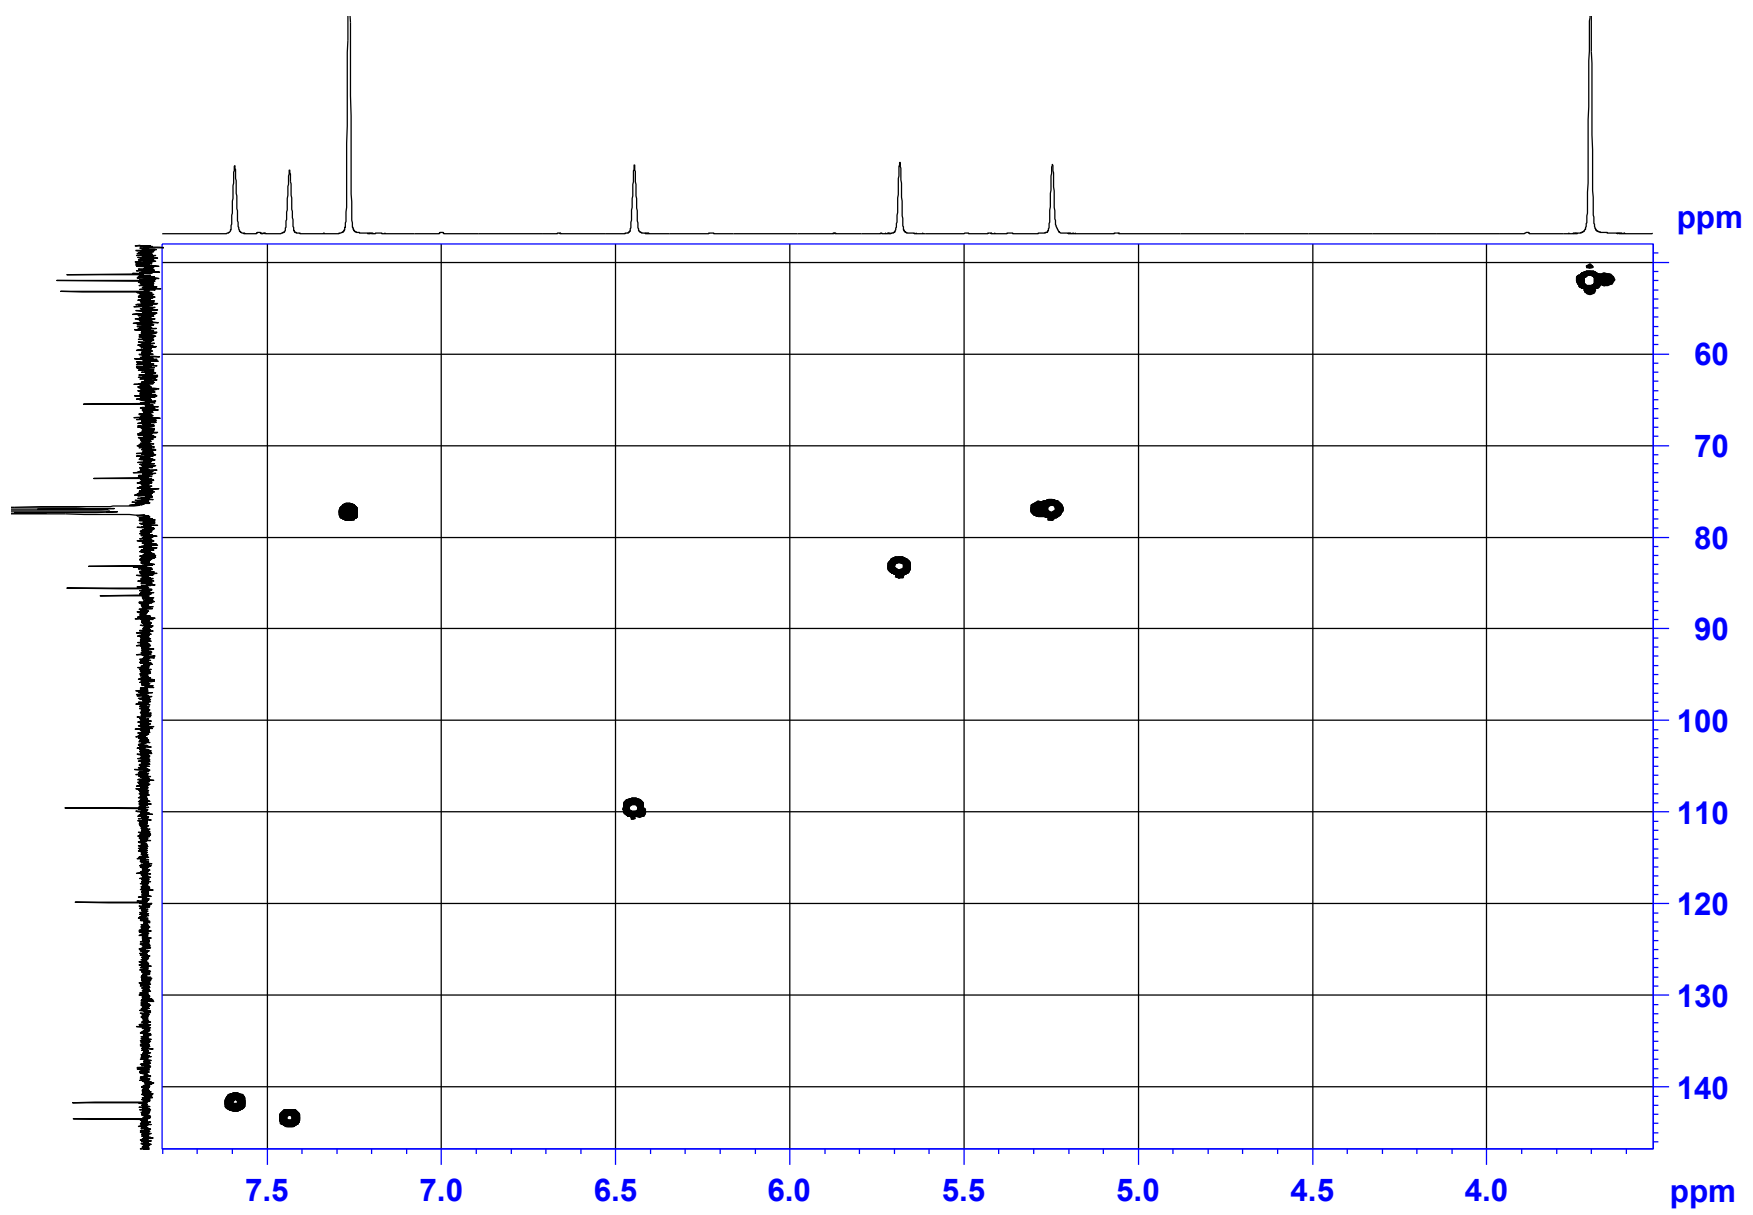

# HSQC spectrum of Krishnolide A (1) in CDCl<sub>3</sub>

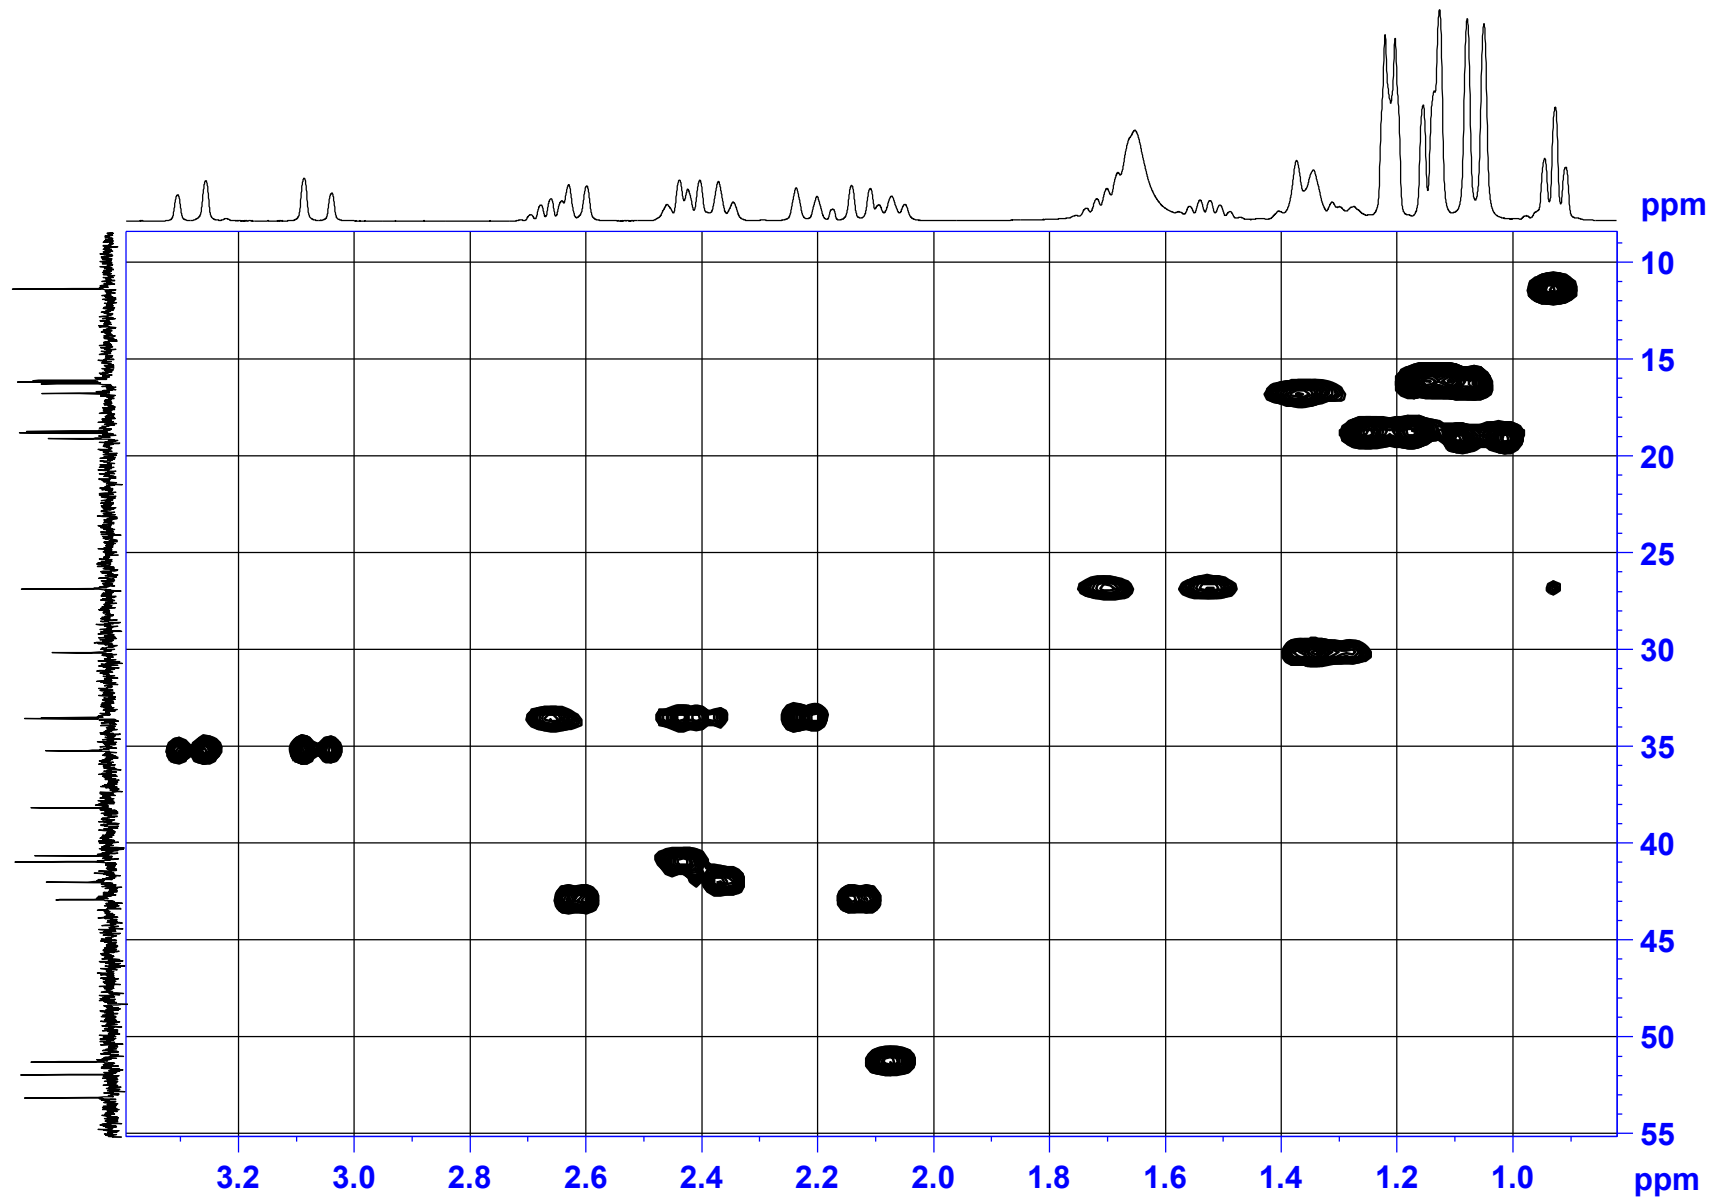

# HSQC spectrum of Krishnolide A (1) in CDCl<sub>3</sub>



# HSQC spectrum of Krishnolide A (1) in CDCl<sub>3</sub>

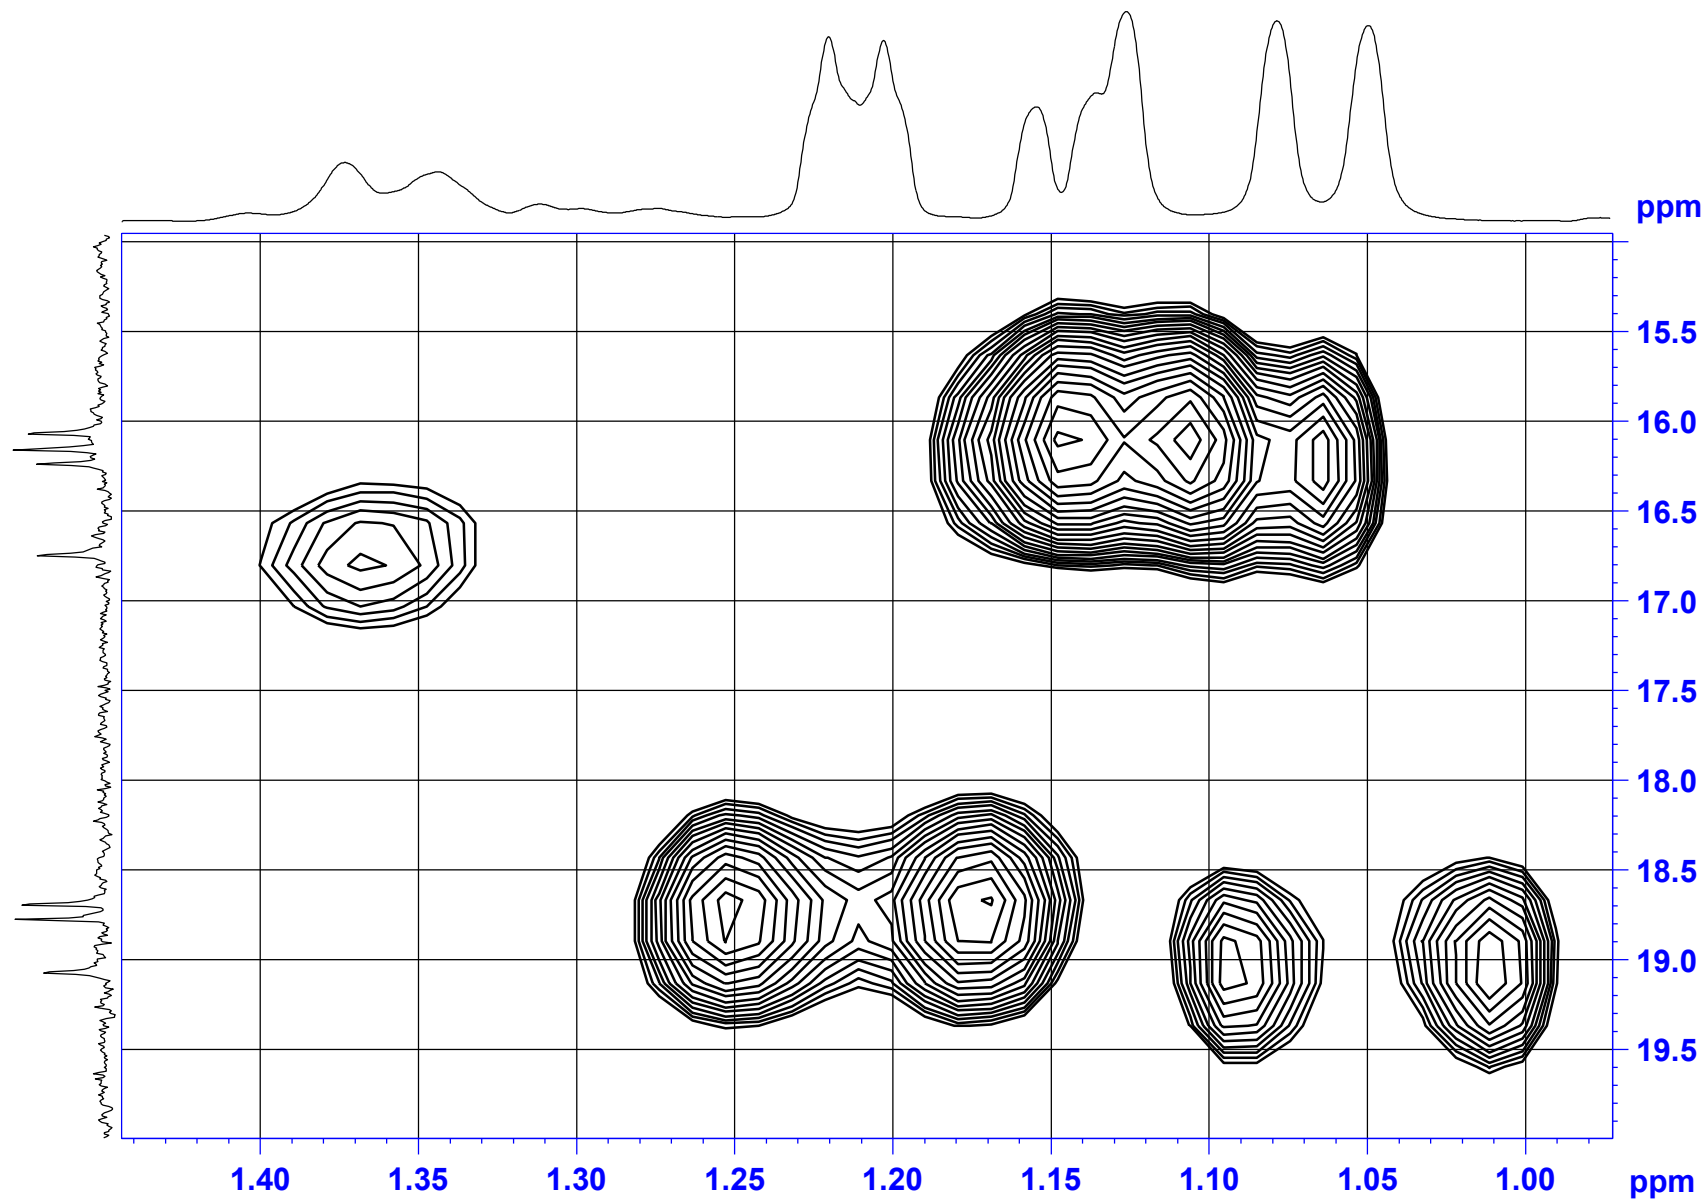

# HMBC spectrum of Krishnolide A (1) in CDCl<sub>3</sub>

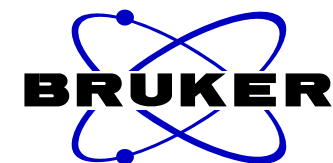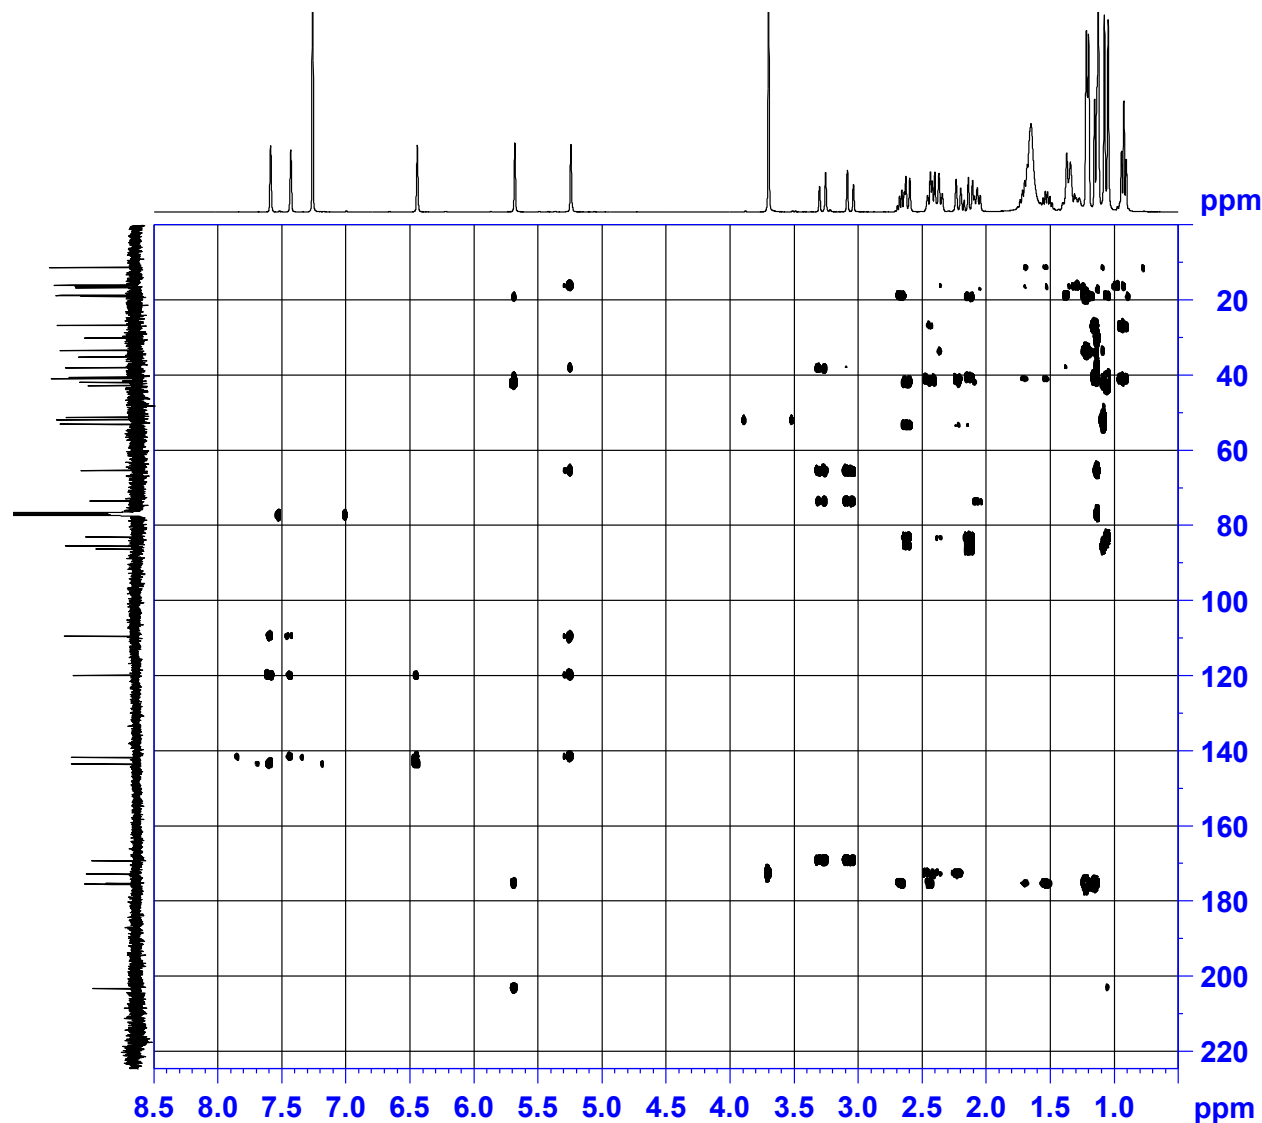

```

NAME          zq-17
EXPNO         6
PROCNO        1
Date_         20161220
Time          1.19
INSTRUM       spect
PROBHD        5 mm CPPBBO BB
PULPROG       hmbcgp1pndqf
TD            4096
SOLVENT       CDCl3
NS            32
DS            16
SWH           5197.505 Hz
FIDRES        1.268922 Hz
AQ            0.3940852 sec
RG            208.5
DW            96.200 usec
DE            10.00 usec
TE            297.0 K
CNST2         145.0000000
CNST13        10.0000000
D0            0.00000300 sec
D1            1.50000000 sec
D2            0.00344828 sec
D6            0.05000000 sec
D16           0.00020000 sec
IN0           0.00002080 sec
    
```

```

===== CHANNEL f1 =====
SFO1          400.1323208 MHz
NUC1          1H
P1            11.50 usec
P2            23.00 usec
ND0           2
TD            128
SFO1          100.6233 MHz
FIDRES        187.800476 Hz
SW            238.896 ppm
FnMODE        QF
SI            2048
SF            400.1300055 MHz
WDW           SINE
SSB           0
LB            0.00 Hz
GB            0
PC            1.40
SI            1024
MC2           QF
SF            100.6127570 MHz
WDW           SINE
SSB           0
LB            0.00 Hz
GB            0
    
```

# HMBC spectrum of Krishnolide A (1) in CDCl<sub>3</sub>

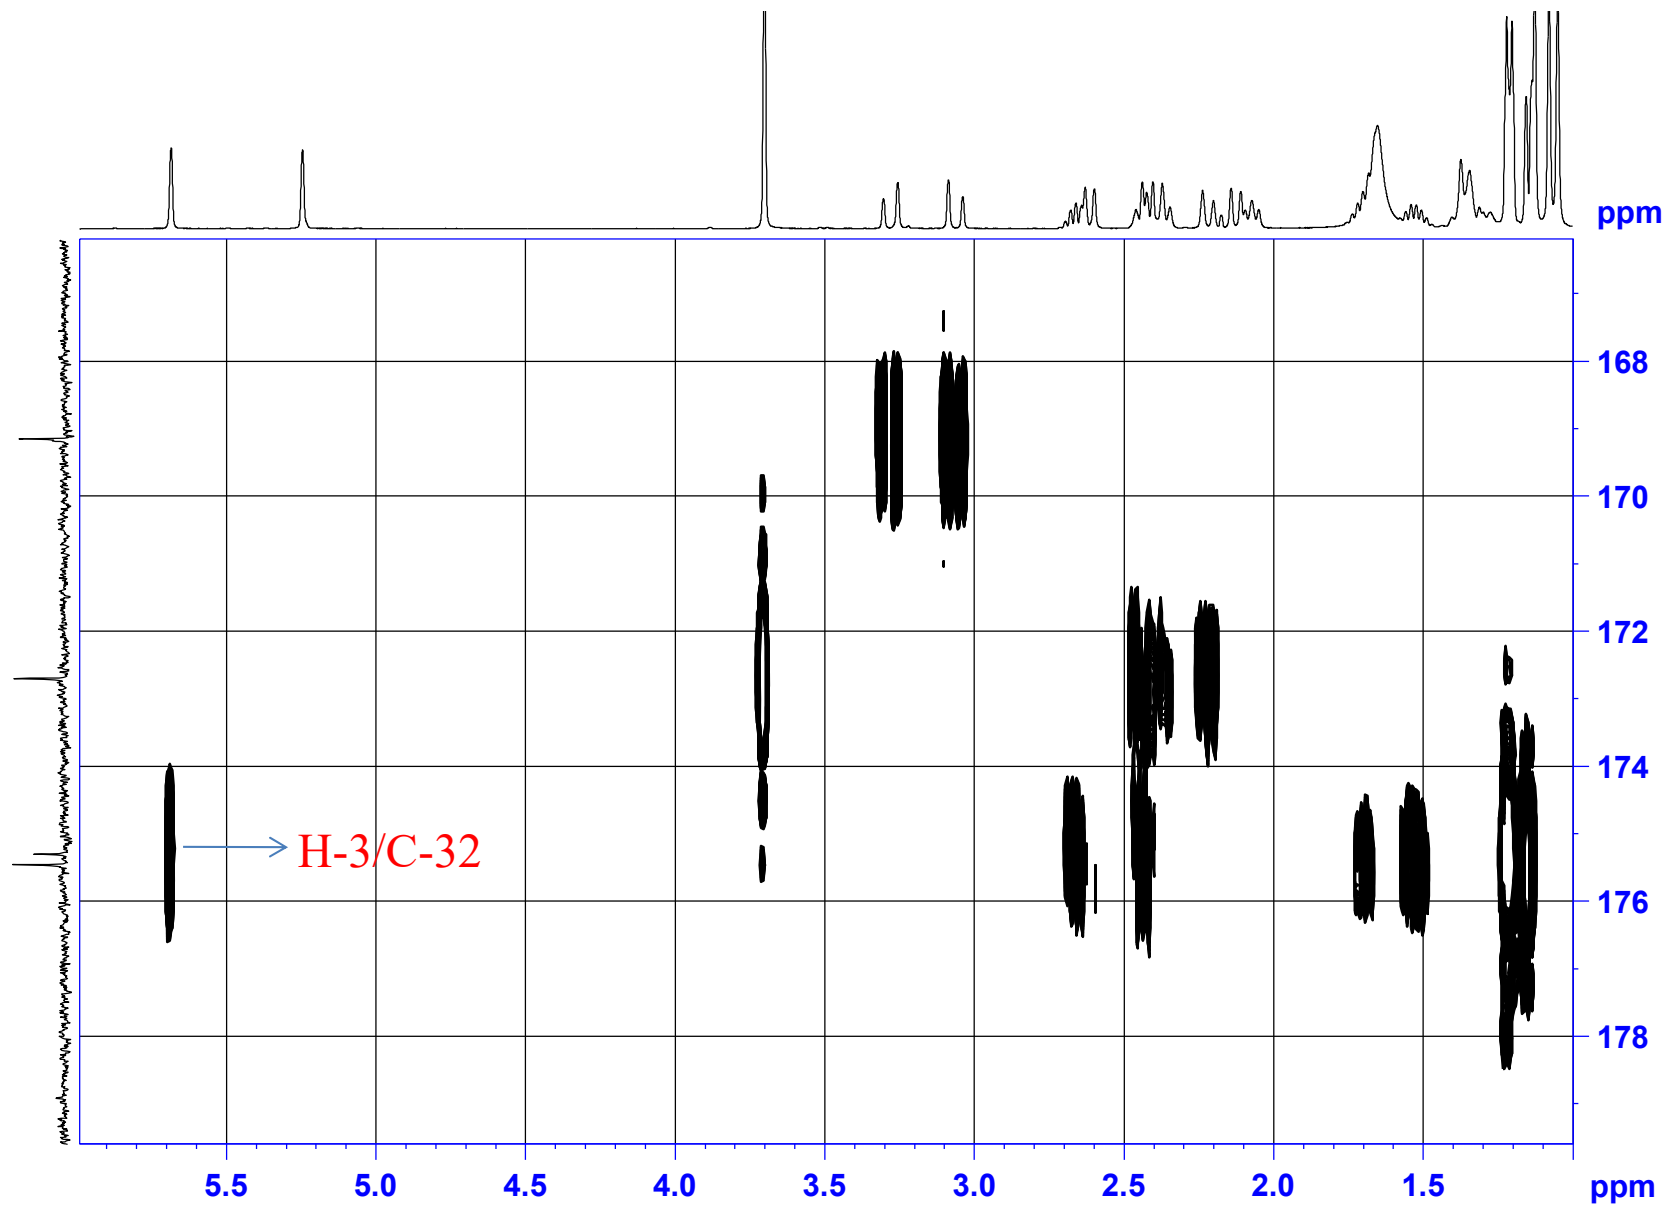

HMBC spectrum of Krishnolide A (1) in CDCl<sub>3</sub>

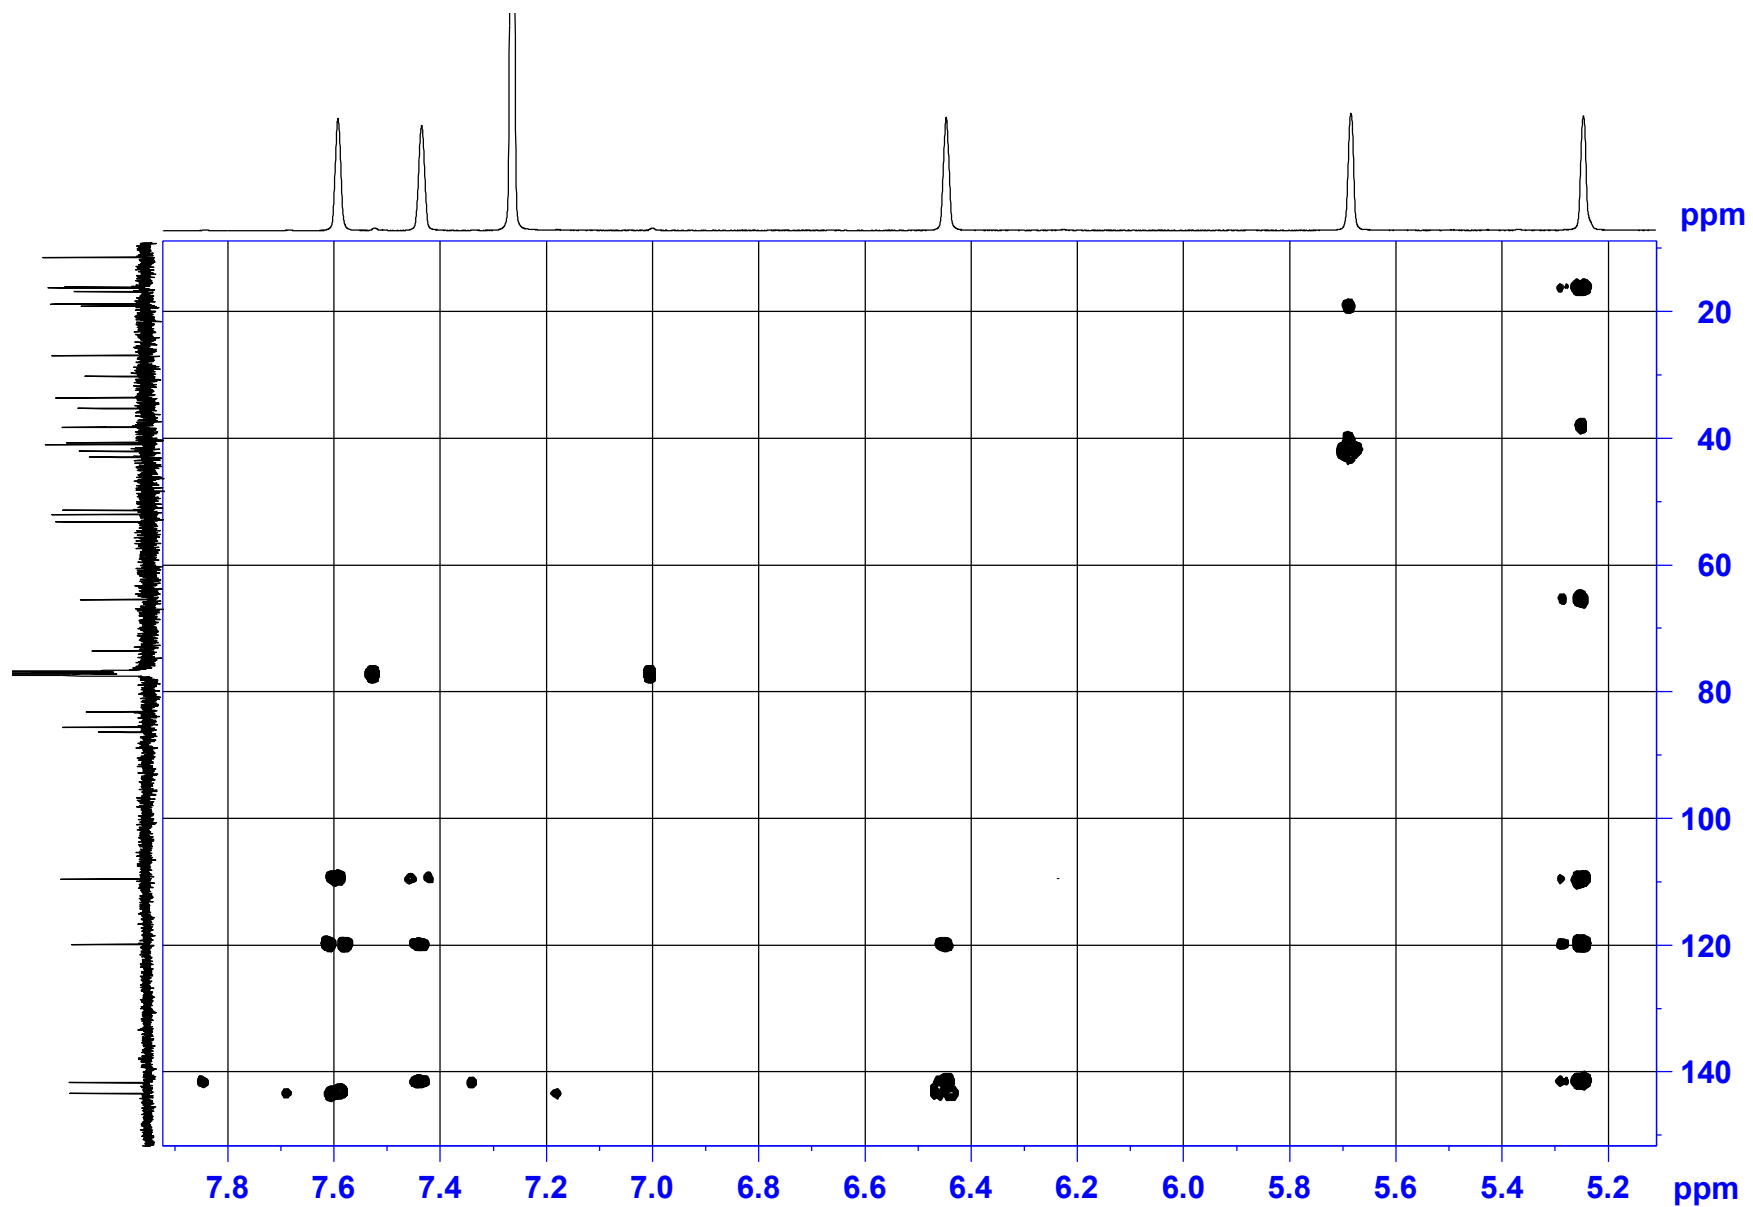



# HMBC spectrum of Krishnolide A (1) in CDCl<sub>3</sub>

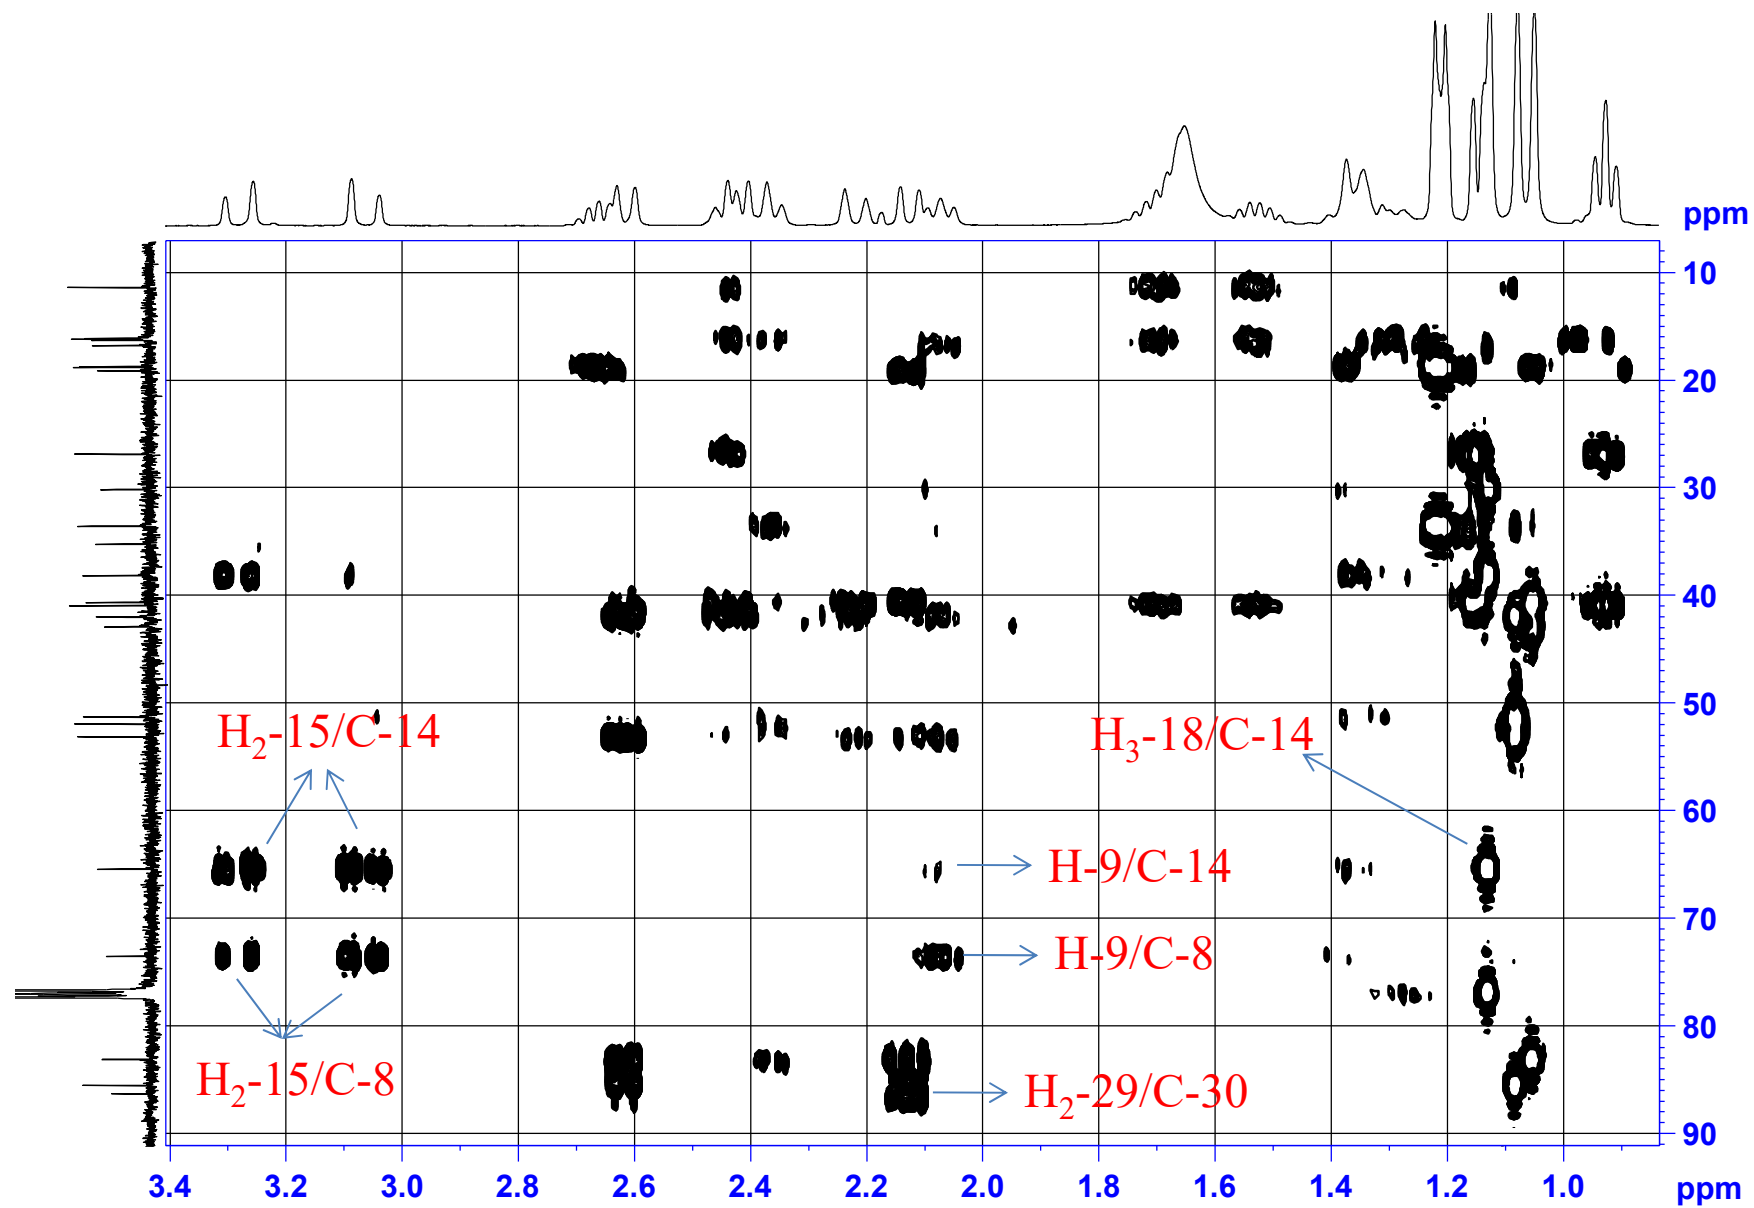

# HMBC spectrum of Krishnolide A (1) in CDCl<sub>3</sub>

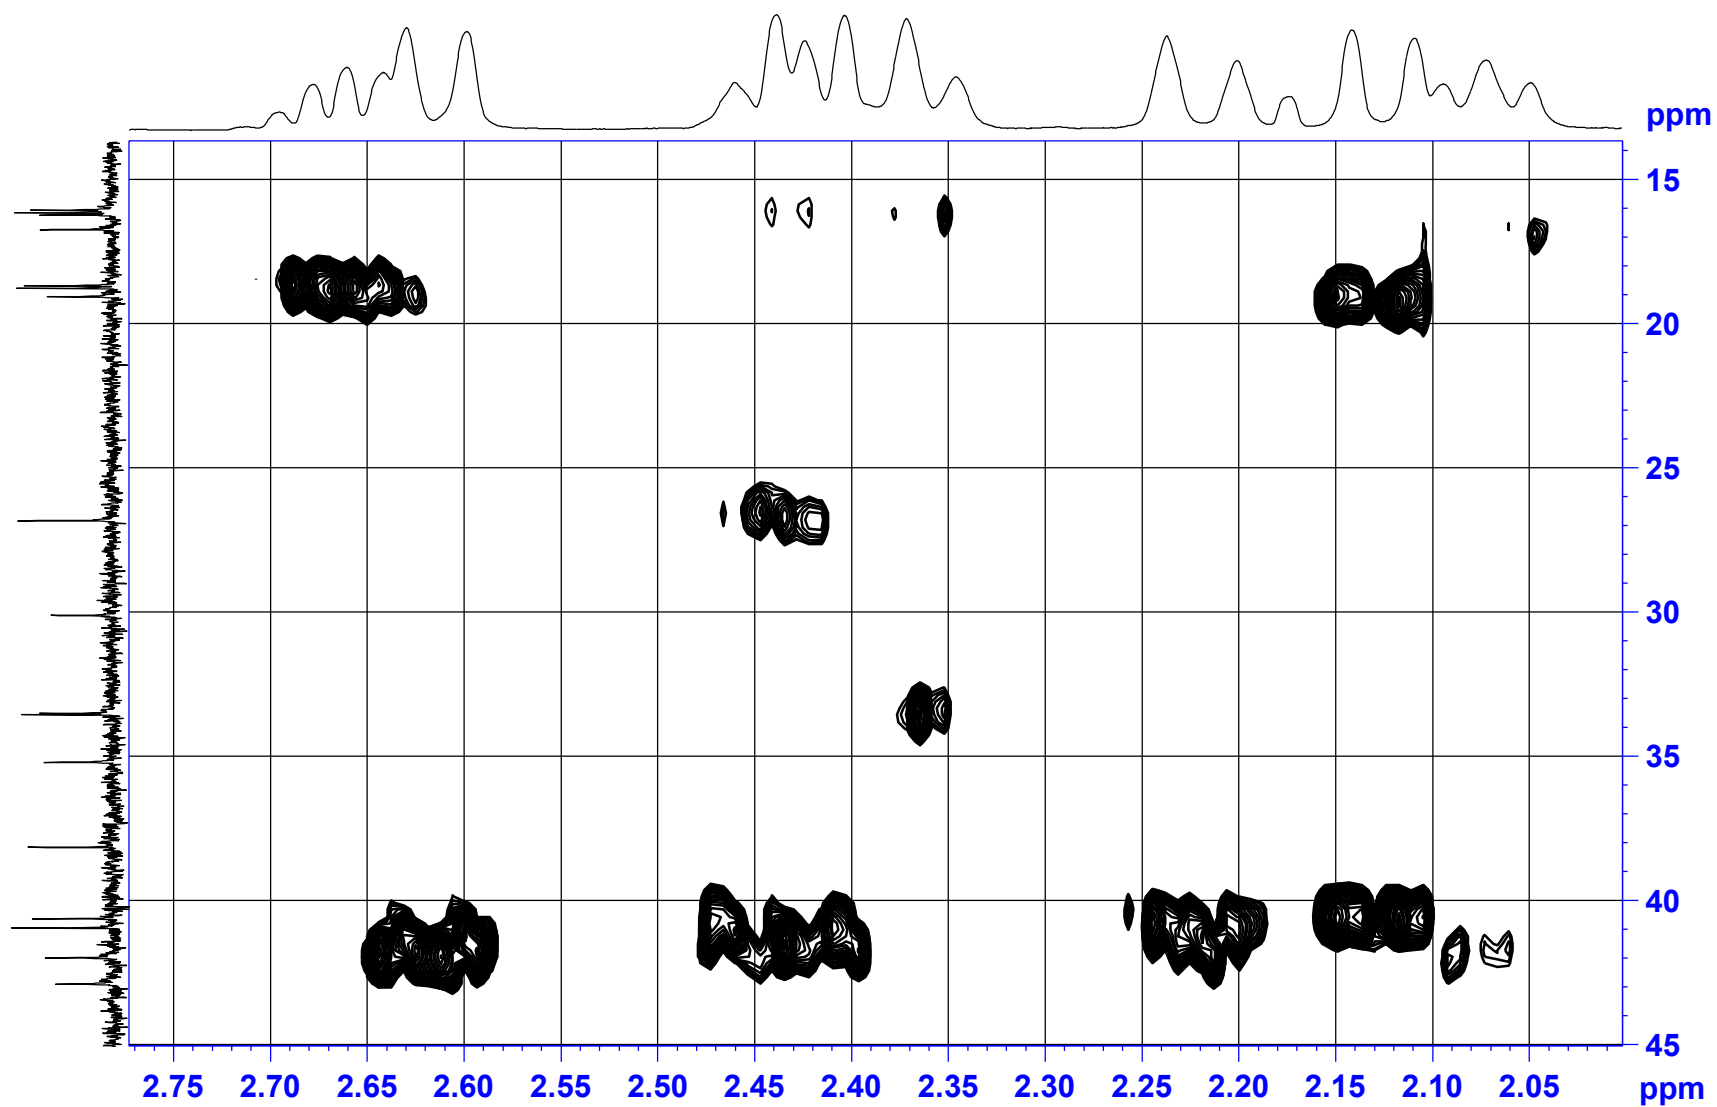

HMBC spectrum of Krishnolide A (1) in CDCl<sub>3</sub>

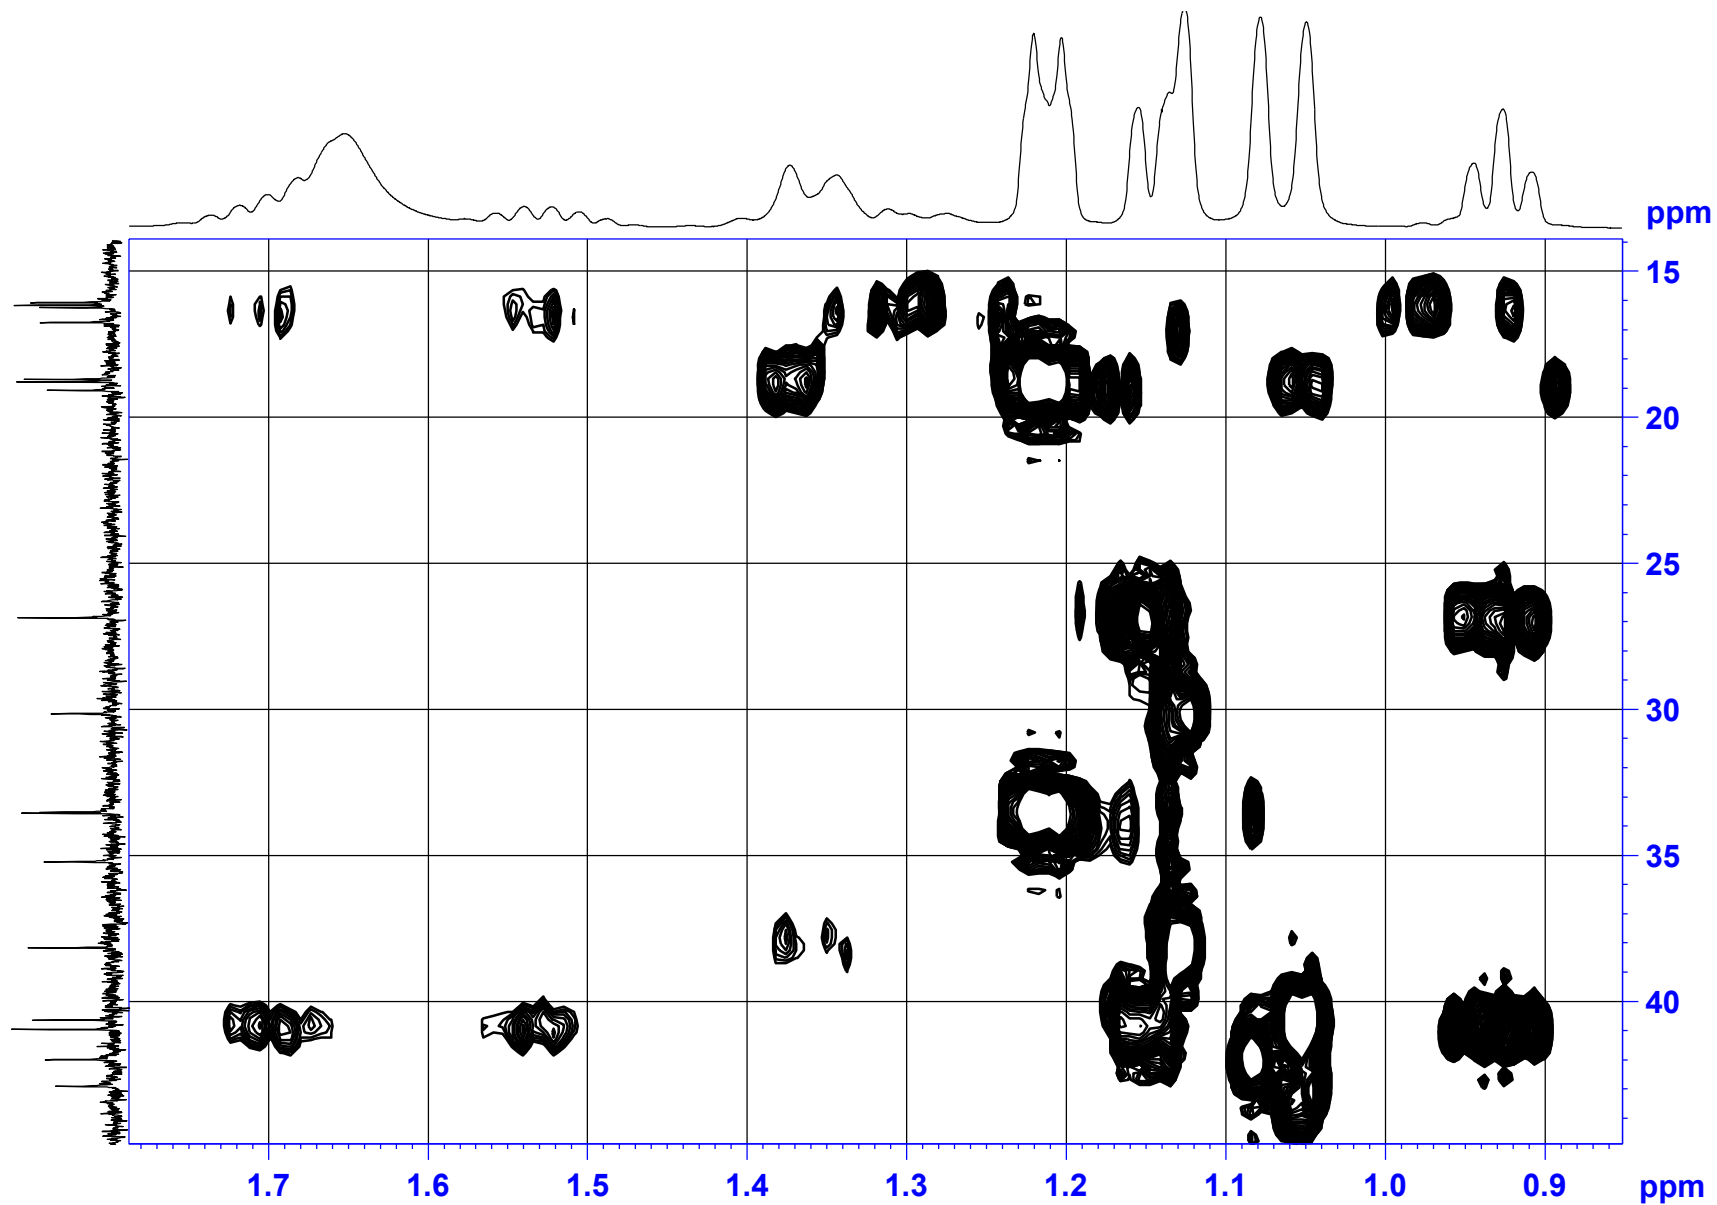

# NOESY spectrum of Krishnolide A (1) in CDCl<sub>3</sub>

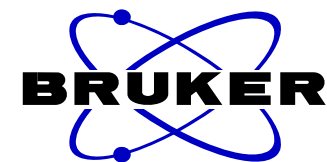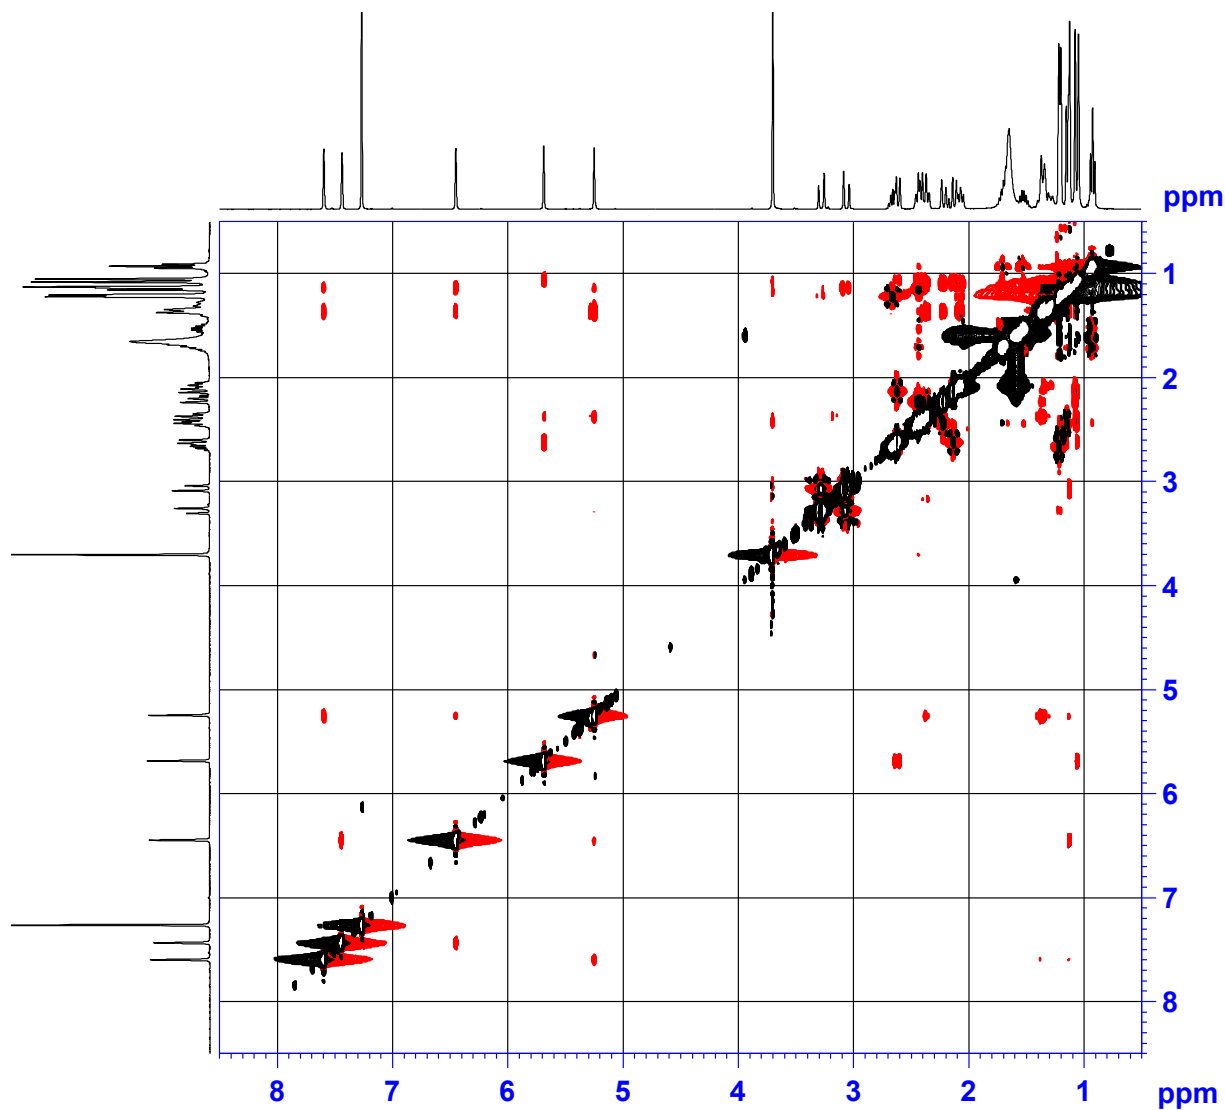

```

NAME          zq-17
EXPNO         7
PROCNO        1
Date_         20161220
Time          3.35
INSTRUM       spect
PROBHD        5 mm CPPBBO BB
PULPROG       noesygpphpp
TD            2048
SOLVENT       CDCl3
NS            16
DS            32
SWH           4000.000 Hz
FIDRES        1.953125 Hz
AQ            0.2560500 sec
RG            208.5
DW            125.000 usec
DE            10.00 usec
TE            297.0 K
D0            0.00011036 sec
D1            1.99385595 sec
D8            0.30000001 sec
D11           0.03000000 sec
D12           0.00002000 sec
D16           0.00020000 sec
IN0           0.00025000 sec
    
```

```

===== CHANNEL f1 =====
SFO1         400.1318006 MHz
NUC1         1H
P1           11.50 usec
P2           23.00 usec
P17          2500.00 usec
ND0          1
TD           256
SFO1         400.1318 MHz
FIDRES       15.625000 Hz
SW           9.997 ppm
FnMODE       States-TPPI
SI           1024
SF           400.1300055 MHz
WDW          QSINE
SSB          2
LB           0.00 Hz
GB           0
PC           1.00
SI           1024
MC2          States-TPPI
SF           400.1300055 MHz
WDW          QSINE
SSB          2
LB           0.00 Hz
GB           0
    
```

NOESY spectrum of Krishnolide A (1) in  $\text{CDCl}_3$

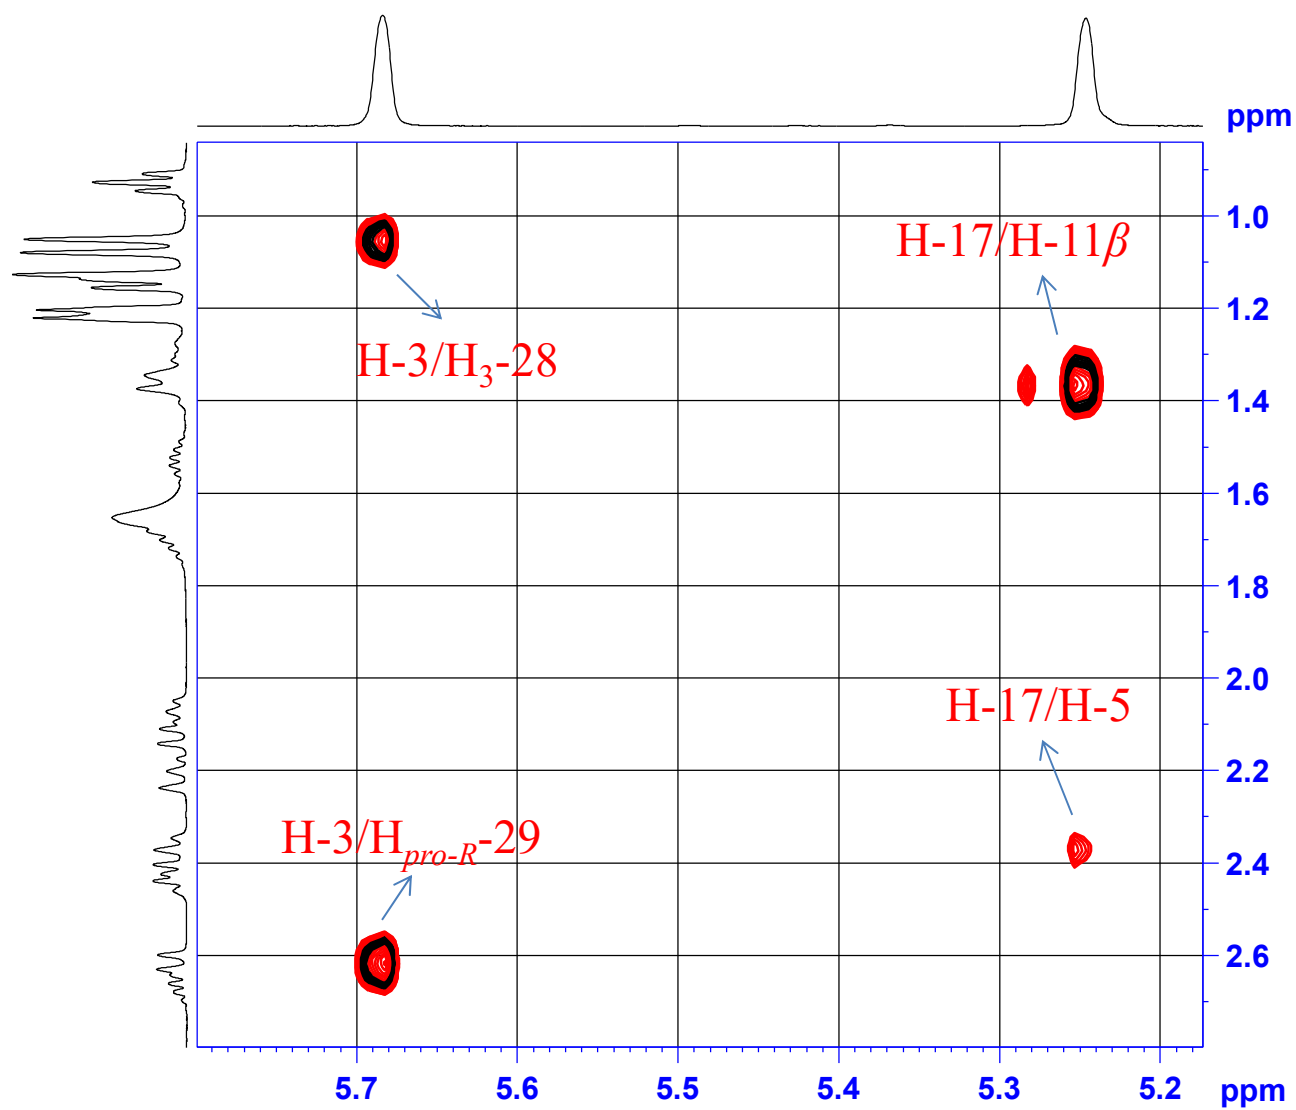

NOESY spectrum of Krishnolide A (1) in  $\text{CDCl}_3$

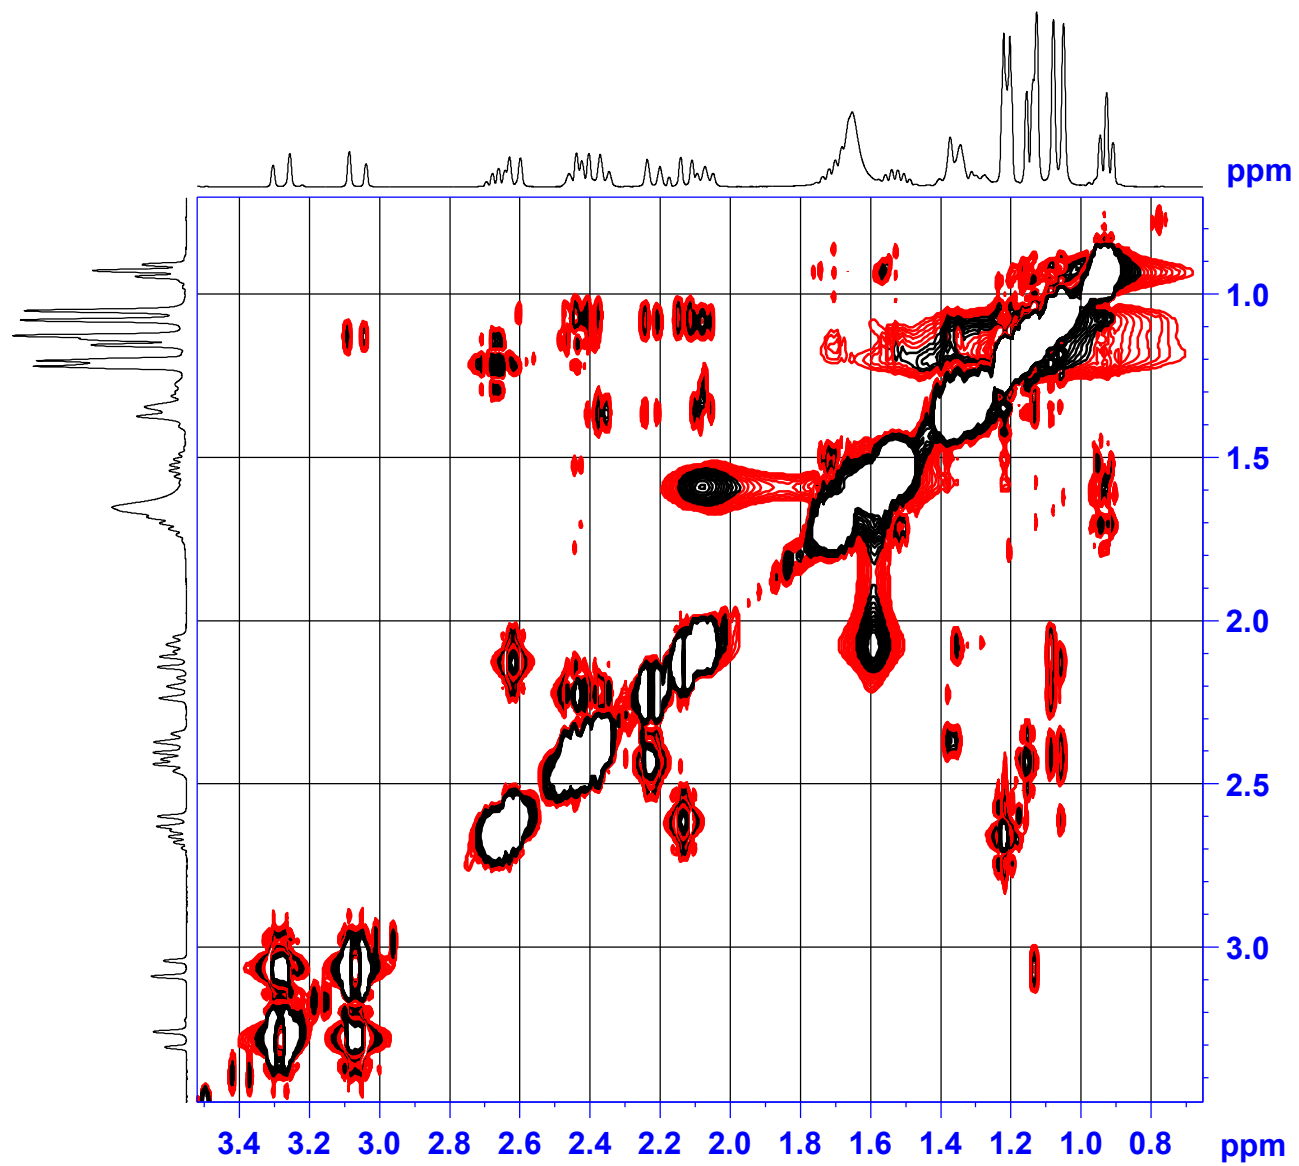

# NOESY spectrum of Krishnolide A (1) in CDCl<sub>3</sub>

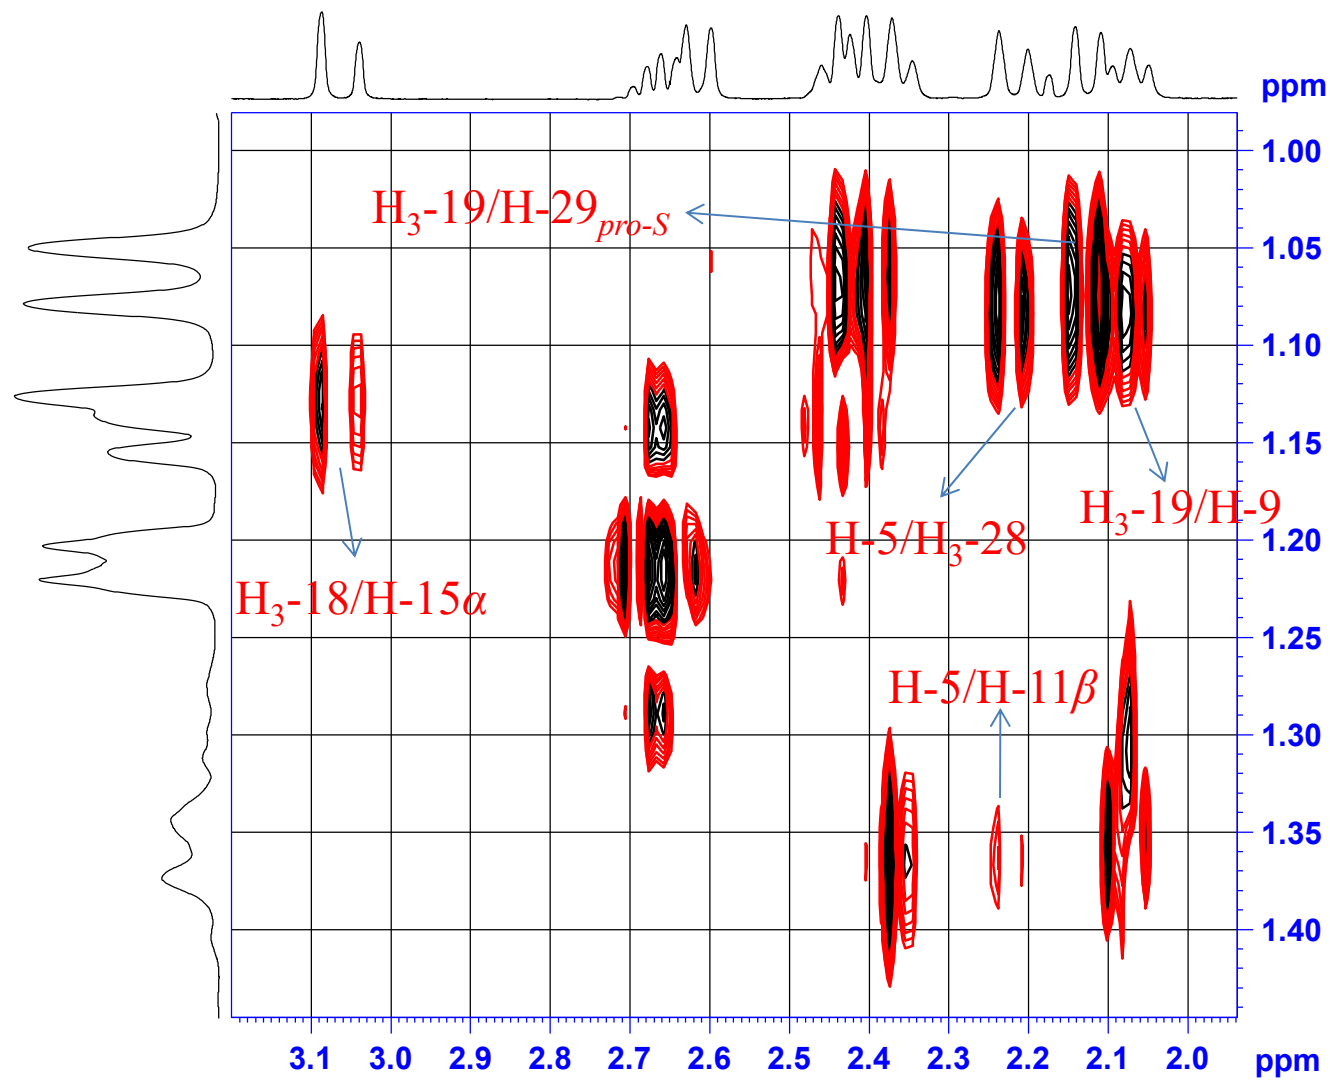

# NOESY spectrum of Krishnolide A (1) in $\text{CDCl}_3$

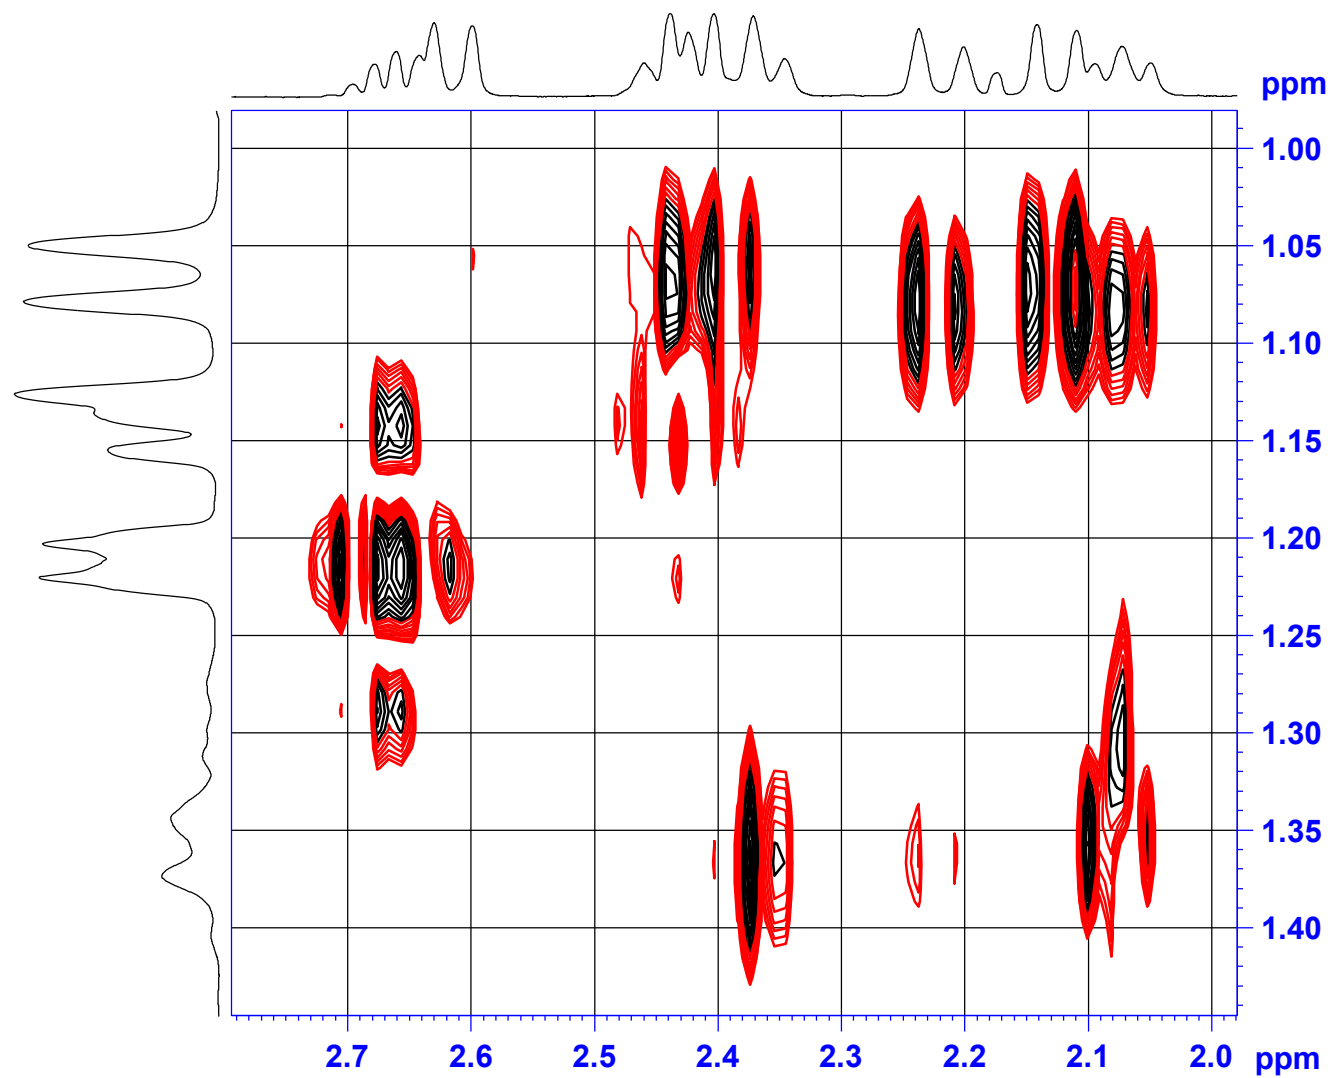



<sup>1</sup>H NMR (400 MHz) spectrum of Krishnolide A (1) in DMSO-d<sub>6</sub>

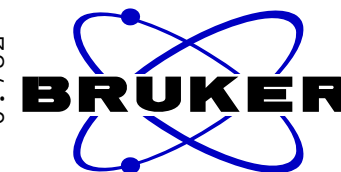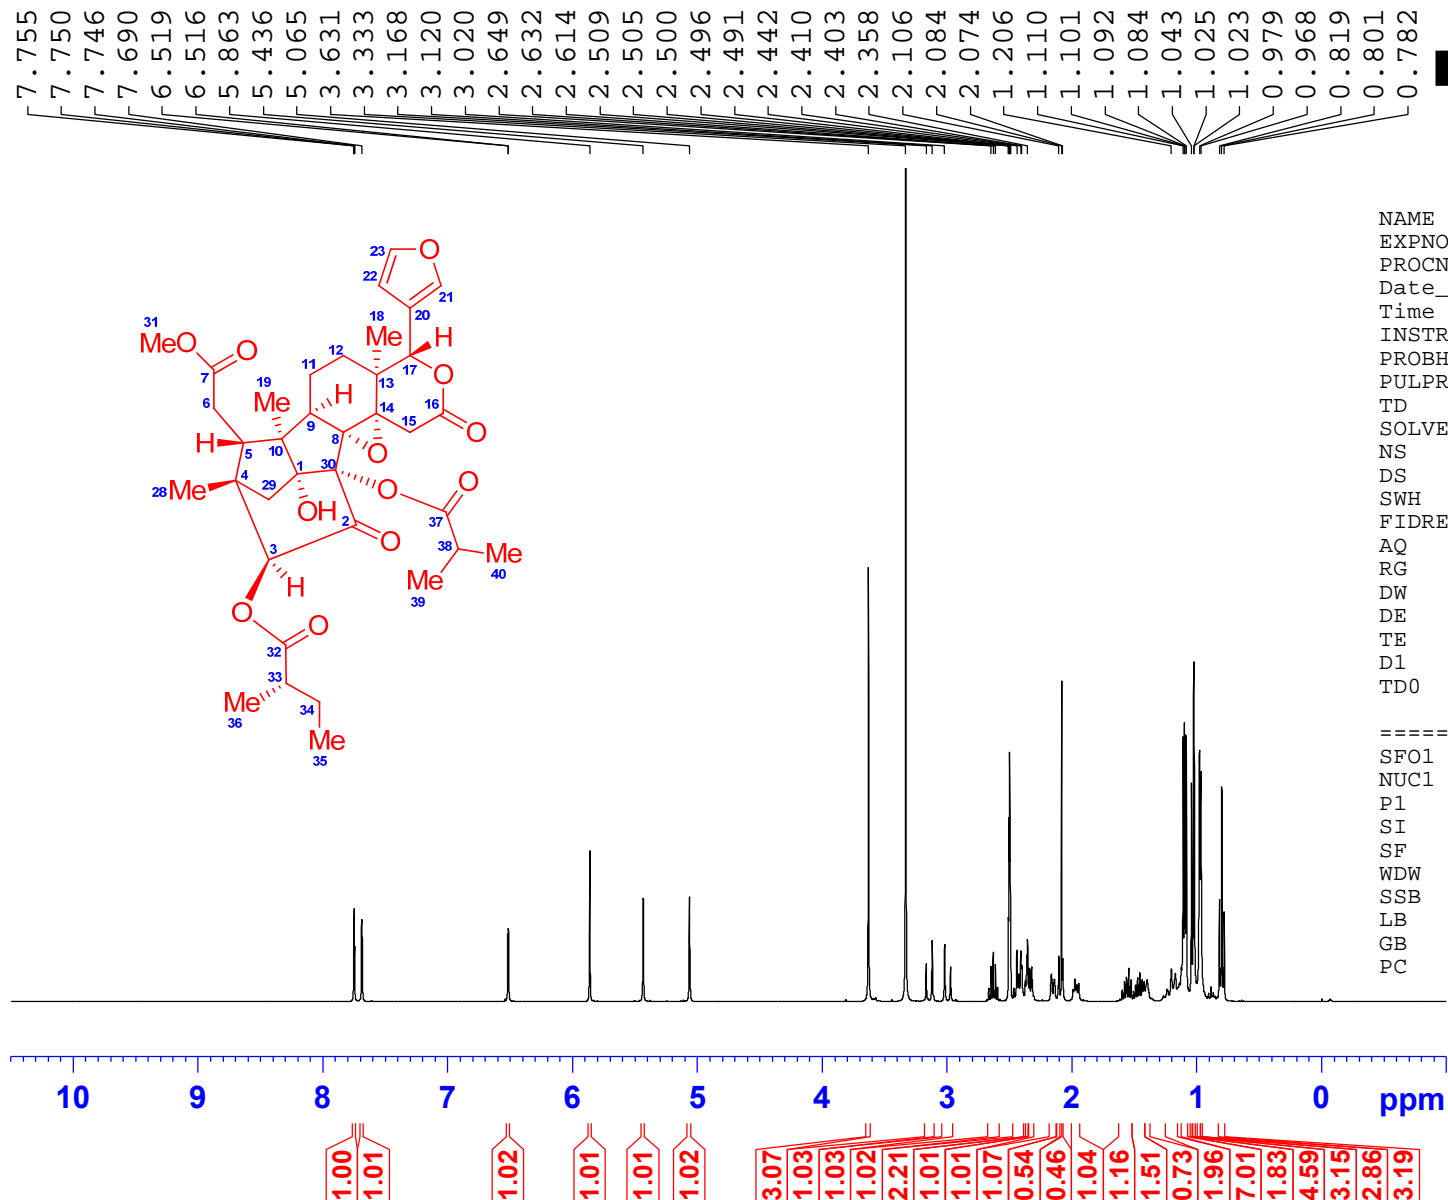

```

NAME          ZQ-17-DMSO
EXPNO         1
PROCNO       1
Date_        20170705
Time         23.12
INSTRUM      spect
PROBHD       5 mm CPPBBO BB
PULPROG      zg30
TD           65536
SOLVENT      DMSO
NS           16
DS           2
SWH          8223.685 Hz
FIDRES       0.125483 Hz
AQ           3.9846387 sec
RG           102.3
DW           60.800 usec
DE           10.00 usec
TE           297.0 K
D1           1.0000000 sec
TD0          1
    
```

```

===== CHANNEL f1 =====
SFO1         400.1324710 MHz
NUC1         1H
P1           11.50 usec
SI           65536
SF           400.1300031 MHz
WDW          EM
SSB          0
LB           0.30 Hz
GB           0
PC           1.00
    
```

$^1\text{H}$  NMR (400 MHz) spectrum of Krishnolide A (**1**) in  $\text{DMSO-}d_6$

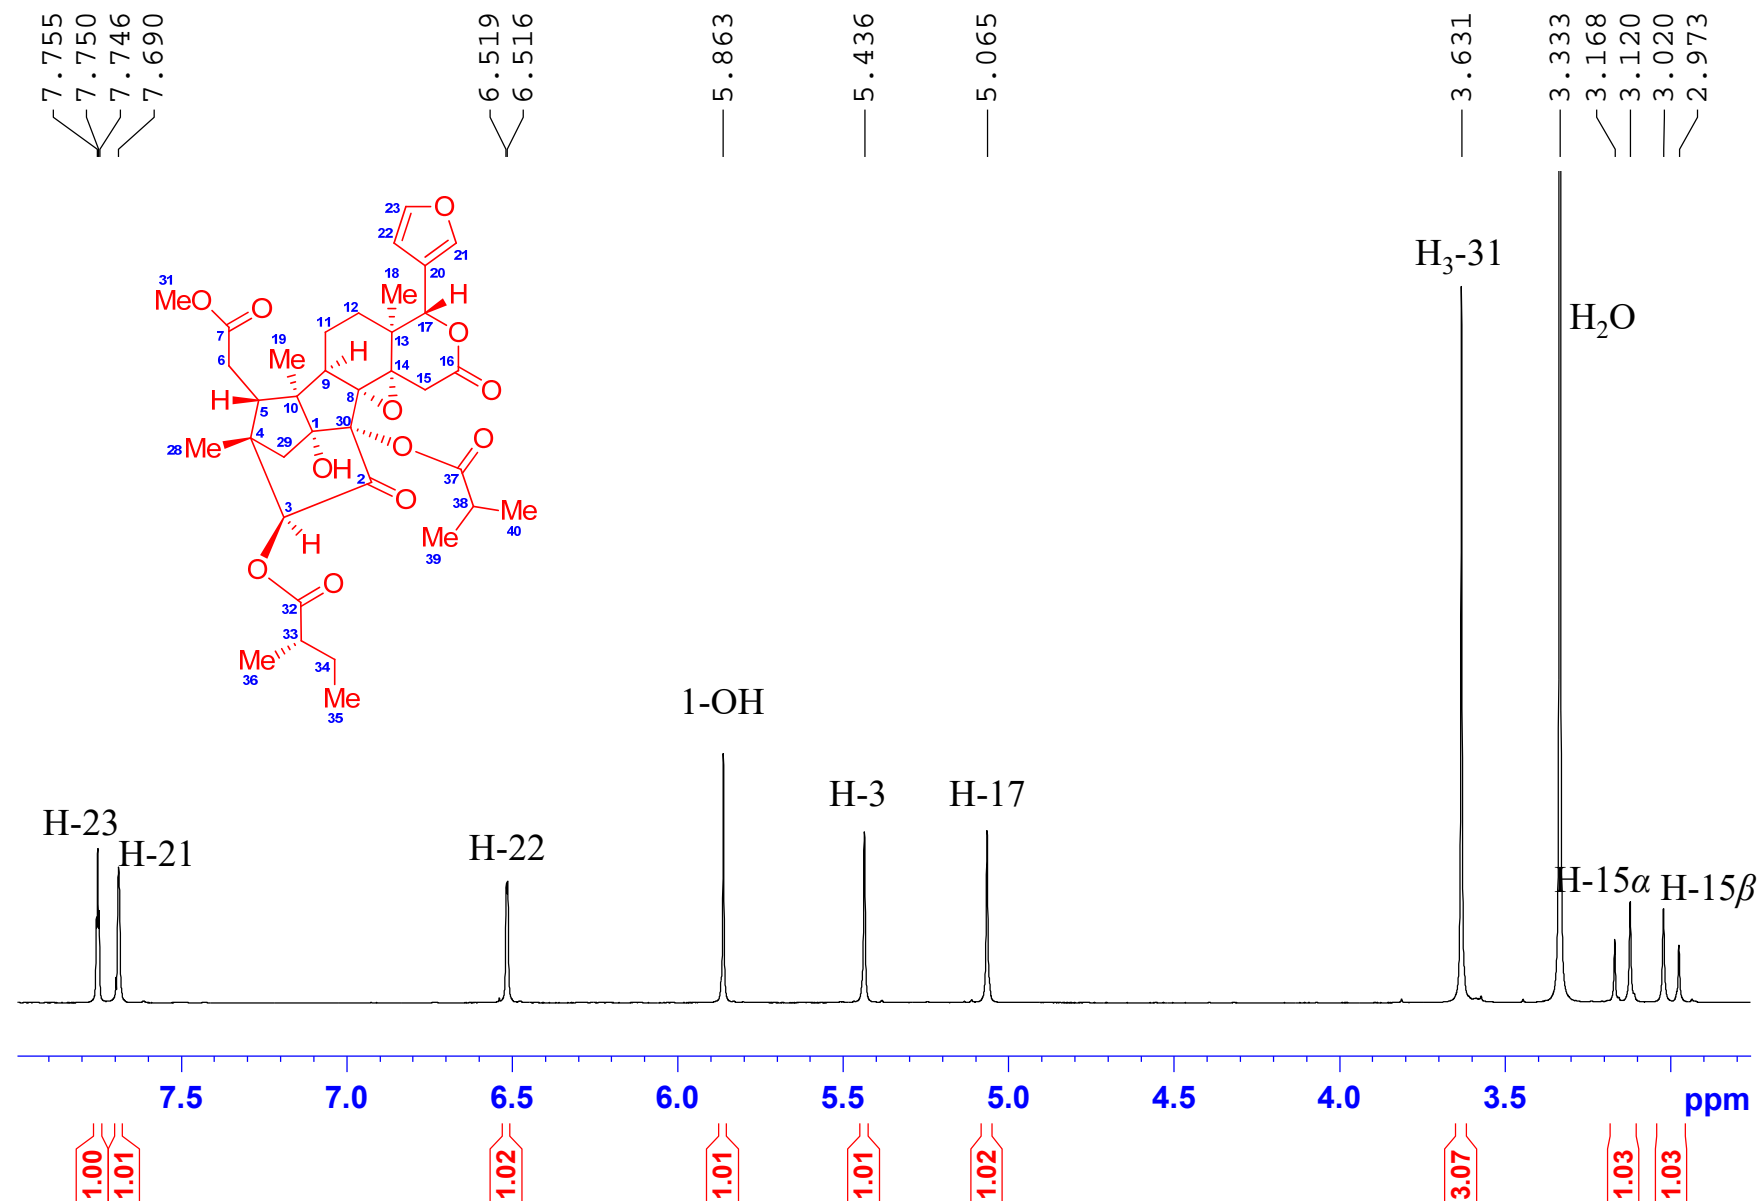

$^1\text{H}$  NMR (400 MHz) spectrum of Krishnolide A (**1**) in  $\text{DMSO-}d_6$

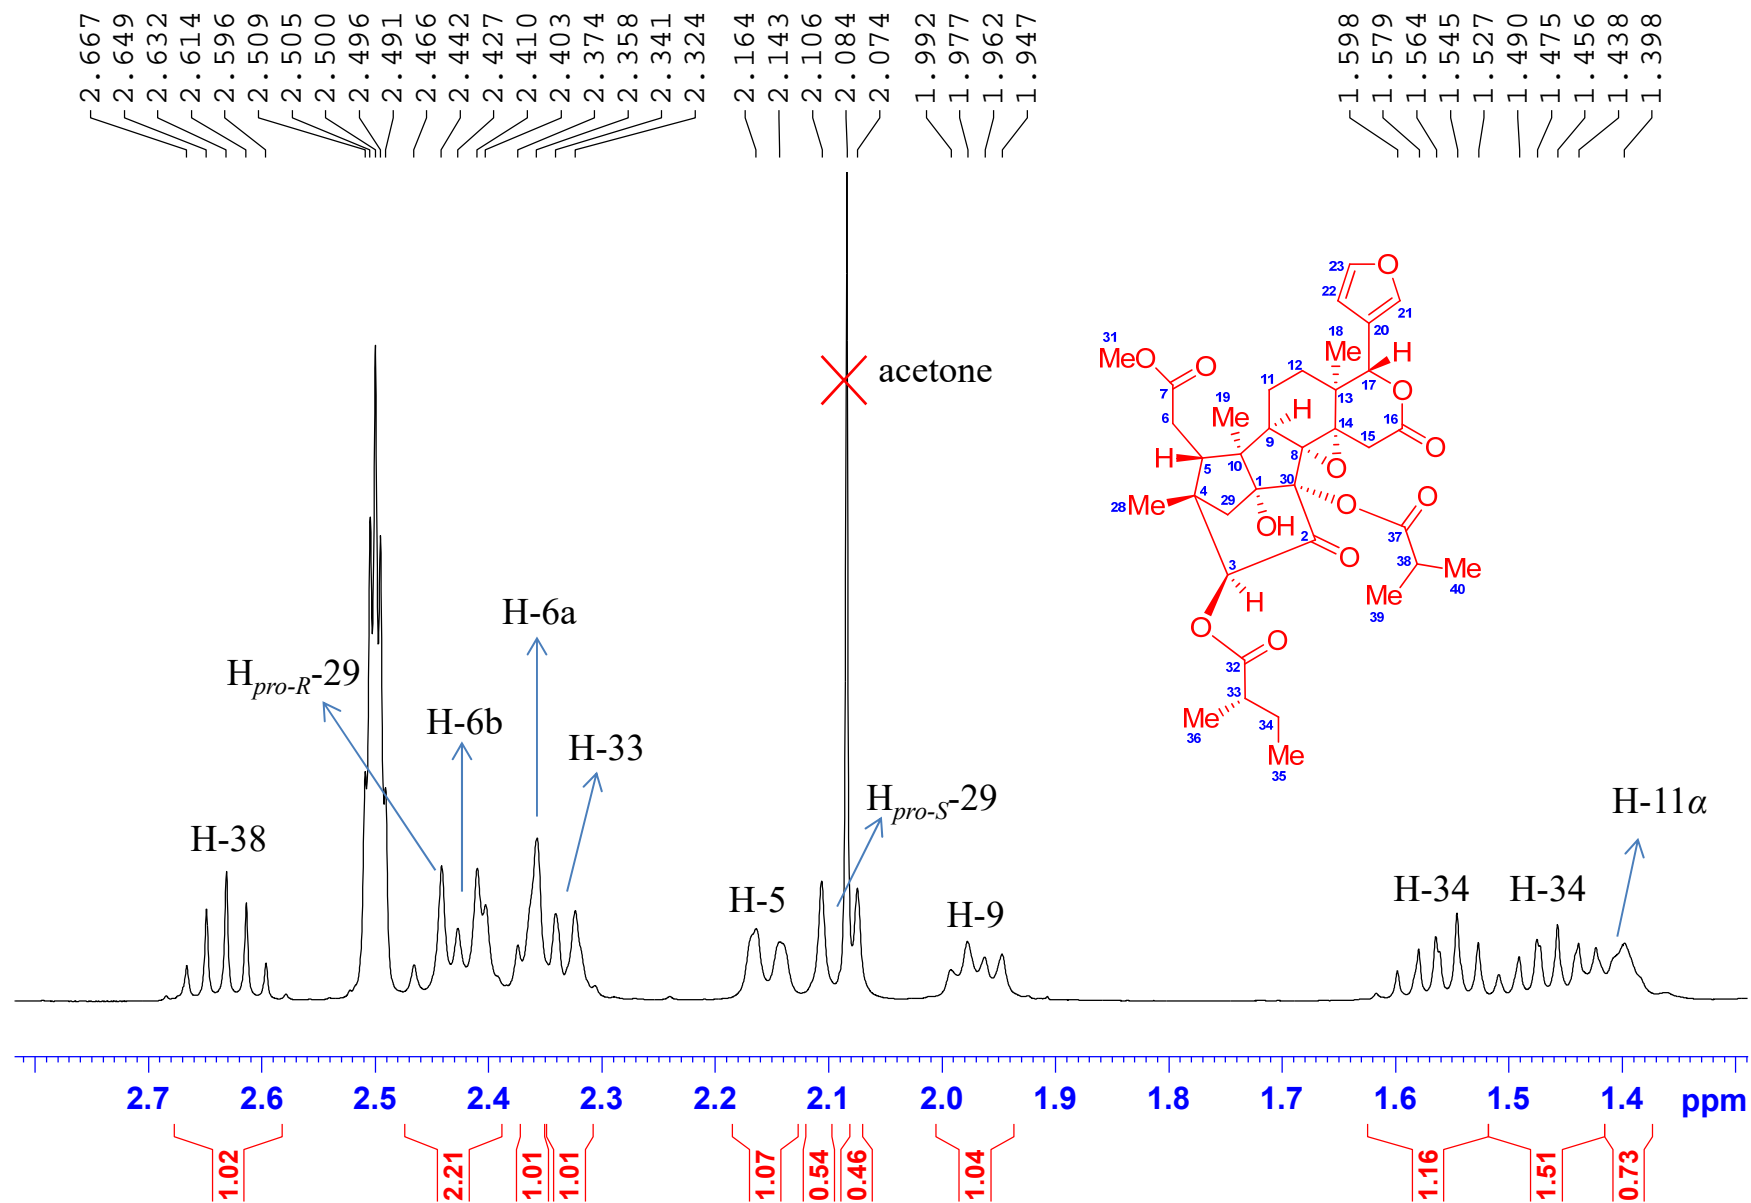

$^1\text{H}$  NMR (400 MHz) spectrum of Krishnolide A (**1**) in  $\text{DMSO-}d_6$

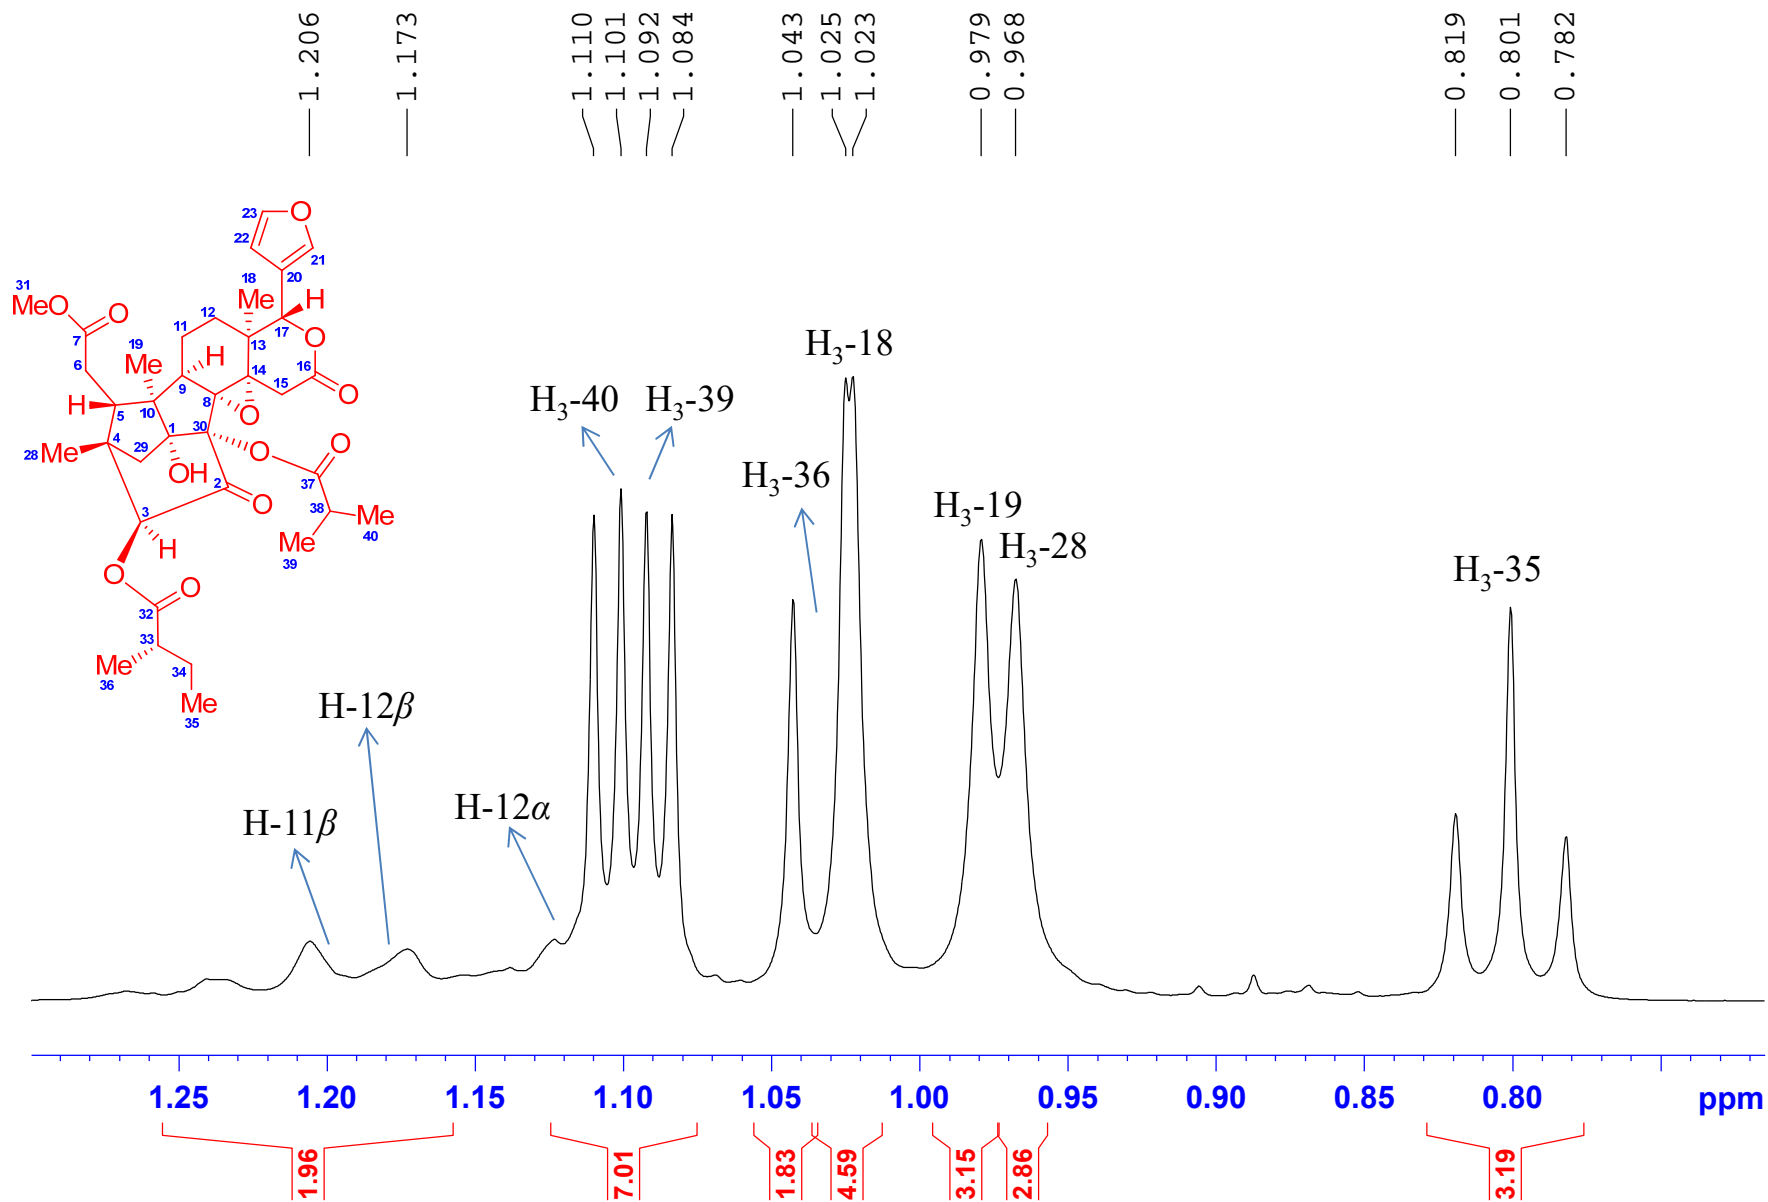

<sup>13</sup>C NMR (100 MHz) spectrum of Krishnolide A (1) in DMSO-d<sub>6</sub>

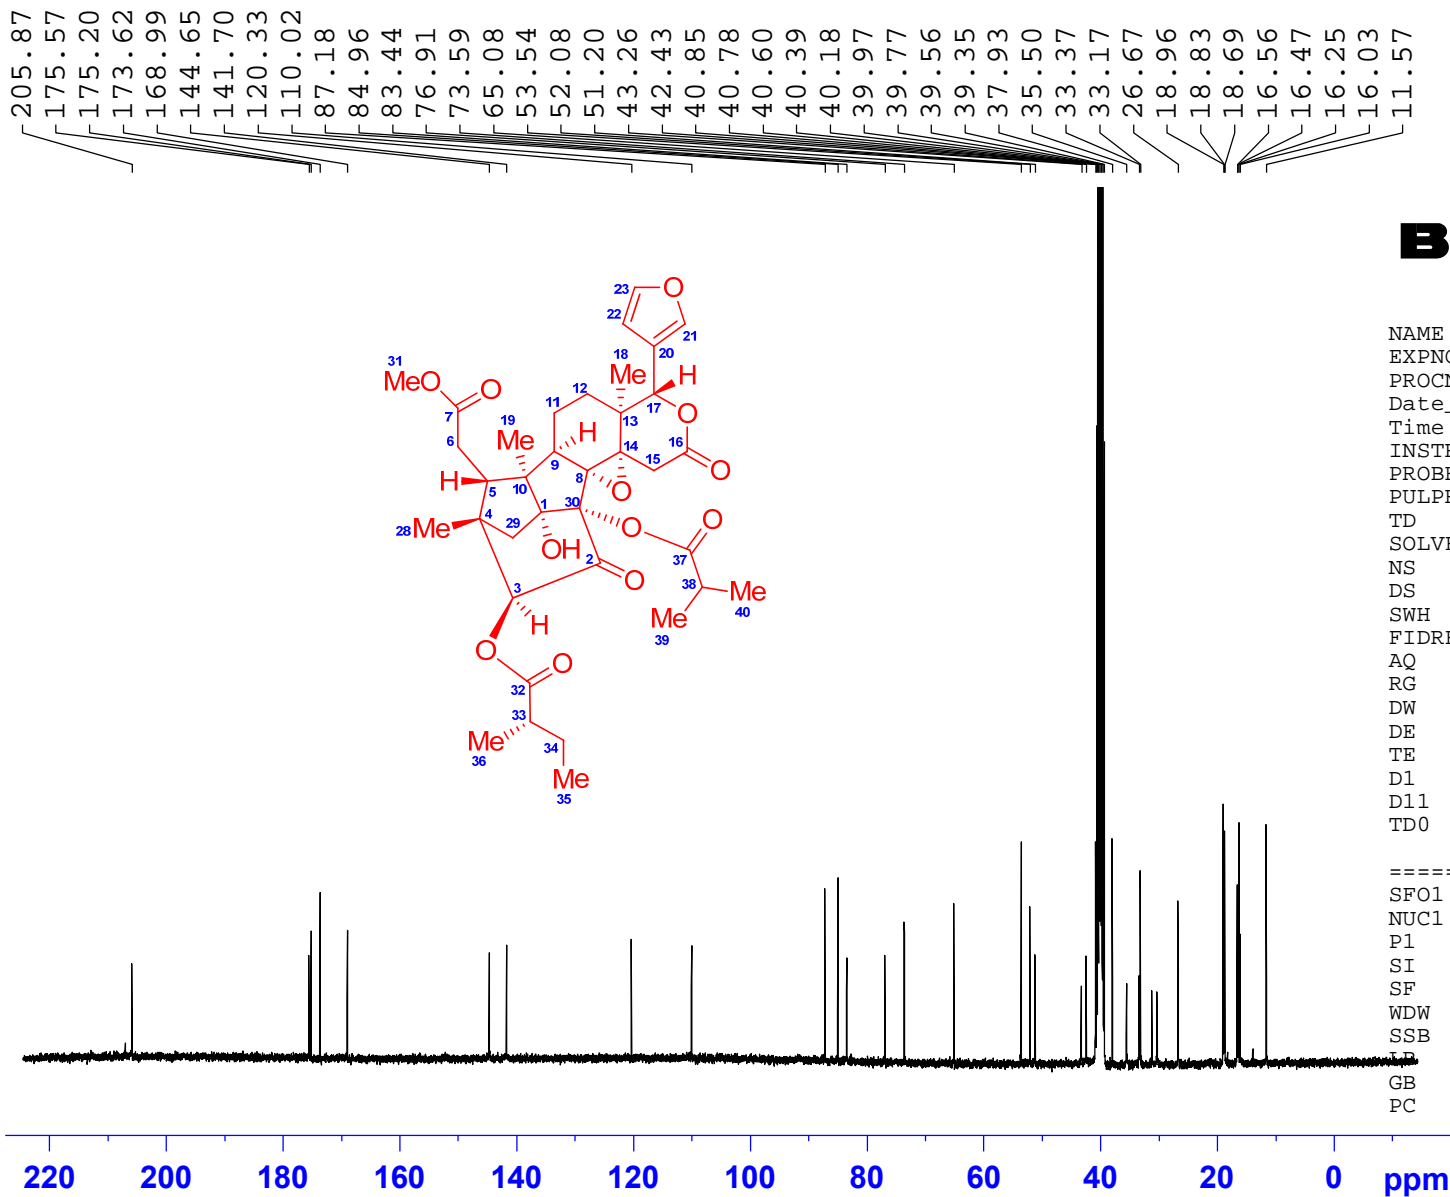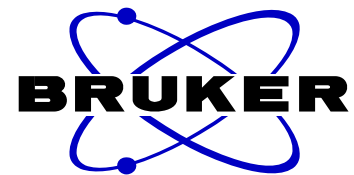

```

NAME          ZQ-17-DMSO
EXPNO         2
PROCNO        1
Date_         20170706
Time          0.12
INSTRUM       spect
PROBHD        5 mm CPPBBO BB
PULPROG       zgpg30
TD            65536
SOLVENT       DMSO
NS            1024
DS            4
SWH           24038.461 Hz
FIDRES        0.366798 Hz
AQ            1.3631988 sec
RG            117.37
DW            20.800 usec
DE            18.00 usec
TE            297.0 K
D1            2.00000000 sec
D11           0.03000000 sec
TD0           1
    
```

```

===== CHANNEL f1 =====
SFO1         100.623324 MHz
NUC1         13C
P1           10.00 usec
SI           32768
SF           100.6127685 MHz
WDW          EM
SSB          0
GB           1.00 Hz
PC           1.40
    
```

$^{13}\text{C}$  NMR (100 MHz) spectrum of Krishnolide A (**1**) in  $\text{DMSO-}d_6$

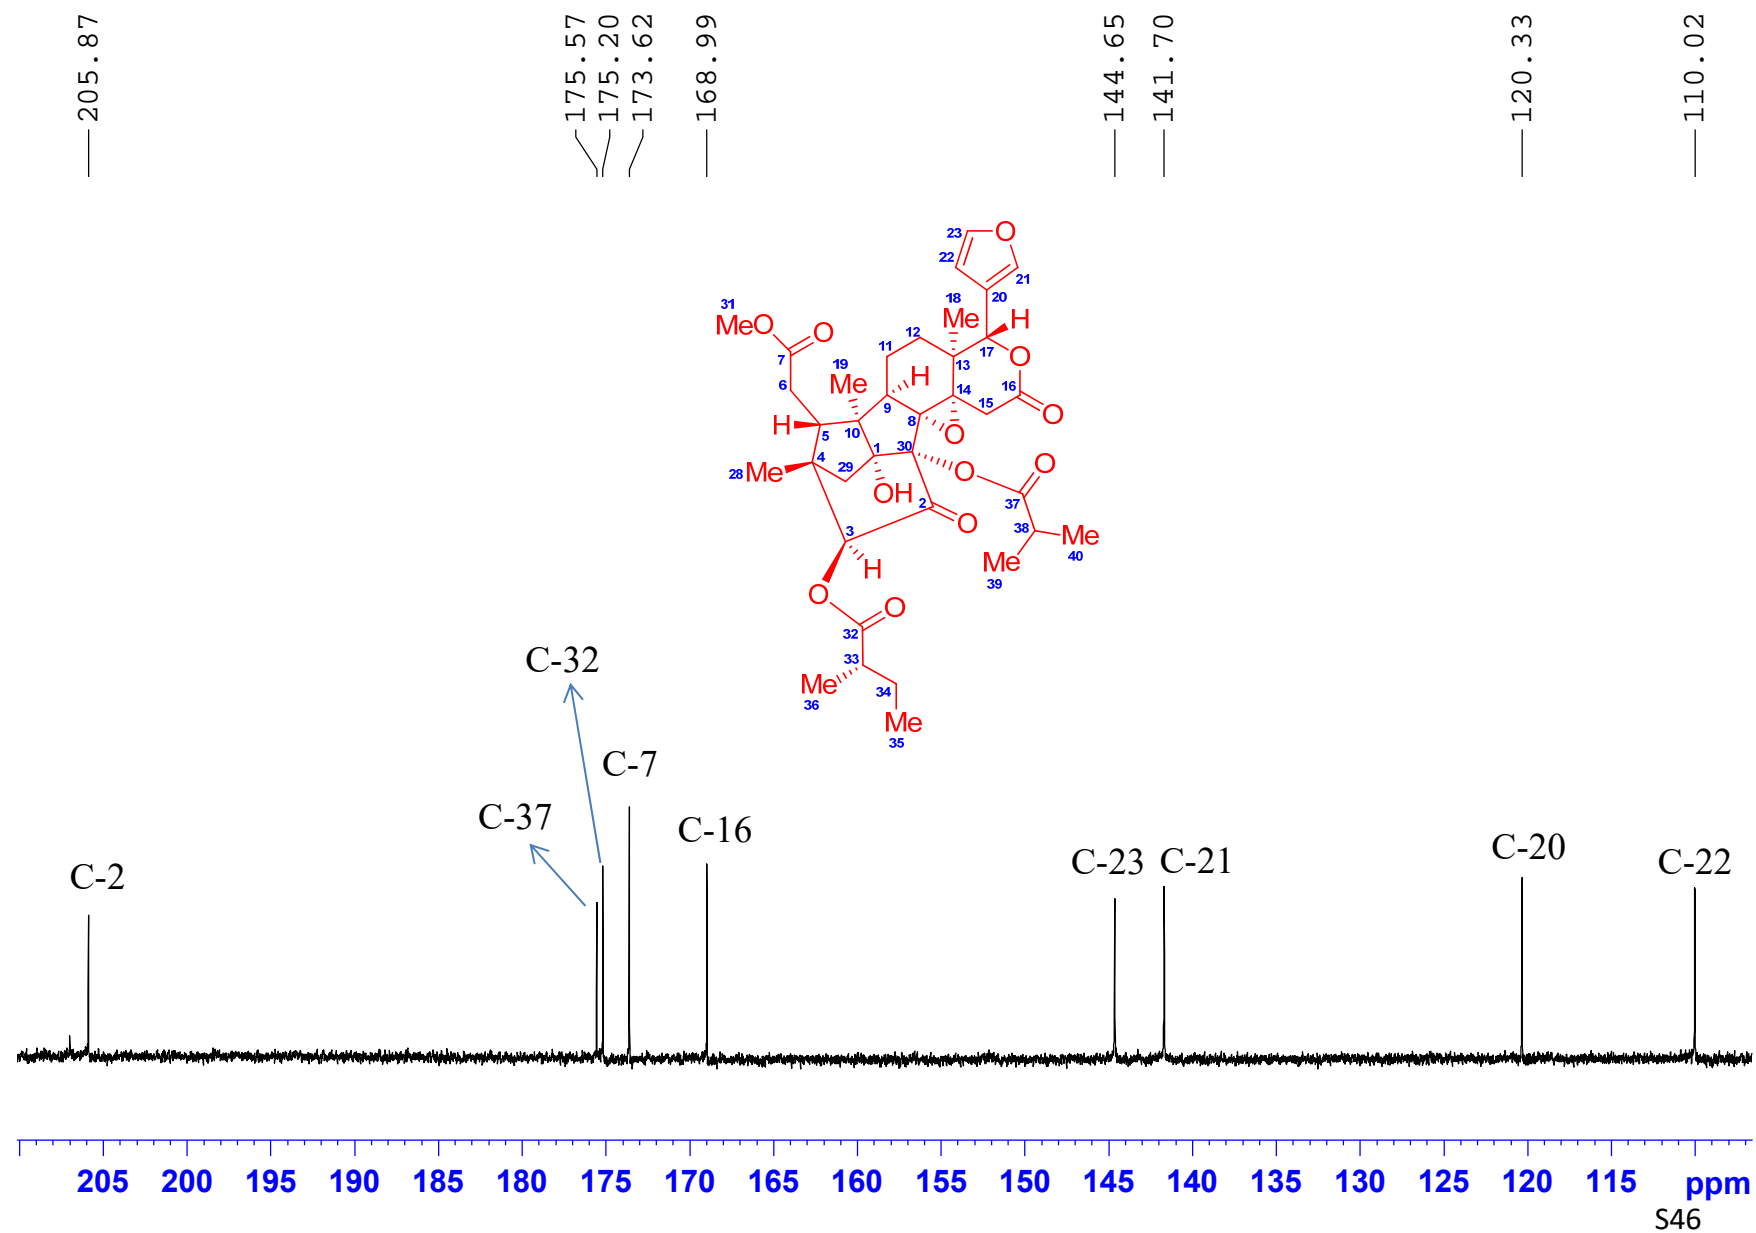

$^{13}\text{C}$  NMR (100 MHz) spectrum of Krishnolide A (**1**) in  $\text{DMSO-}d_6$

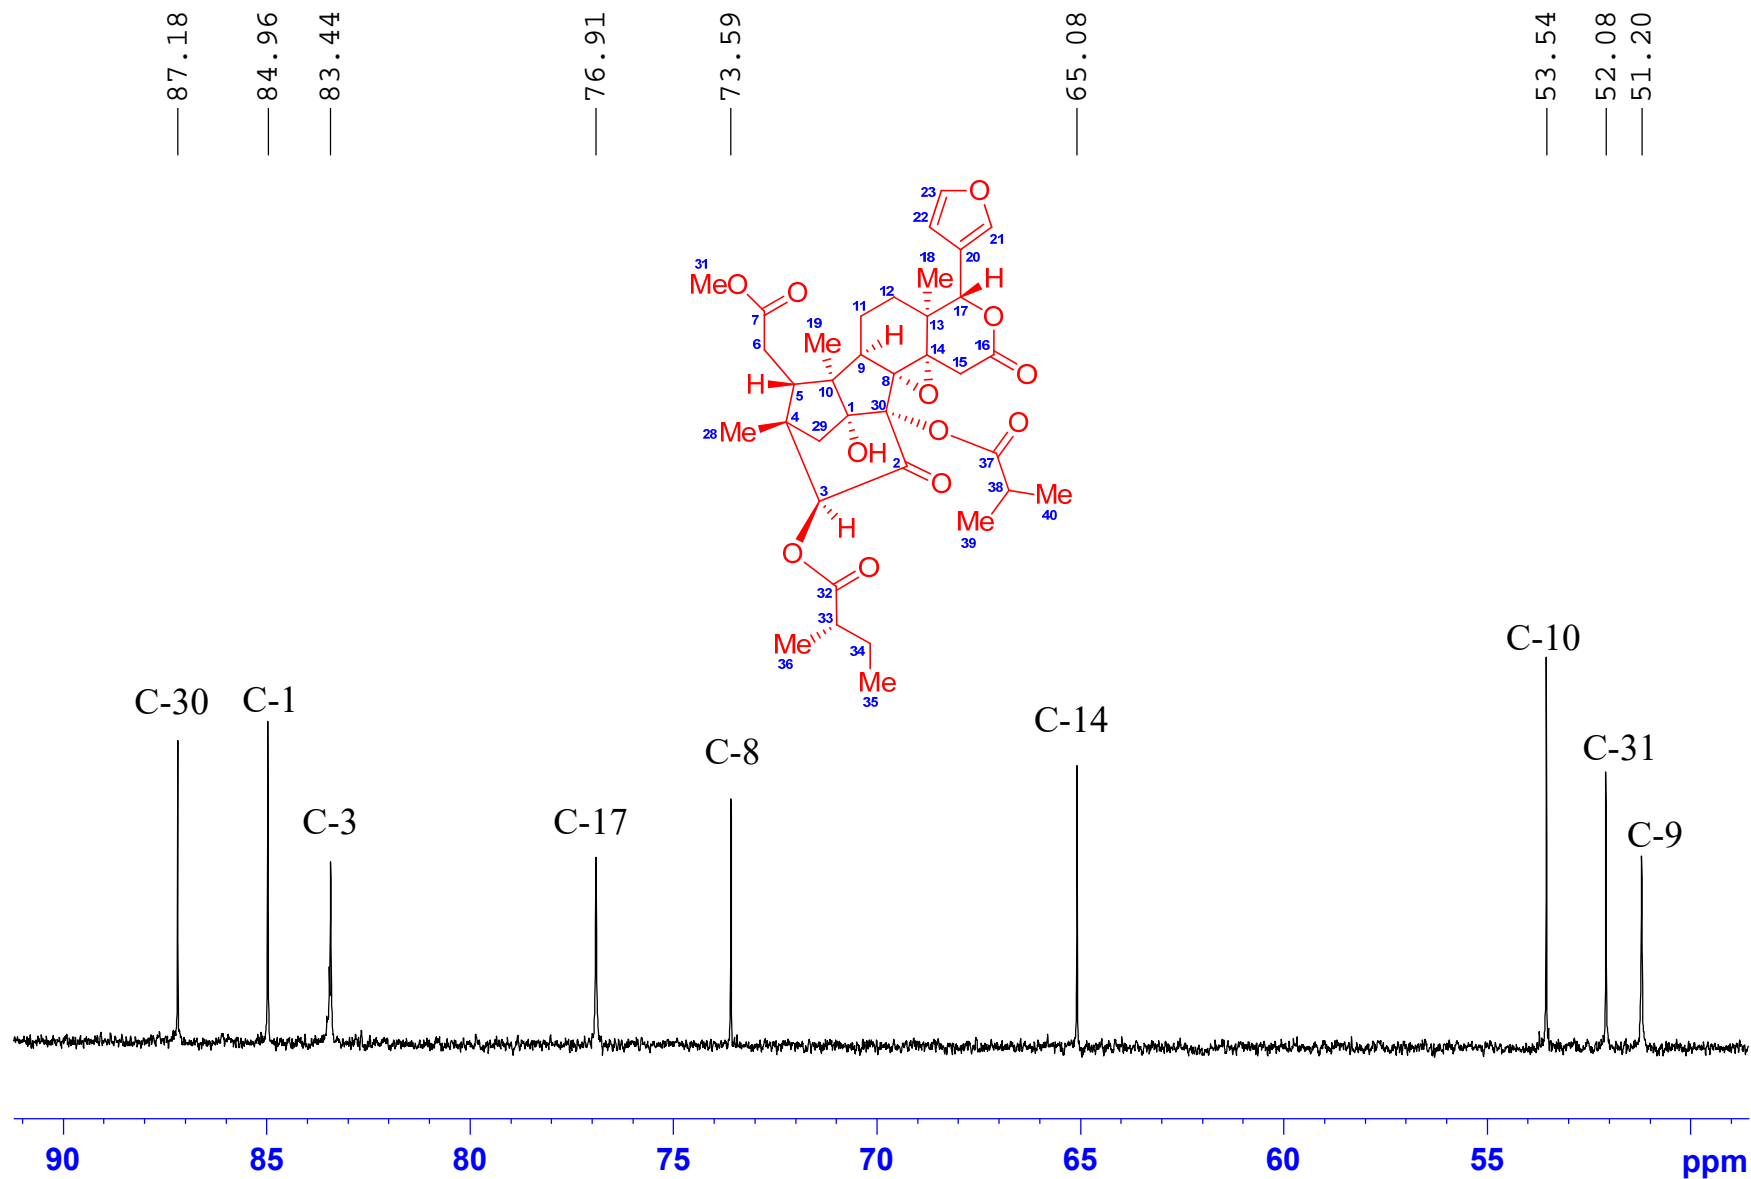

$^{13}\text{C}$  NMR (100 MHz) spectrum of Krishnolide A (**1**) in  $\text{DMSO-}d_6$

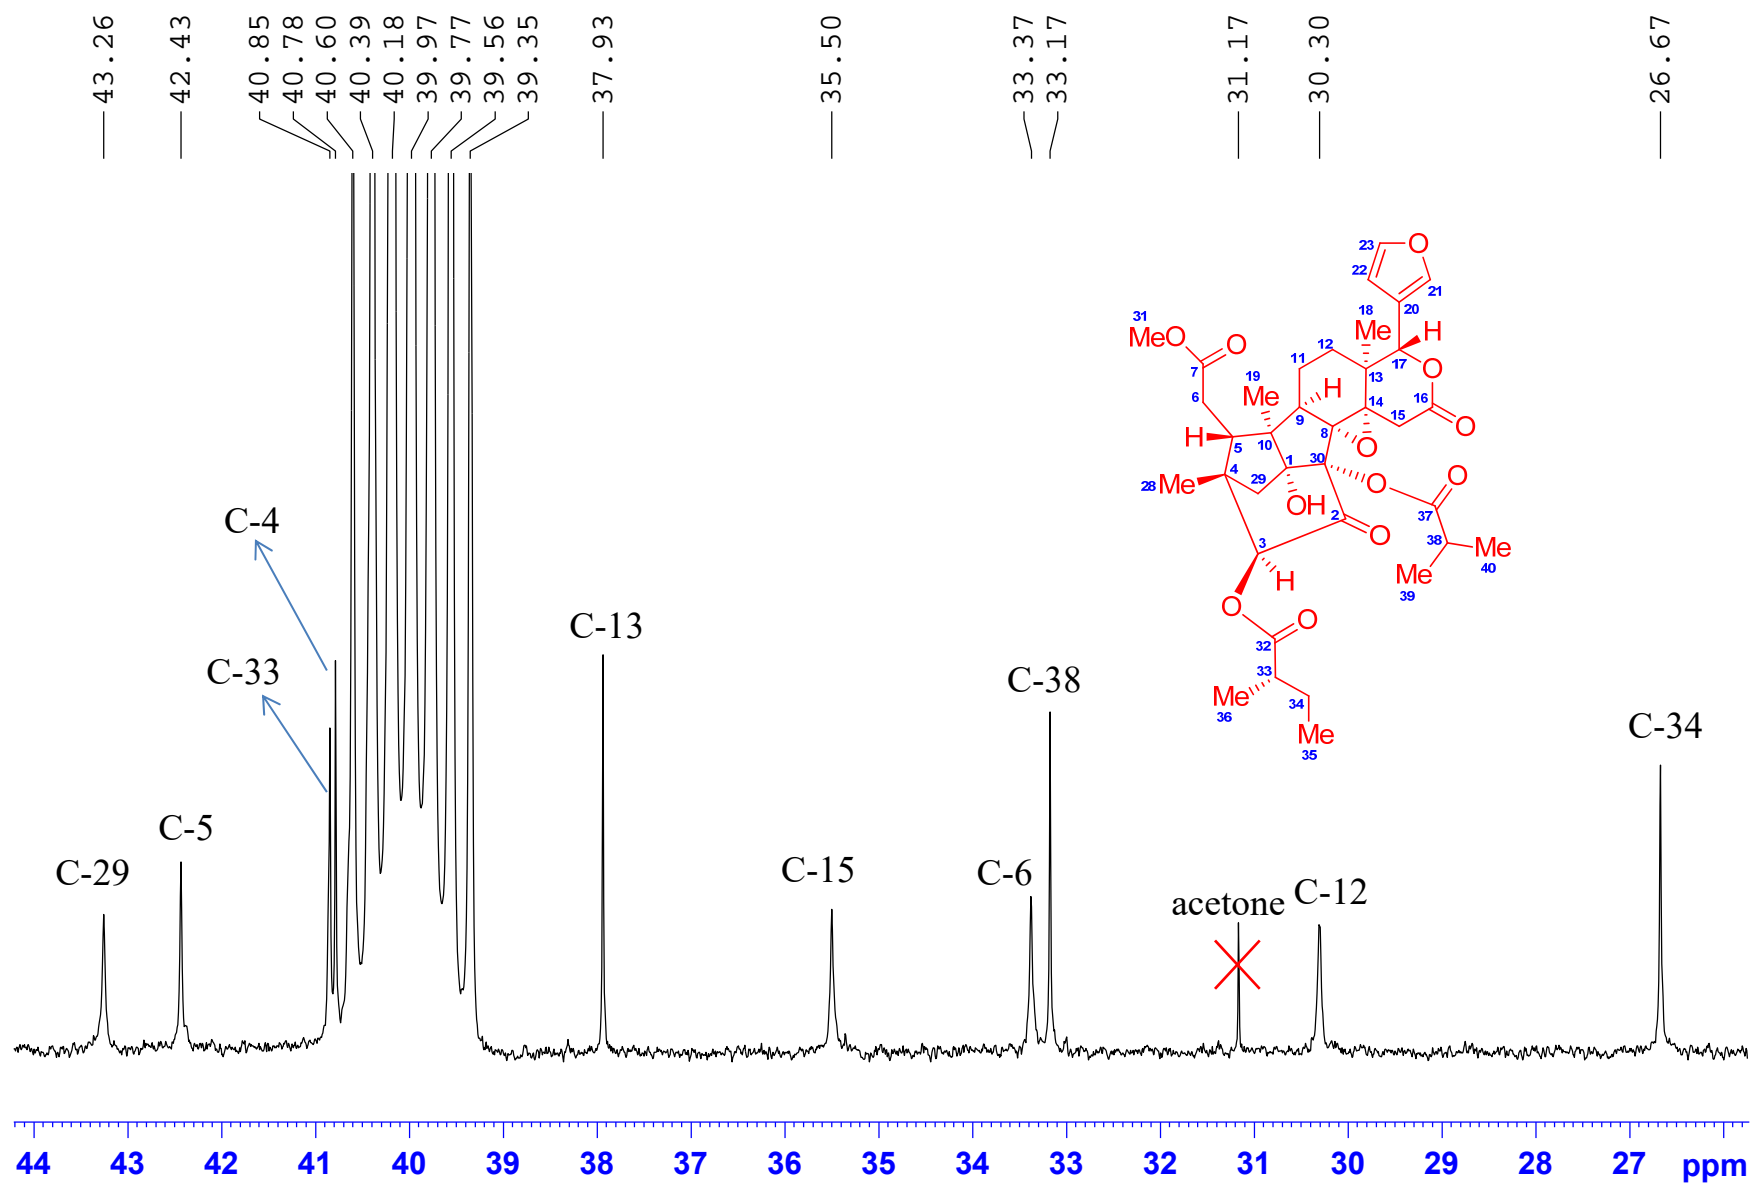



$^{13}\text{C}$  NMR (100 MHz) spectrum of Krishnolide A (**1**) in  $\text{DMSO-}d_6$

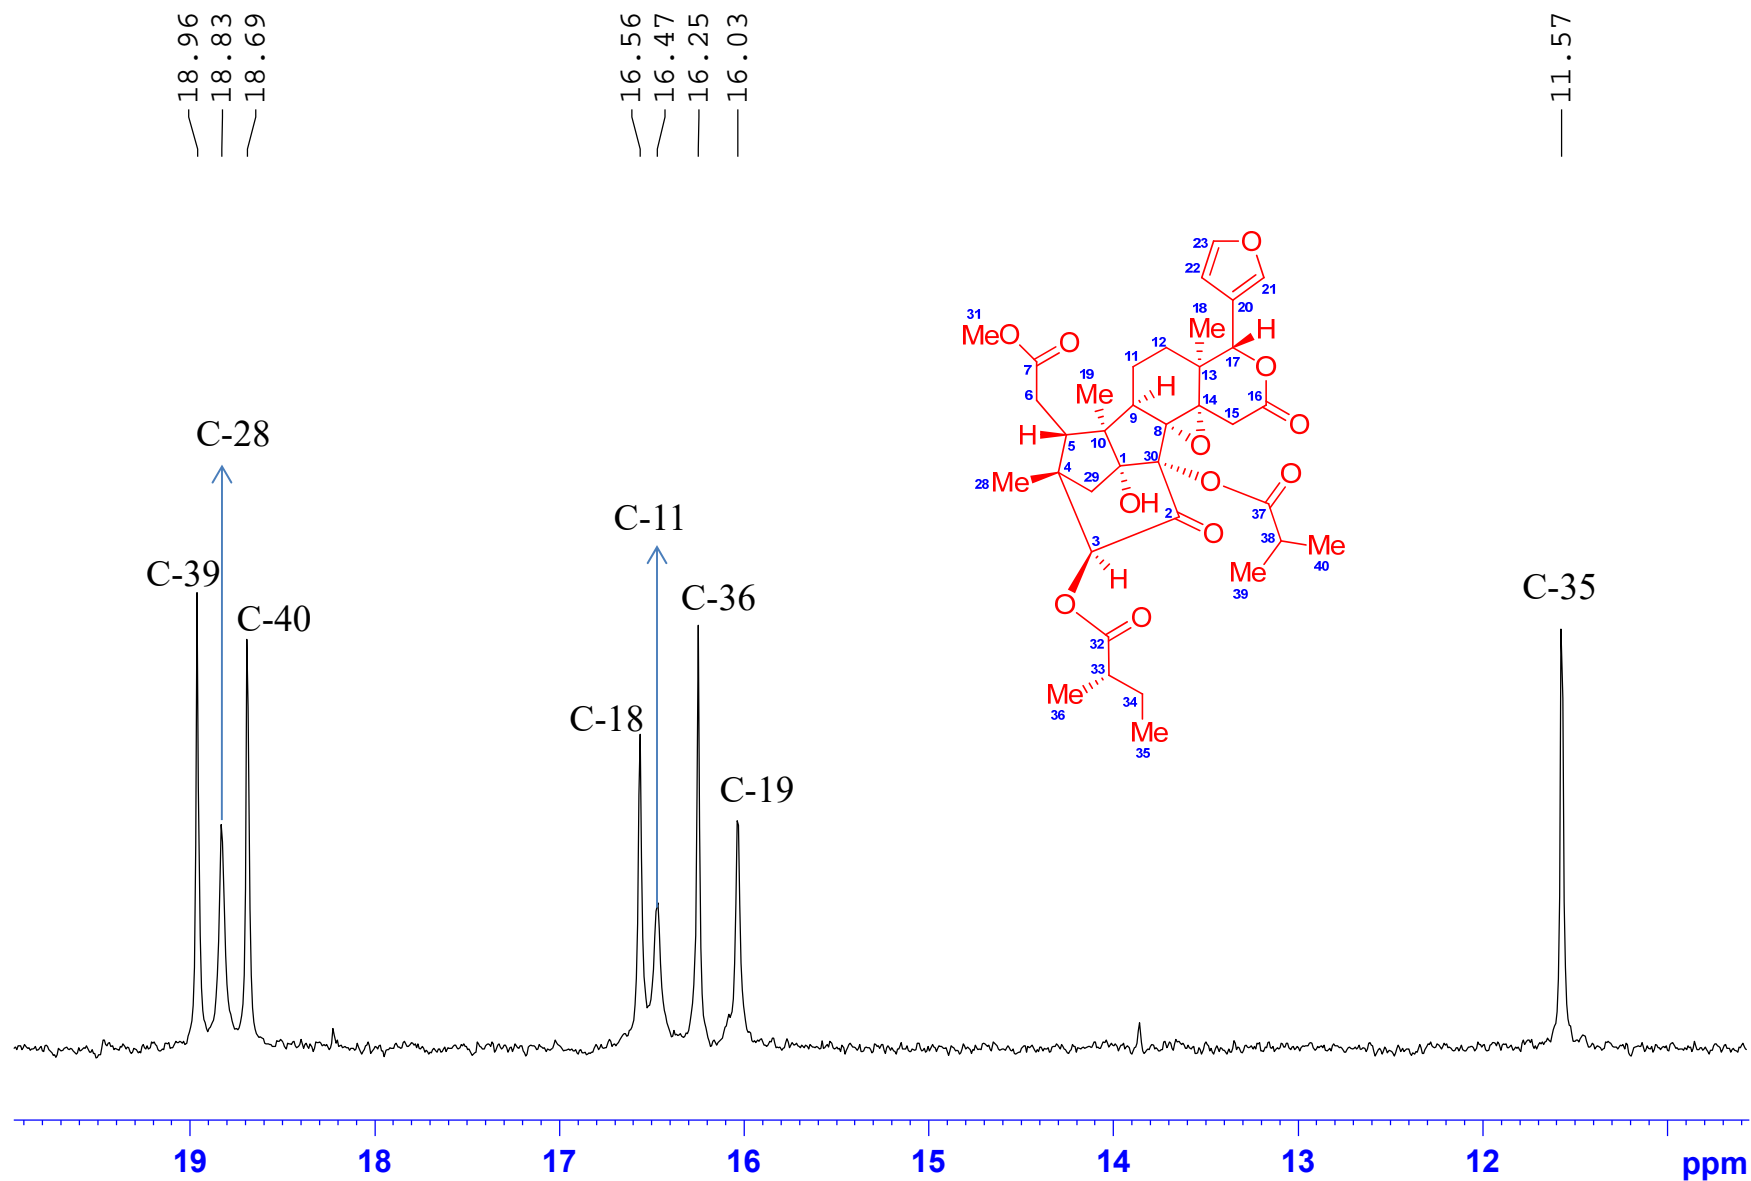

# DEPT 135 spectrum of Krishnolide A (1) in DMSO-*d*<sub>6</sub>

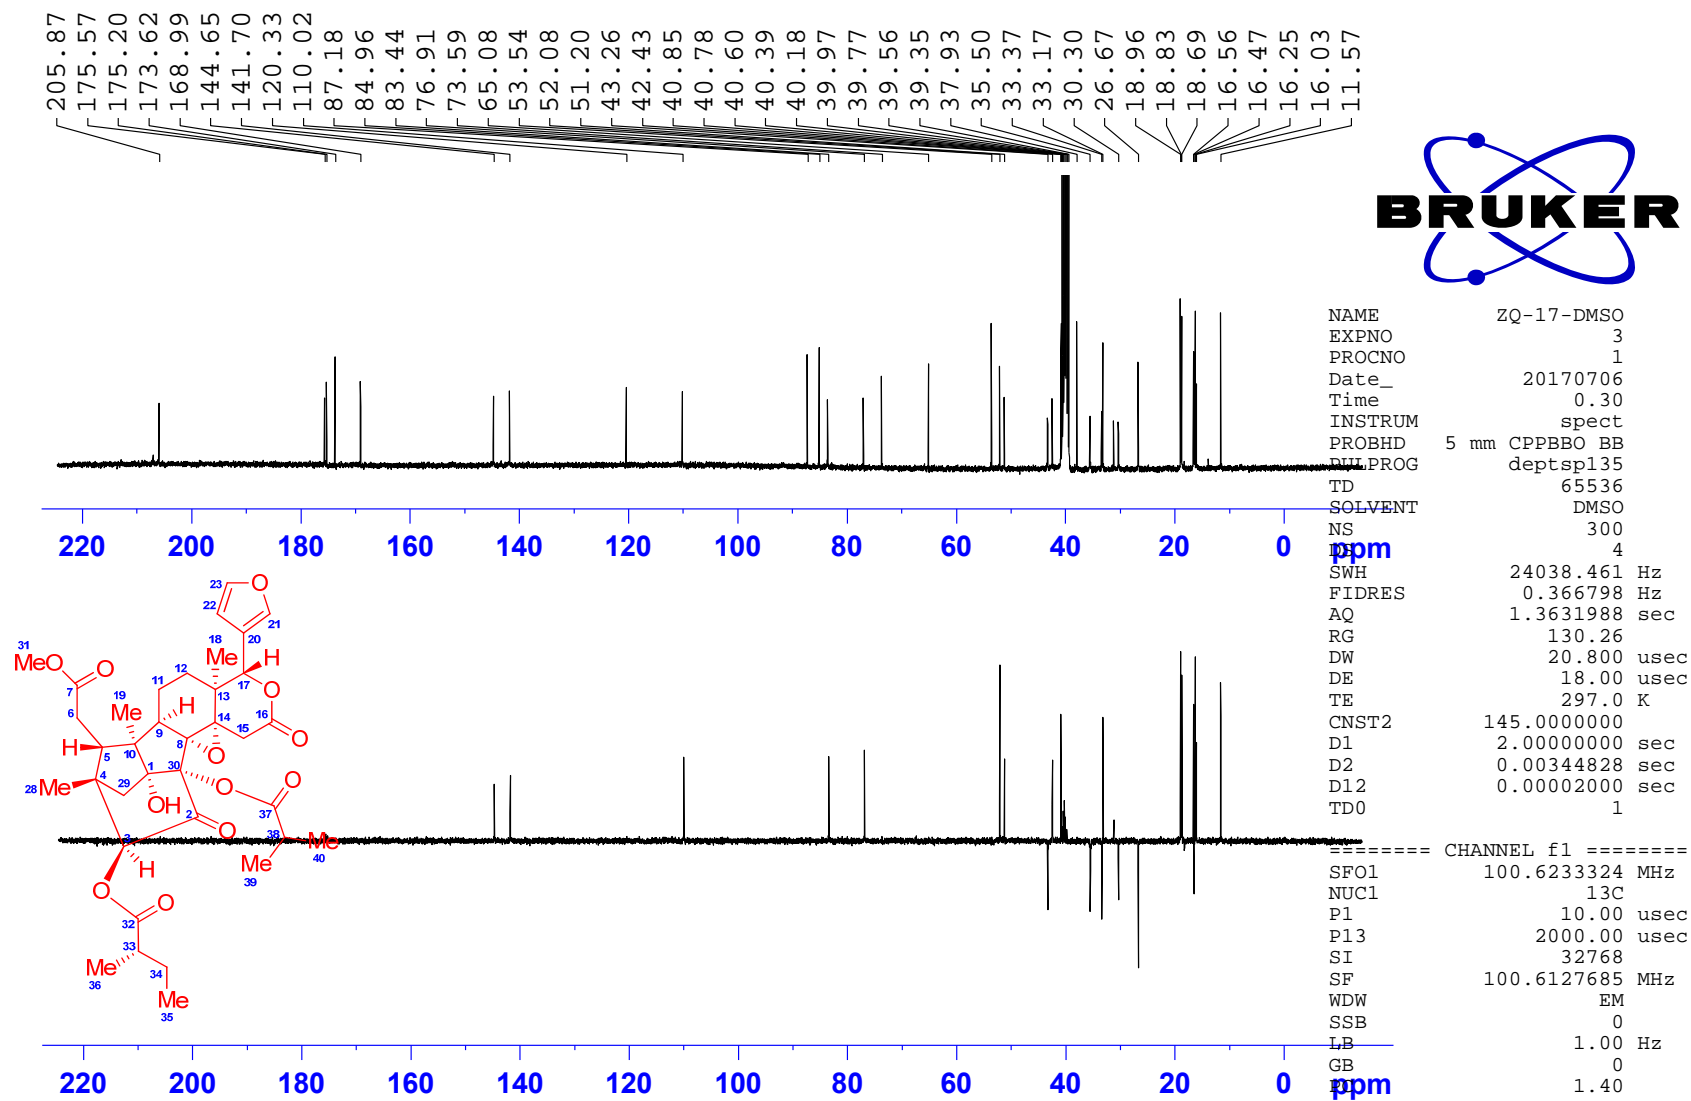

# DEPT 135 spectrum of Krishnolide A (1) in DMSO- $d_6$

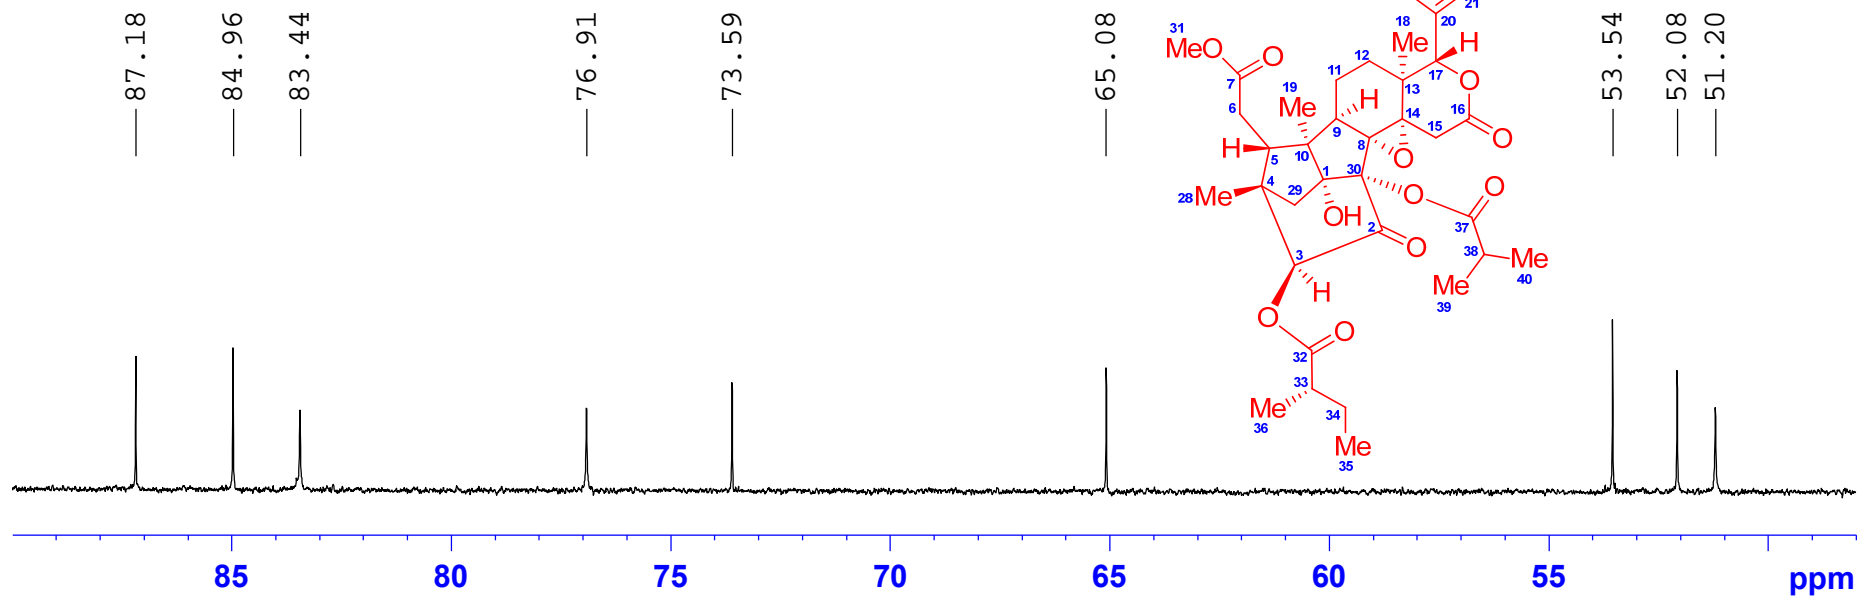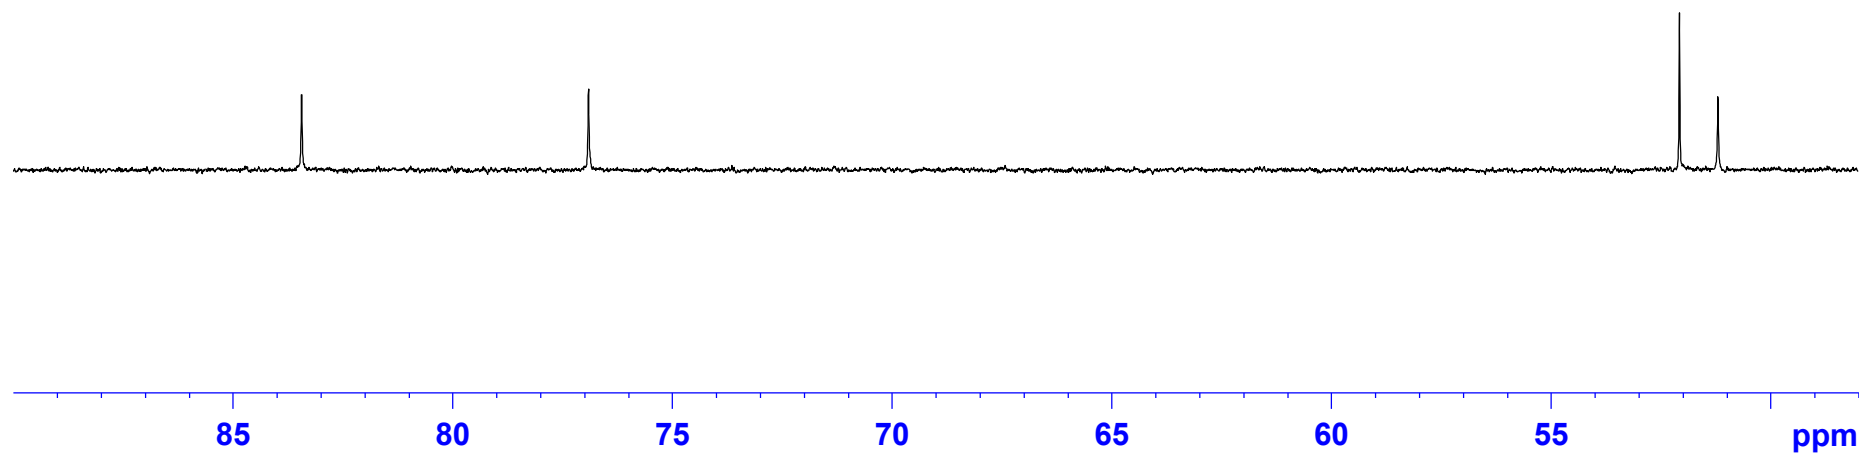

# DEPT 135 spectrum of Krishnolide A (1) in DMSO- $d_6$

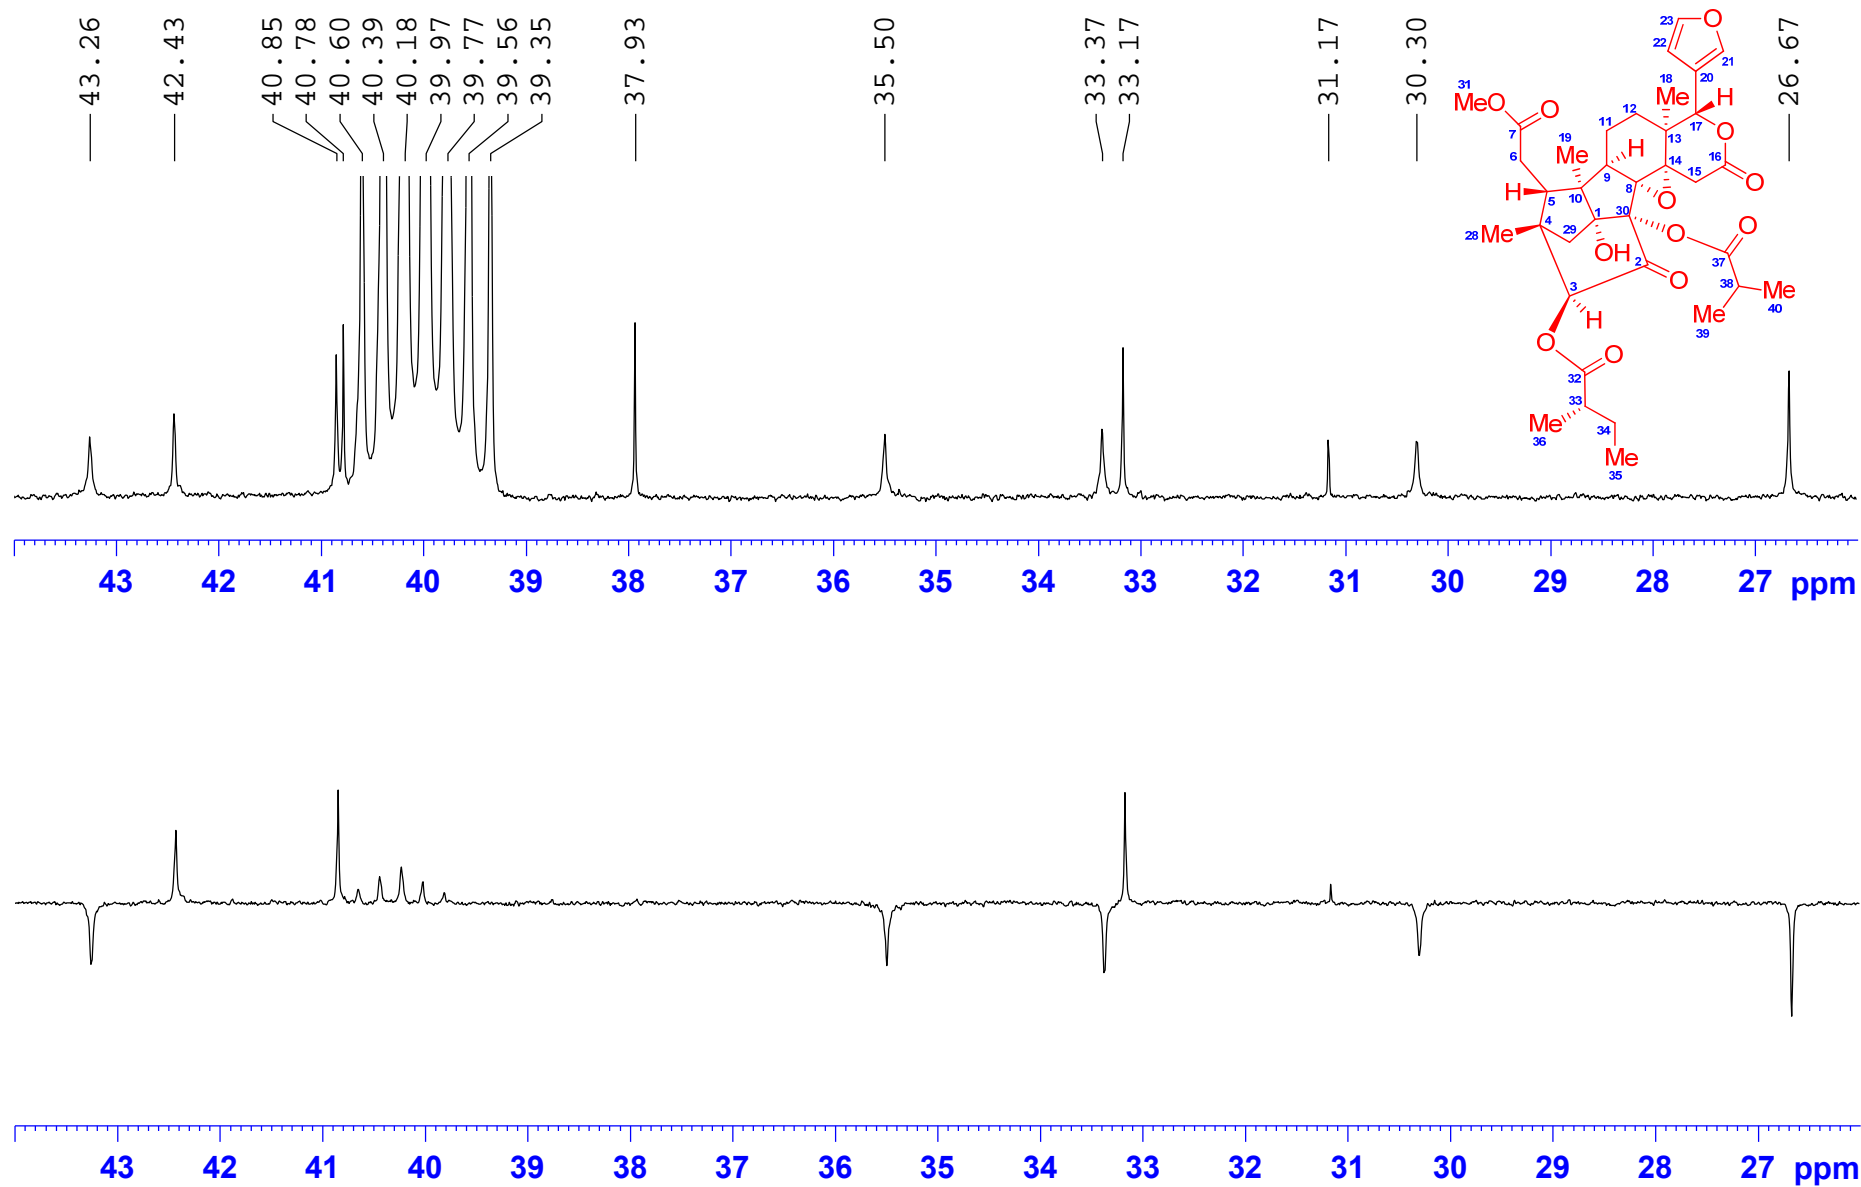

# DEPT 135 spectrum of Krishnolide A (1) in DMSO- $d_6$

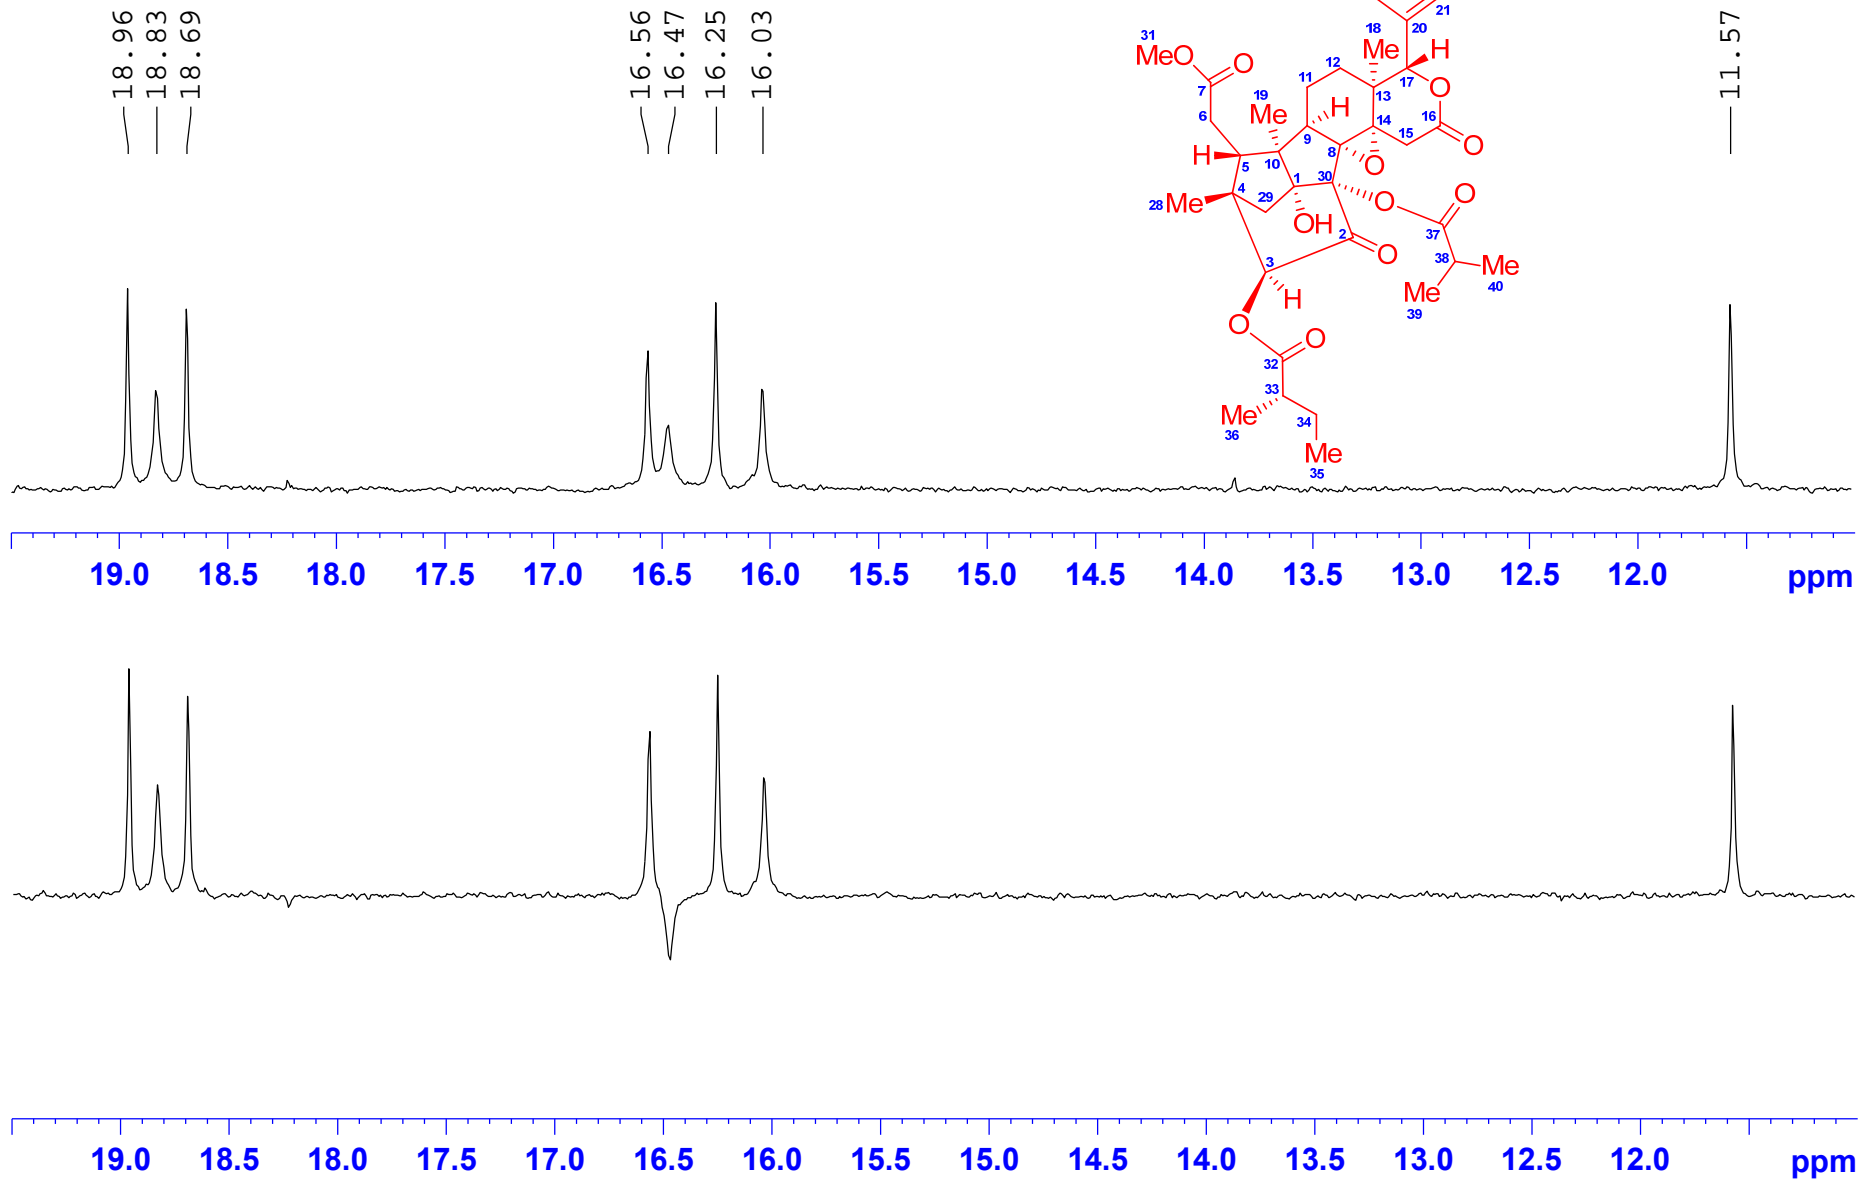

# $^1\text{H}$ - $^1\text{H}$ COSY spectrum of Krishnolide A (1) in $\text{DMSO-}d_6$

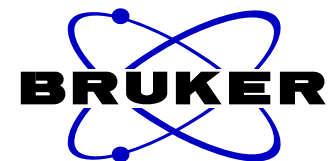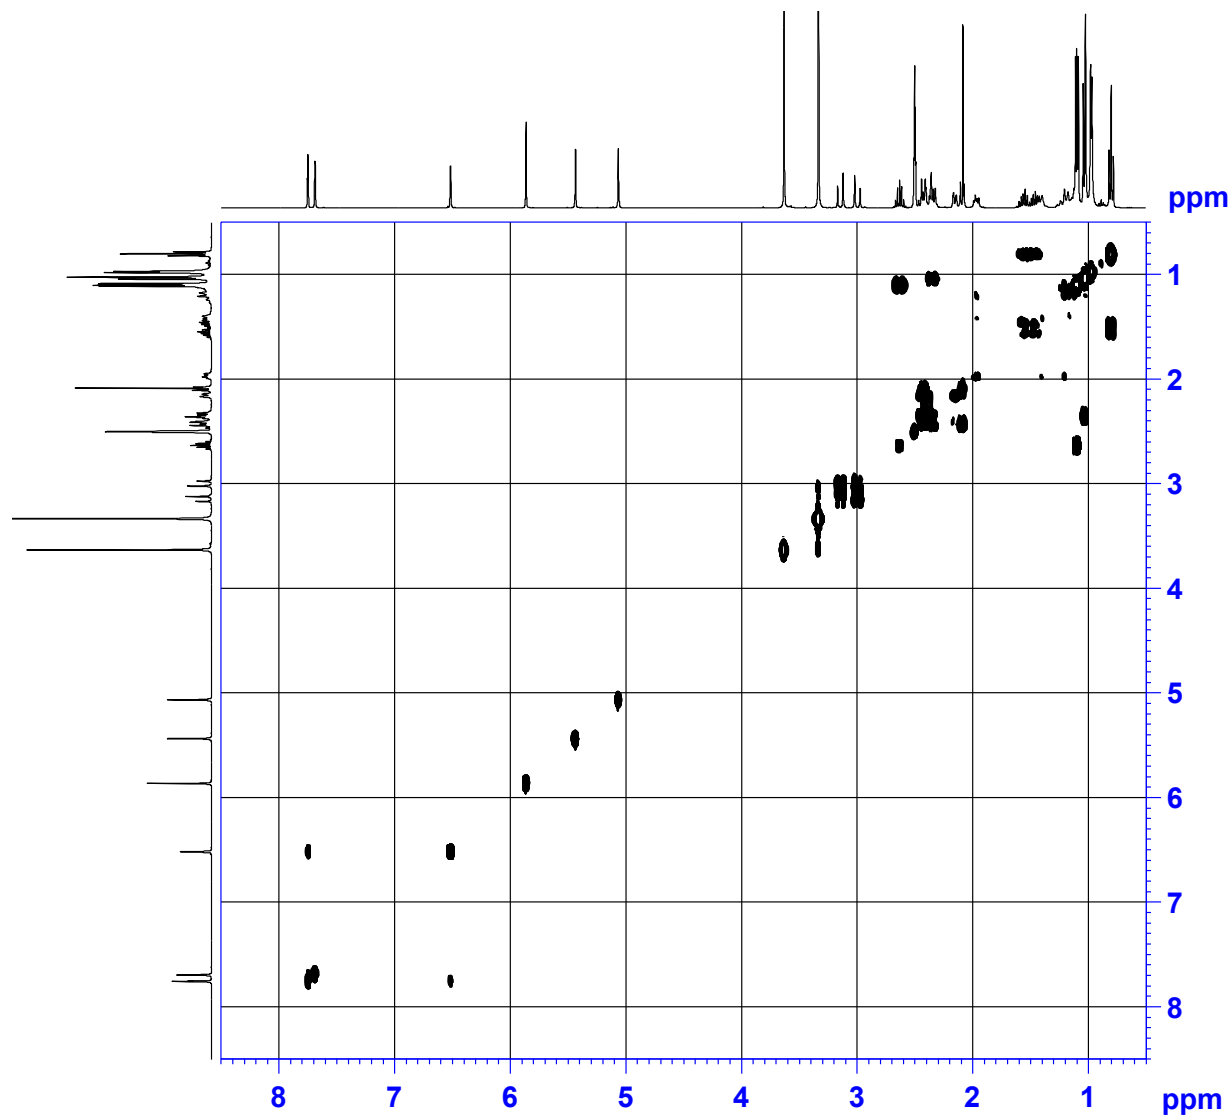

```

NAME           ZQ-17-DMSO
EXPNO          4
PROCNO         1
Date_          20170706
Time           0.31
INSTRUM        spect
PROBHD         5 mm CPPBBO BB
PULPROG        cosygpppgf
TD             2048
SOLVENT        DMSO
NS             8
DS             8
SWH            3906.250 Hz
FIDRES         1.907349 Hz
AQ             0.2621940 sec
RG             171.57
DW             128.000 usec
DE             10.00 usec
TE             297.0 K
D0             0.00000300 sec
D1             1.89678097 sec
D11            0.03000000 sec
D12            0.00002000 sec
D13            0.00000400 sec
D16            0.00020000 sec
IN0            0.00025600 sec
    
```

```

===== CHANNEL f1 =====
SF01          400.1318006 MHz
NUC1           1H
P0             11.50 usec
P1             11.50 usec
P17           2500.00 usec
ND0            1
TD             128
SF01          400.1318 MHz
FIDRES         30.517578 Hz
SW             9.762 ppm
FnMODE         QF
SI             1024
SF            400.1300018 MHz
WDW            QSINE
SSB            0
LB             0.00 Hz
GB             0
PC             1.40
SI             1024
MC2            QF
SF            400.1300002 MHz
WDW            QSINE
SSB            0
LB             0.00 Hz
GB             0
    
```

$^1\text{H}$ - $^1\text{H}$  COSY spectrum of Krishnolide A (**1**) in  $\text{DMSO-}d_6$

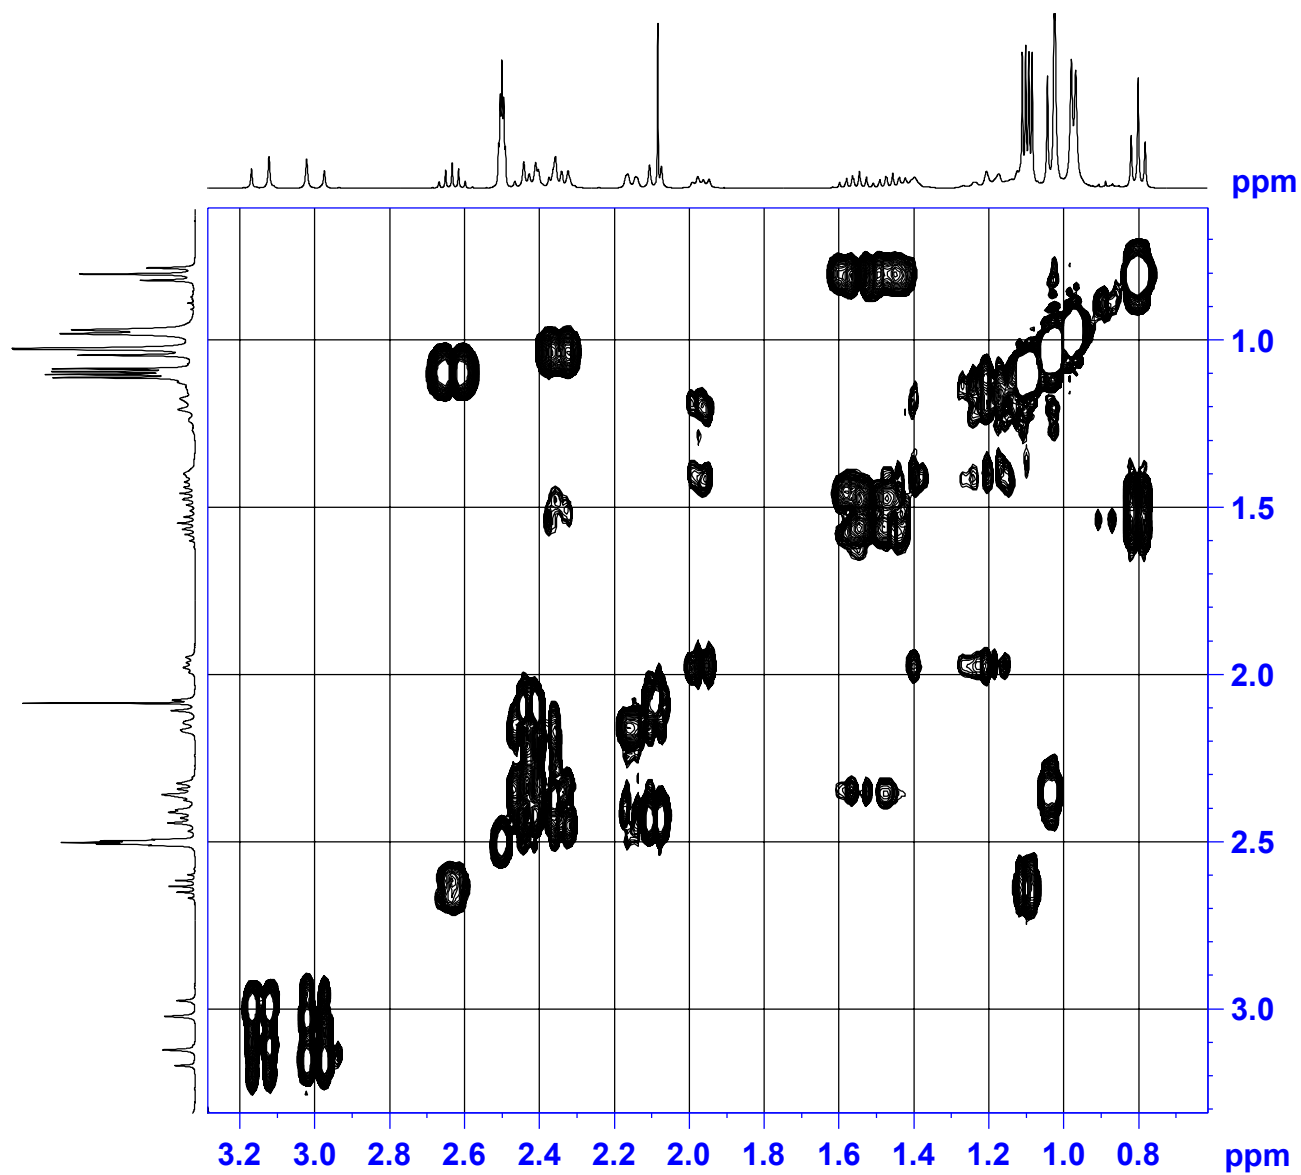

$^1\text{H}$ - $^1\text{H}$  COSY spectrum of Krishnolide A (**1**) in  $\text{DMSO-}d_6$

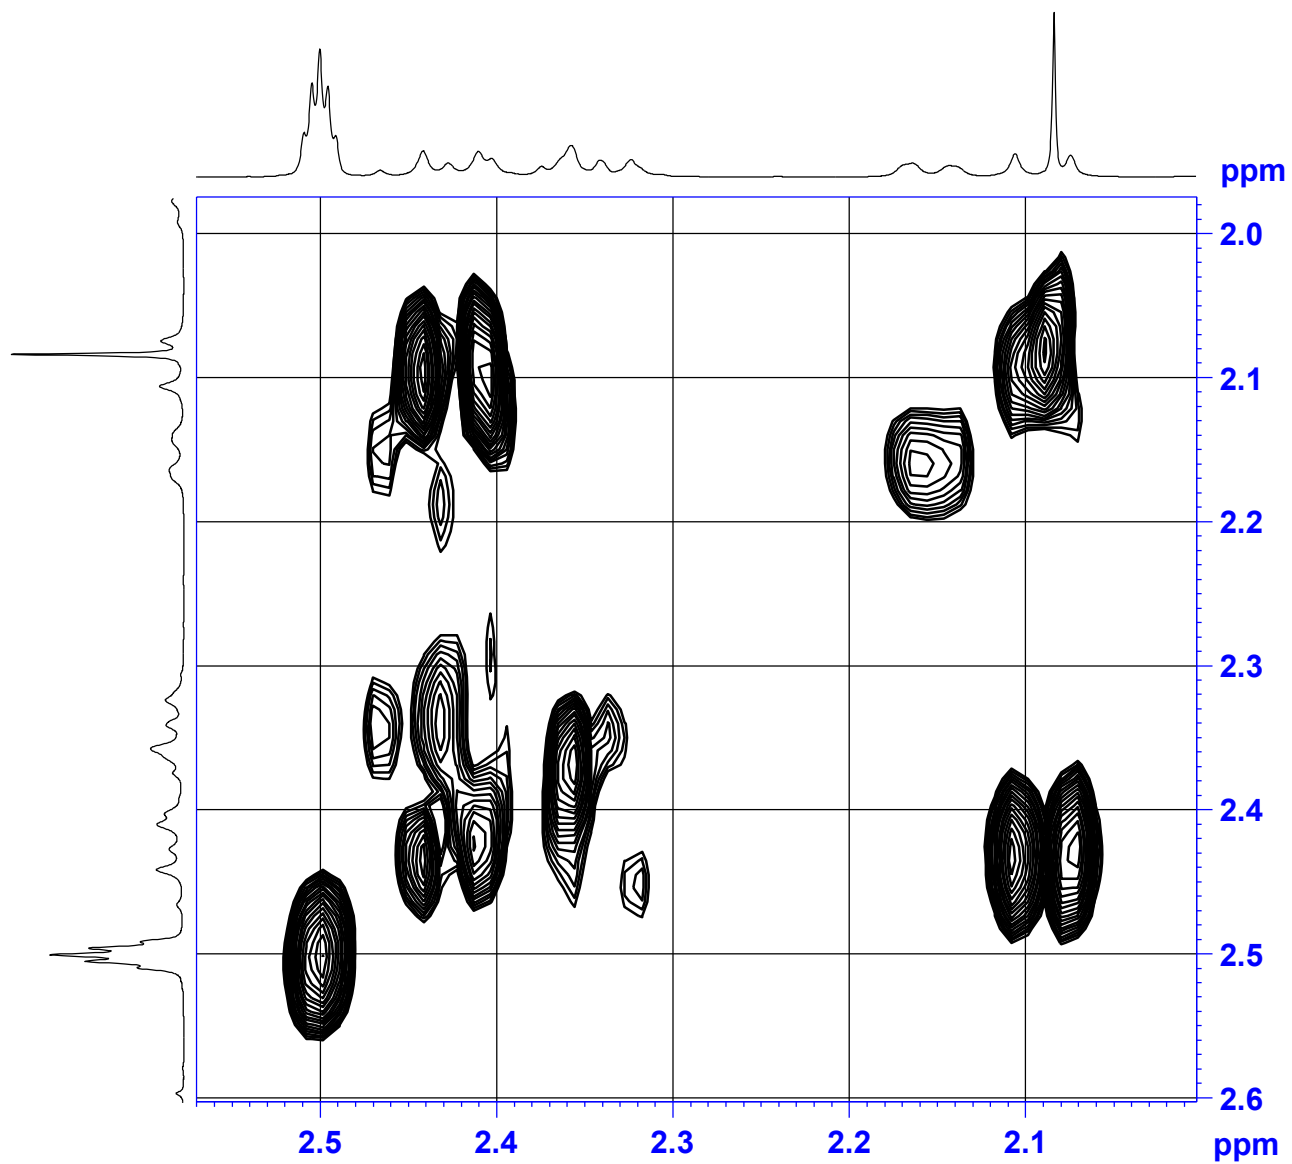



$^1\text{H}$ - $^1\text{H}$  COSY spectrum of Krishnolide A (**1**) in  $\text{DMSO-}d_6$

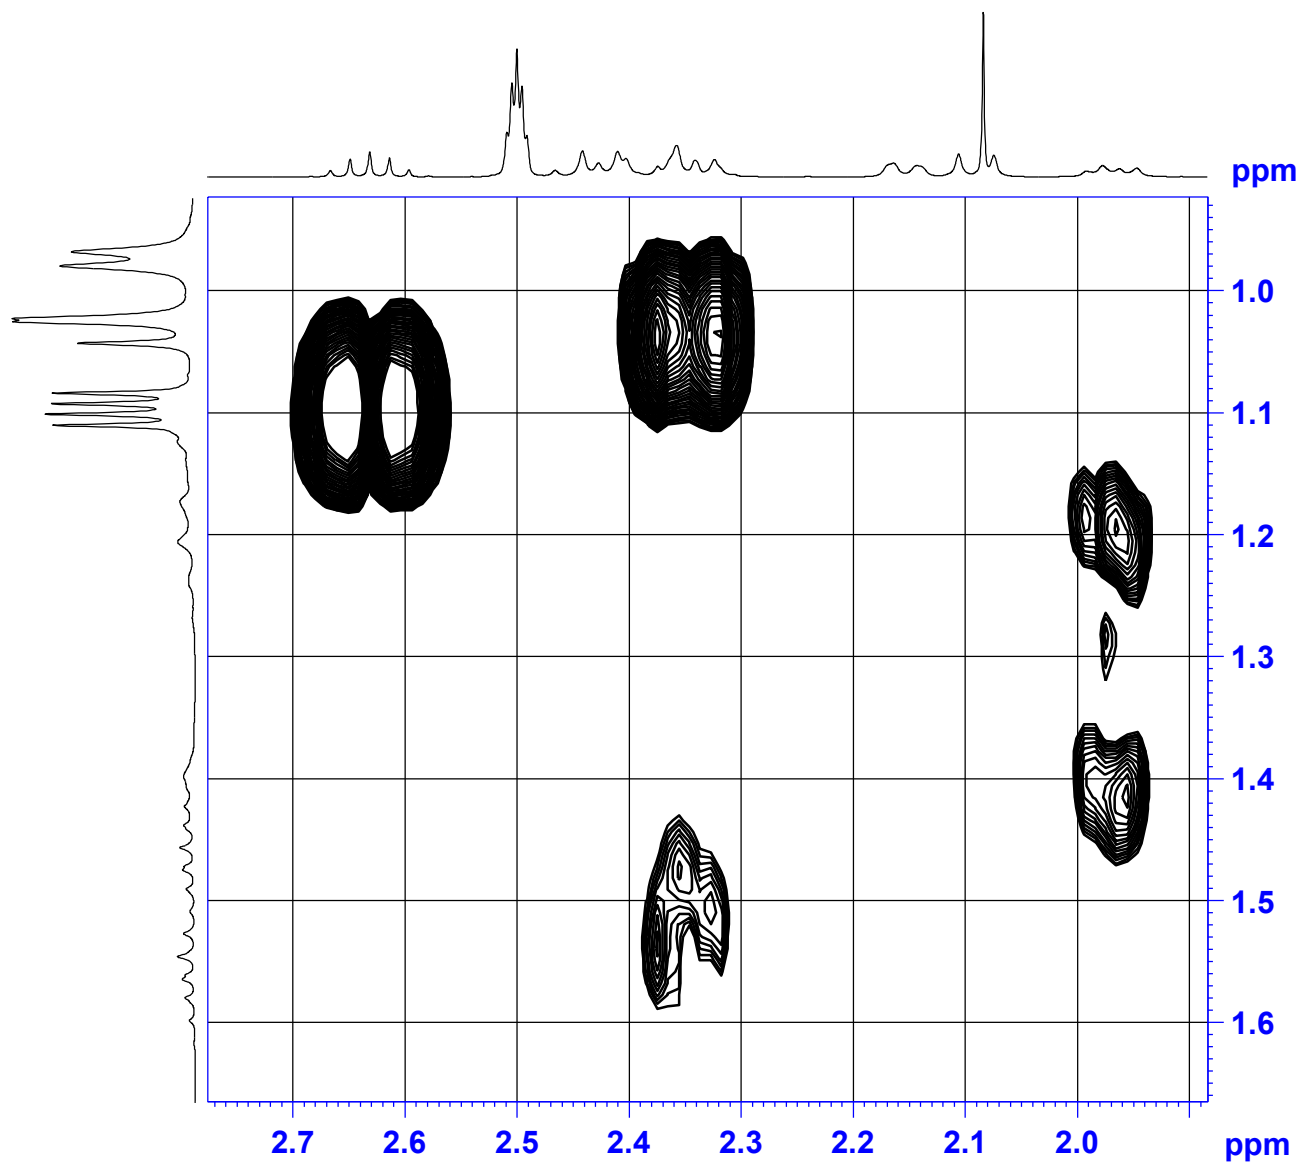

$^1\text{H}$ - $^1\text{H}$  COSY spectrum of Krishnolide A (**1**) in  $\text{DMSO-}d_6$

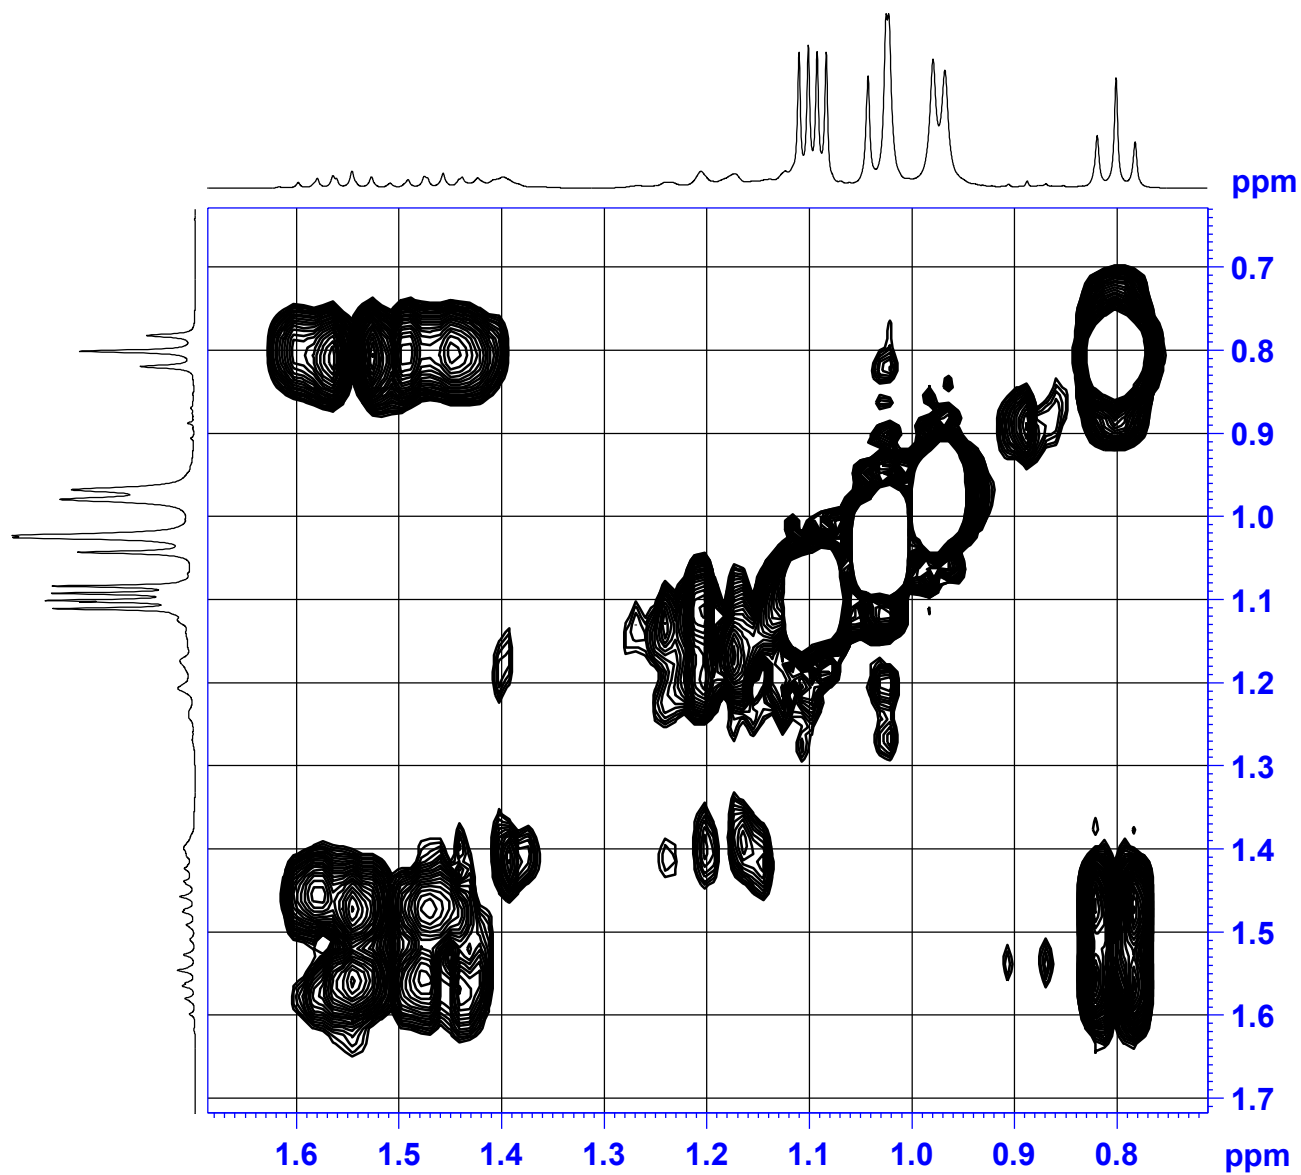

# HSQC spectrum of Krishnolide A (1) in DMSO- $d_6$

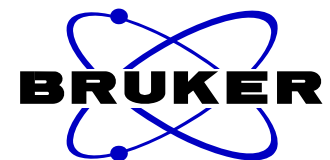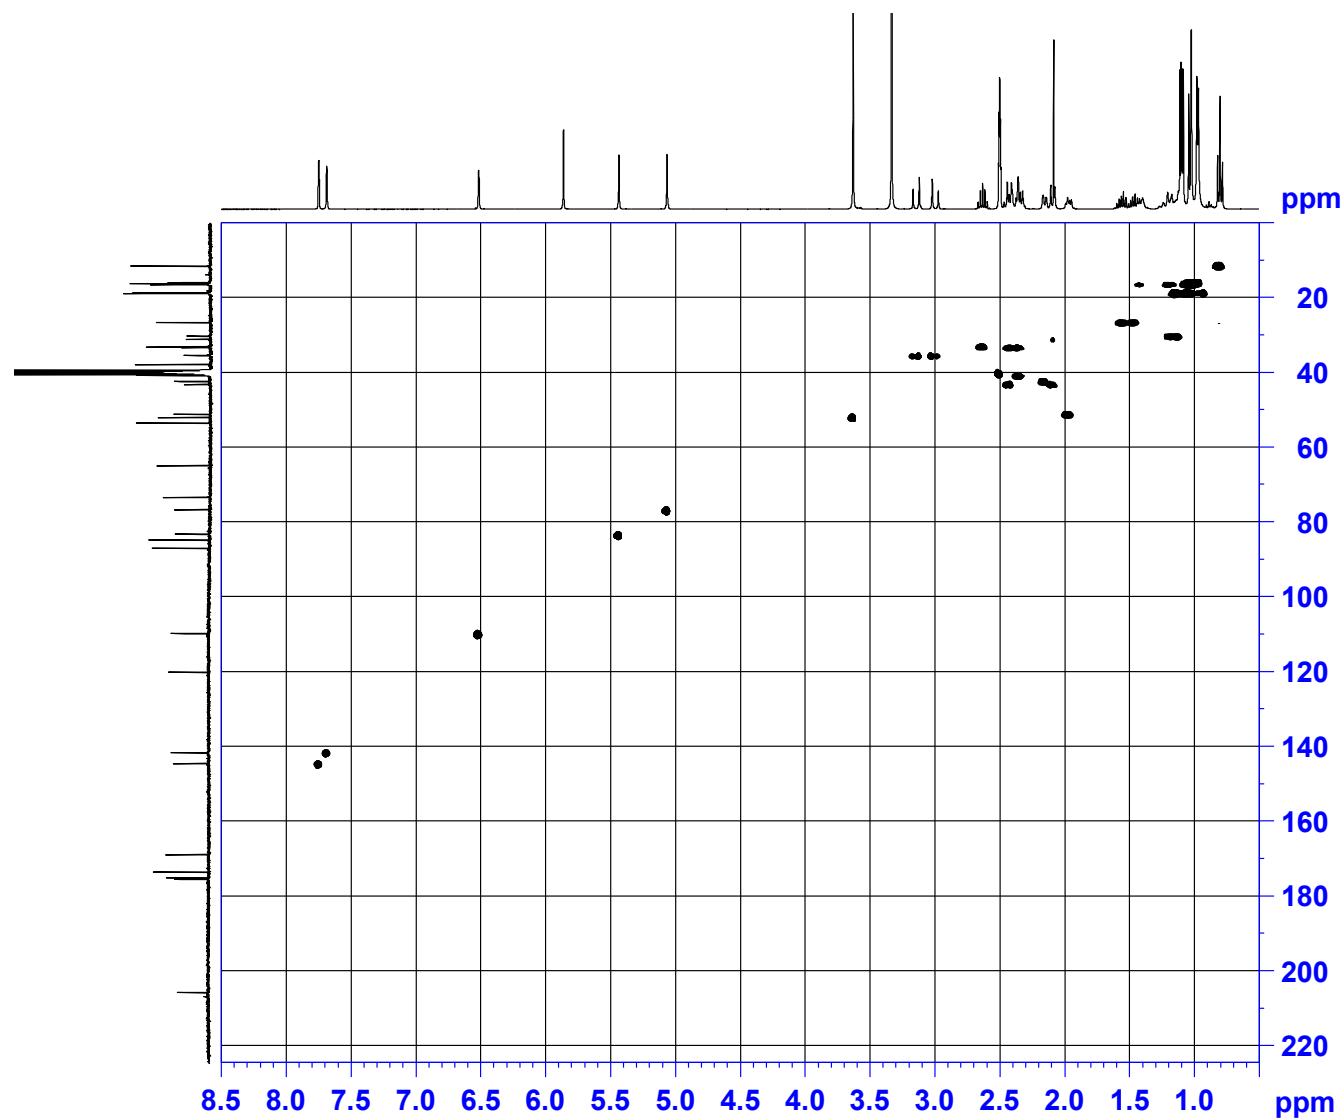

```

NAME           ZQ-17-DMSO
EXPNO          5
PROCNO         1
Date_          20170706
Time           1.11
INSTRUM        spect
PROBHD         5 mm CPPBBO BB
PULPROG        hsqcetgps12
TD             1024
SOLVENT        DMSO
NS             16
DS             16
SWH            4302.926 Hz
FIDRES        4.202076 Hz
AQ            0.1190388 sec
RG            208.5
DW            116.200 usec
DE            10.00 usec
TE            297.0 K
CNST2         145.0000000
D0            0.00000300 sec
D1            1.46497905 sec
D4            0.00172414 sec
D11           0.03000000 sec
D16           0.00020000 sec
D24           0.00086207 sec
IN0           0.00002080 sec
ZGOPTNS
    
```

```

===== CHANNEL f1 =====
SFO1         400.1320007 MHz
NUC1          1H
P1            11.50 usec
P2            23.00 usec
P28           0.00 usec
ND0           2
TD            256
SFO1         100.6233 MHz
FIDRES        93.900238 Hz
SW            238.896 ppm
FnMODE        Echo-Antiecho
SI            1024
SF            400.1300015 MHz
WDW           QSINE
SSB           2
LB            0.00 Hz
GB            0
PC            1.40
SI            1024
MC2           echo-antiecho
SF            100.6127556 MHz
WDW           QSINE
SSB           2
LB            0.00 Hz
GB            0
    
```

HSQC spectrum of Krishnolide A (1) in DMSO- $d_6$

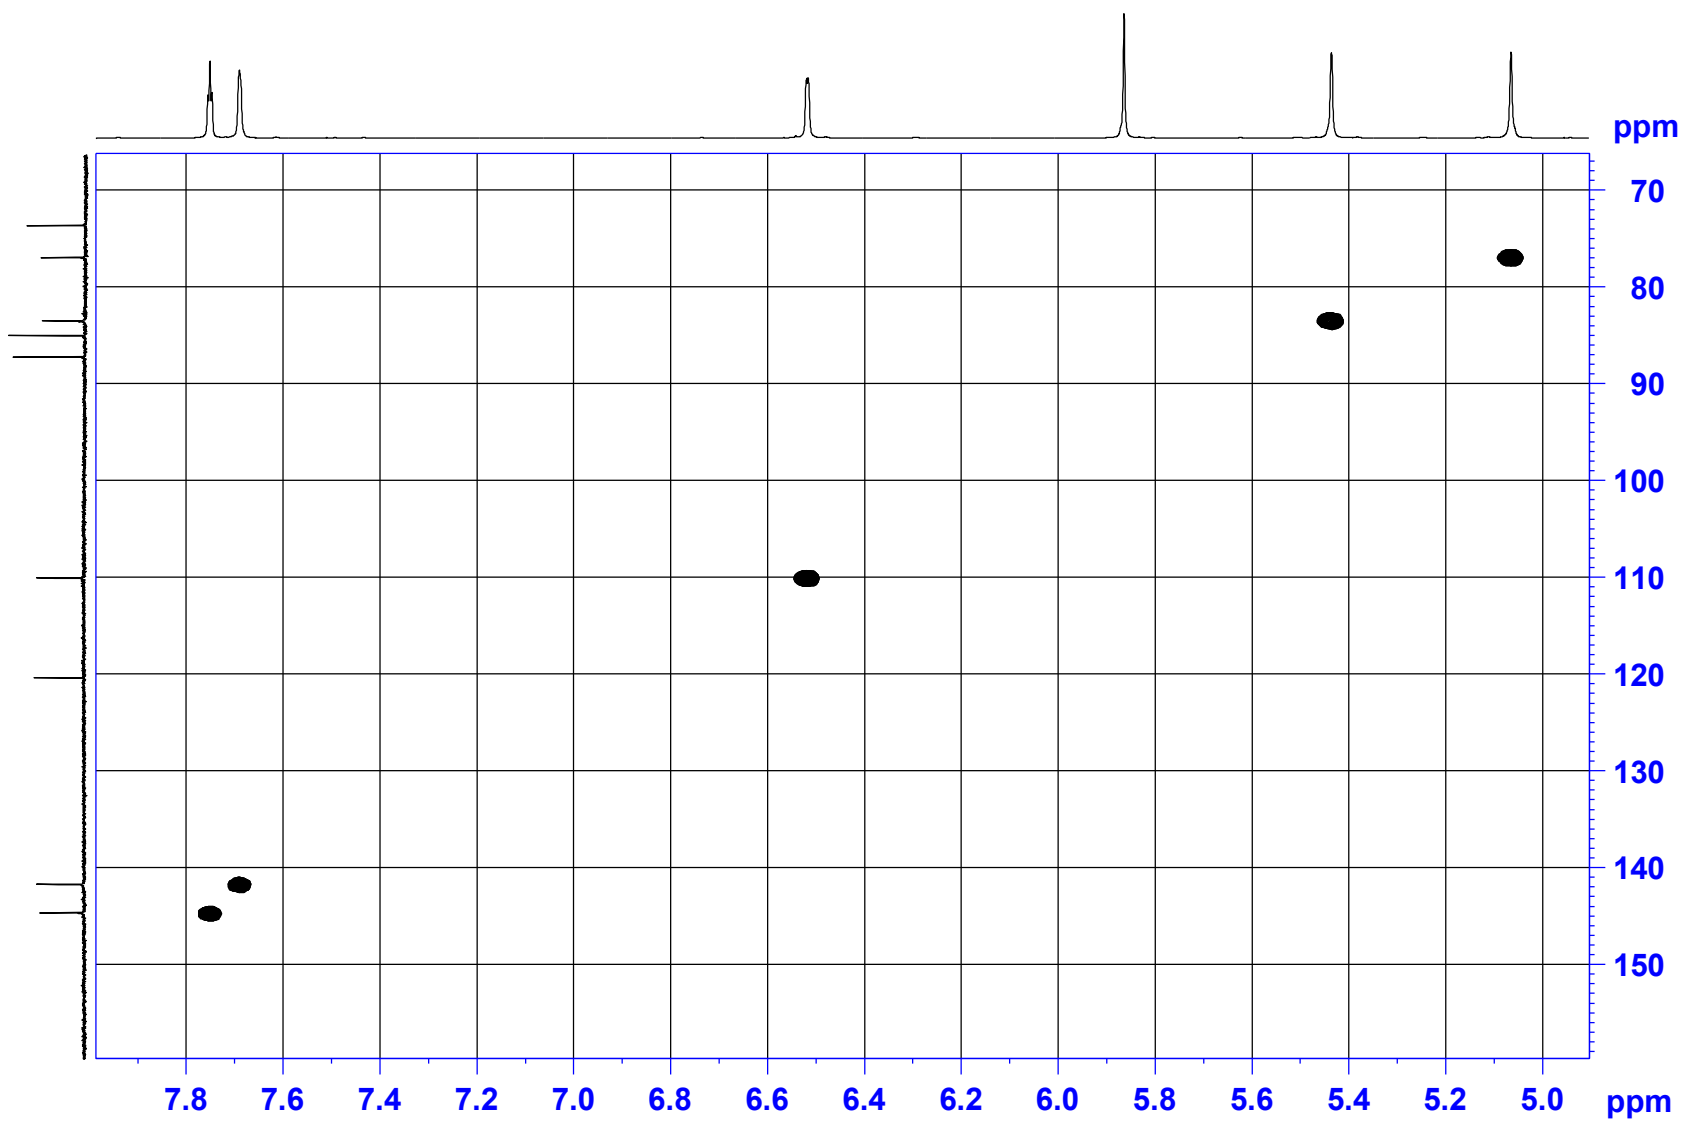

# HSQC spectrum of Krishnolide A (1) in DMSO- $d_6$

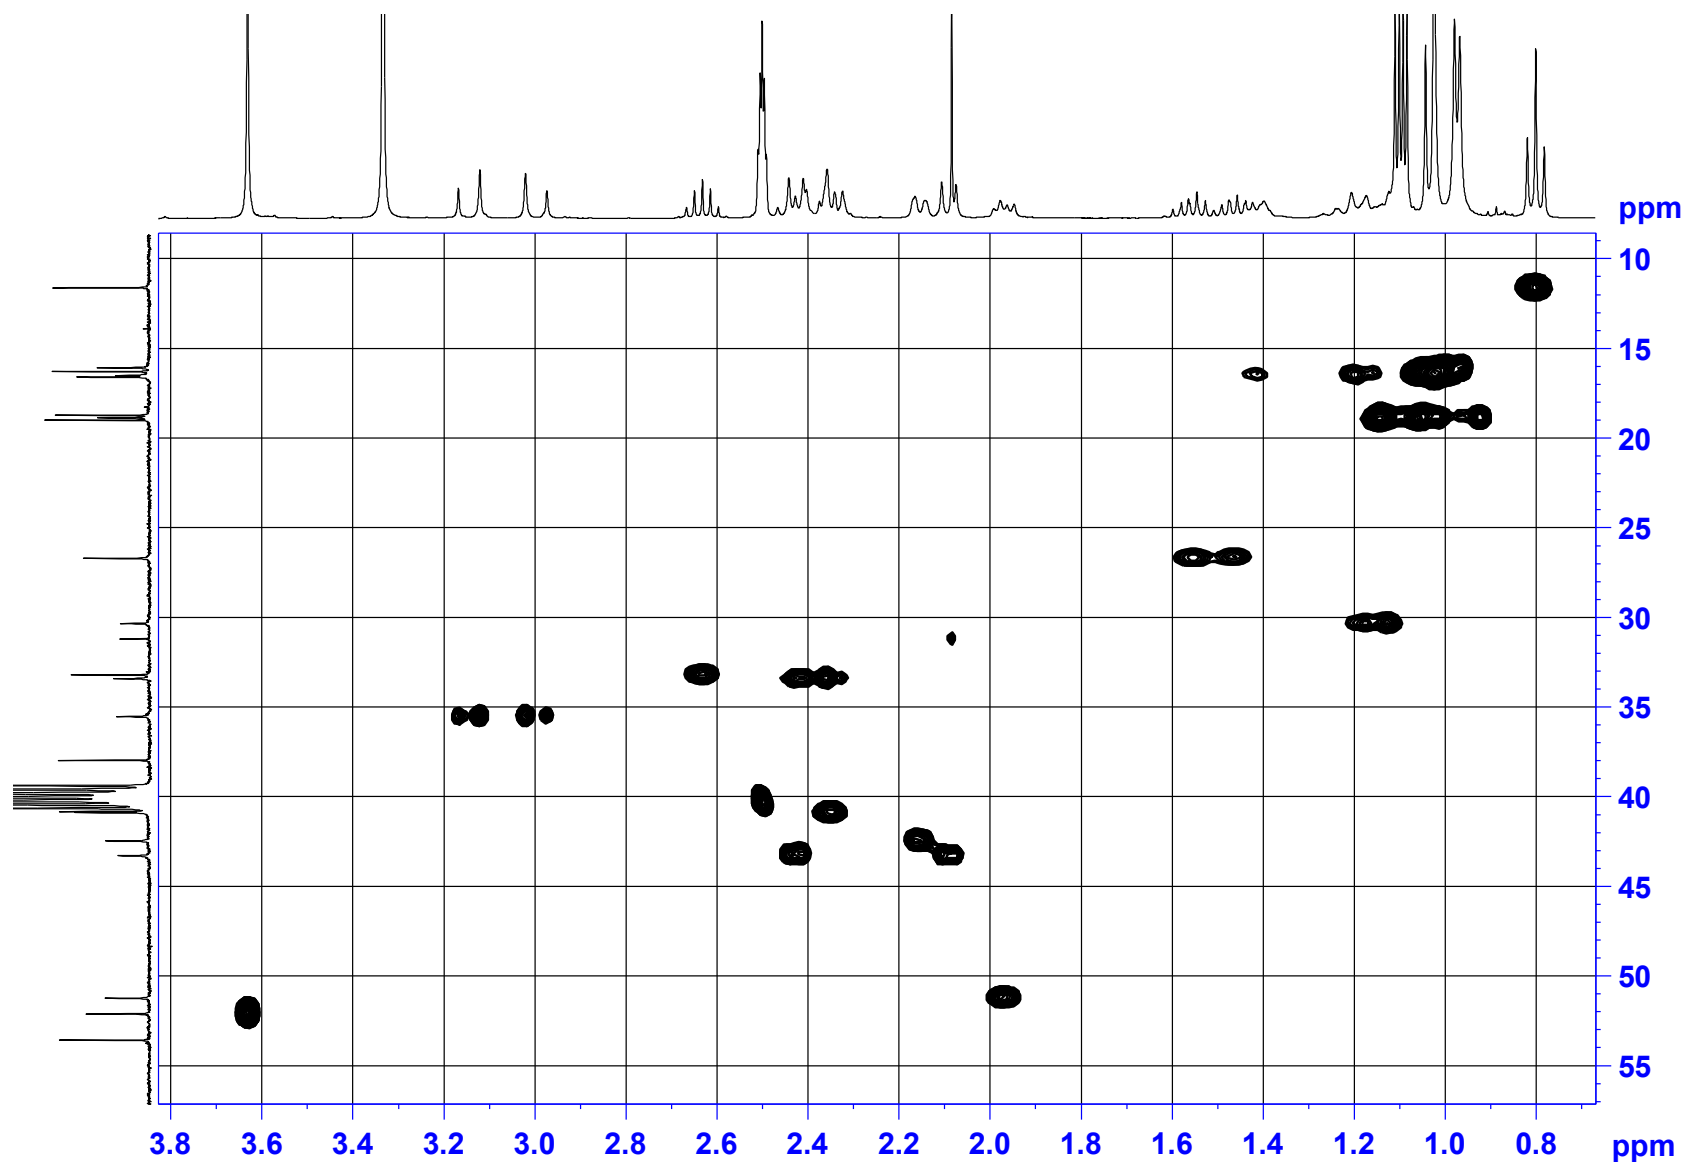

HSQC spectrum of Krishnolide A (1) in DMSO- $d_6$

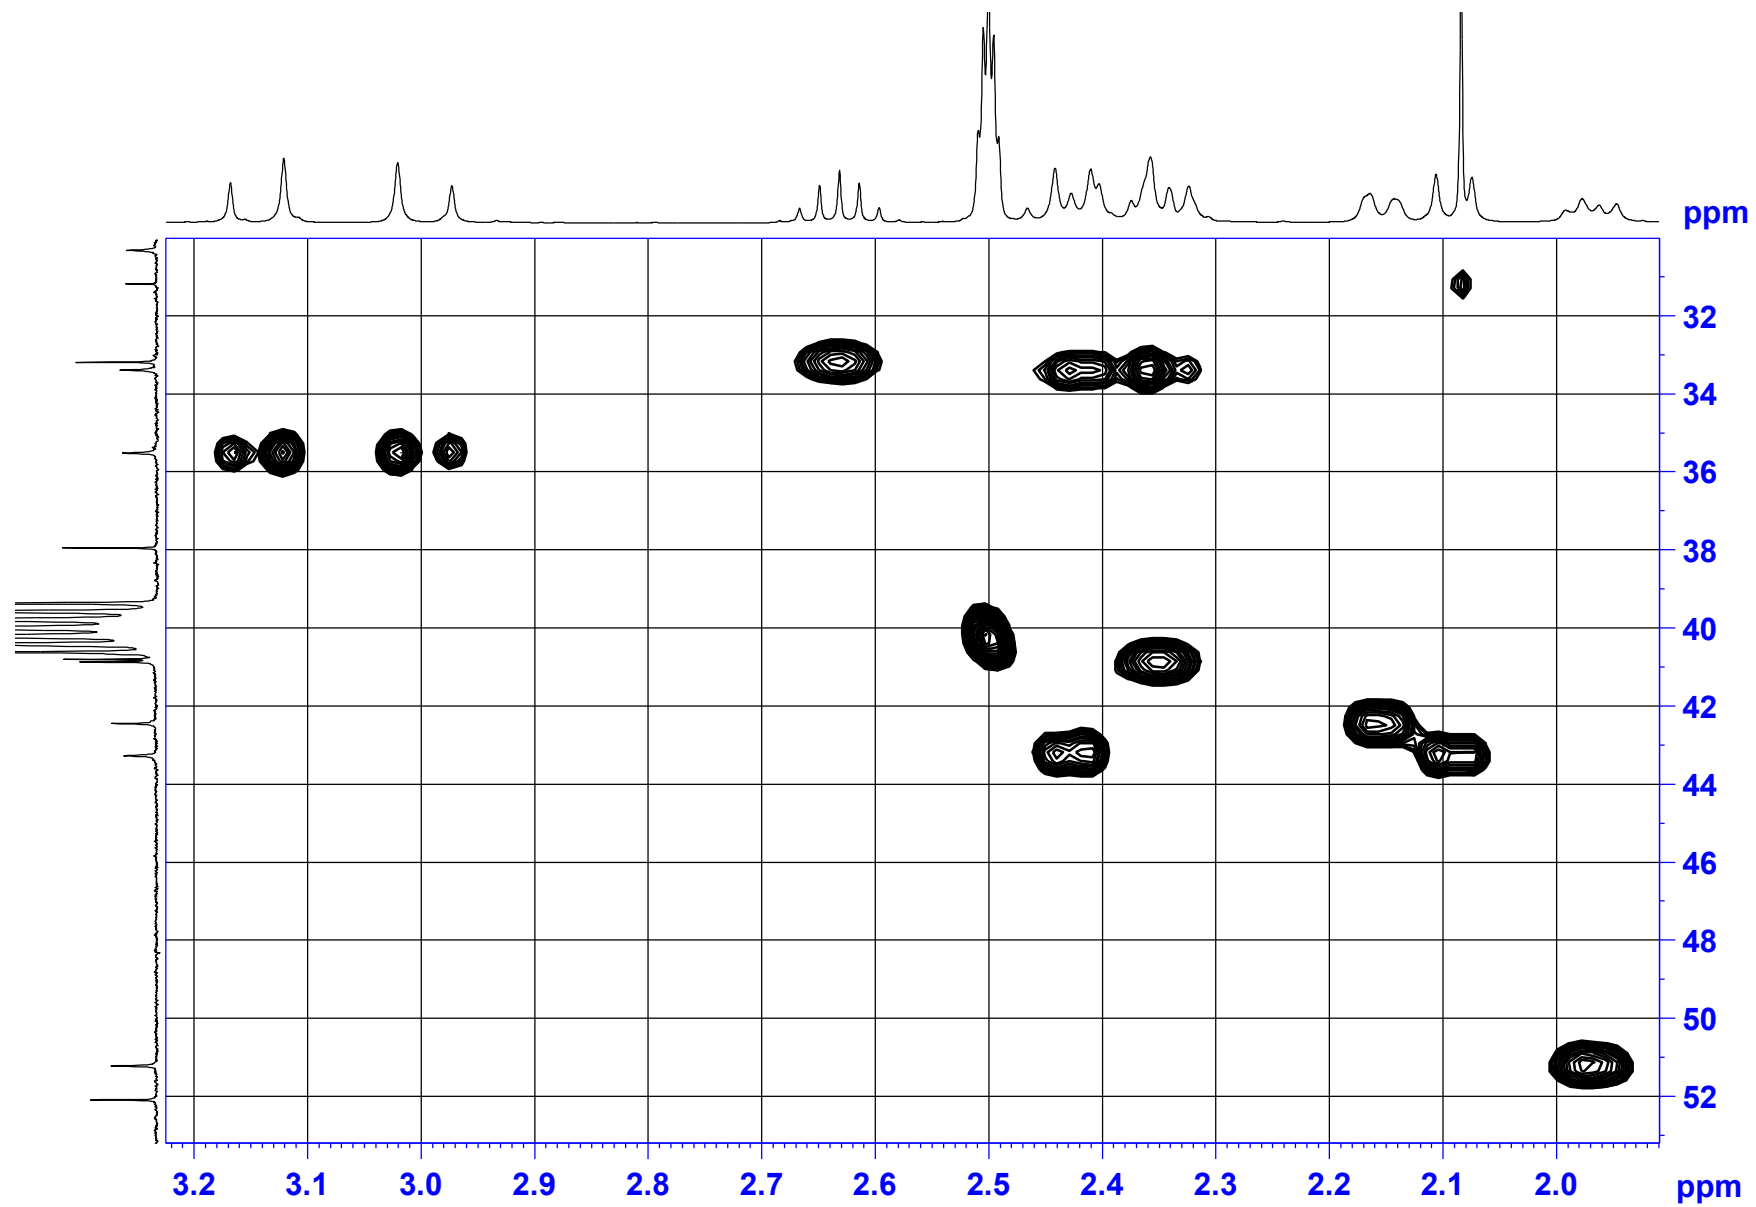

# HSQC spectrum of Krishnolide A (1) in DMSO- $d_6$

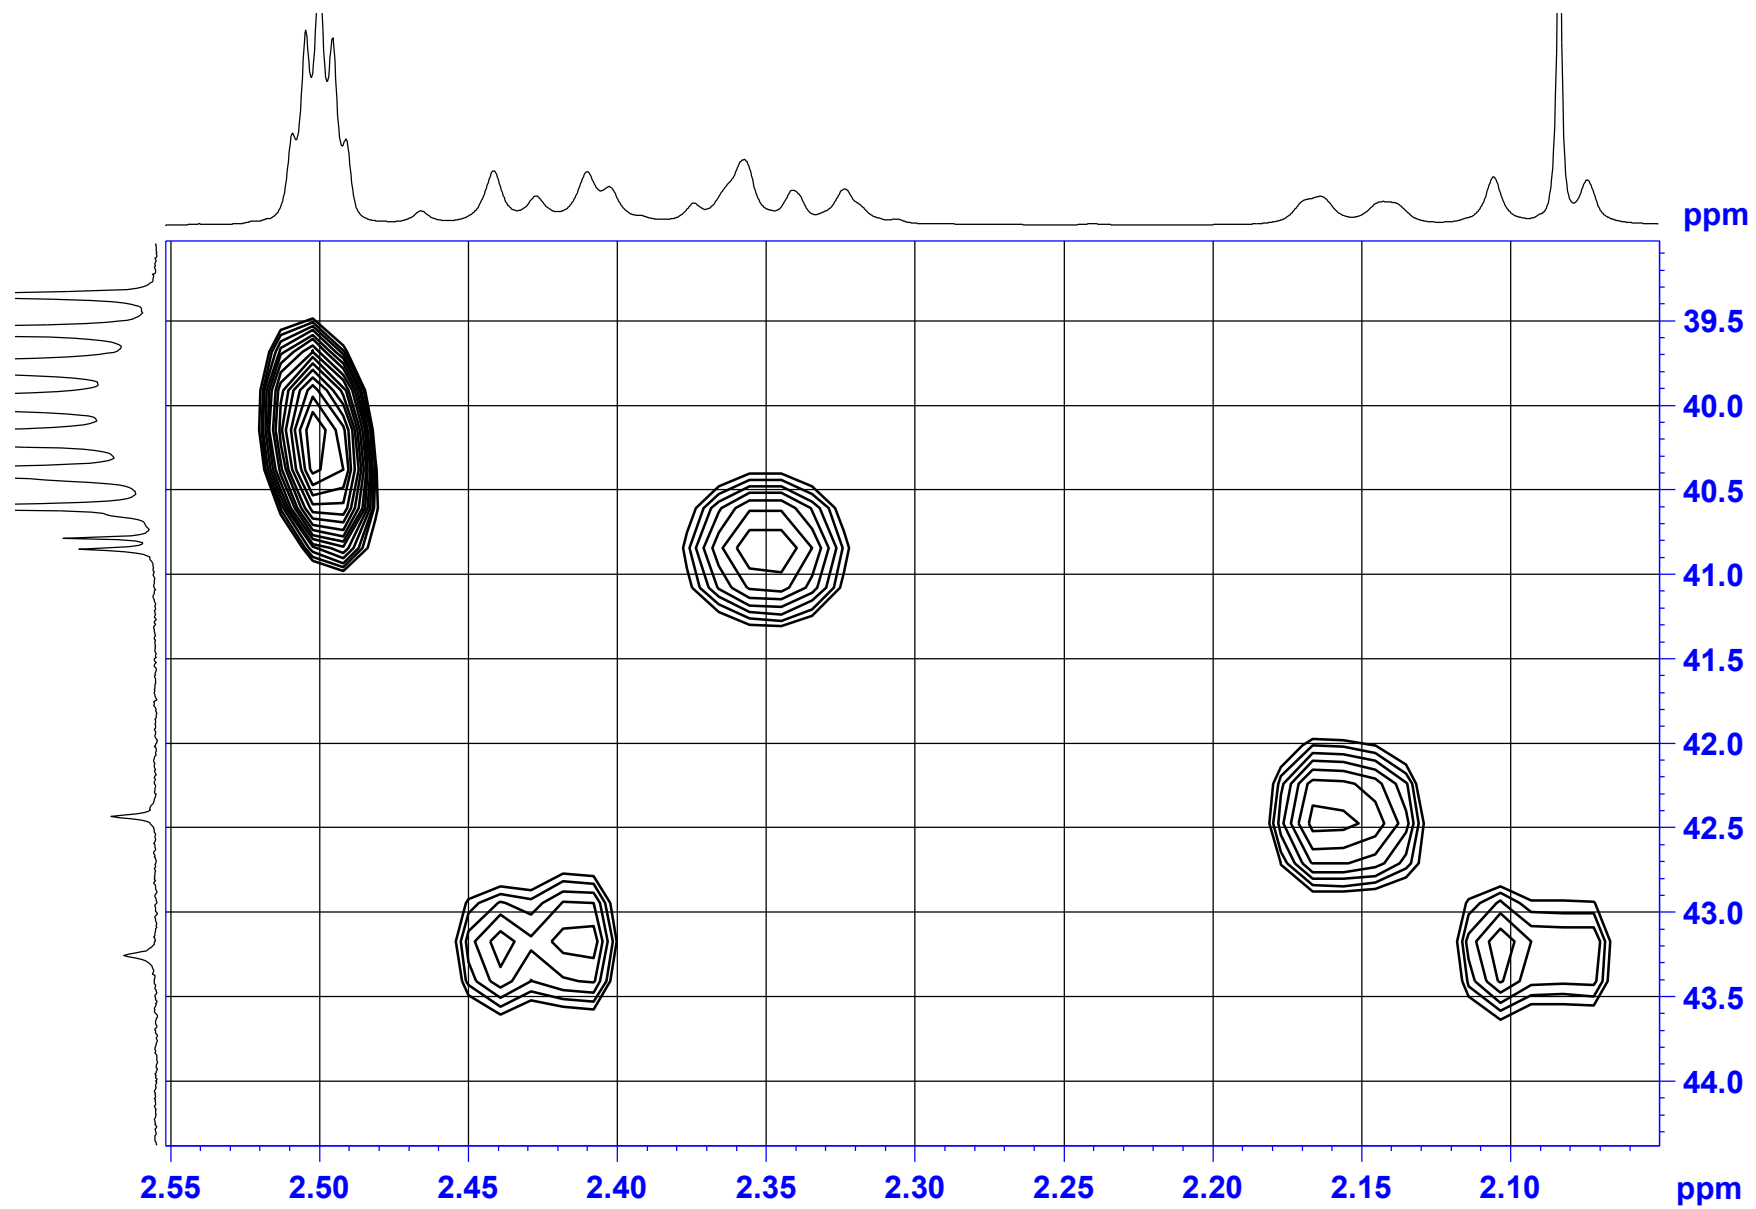

HSQC spectrum of Krishnolide A (1) in DMSO- $d_6$

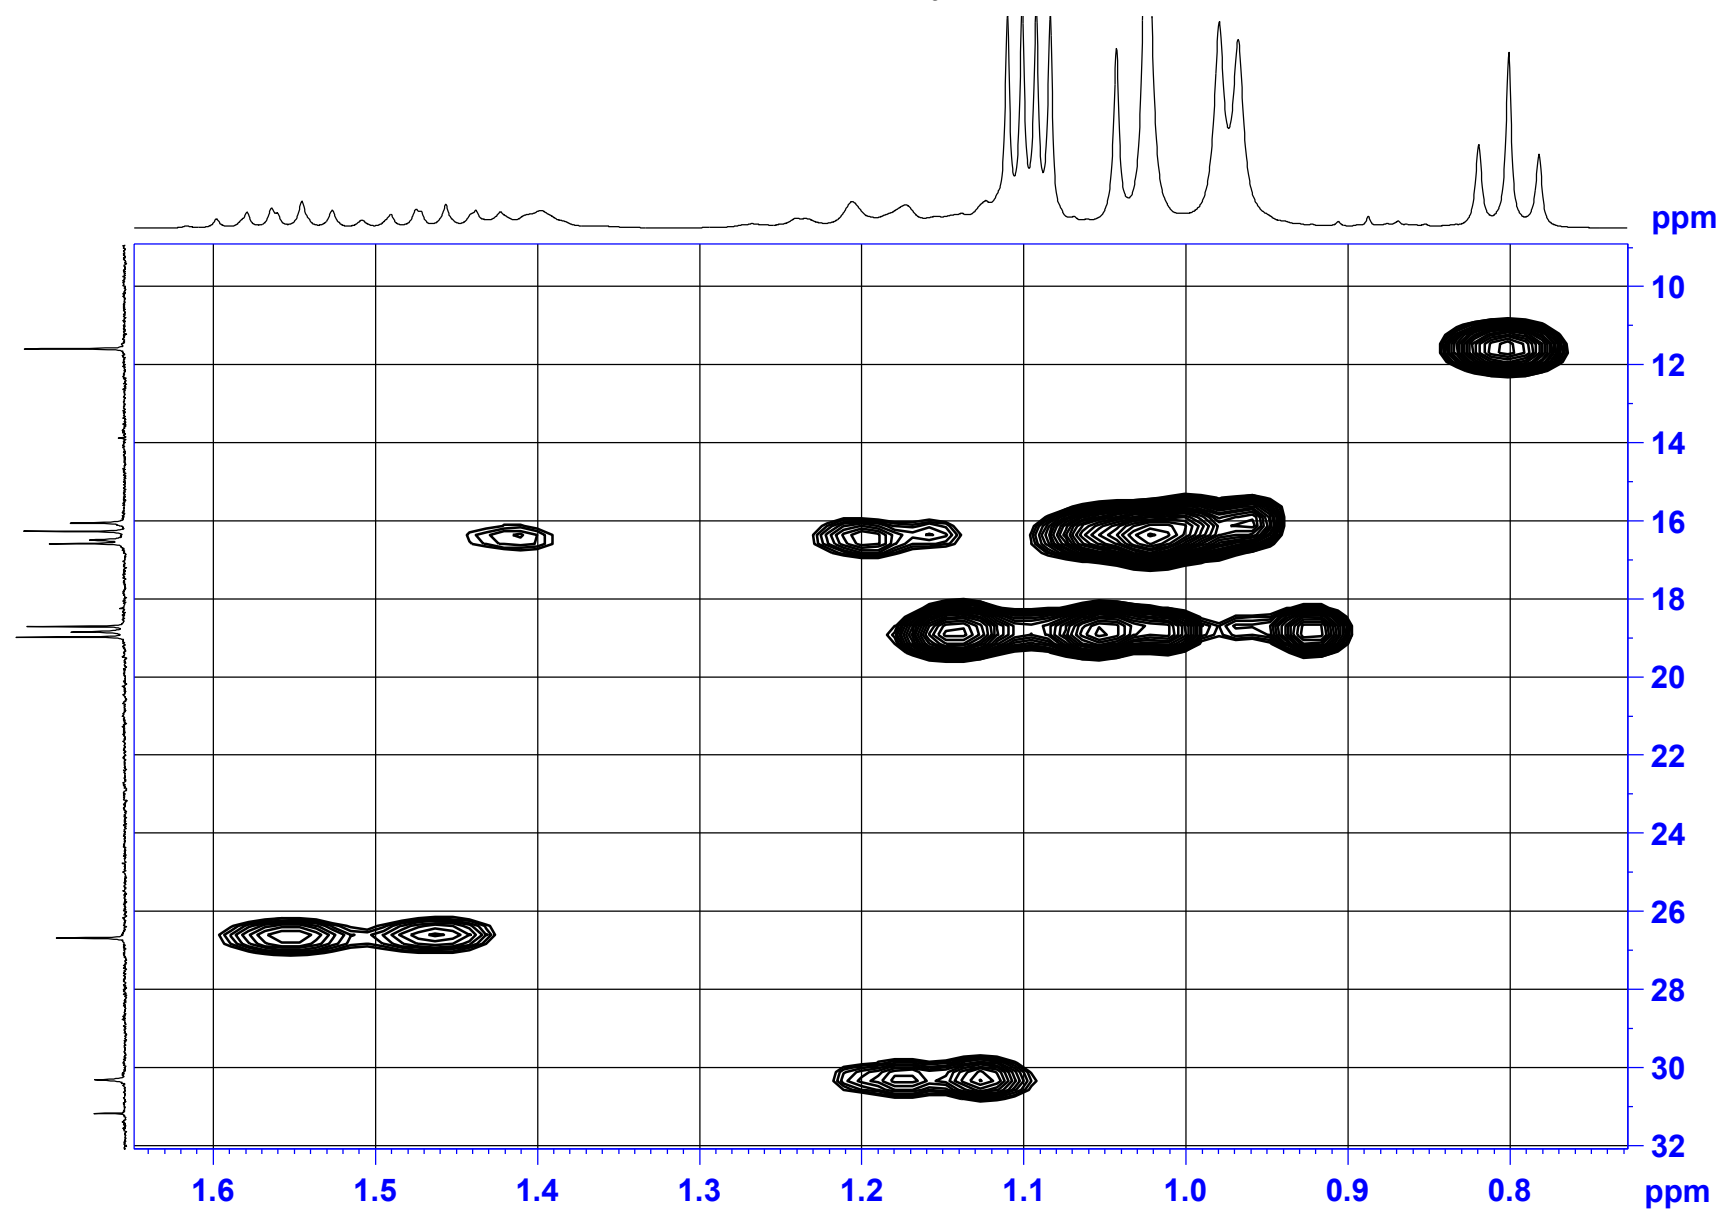



HSQC spectrum of Krishnolide A (1) in DMSO- $d_6$

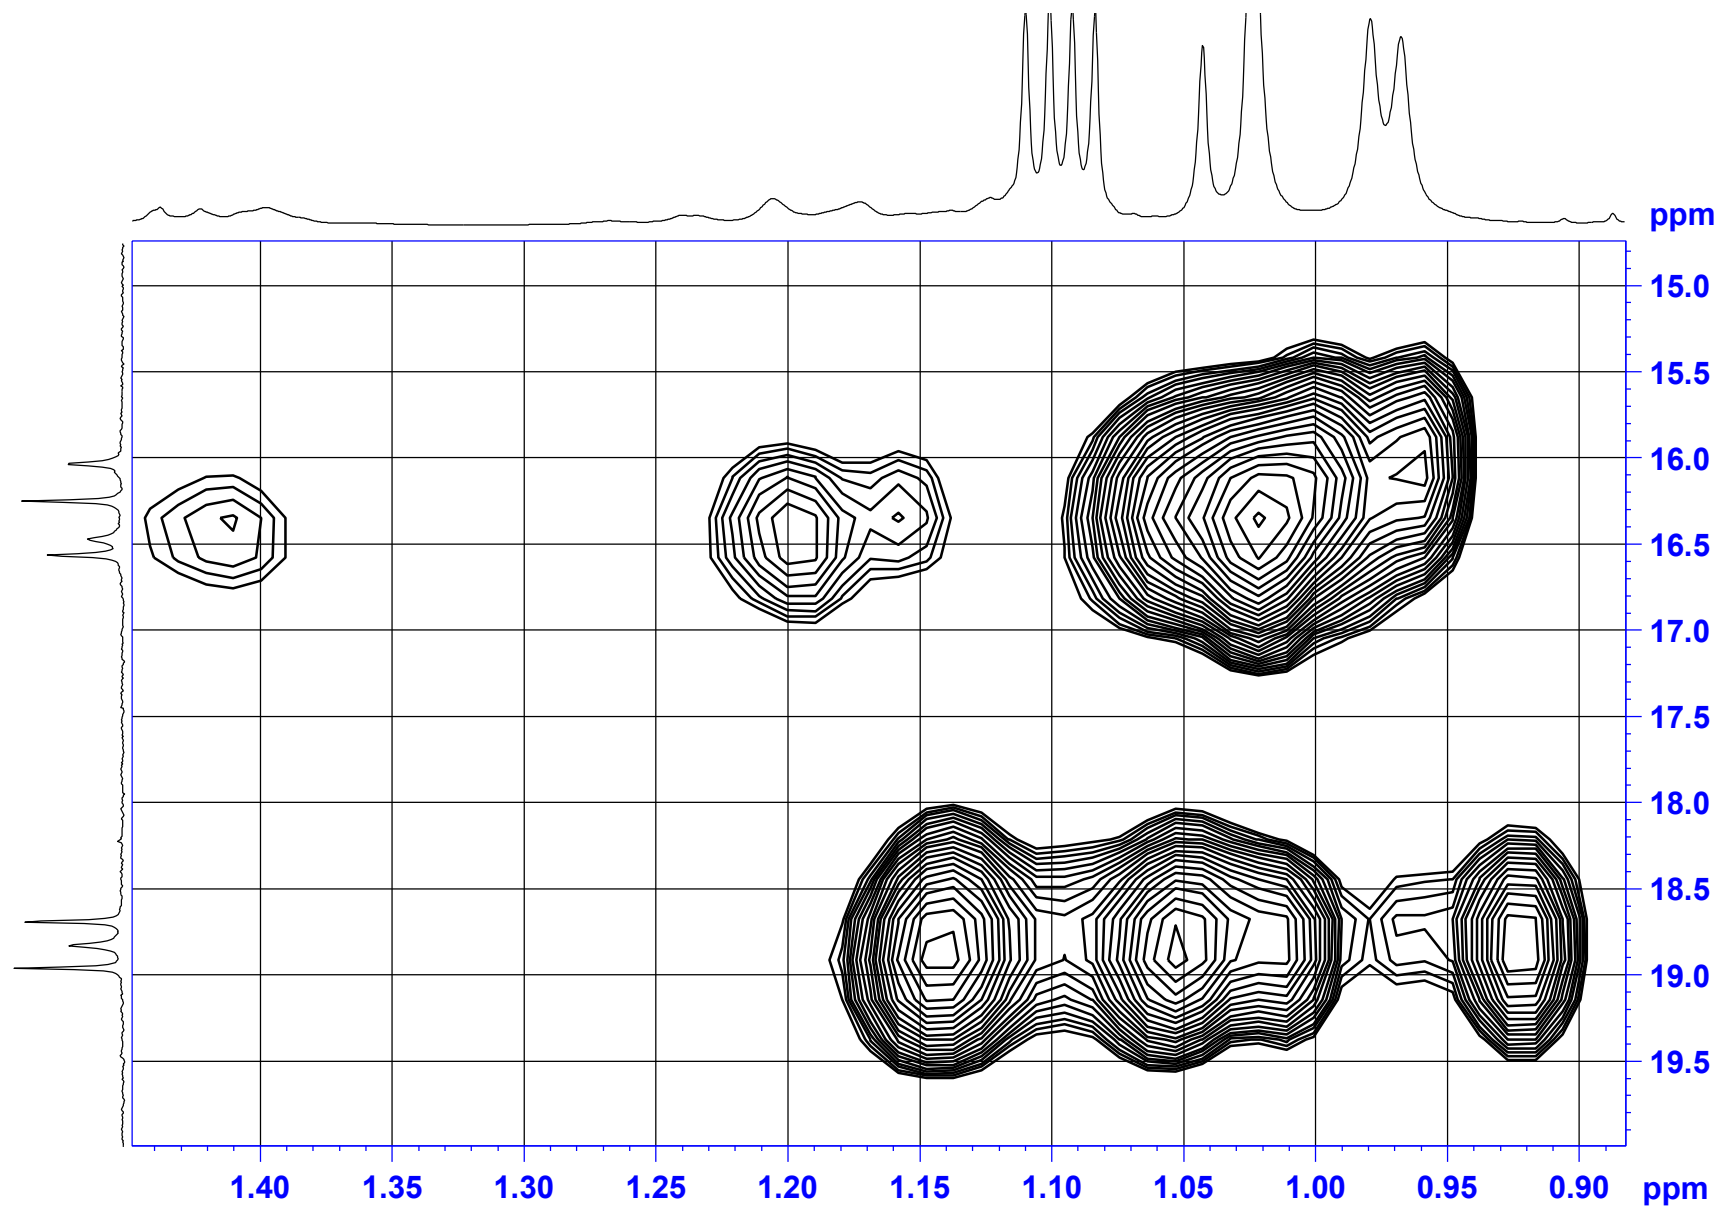

# HMBC spectrum of Krishnolide A (1) in DMSO- $d_6$

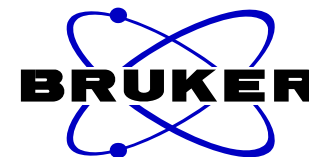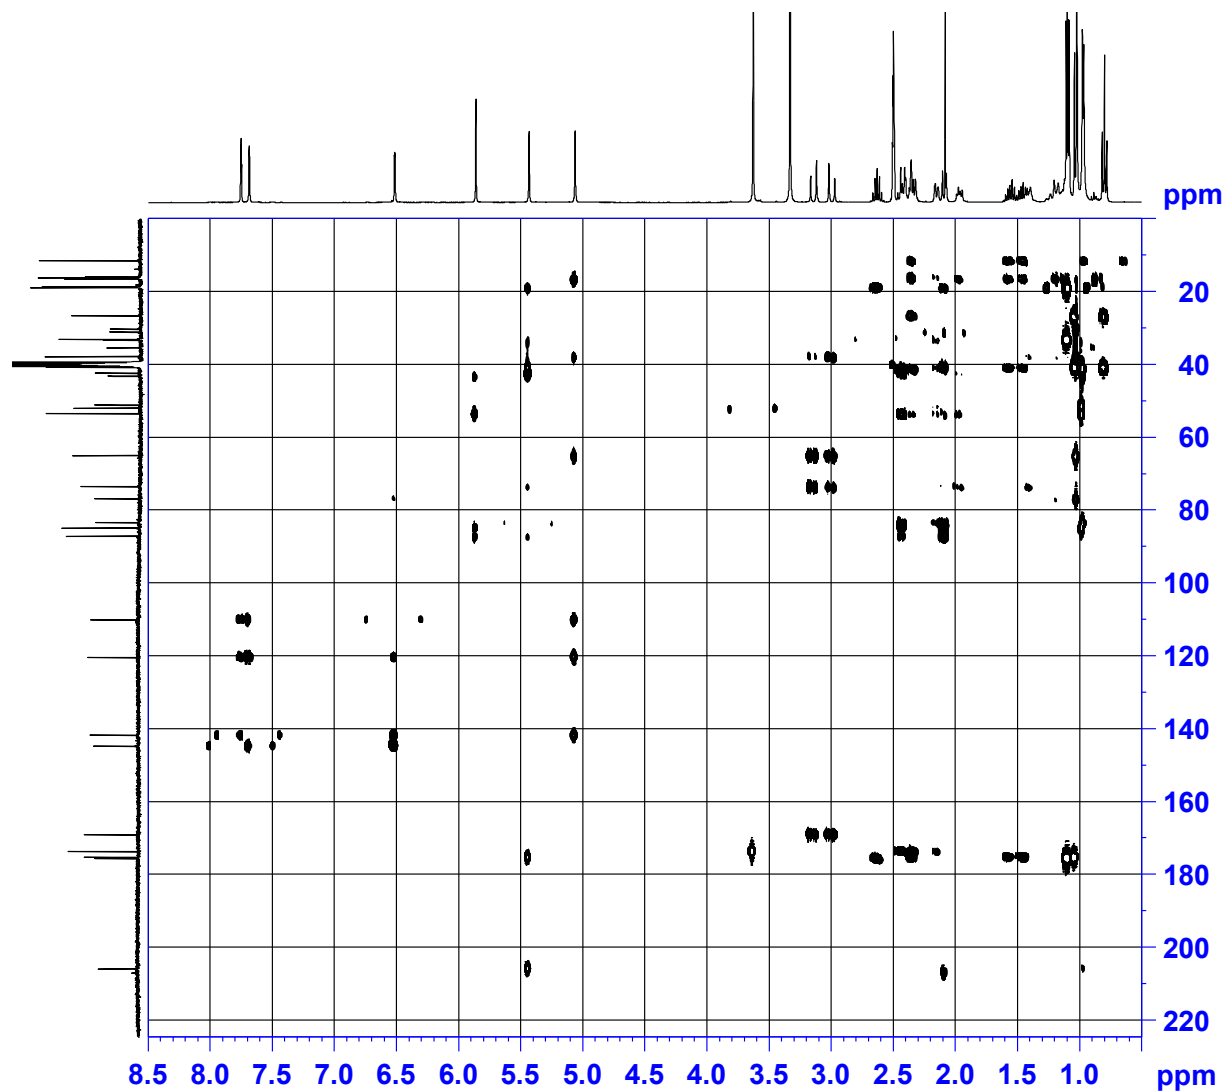

```

NAME          ZQ-17-DMSO
EXPNO         6
PROCNO       1
Date_        20170706
Time         3.02
INSTRUM      spect
PROBHD       5 mm CPPBBO BB
PULPROG      hmbcgp1pndqf
TD           4096
SOLVENT      DMSO
NS           32
DS           16
SWH          5197.505 Hz
FIDRES       1.268922 Hz
AQ           0.3940852 sec
RG           208.5
DW           96.200 usec
DE           10.00 usec
TE           297.0 K
CNST2        145.0000000
CNST13       10.0000000
D0           0.00000300 sec
D1           1.50000000 sec
D2           0.00344828 sec
D6           0.05000000 sec
D16          0.00020000 sec
IN0          0.00002080 sec
    
```

```

===== CHANNEL f1 =====
SFO1         400.1323208 MHz
NUC1         1H
P1           11.50 usec
P2           23.00 usec
ND0          2
TD           128
SFO1         100.6233 MHz
FIDRES       187.800476 Hz
SW           238.896 ppm
FnMODE       QF
SI           2048
SF           400.1300015 MHz
WDW          SINE
SSB          0
LB           0.00 Hz
GB           0
PC           1.40
SI           1024
MC2          QF
SF           100.6127527 MHz
WDW          SINE
SSB          0
LB           0.00 Hz
GB           0
    
```

HMBC spectrum of Krishnolide A (1) in DMSO- $d_6$

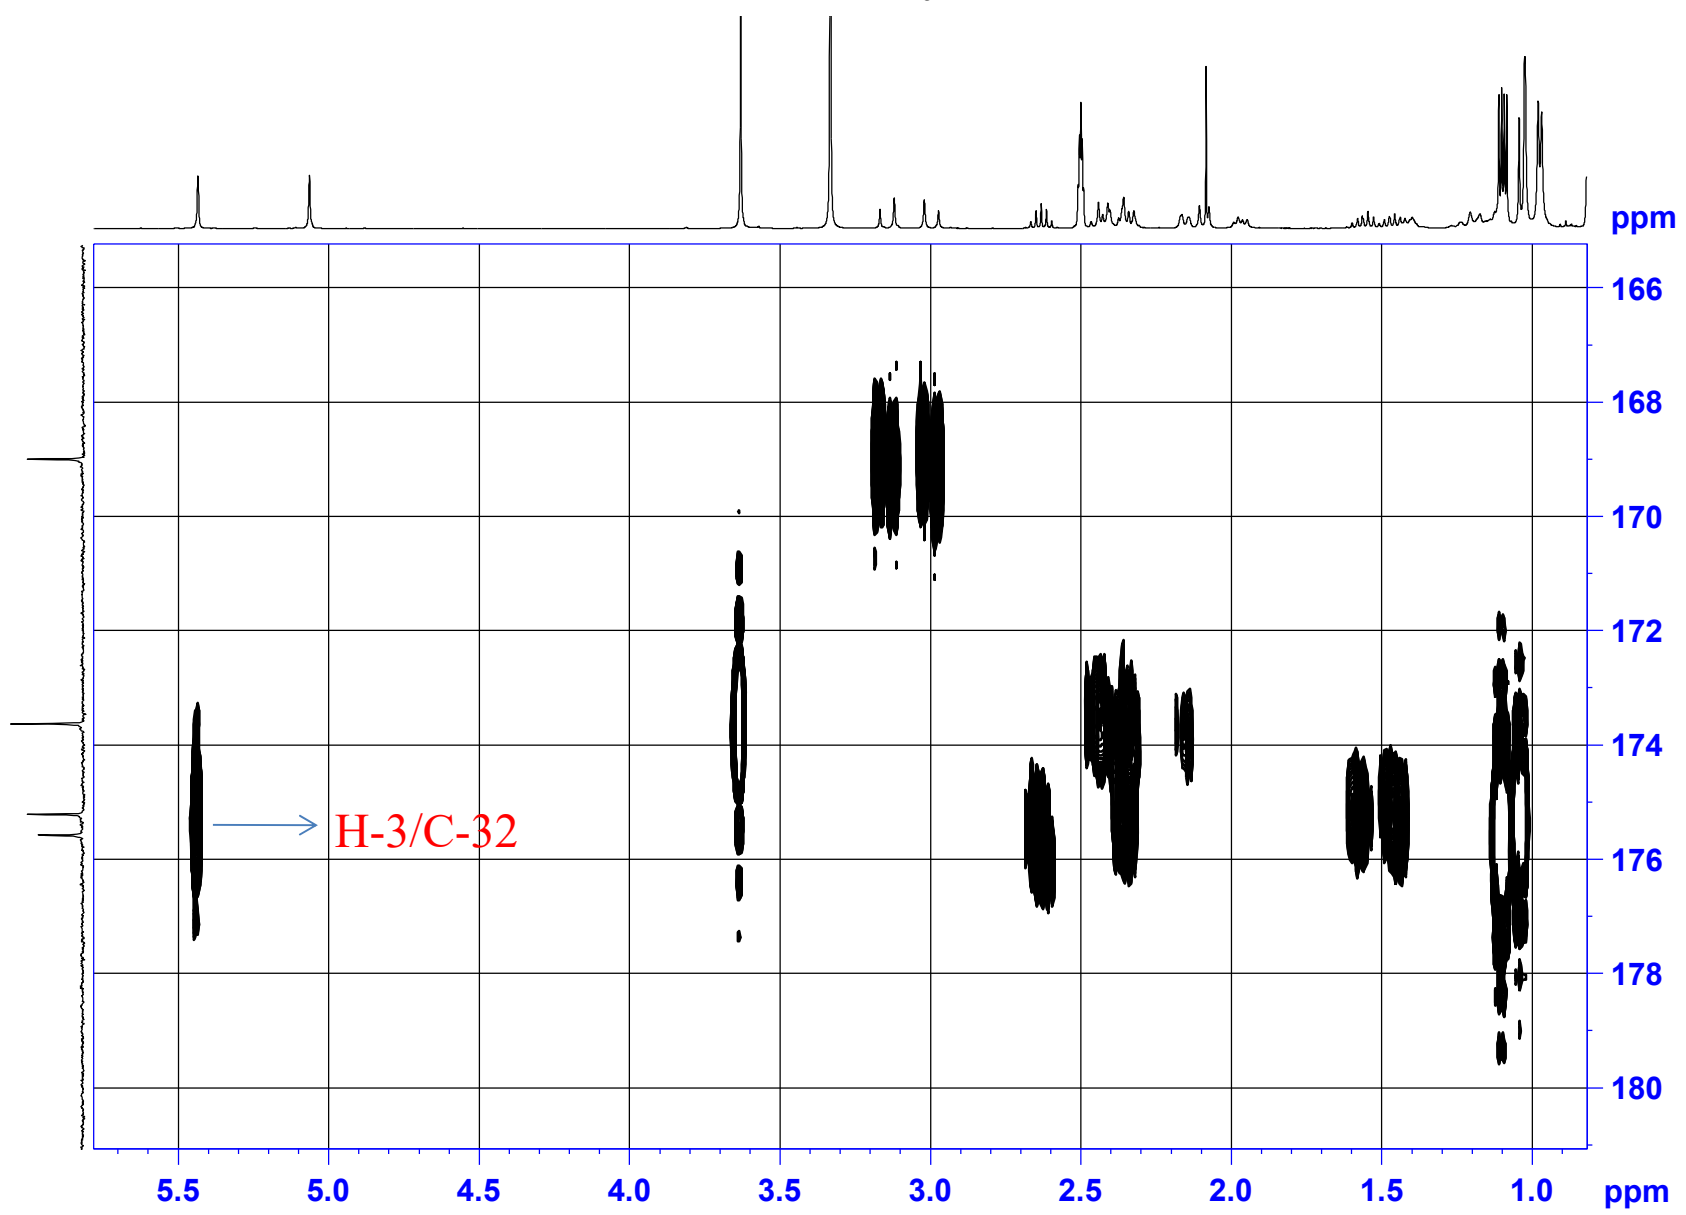

HMBC spectrum of Krishnolide A (1) in DMSO- $d_6$

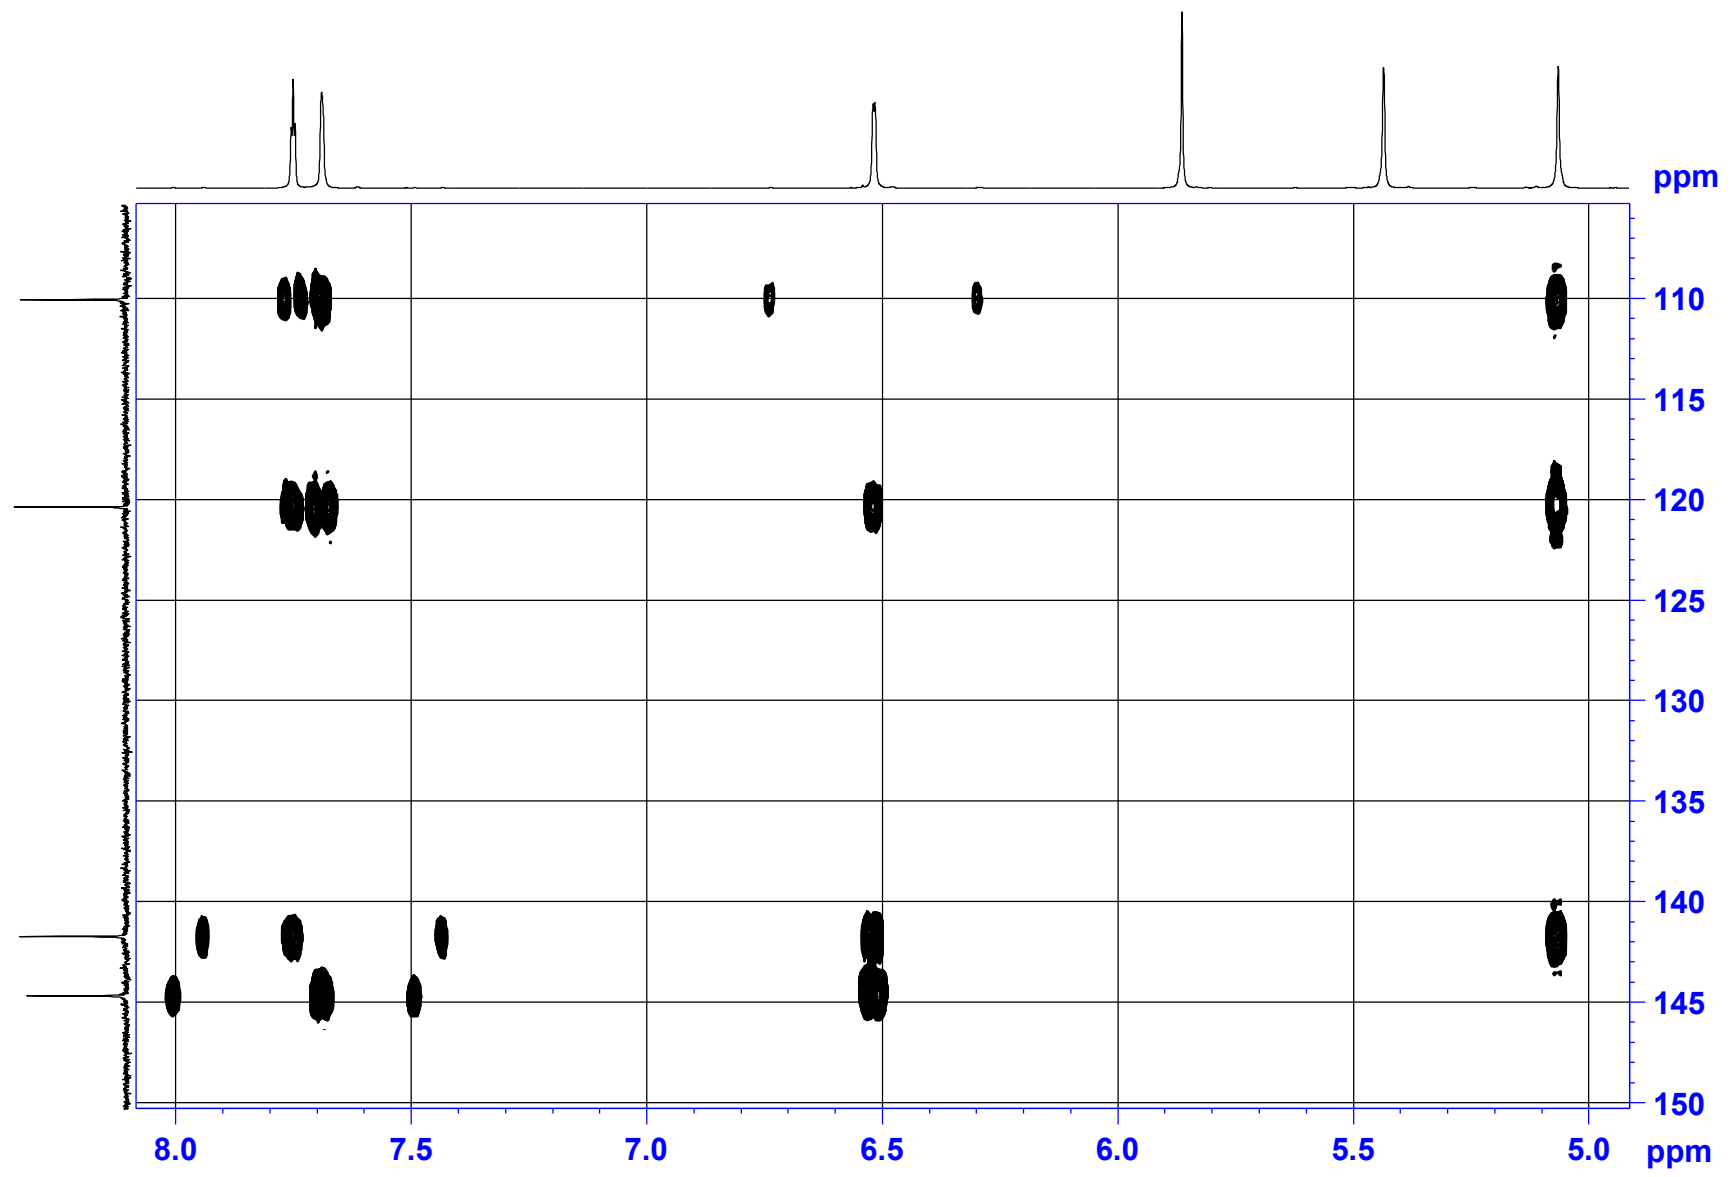

HMBC spectrum of Krishnolide A (1) in DMSO- $d_6$

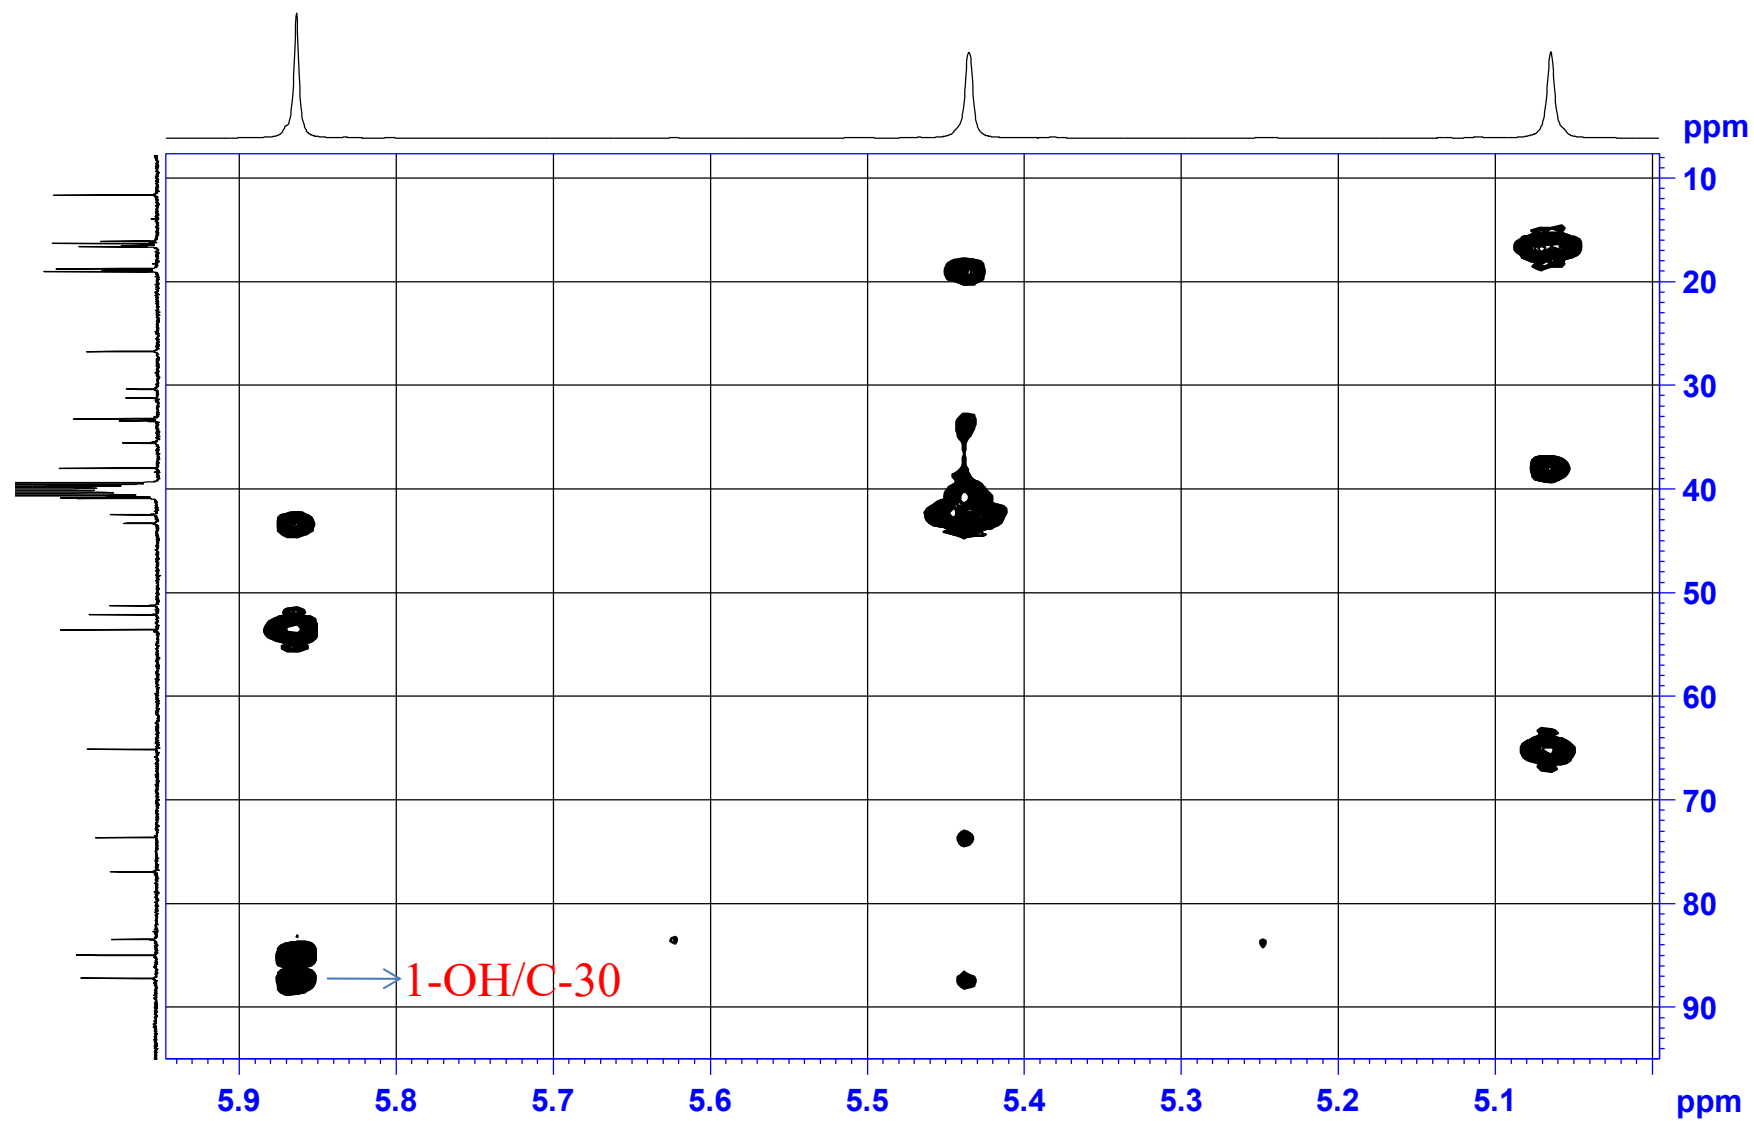

# HMBC spectrum of Krishnolide A (1) in DMSO-*d*<sub>6</sub>

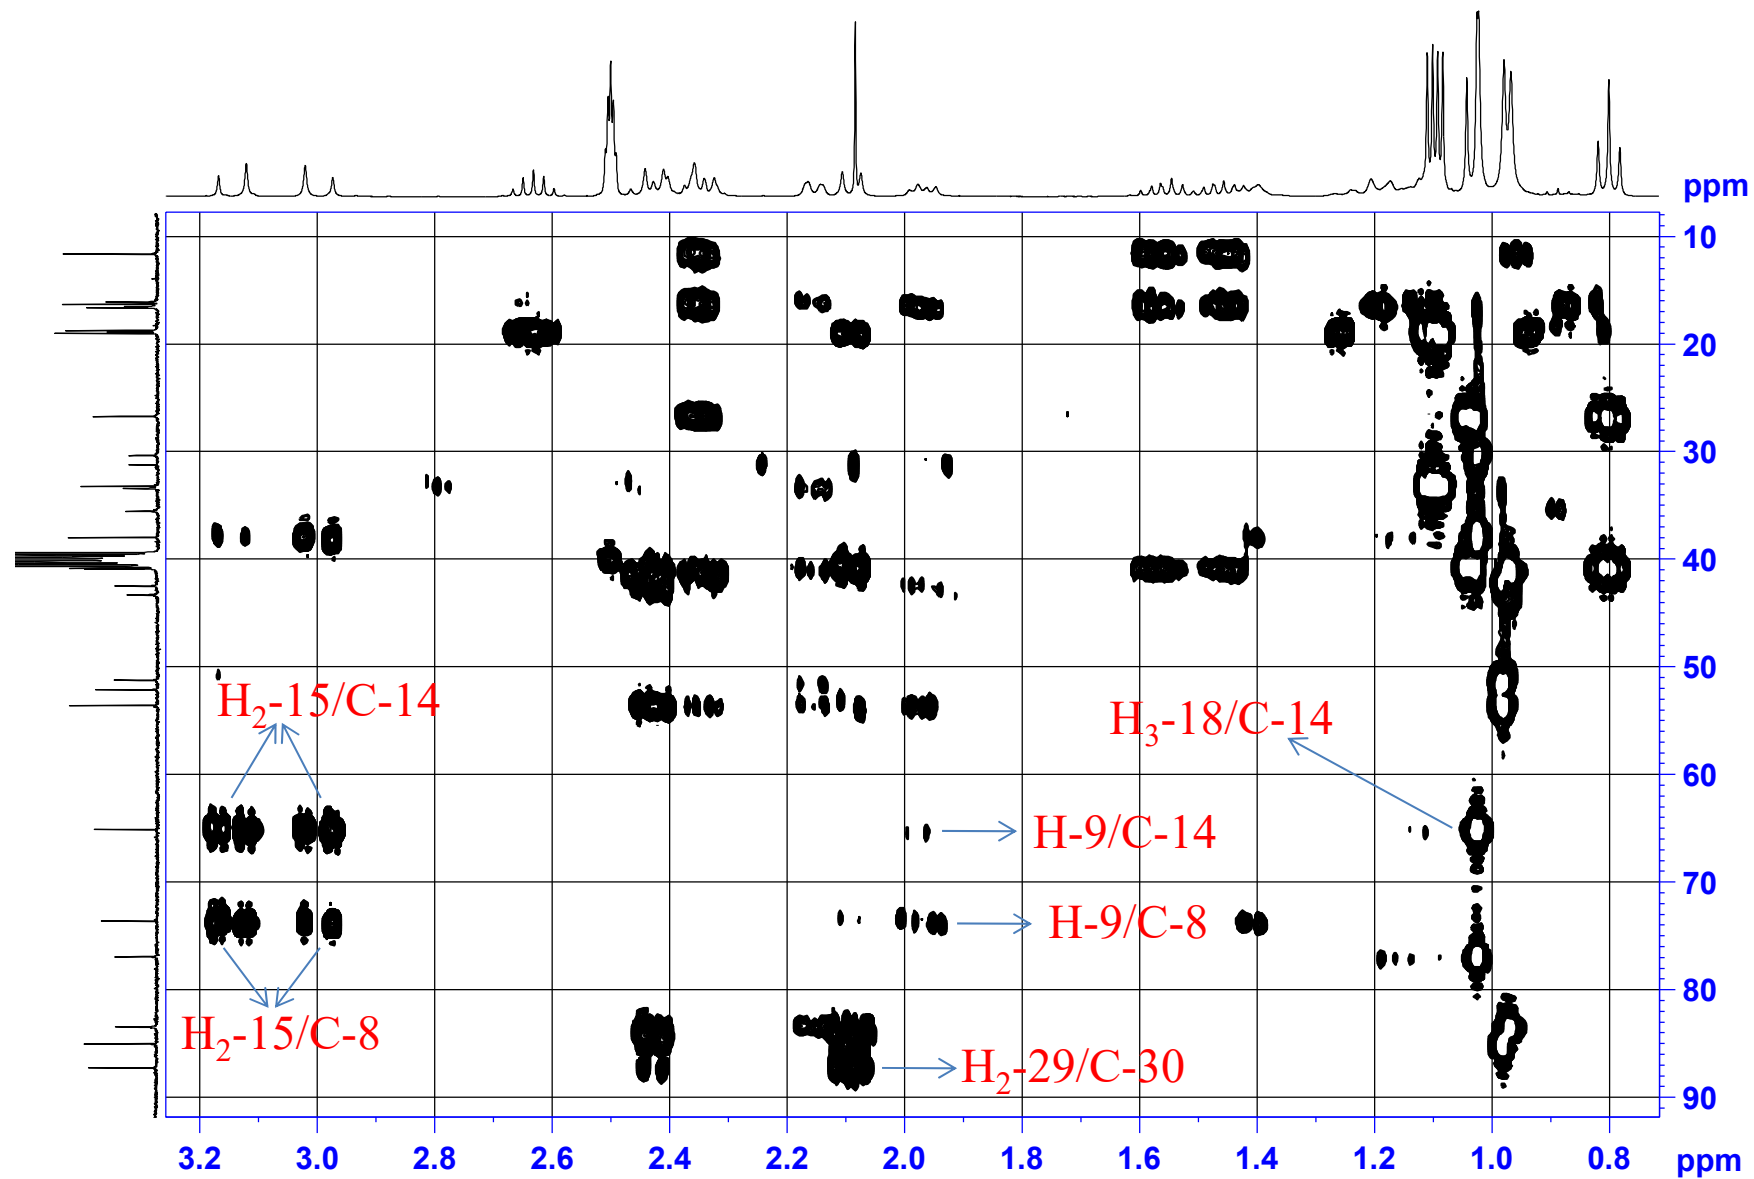

HMBC spectrum of Krishnolide A (1) in DMSO- $d_6$

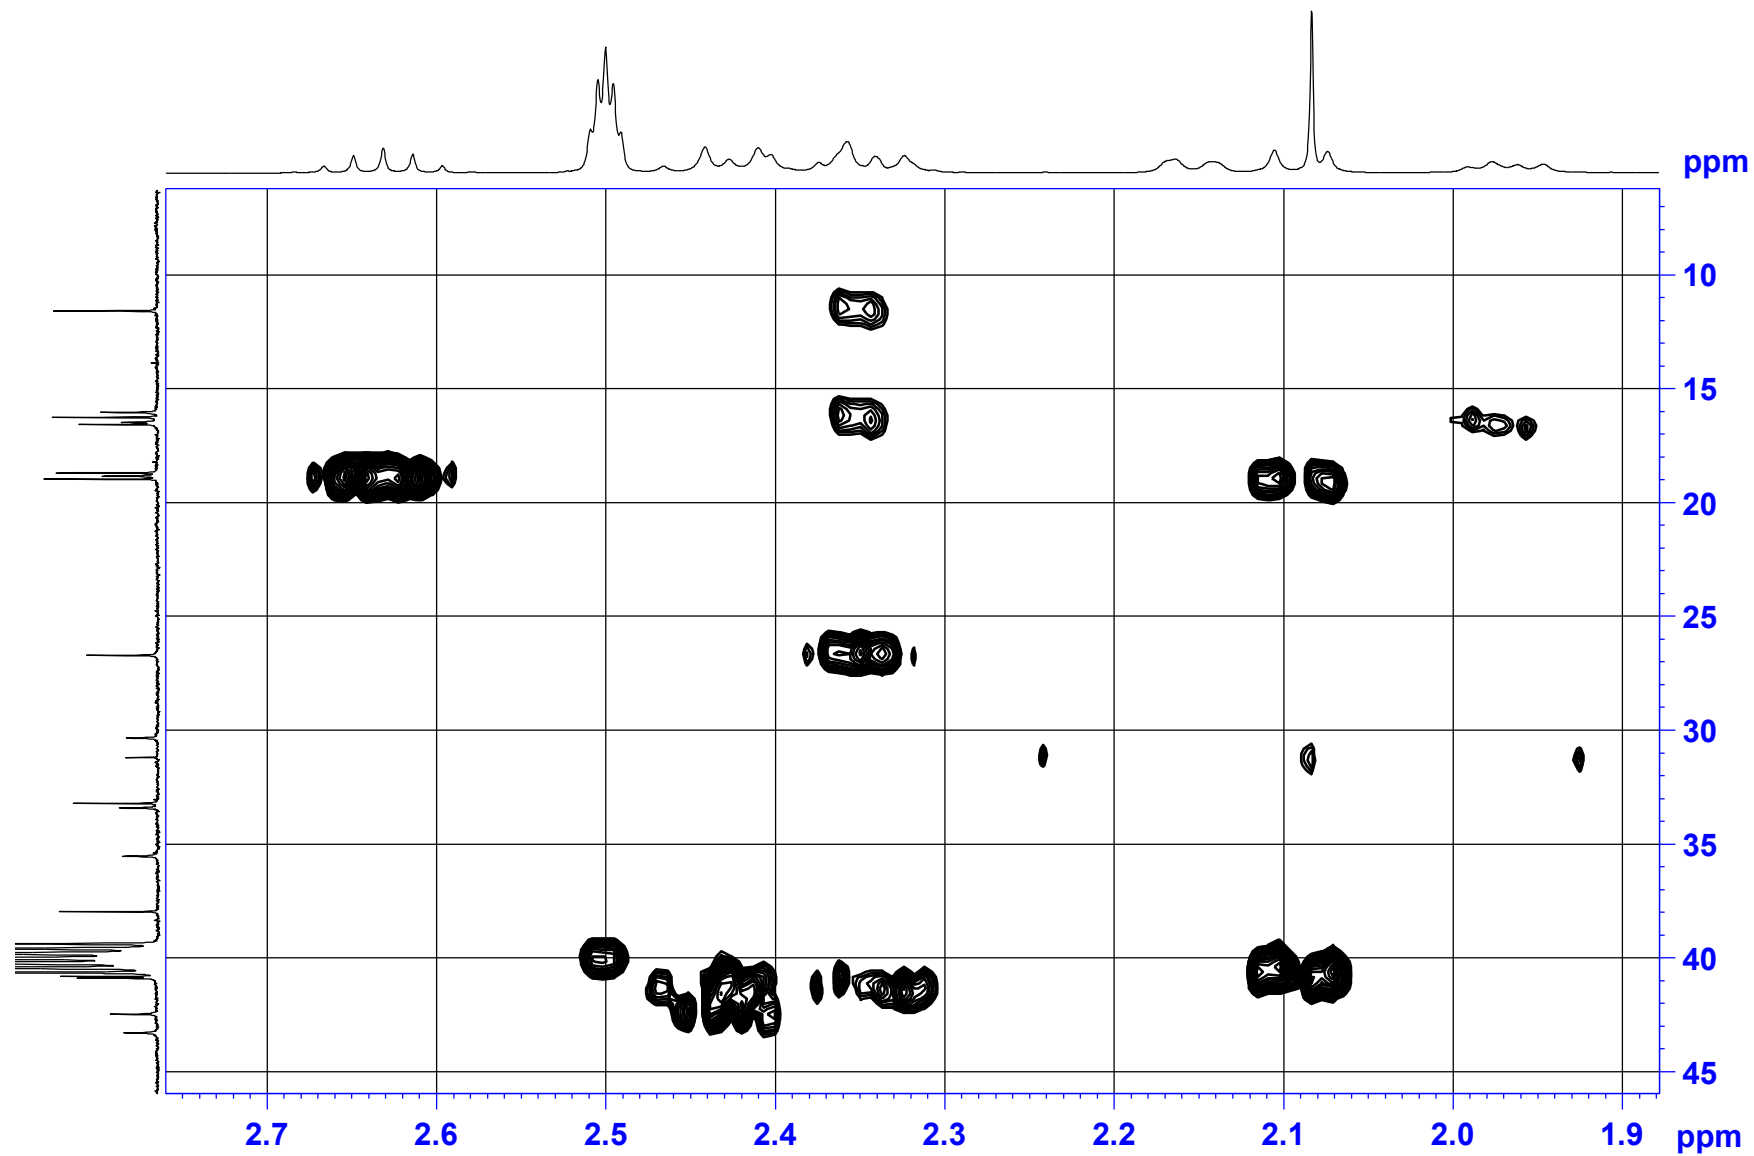

HMBC spectrum of Krishnolide A (1) in DMSO- $d_6$

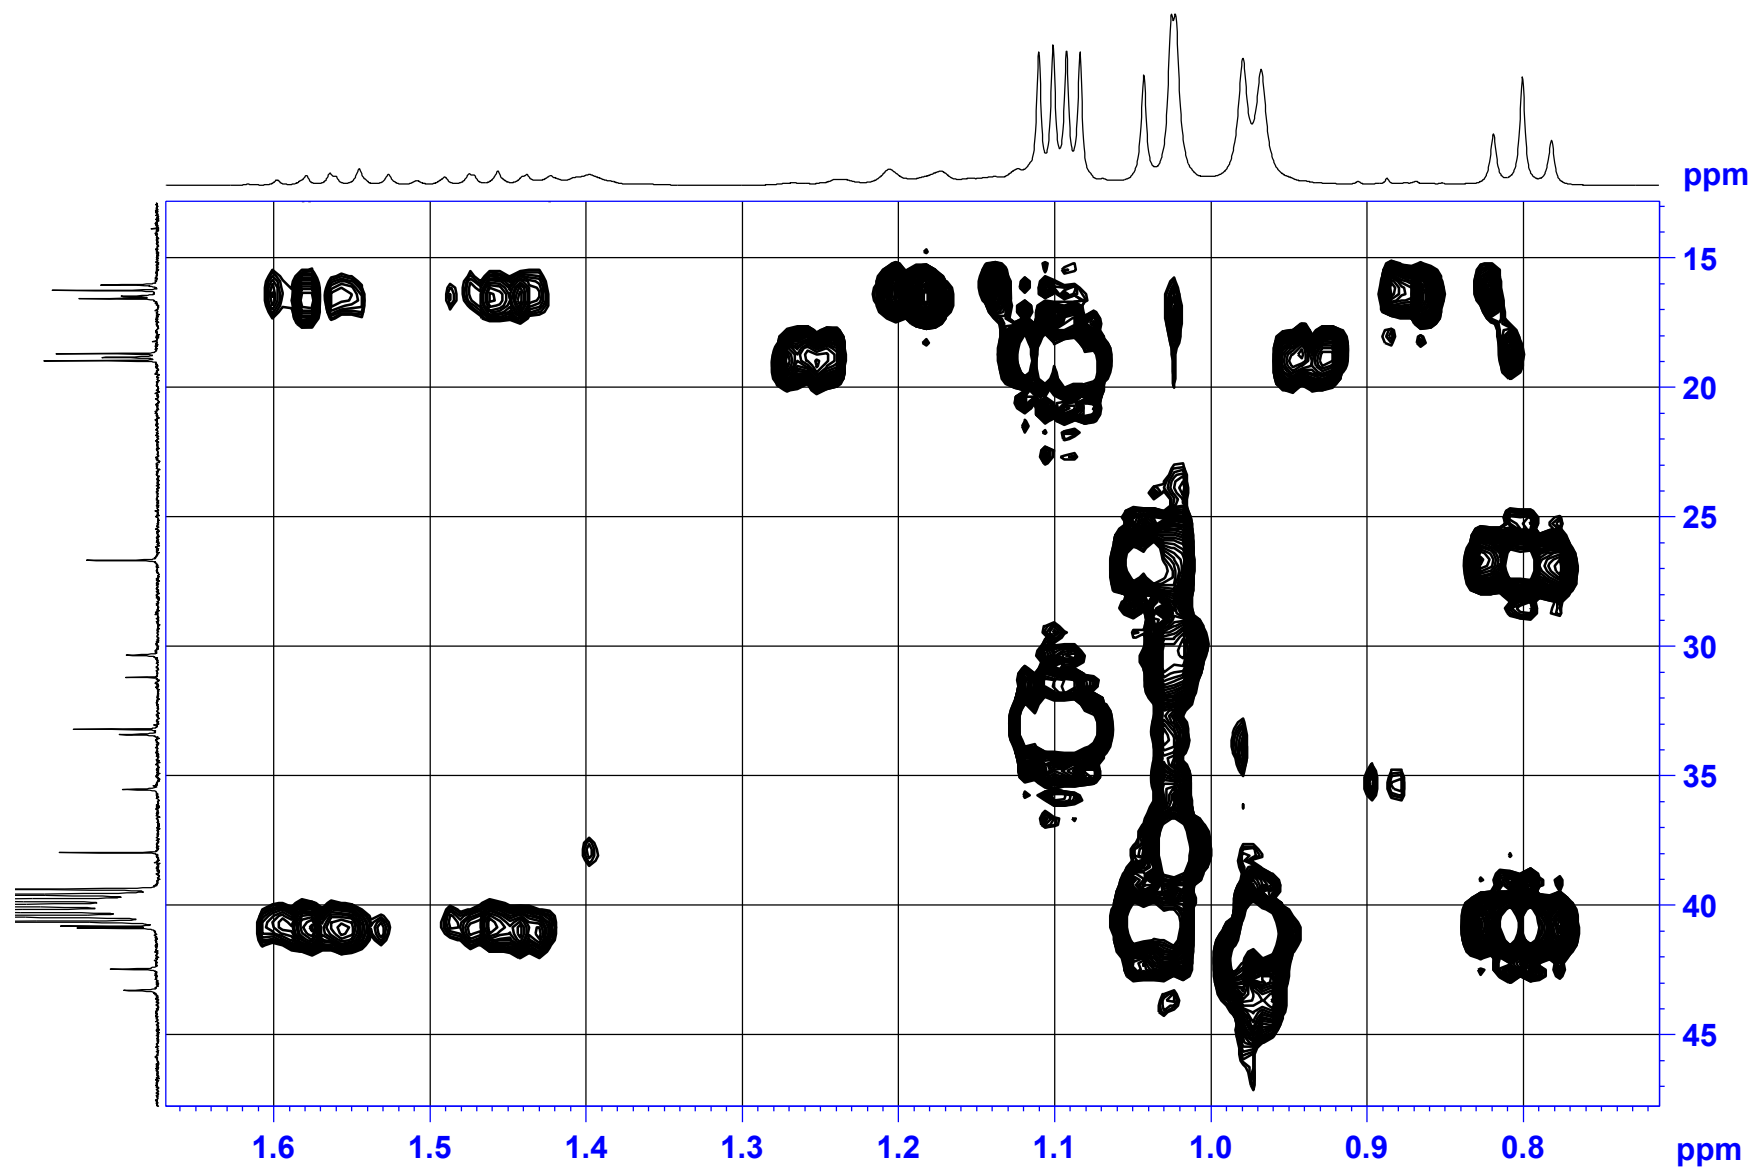



# NOESY spectrum of Krishnolide A (1) in DMSO- $d_6$

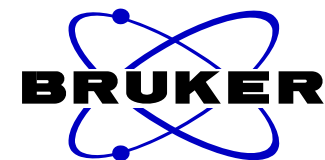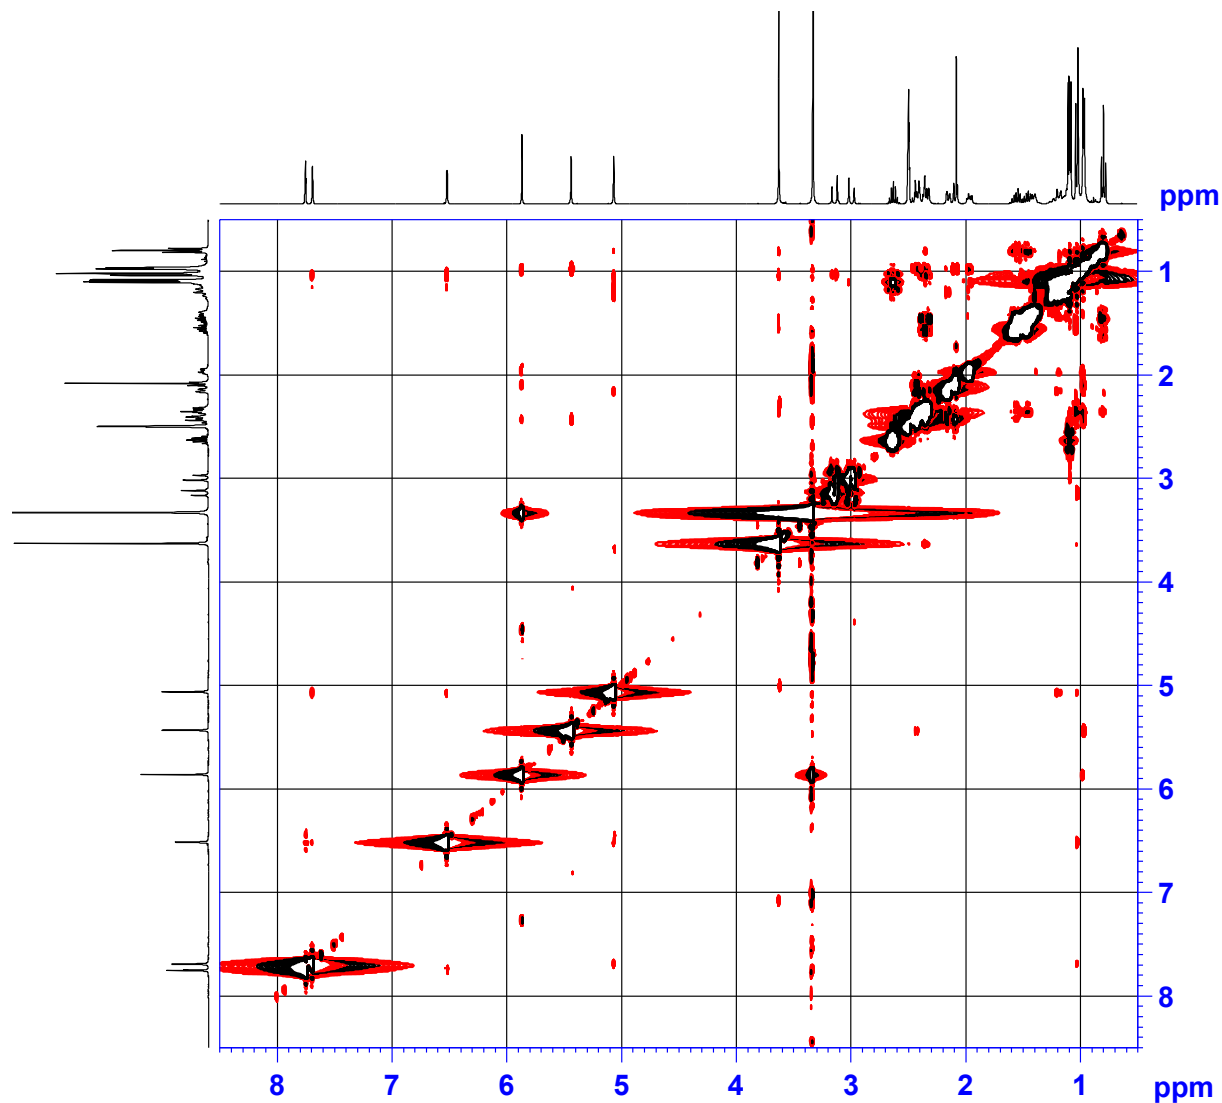

```

NAME          ZQ-17-DMSO
EXPNO         7
PROCNO        1
Date_         20170706
Time          5.18
INSTRUM       spect
PROBHD        5 mm CPPBBO BB
PULPROG       noesygpphpp
TD            2048
SOLVENT       DMSO
NS            16
DS            32
SWH           4000.000 Hz
FIDRES        1.953125 Hz
AQ            0.2560500 sec
RG            117.37
DW            125.000 usec
DE            10.00 usec
TE            297.0 K
D0            0.00011036 sec
D1            1.99385595 sec
D8            0.30000001 sec
D11           0.03000000 sec
D12           0.00002000 sec
D16           0.00020000 sec
IN0           0.00025000 sec
    
```

```

===== CHANNEL f1 =====
SFO1          400.1318006 MHz
NUC1          1H
P1            11.50 usec
P2            23.00 usec
P17           2500.00 usec
ND0           1
TD            256
SFO1          400.1318 MHz
FIDRES        15.625000 Hz
SW            9.997 ppm
FnMODE        States-TPPI
SI            1024
SF            400.1300018 MHz
WDW           QSINE
SSB           2
LB            0.00 Hz
GB            0
PC            1.00
SI            1024
MC2           States-TPPI
SF            400.1300002 MHz
WDW           QSINE
SSB           2
LB            0.00 Hz
GB            0
    
```

NOESY spectrum of Krishnolide A (1) in DMSO- $d_6$

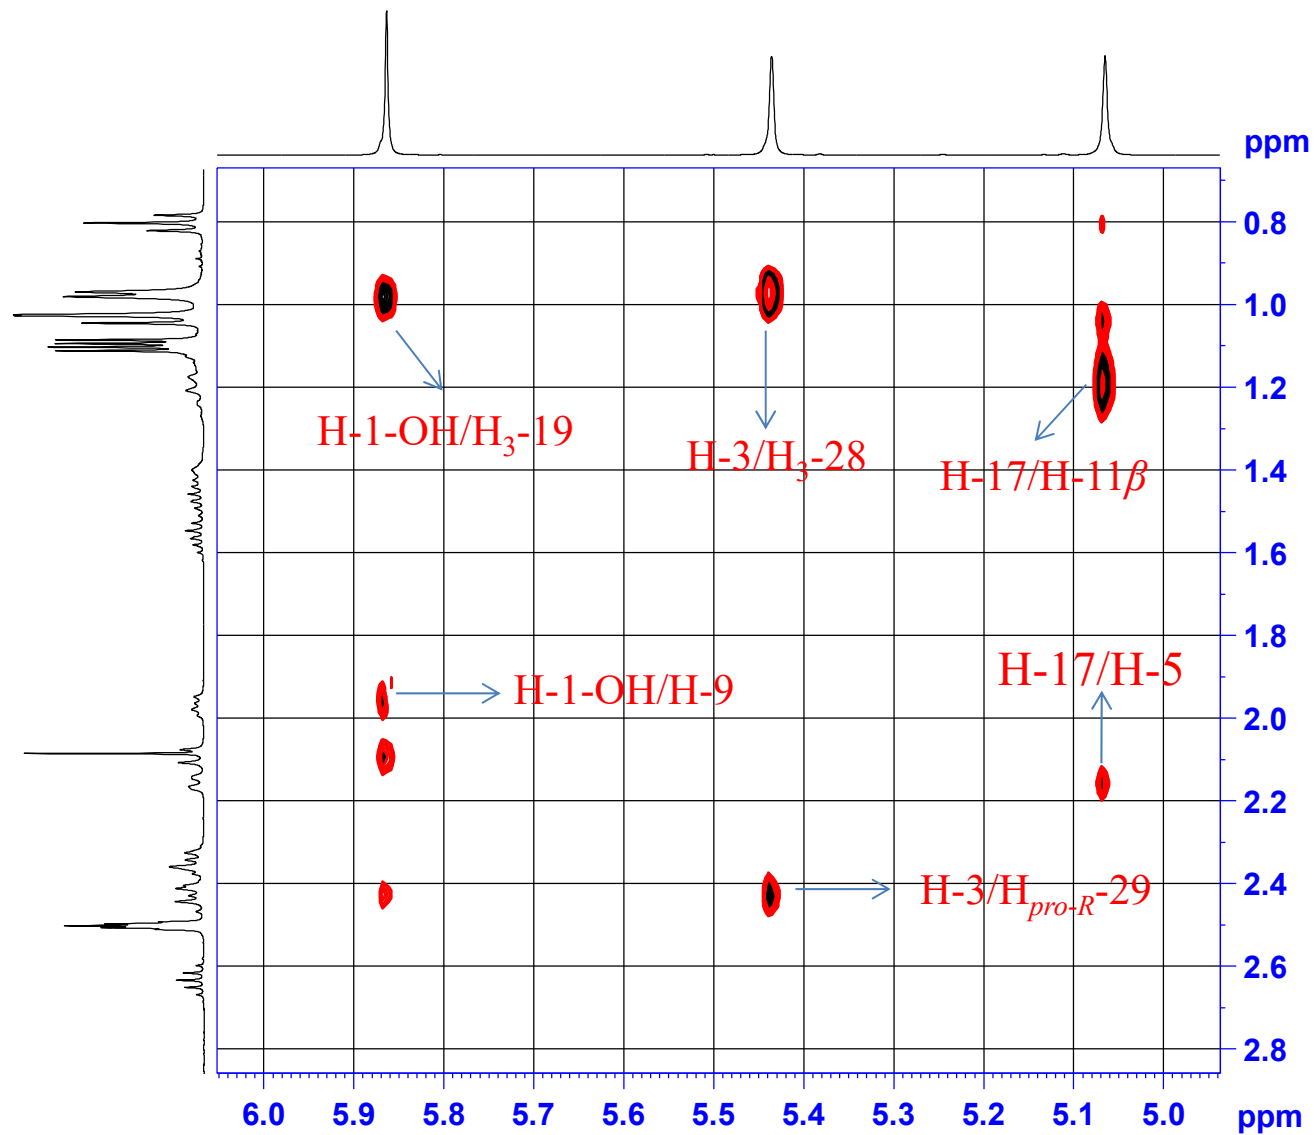

NOESY spectrum of Krishnolide A (**1**) in DMSO- $d_6$

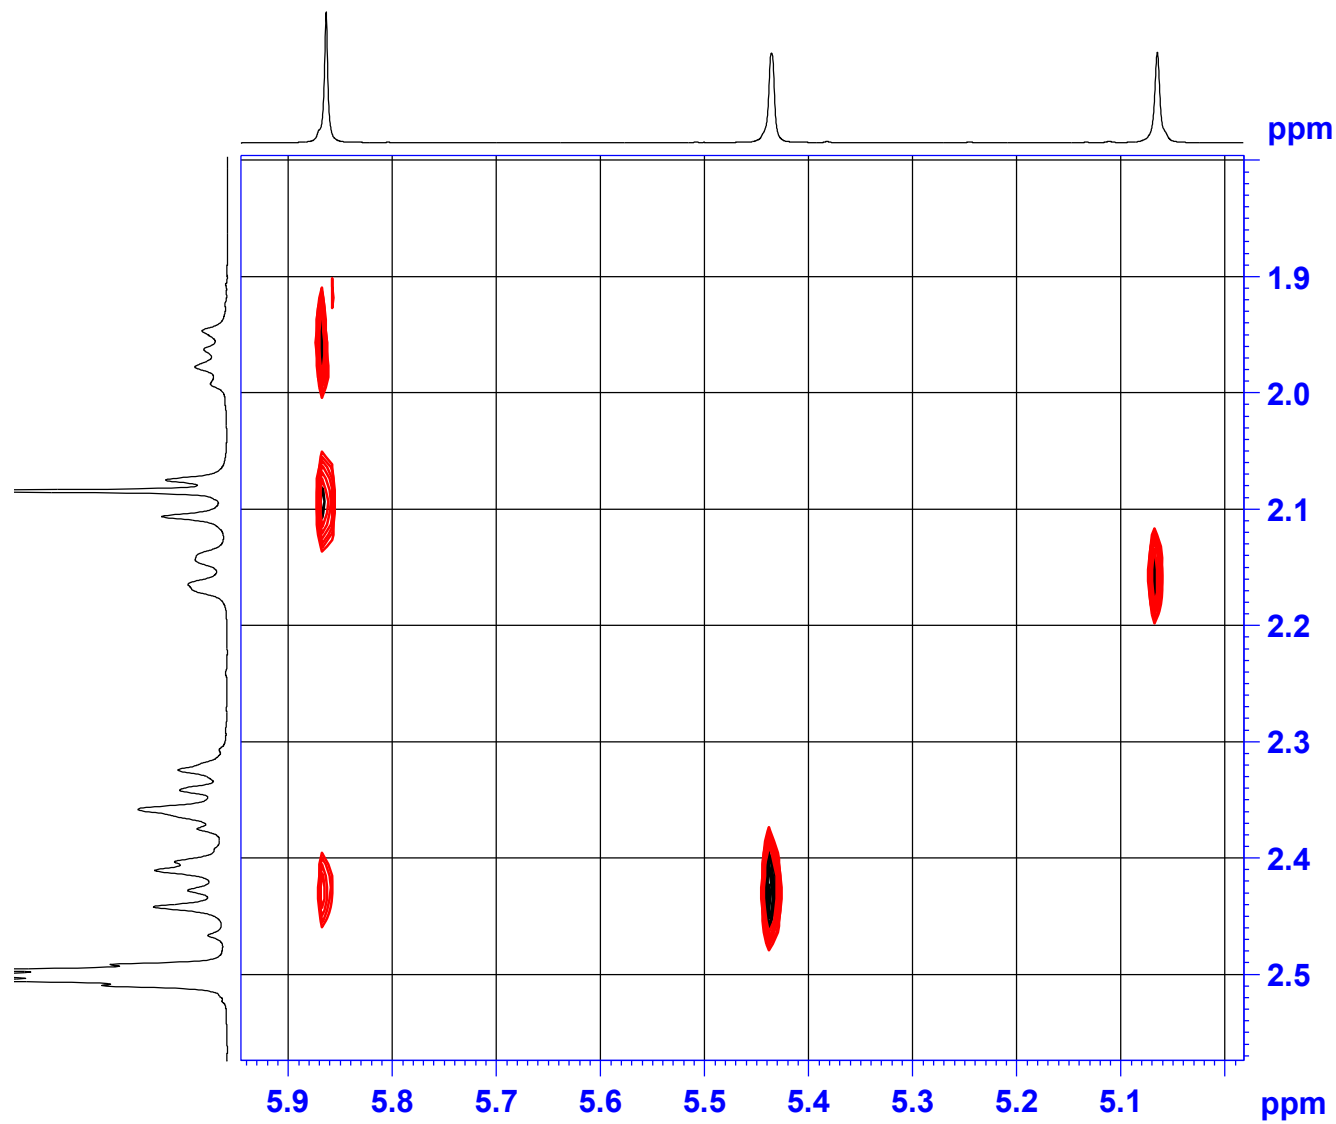

NOESY spectrum of Krishnolide A (**1**) in DMSO- $d_6$

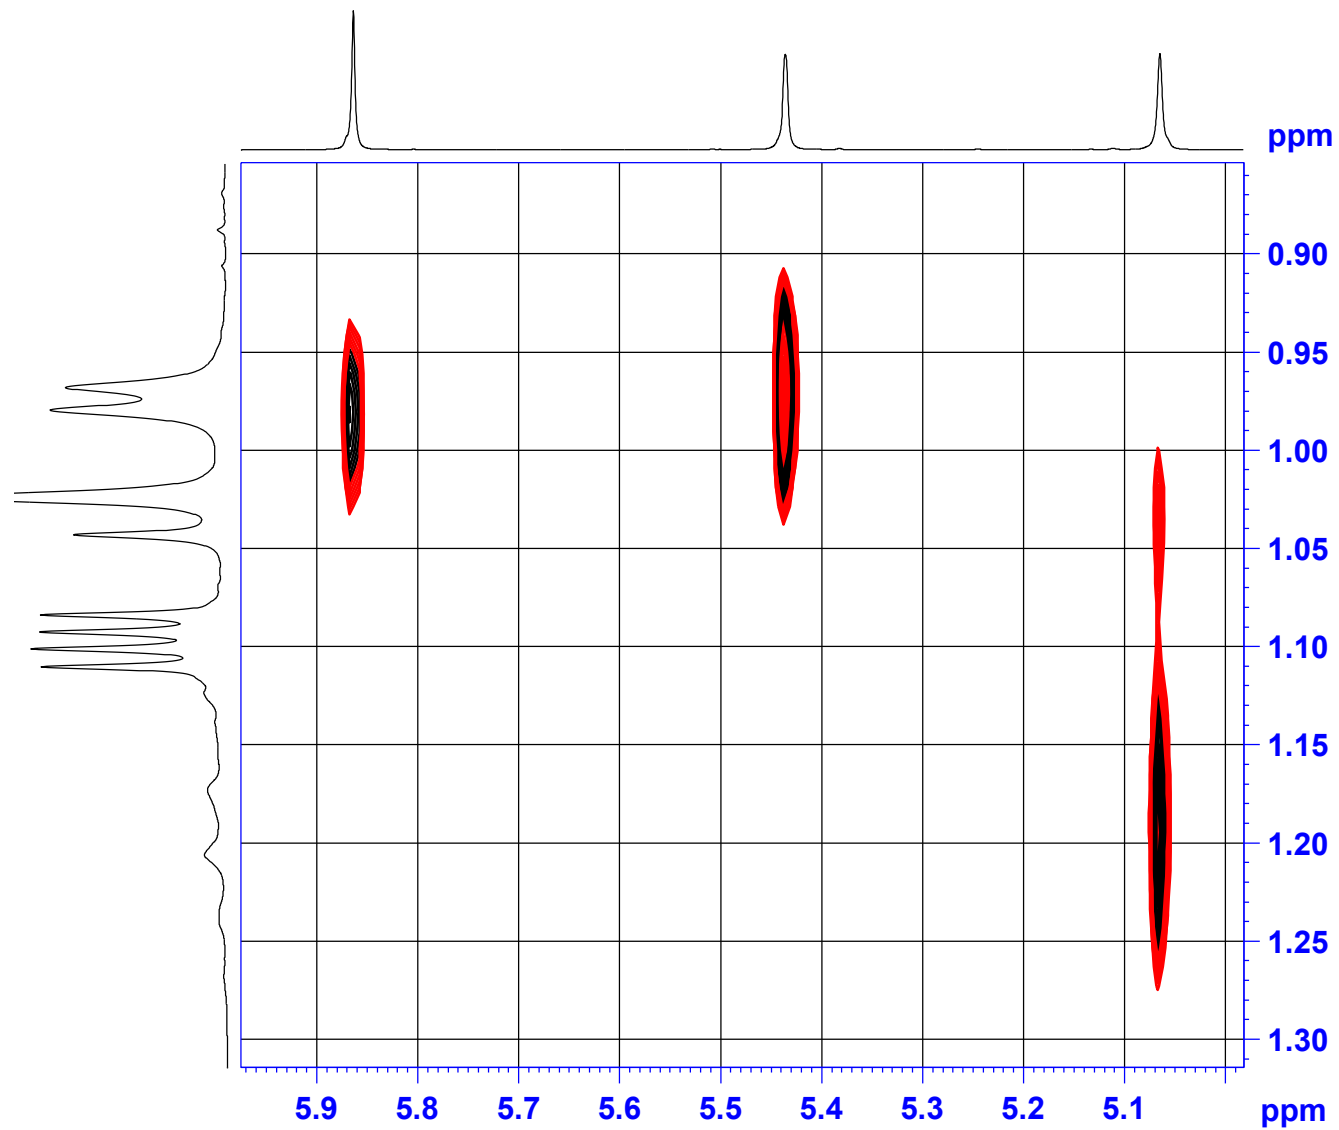

NOESY spectrum of Krishnolide A (1) in DMSO- $d_6$

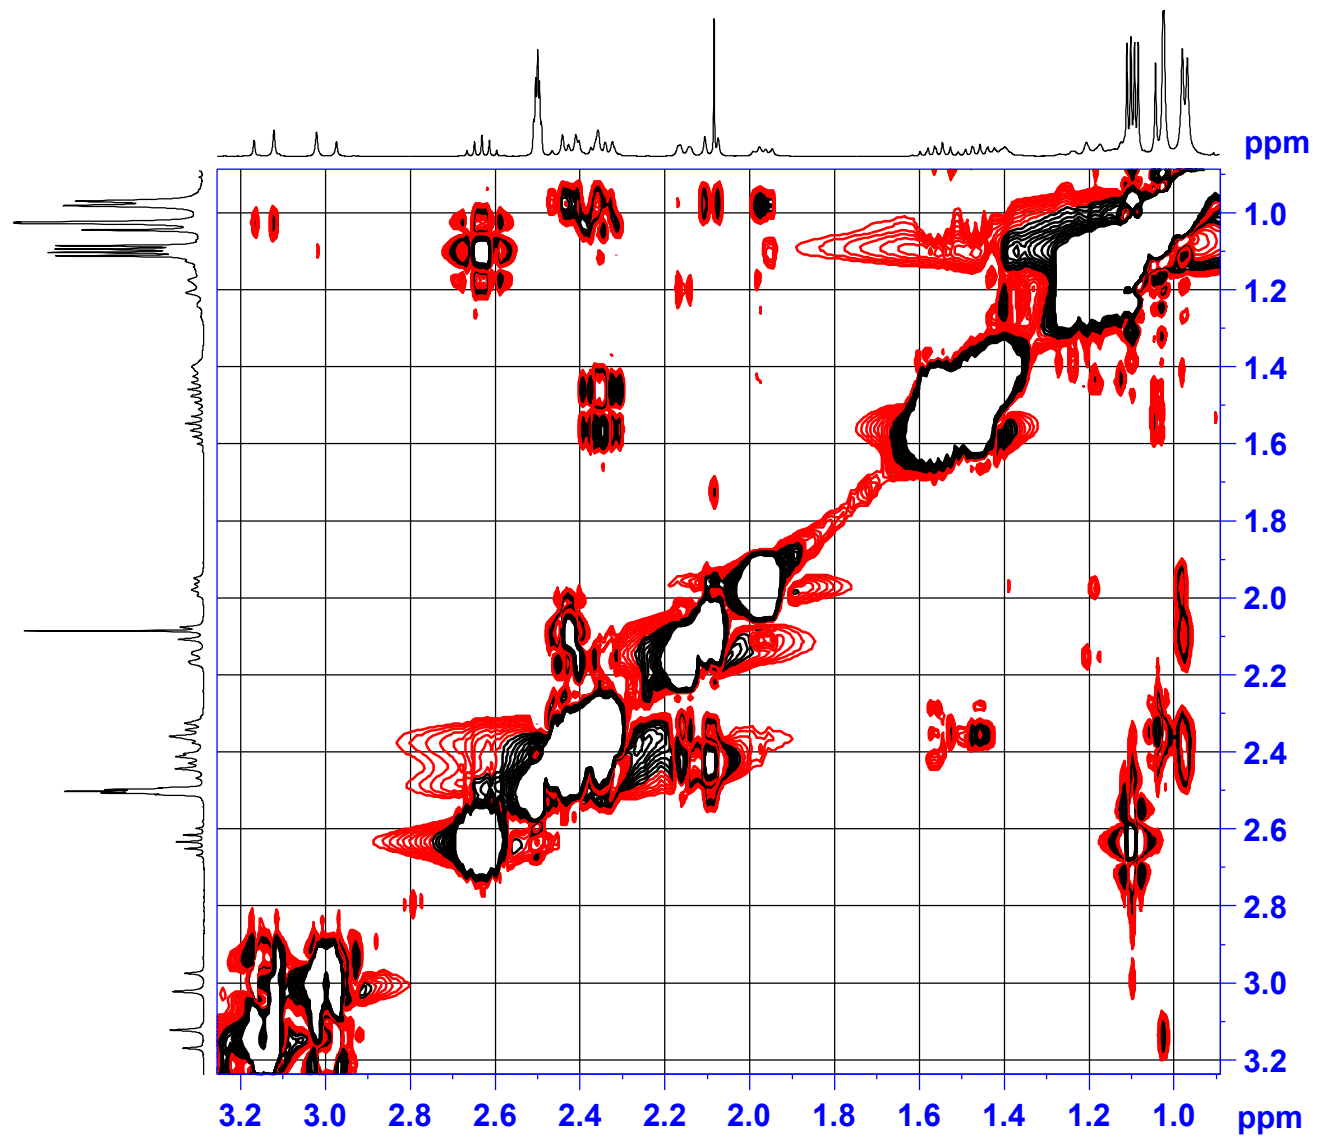

NOESY spectrum of Krishnolide A (1) in DMSO- $d_6$

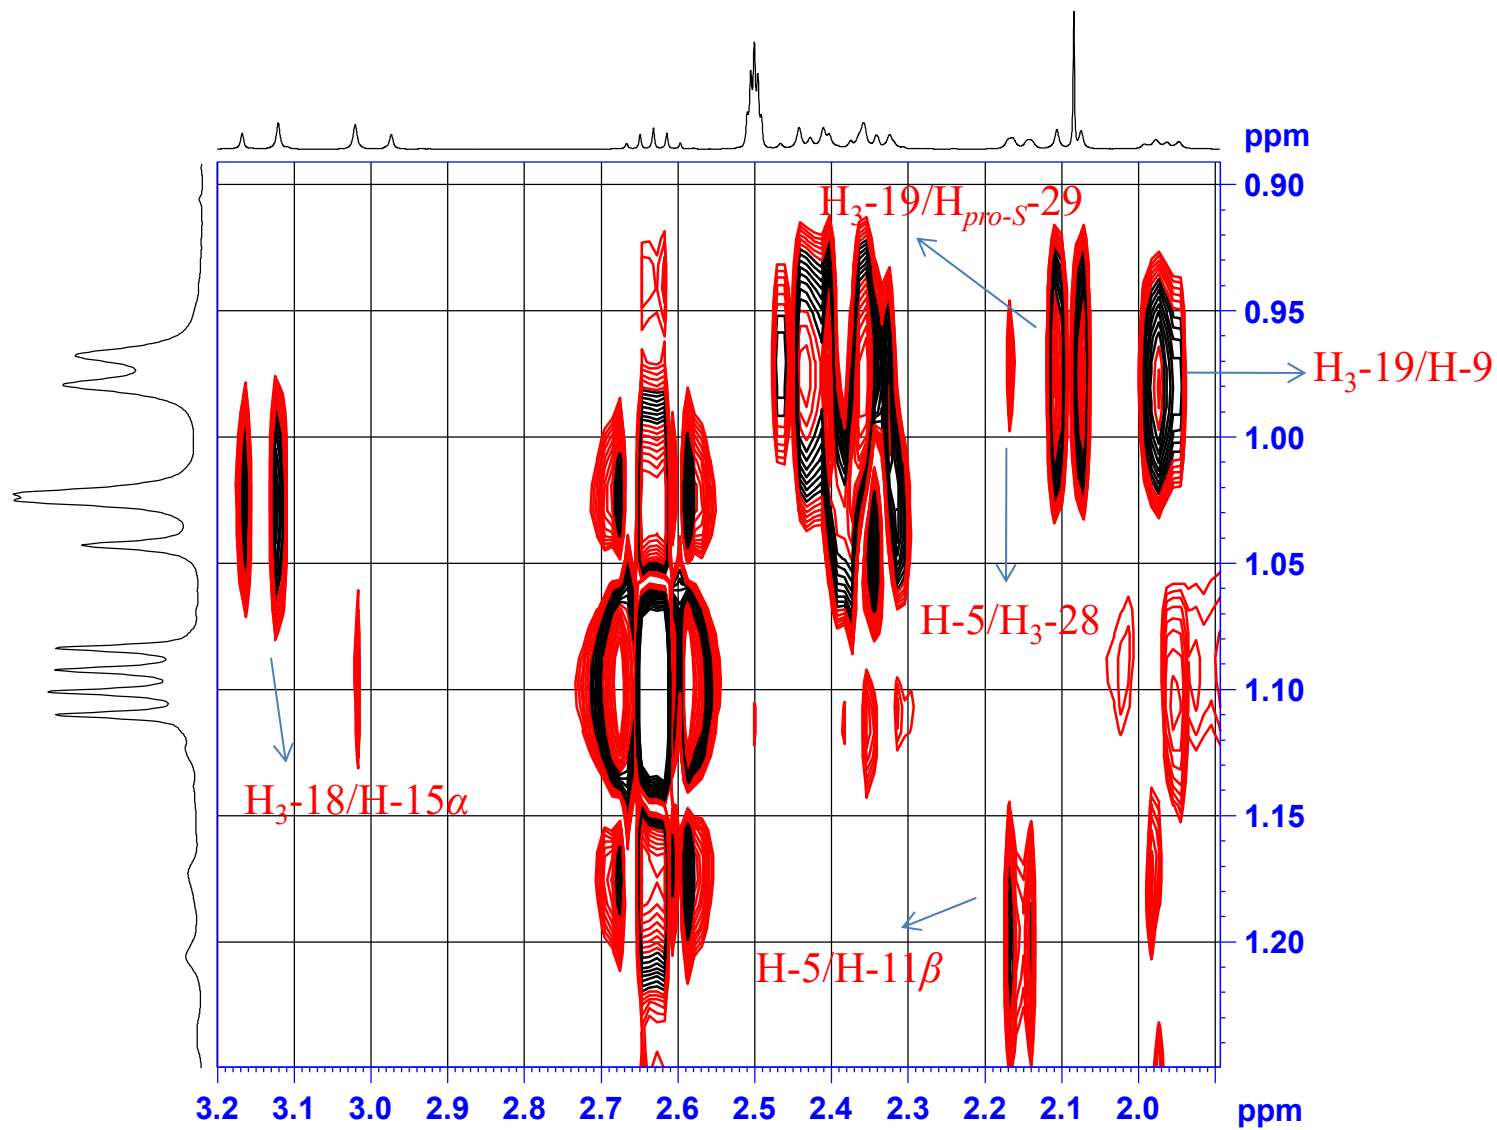

# HR-ESIMS of Krishnolide B (2)

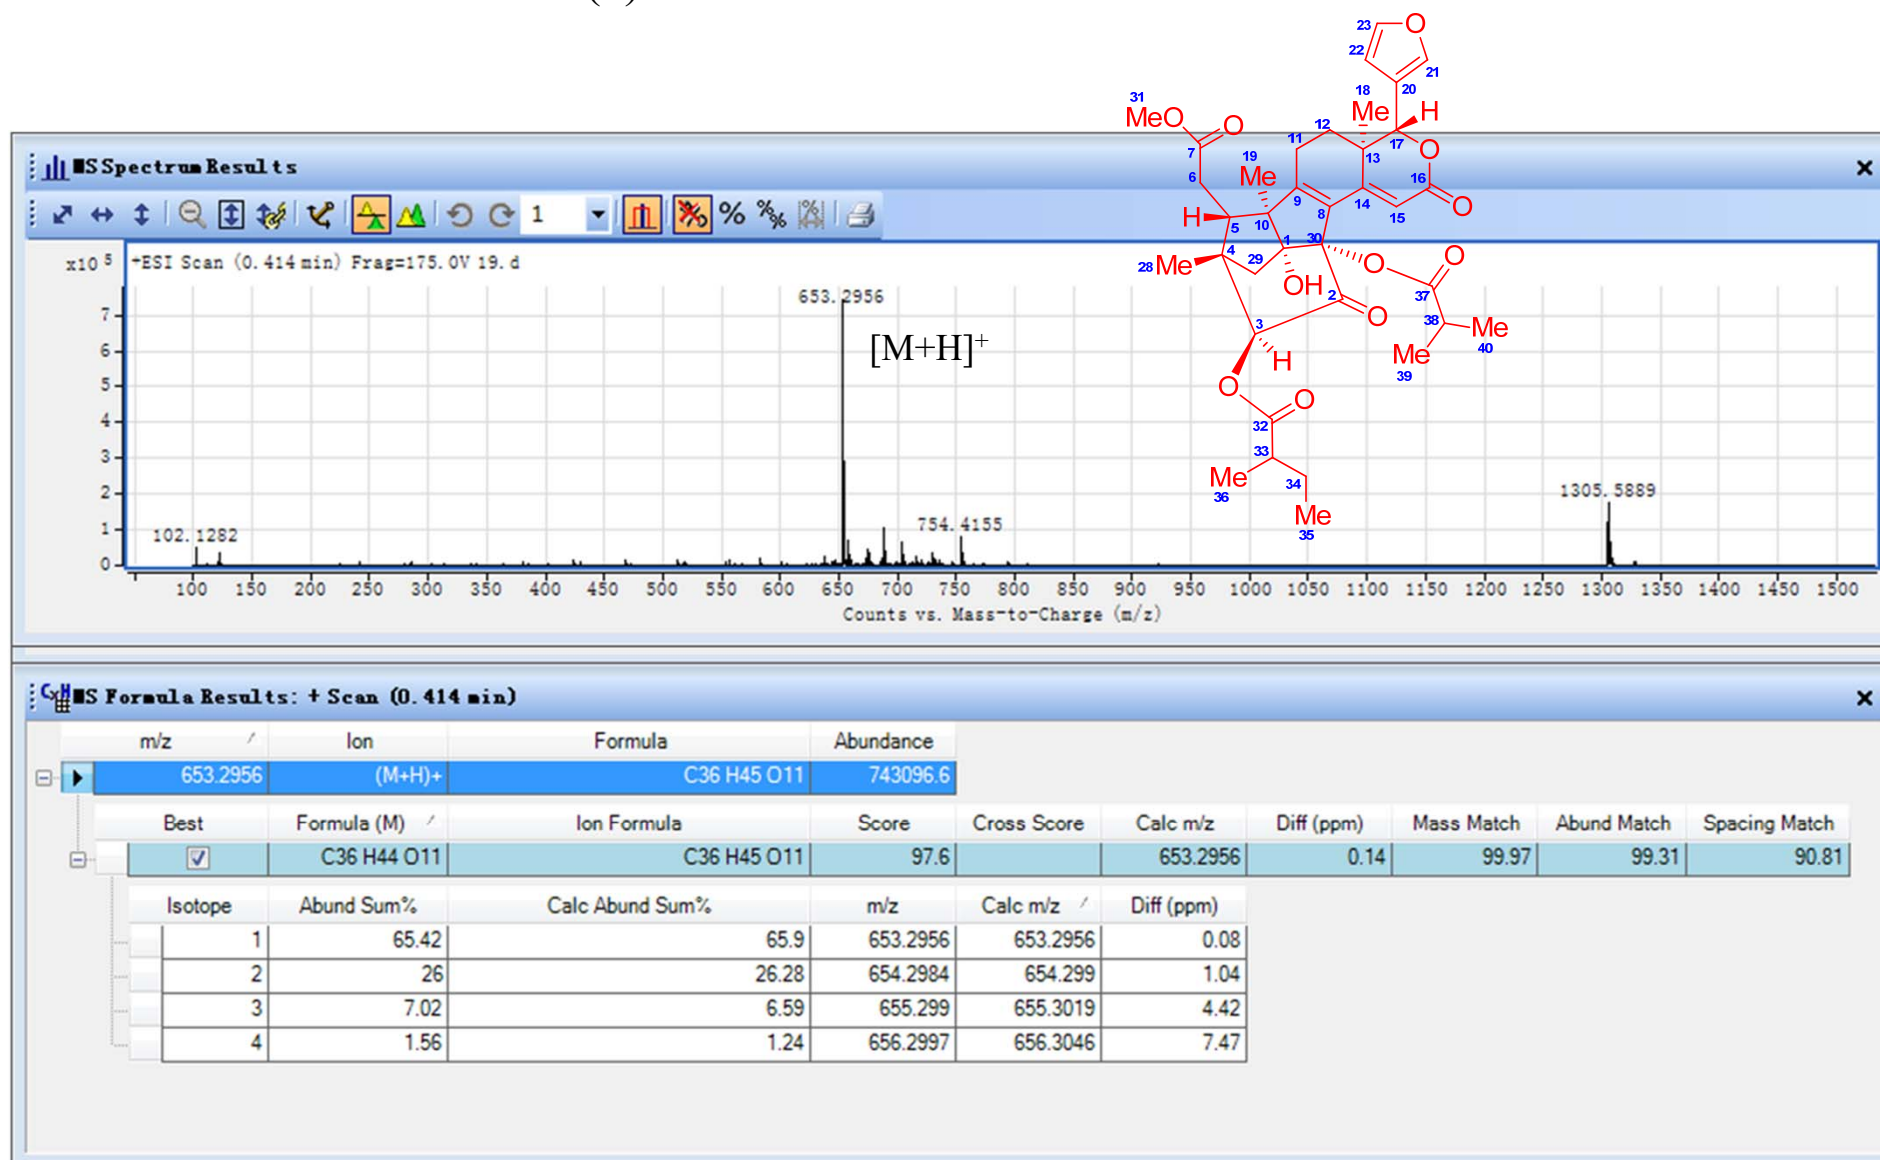

# UV spectrum of Krishnolide B (2) in MeCN

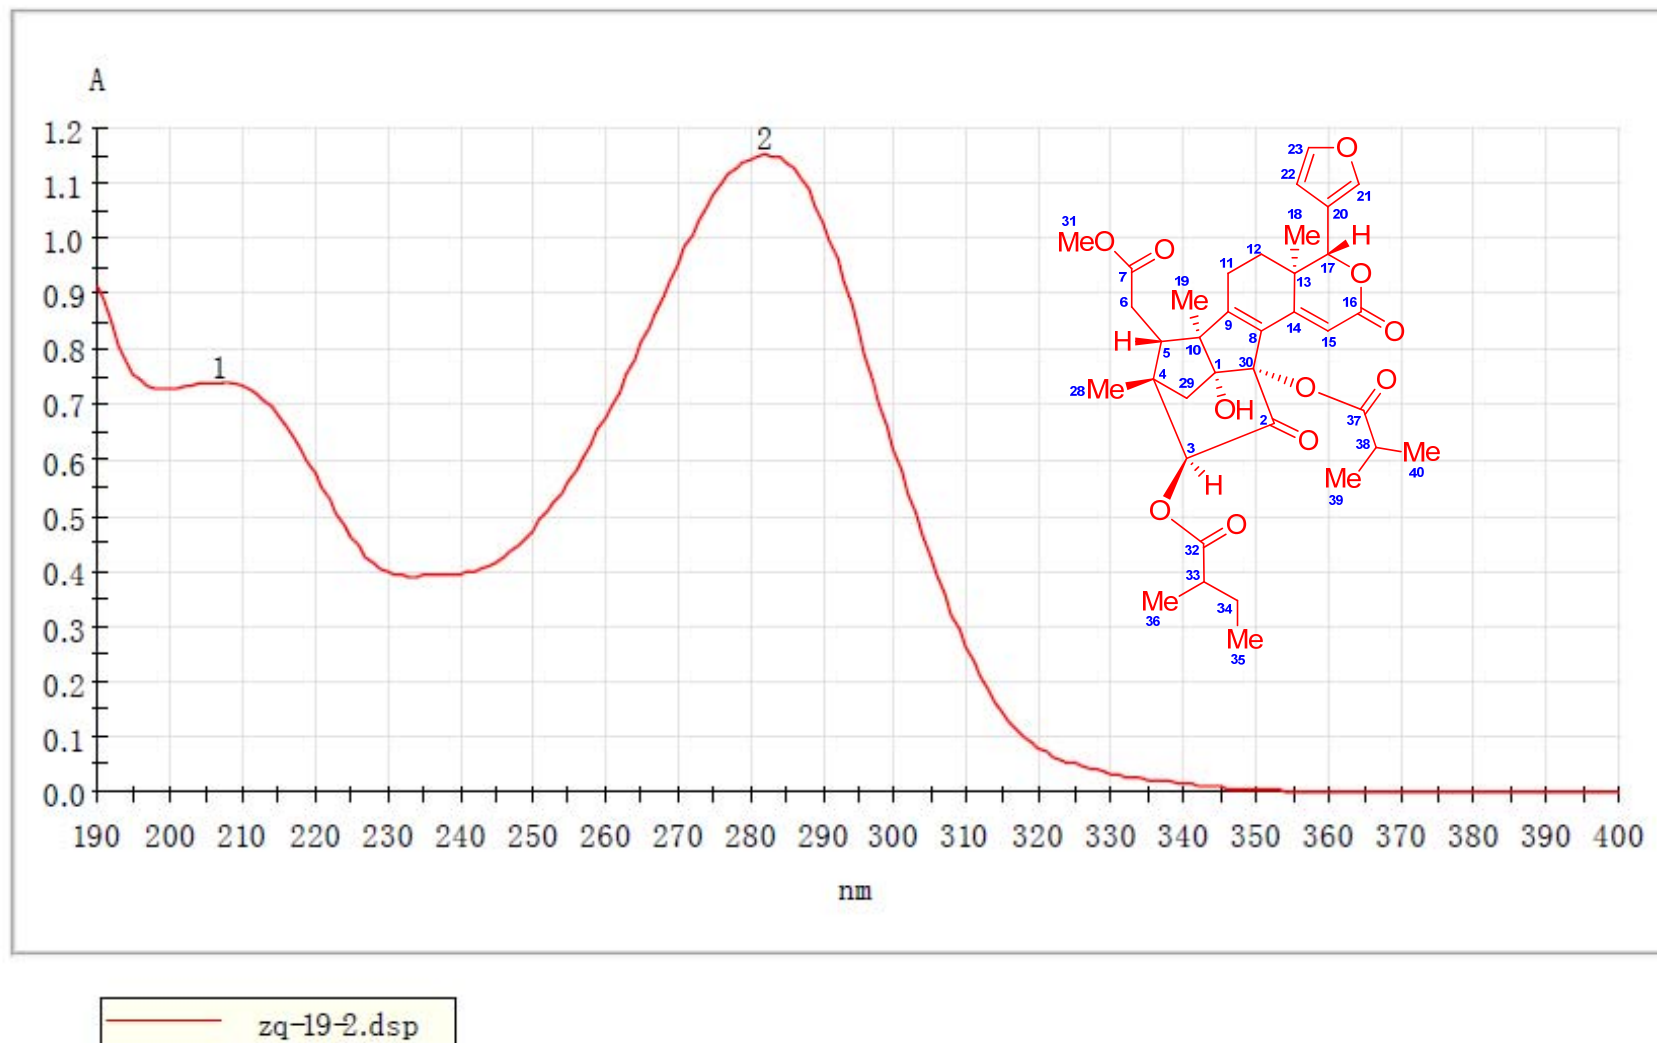



<sup>1</sup>H NMR (400 MHz) spectrum of Krishnolide B (2) in CDCl<sub>3</sub>

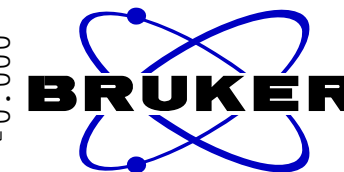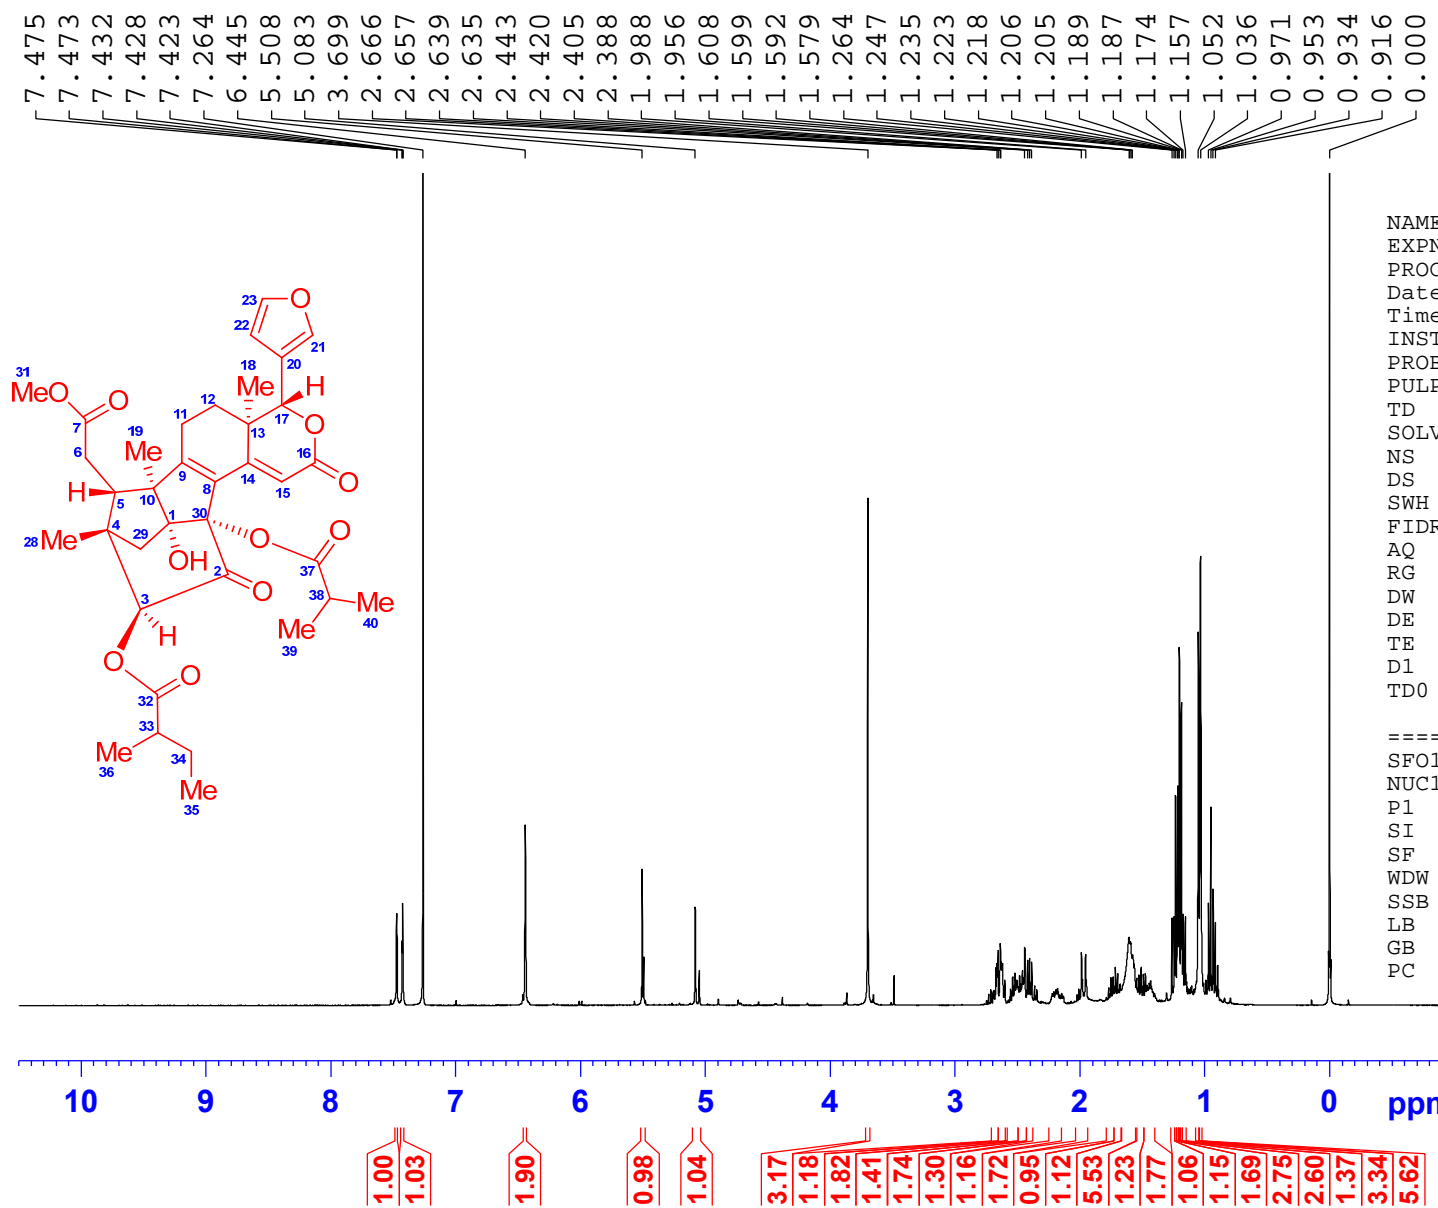

```

NAME                ZQ-19
EXPNO                1
PROCNO              1
Date_                20170119
Time                23.08
INSTRUM             spect
PROBHD              5 mm CPPBBO BB
PULPROG             zg30
TD                  65536
SOLVENT             CDCl3
NS                  16
DS                  2
SWH                 8223.685 Hz
FIDRES              0.125483 Hz
AQ                  3.9846387 sec
RG                  208.5
DW                  60.800 usec
DE                  10.00 usec
TE                  297.0 K
D1                  1.00000000 sec
TD0                 1

===== CHANNEL f1 =====
SFO1                400.1324710 MHz
NUC1                 1H
P1                   11.50 usec
SI                   65536
SF                   400.1300081 MHz
WDW                  EM
SSB                  0
LB                   0.30 Hz
GB                   0
PC                   1.00
    
```

$^1\text{H}$  NMR (400 MHz) spectrum of Krishnolide B (**2**) in  $\text{CDCl}_3$

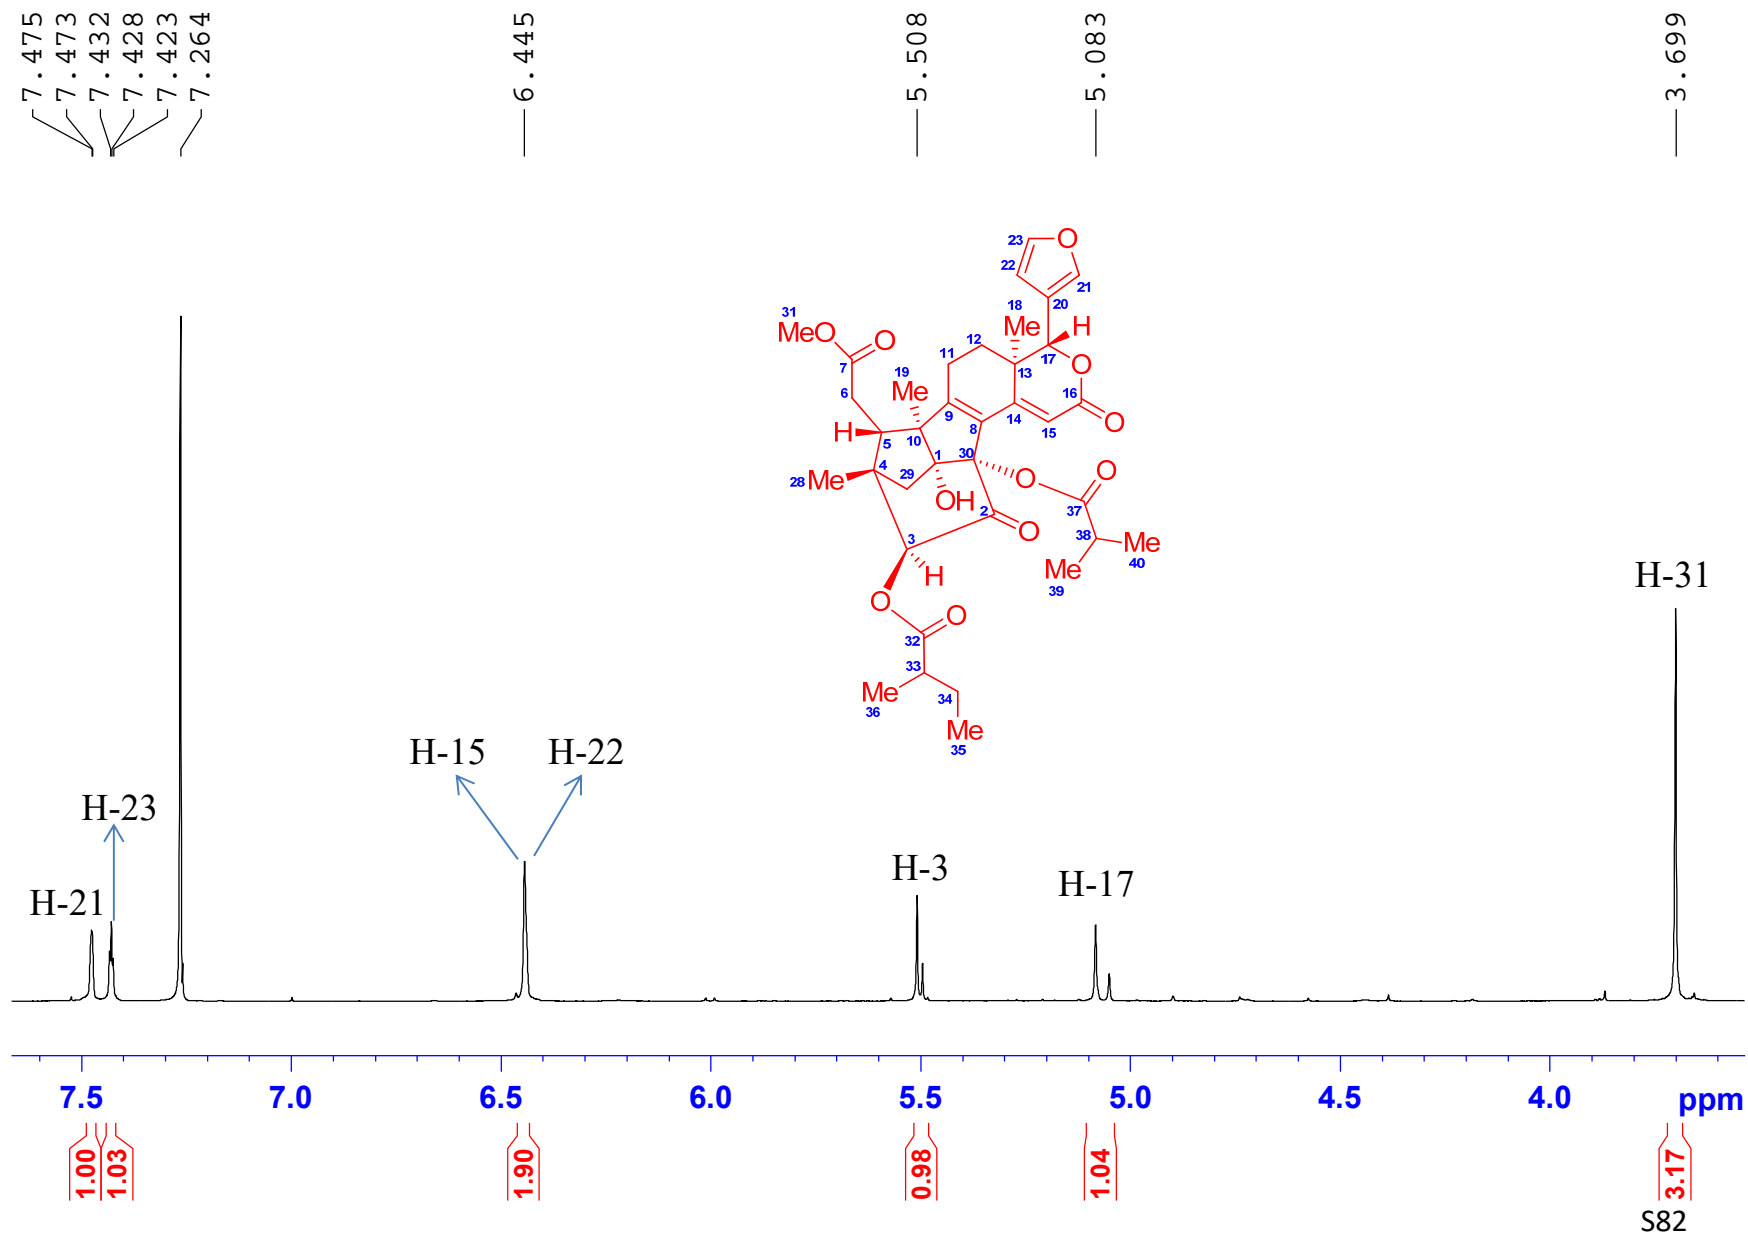

$^1\text{H}$  NMR (400 MHz) spectrum of Krishnolide B (**2**) in  $\text{CDCl}_3$

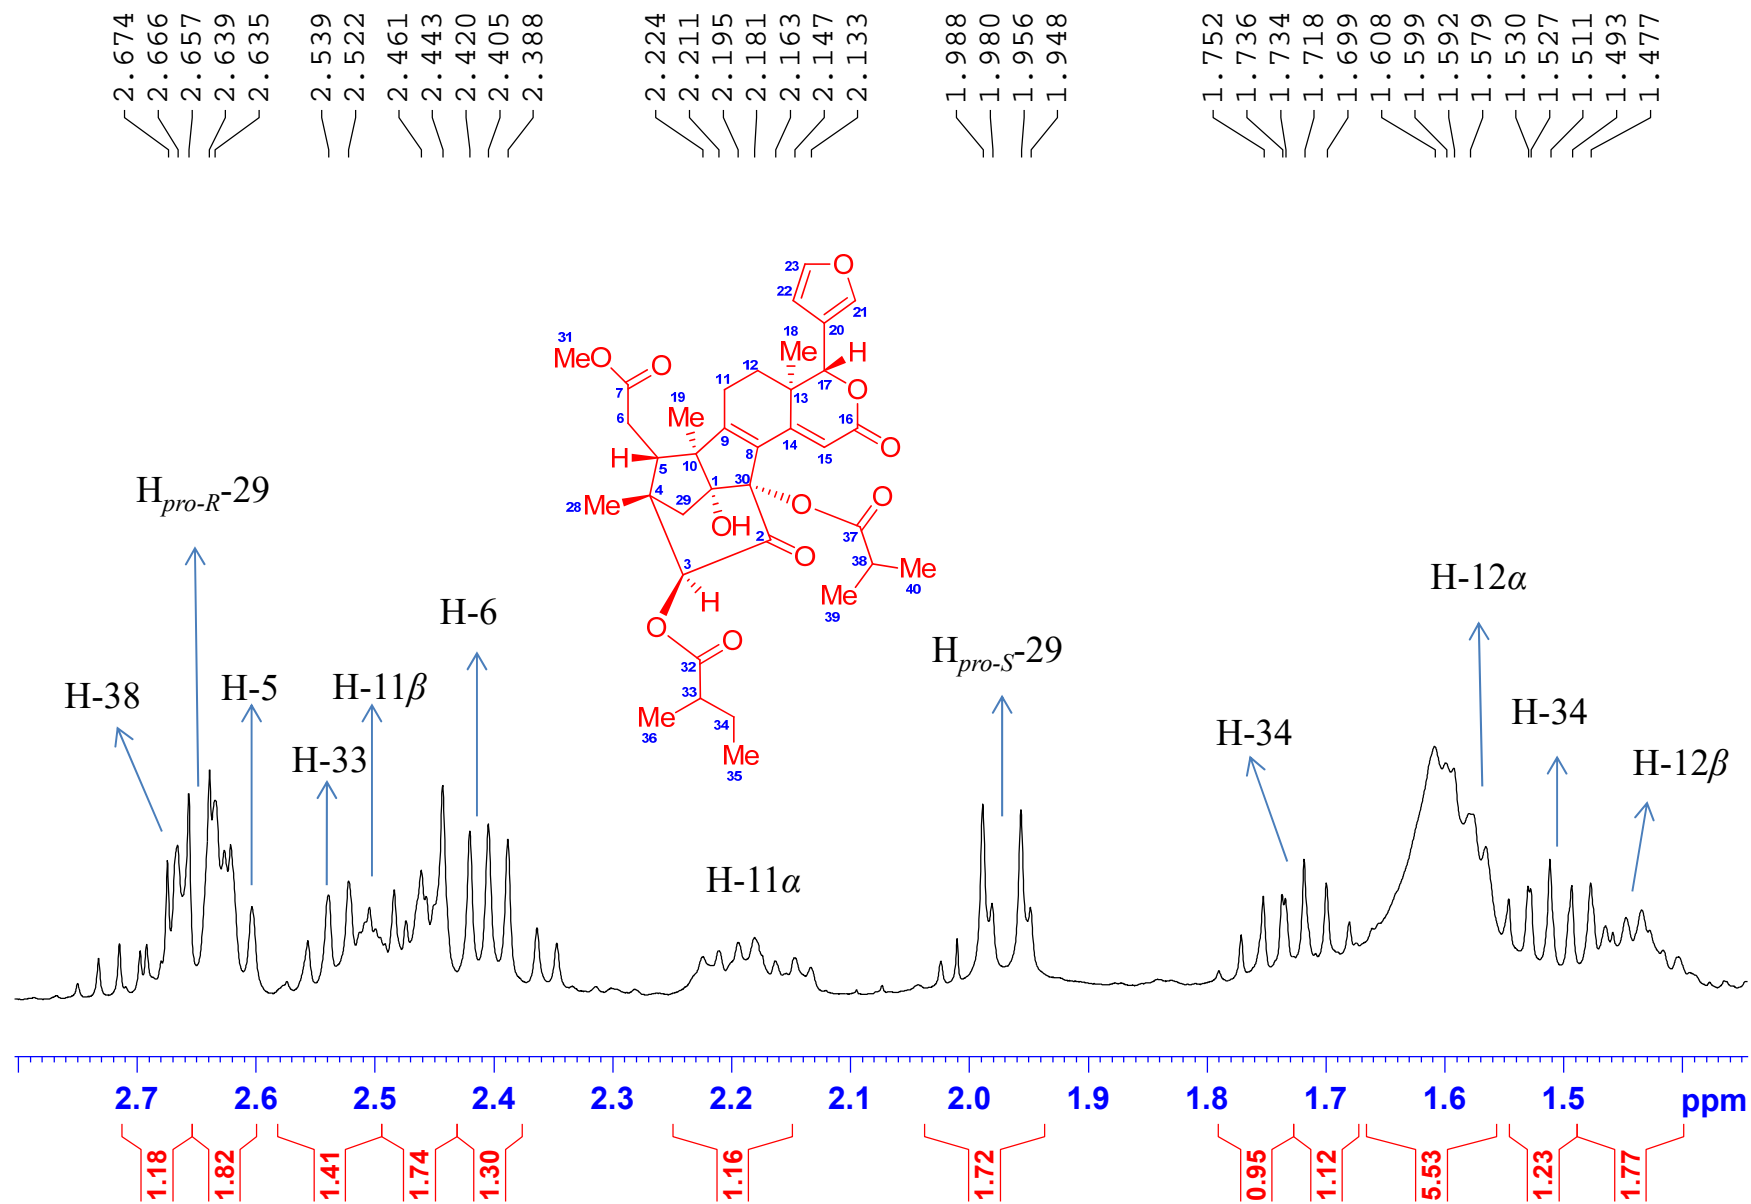

$^1\text{H}$  NMR (400 MHz) spectrum of Krishnolide B (**2**) in  $\text{CDCl}_3$

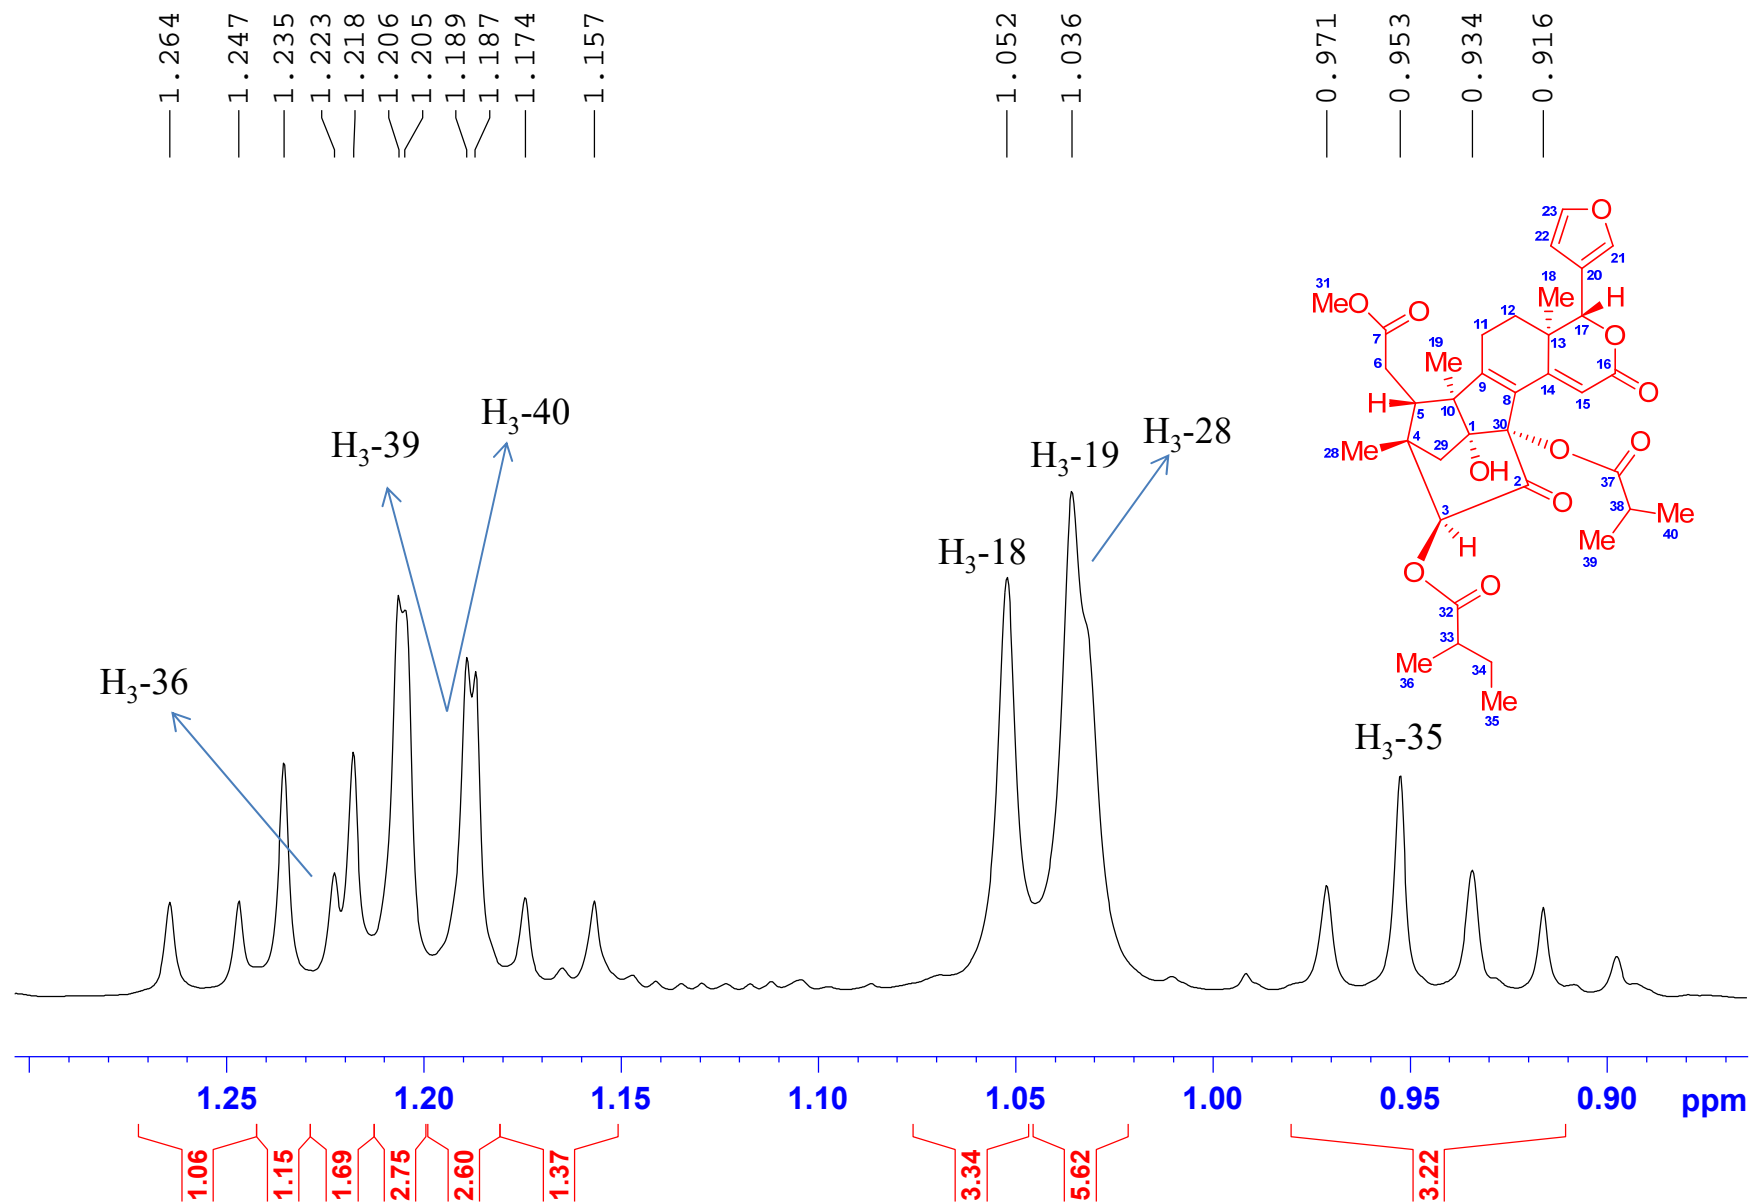

<sup>13</sup>C NMR (100 MHz) spectrum of Krishnolide B (2) in CDCl<sub>3</sub>

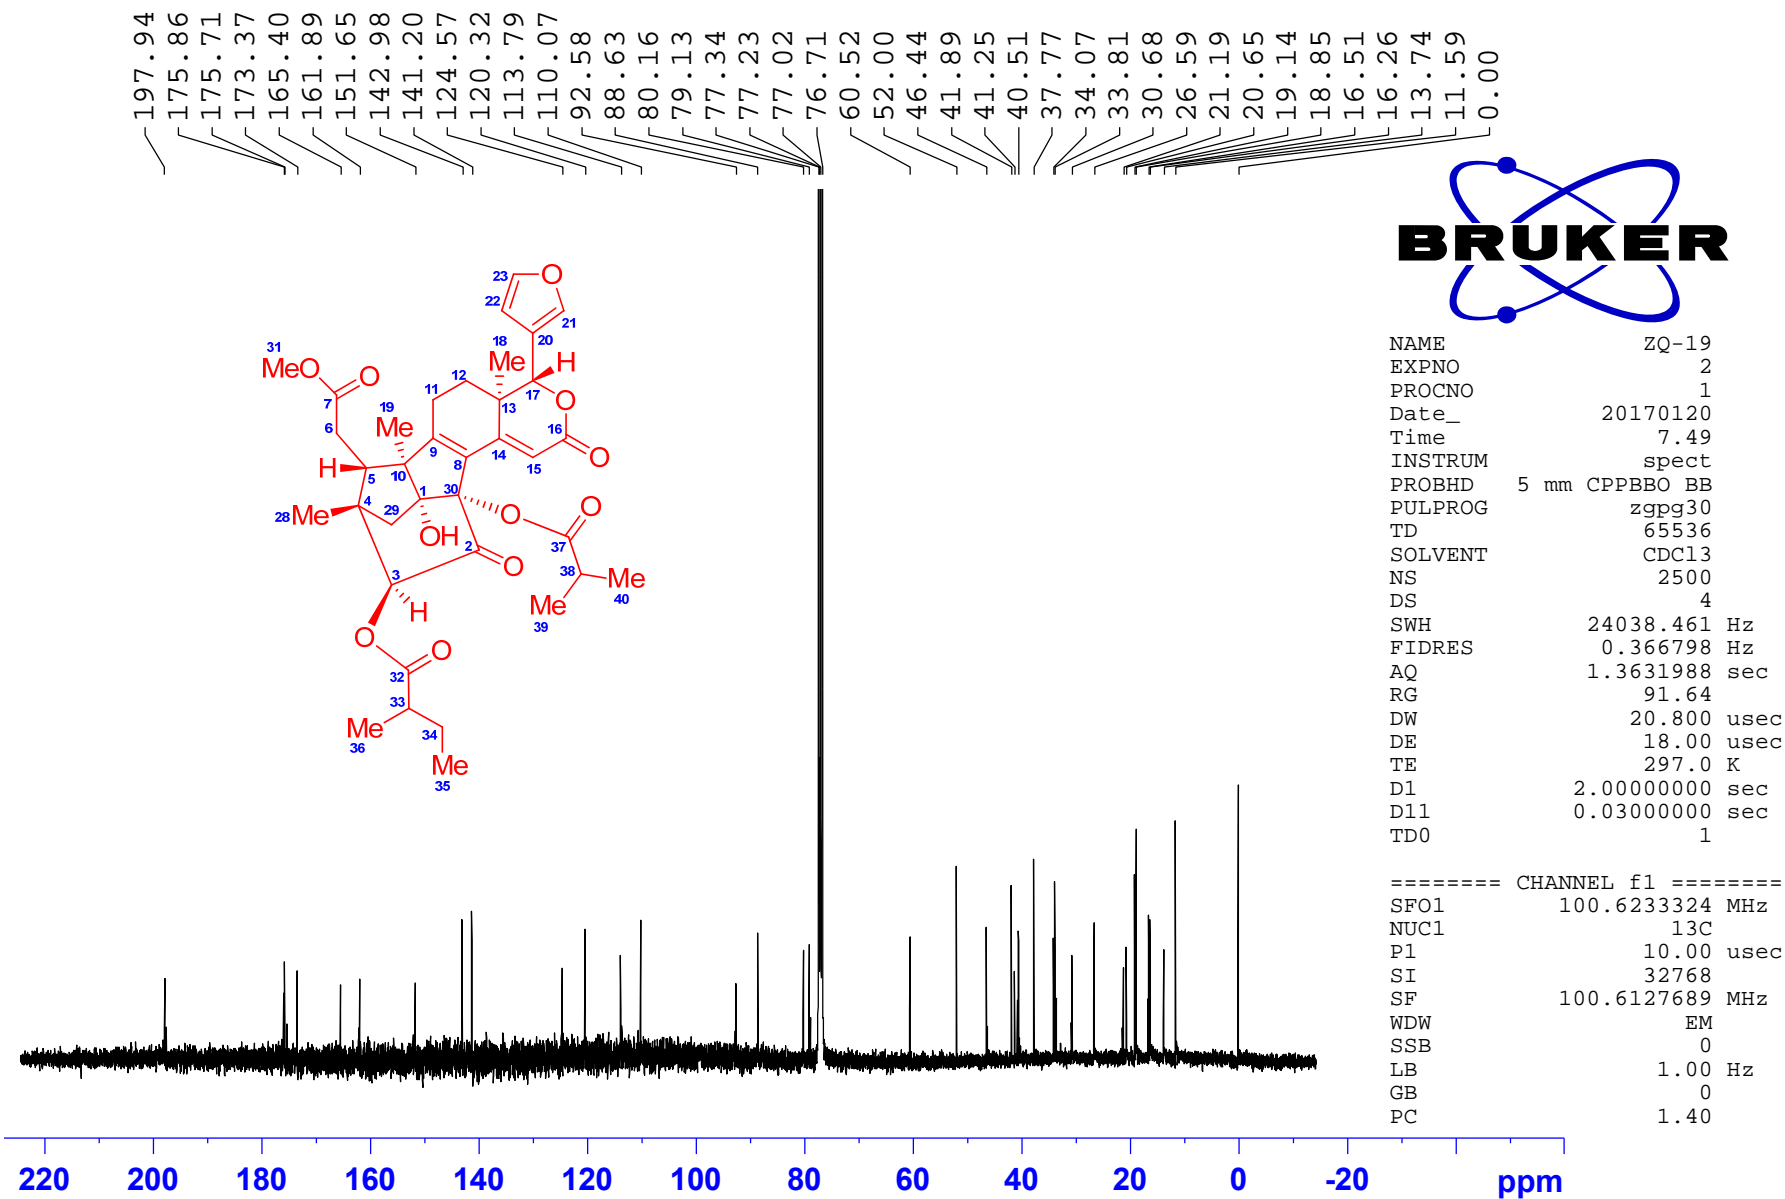

$^{13}\text{C}$  NMR (100 MHz) spectrum of Krishnolide B (**2**) in  $\text{CDCl}_3$

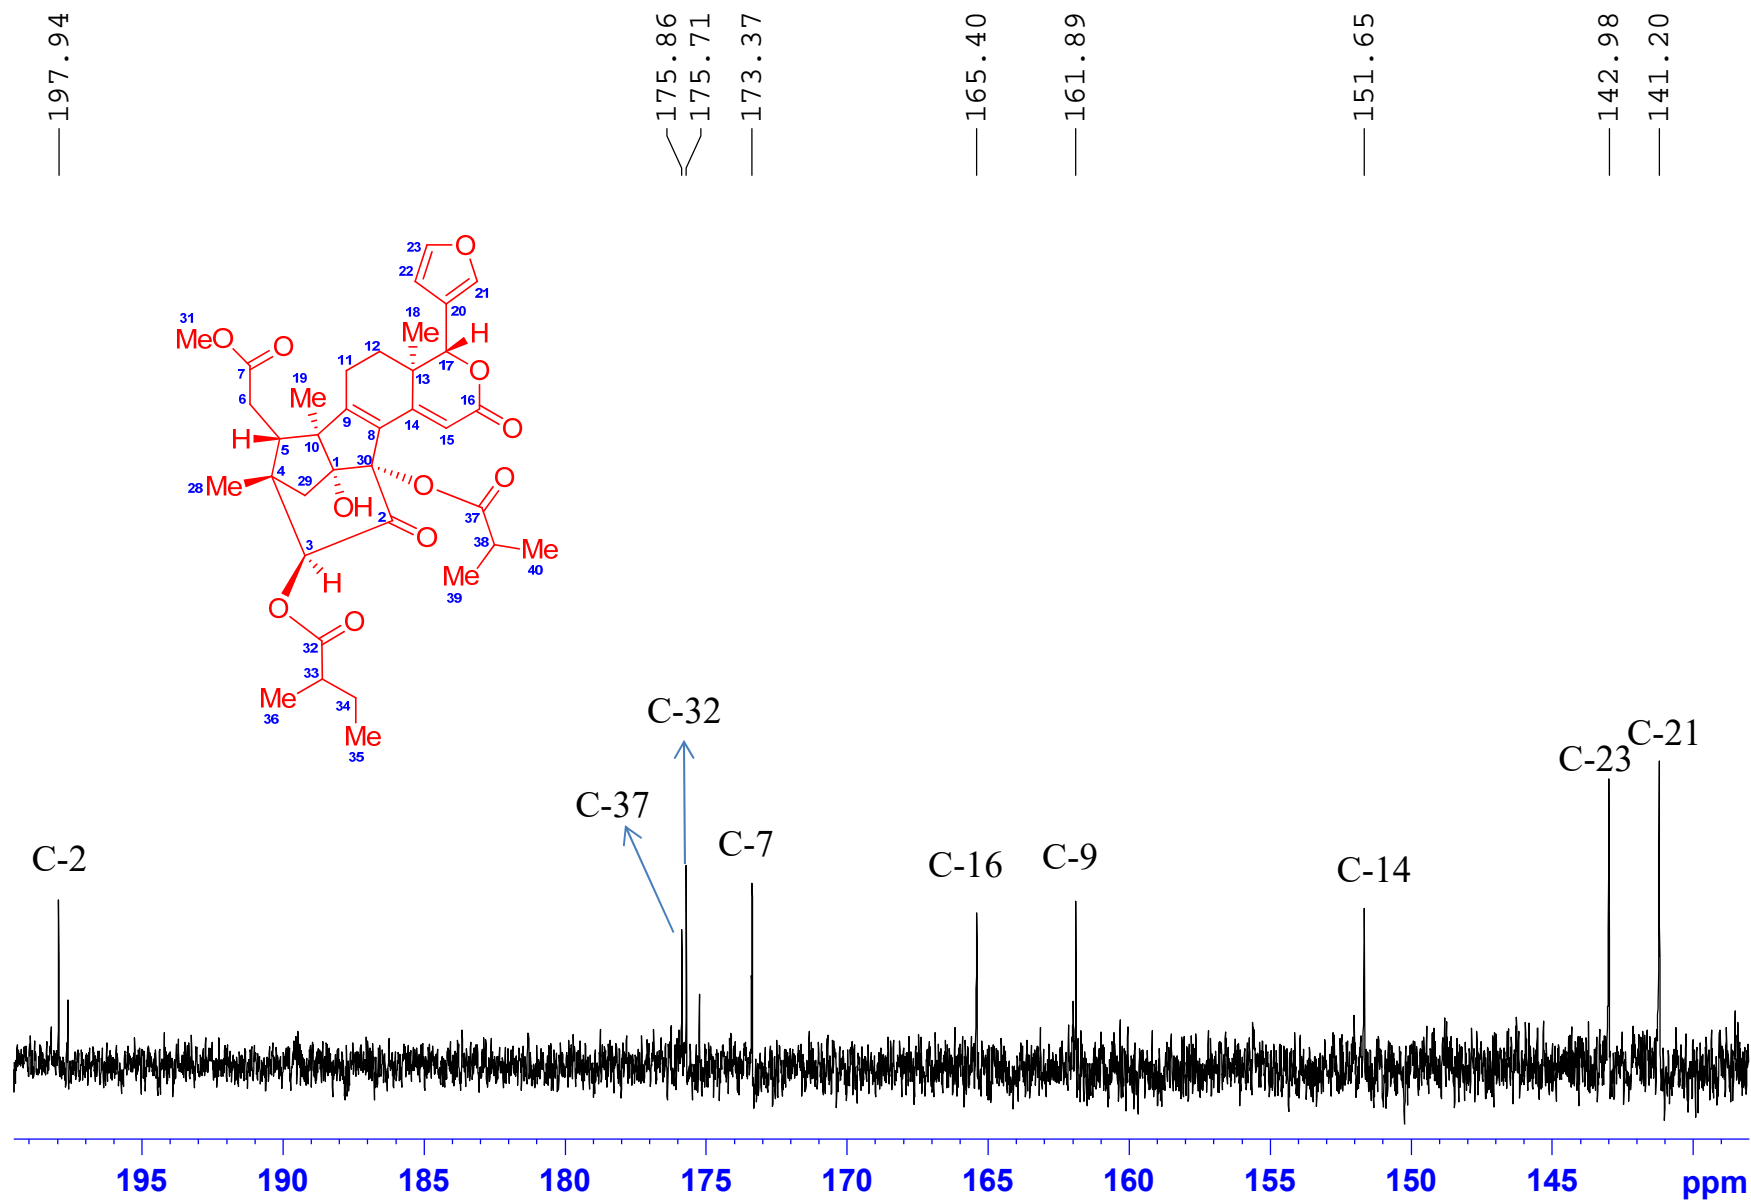

$^{13}\text{C}$  NMR (100 MHz) spectrum of Krishnolide B (**2**) in  $\text{CDCl}_3$

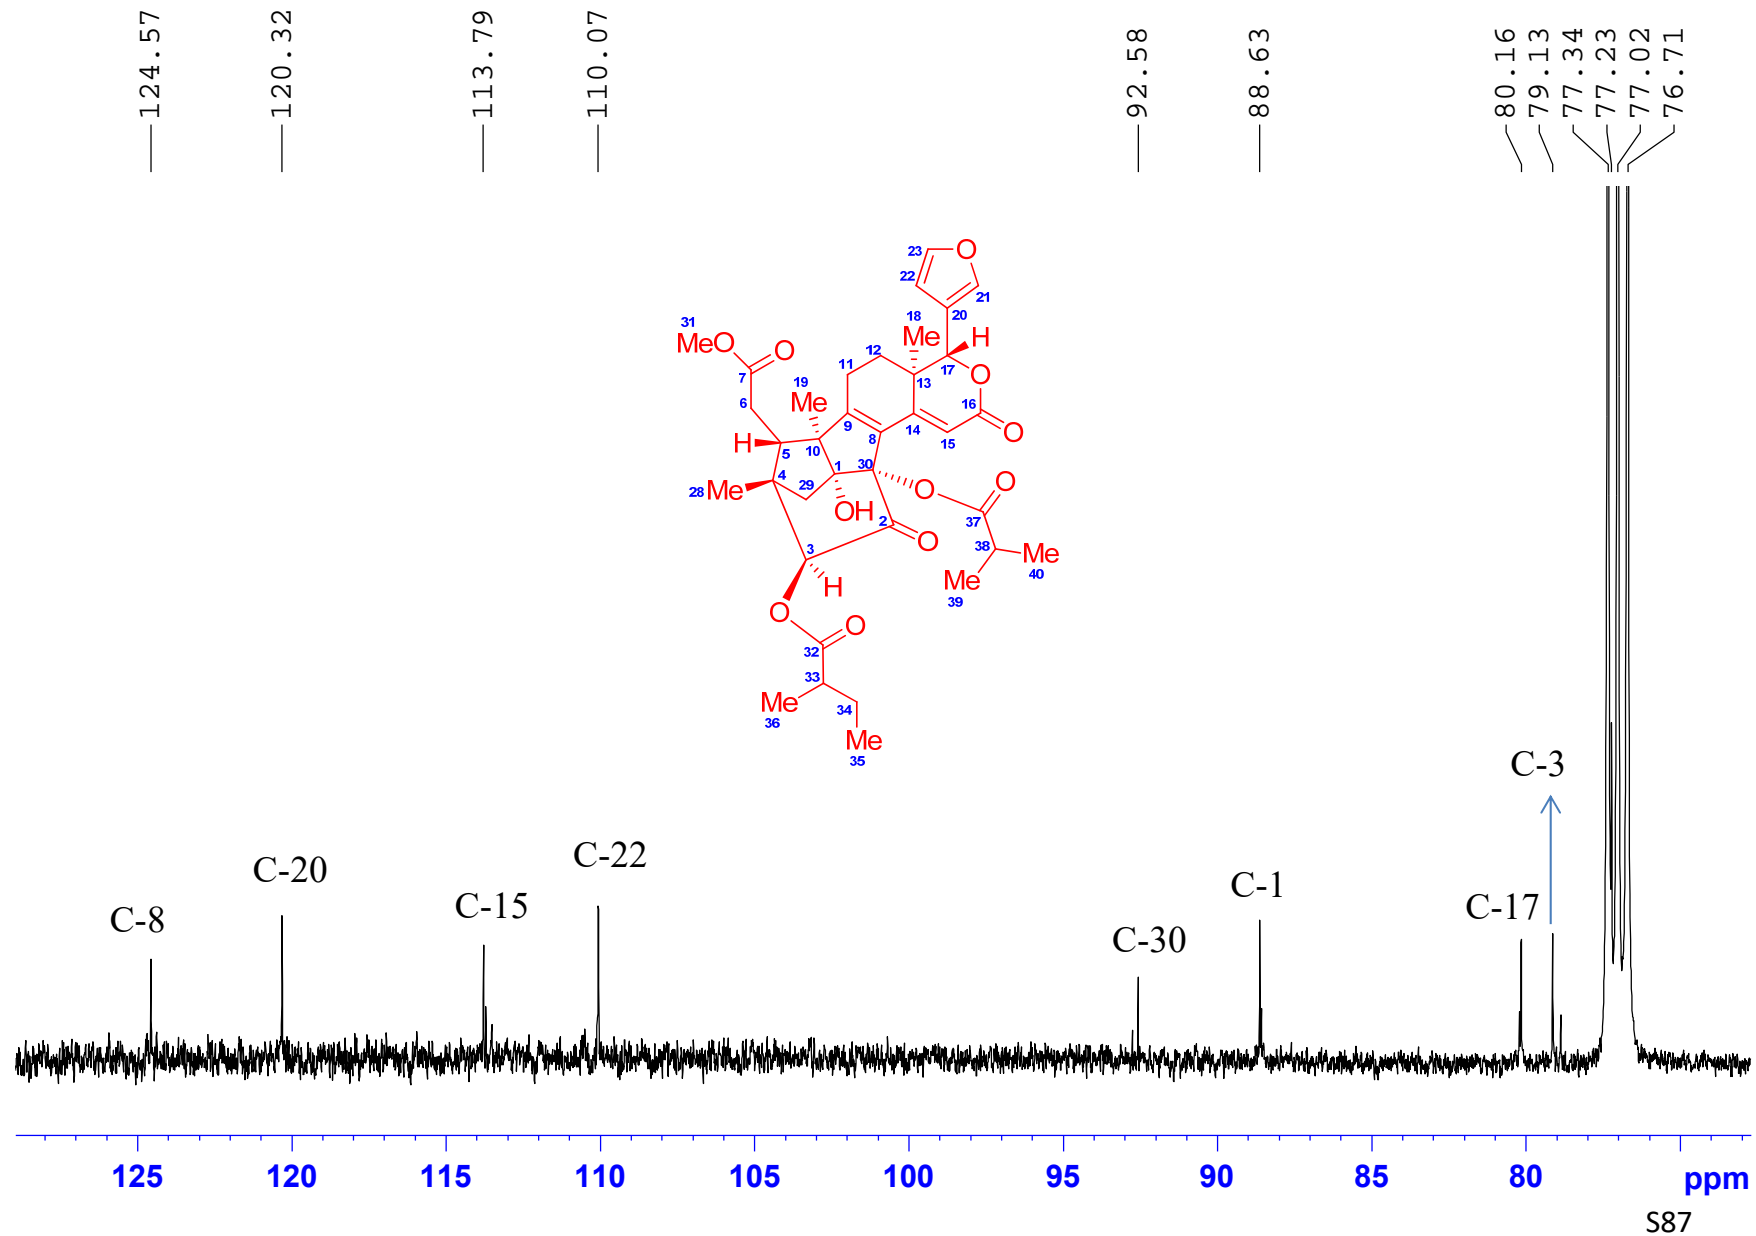

$^{13}\text{C}$  NMR (100 MHz) spectrum of Krishnolide B (**2**) in  $\text{CDCl}_3$

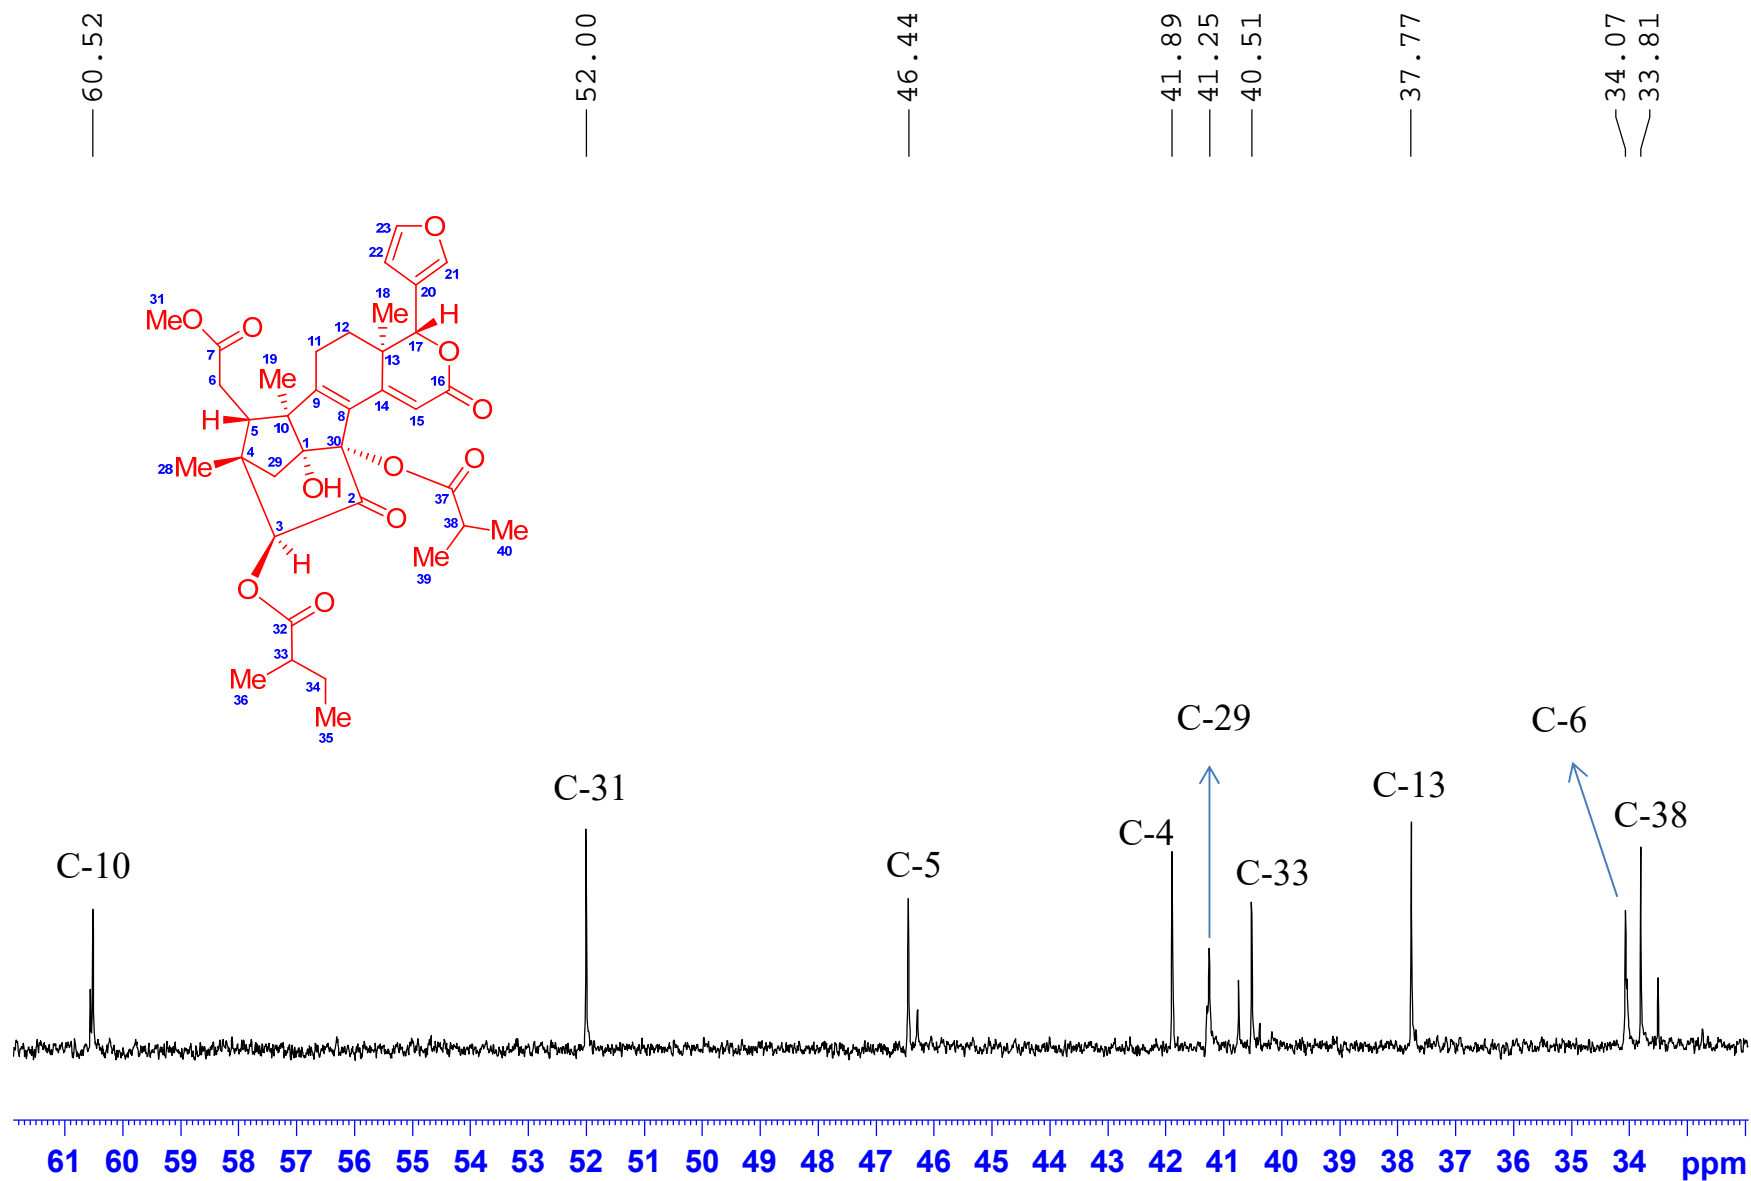



$^{13}\text{C}$  NMR (100 MHz) spectrum of Krishnolide B (**2**) in  $\text{CDCl}_3$

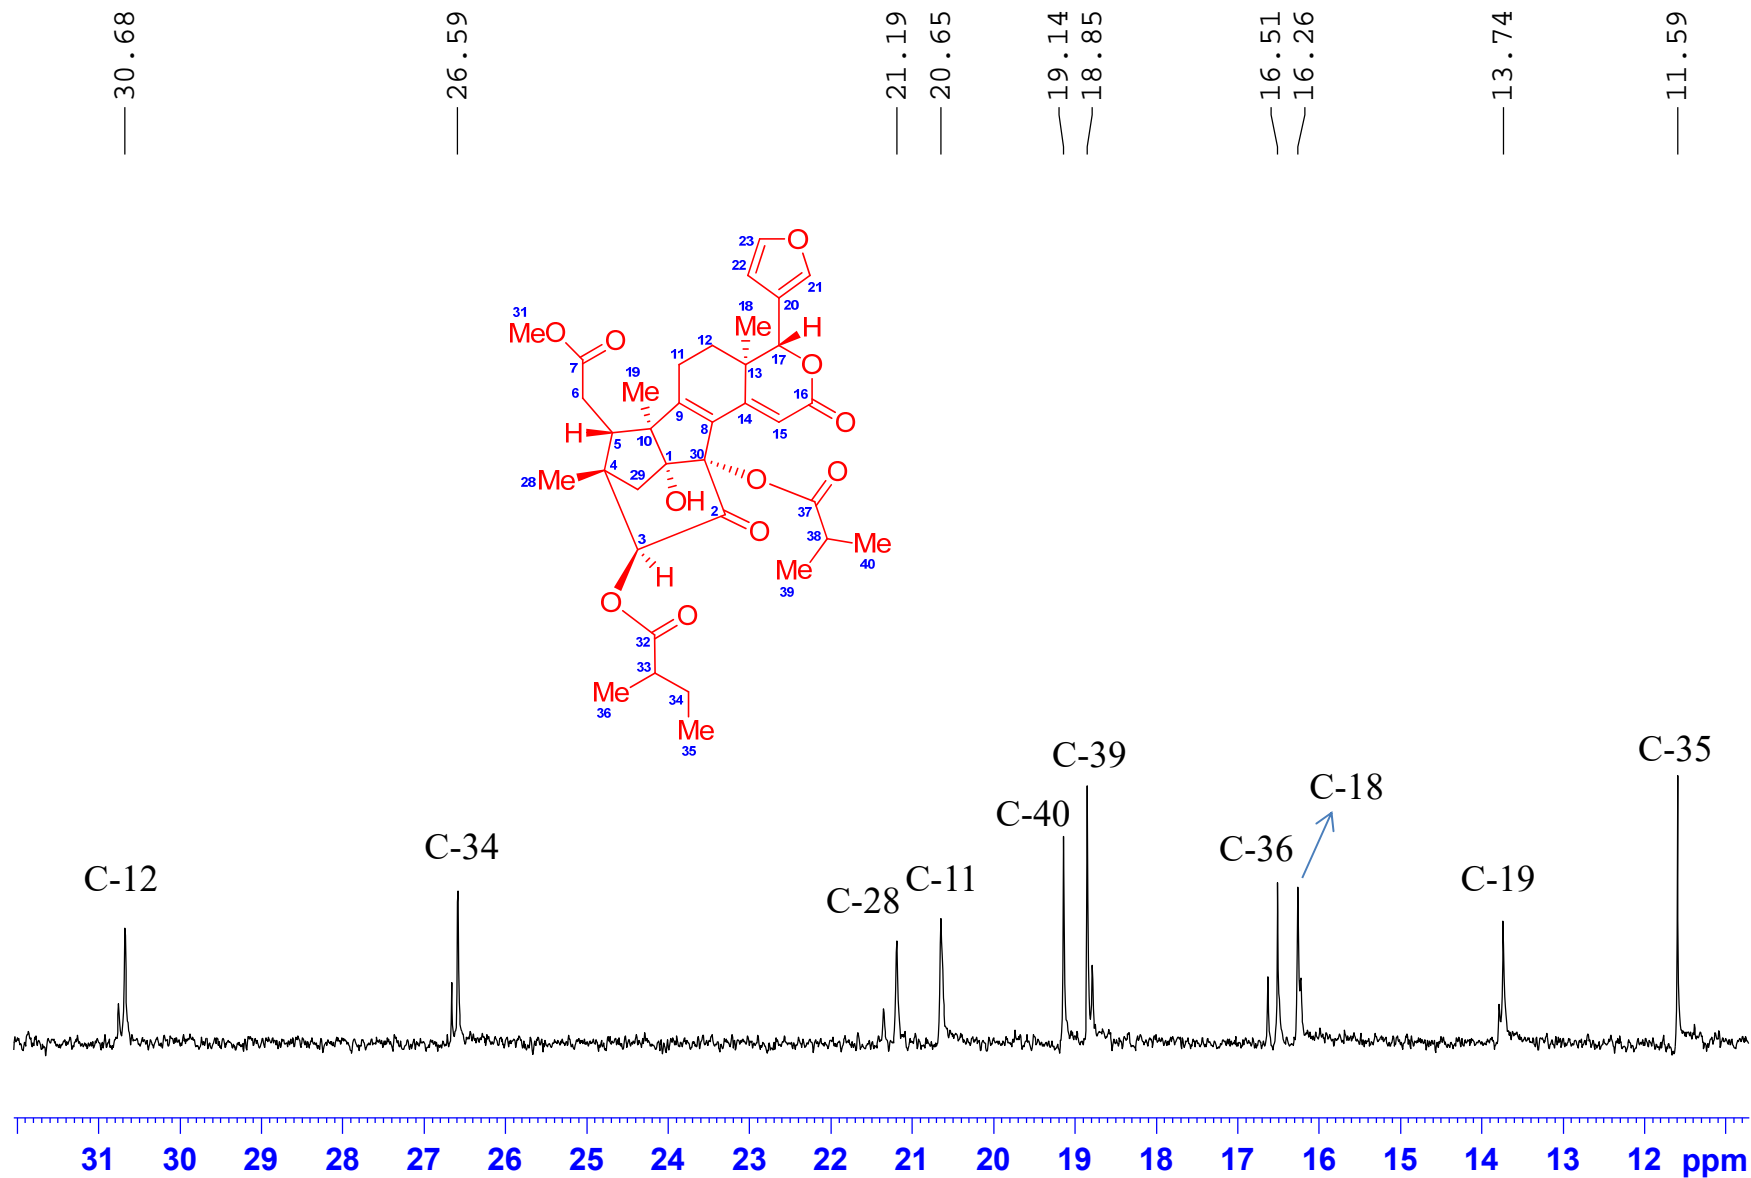

# DEPT 135 spectrum of Krishnolide B (2) in CDCl<sub>3</sub>

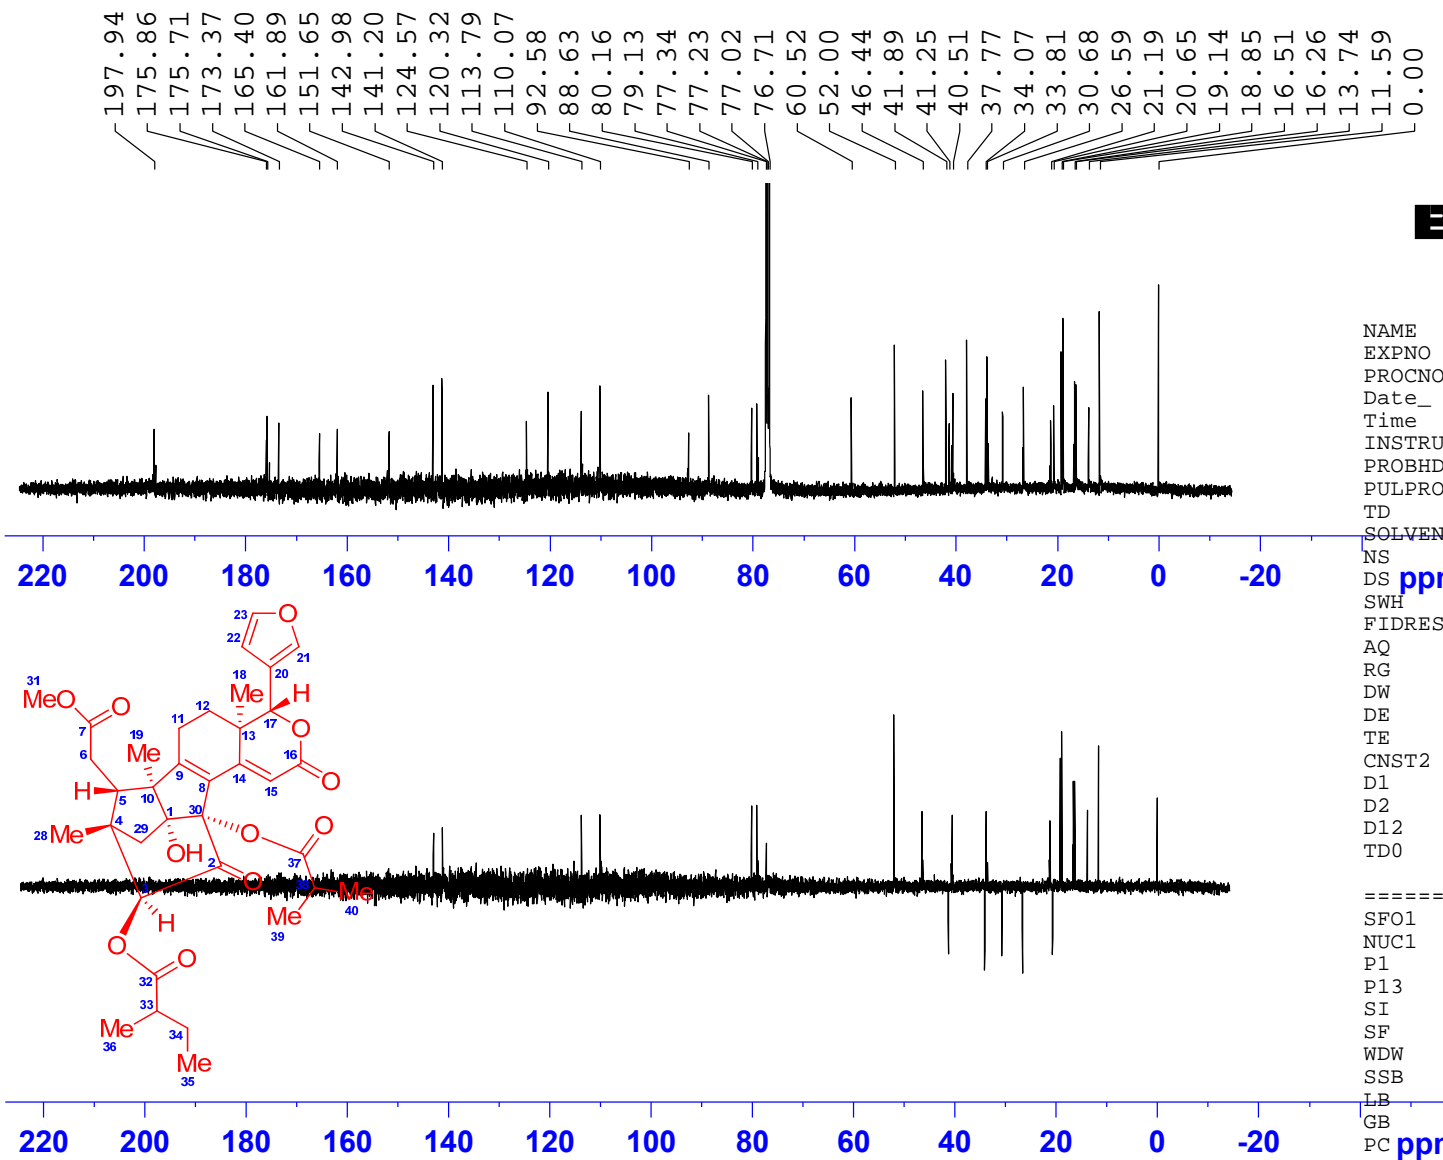

197.94  
175.86  
175.71  
173.37  
165.40  
161.89  
151.65  
142.98  
141.20  
124.57  
120.32  
113.79  
110.07  
92.58  
88.63  
80.16  
79.13  
77.34  
77.23  
77.02  
76.71  
60.52  
52.00  
46.44  
41.89  
41.25  
40.51  
37.77  
34.07  
33.81  
30.68  
26.59  
21.19  
20.65  
19.14  
18.85  
16.51  
16.26  
13.74  
11.59  
0.00

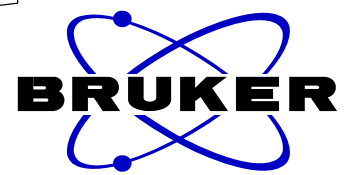

```

NAME          ZQ-19
EXPNO         3
PROCNO       1
Date_        20170120
Time         8.24
INSTRUM      spect
PROBHD       5 mm CPPBBO BB
PULPROG      deptsp135
TD           65536
SOLVENT      CDCl3
NS           600
DS           4
SWH          24038.461 Hz
FIDRES       0.366798 Hz
AQ           1.3631988 sec
RG           91.64
DW           20.800 usec
DE           18.00 usec
TE           297.0 K
CNST2        145.0000000
D1           2.00000000 sec
D2           0.00344828 sec
D12          0.00002000 sec
TD0          1

===== CHANNEL f1 =====
SFO1         100.6233324 MHz
NUC1         13C
P1           10.00 usec
P13          2000.00 usec
SI           32768
SF           100.6127689 MHz
WDW          EM
SSB          0
LB           1.00 Hz
GB           0
PC           1.40
    
```

# DEPT 135 spectrum of Krishnolide B (2) in CDCl<sub>3</sub>

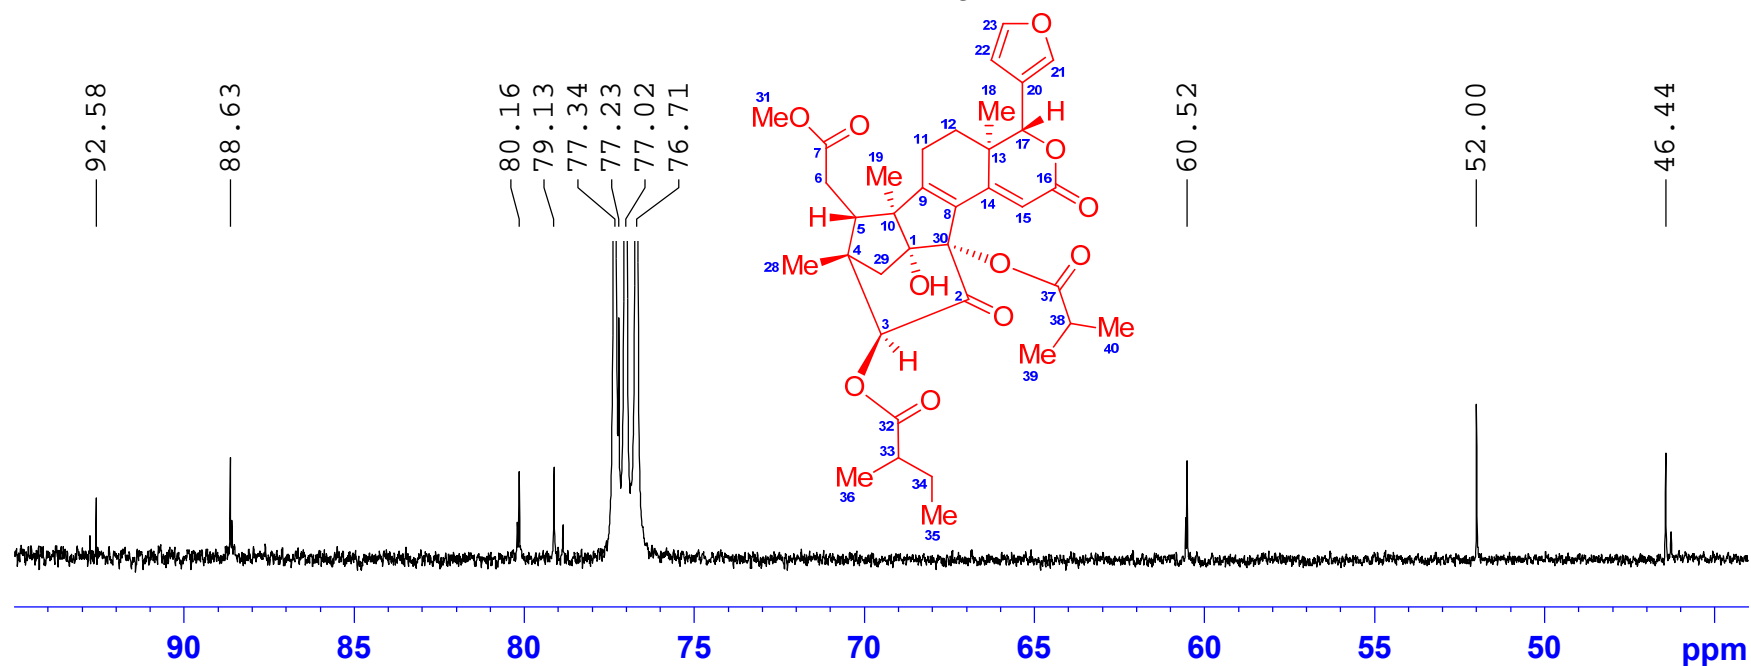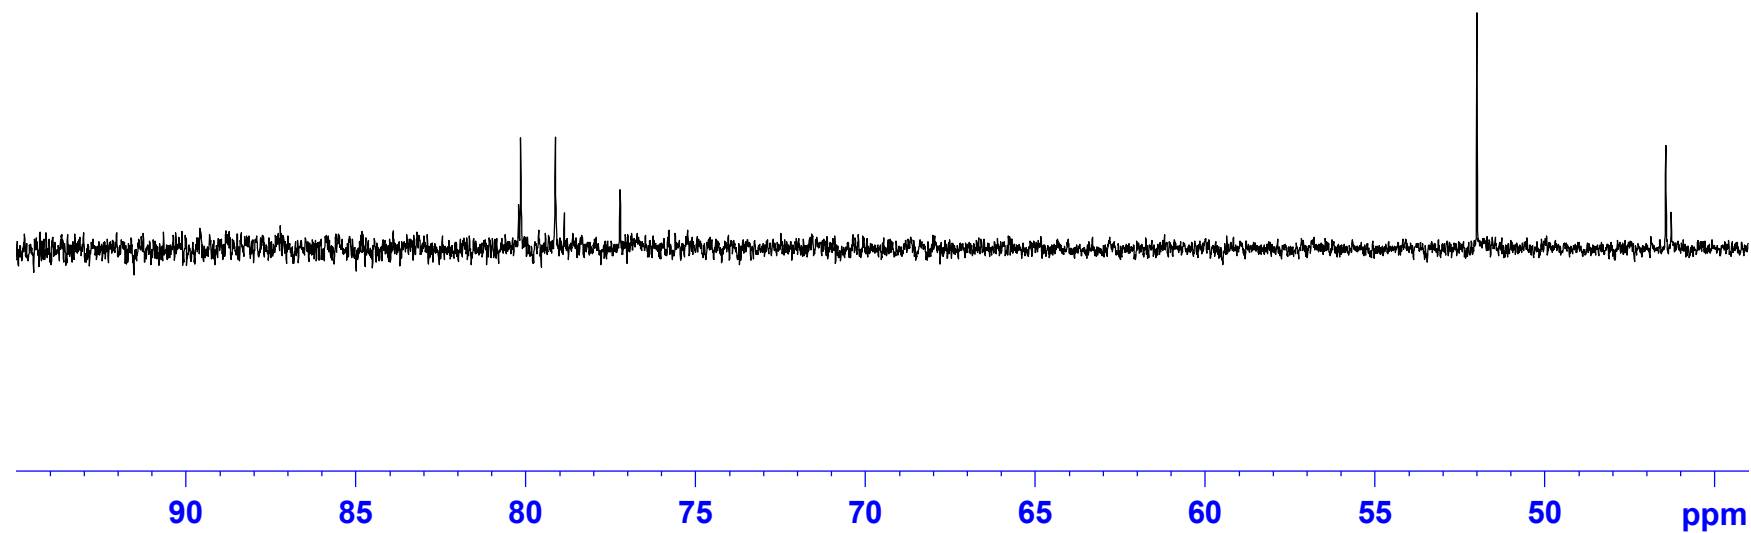

# DEPT 135 spectrum of Krishnolide B (2) in CDCl<sub>3</sub>

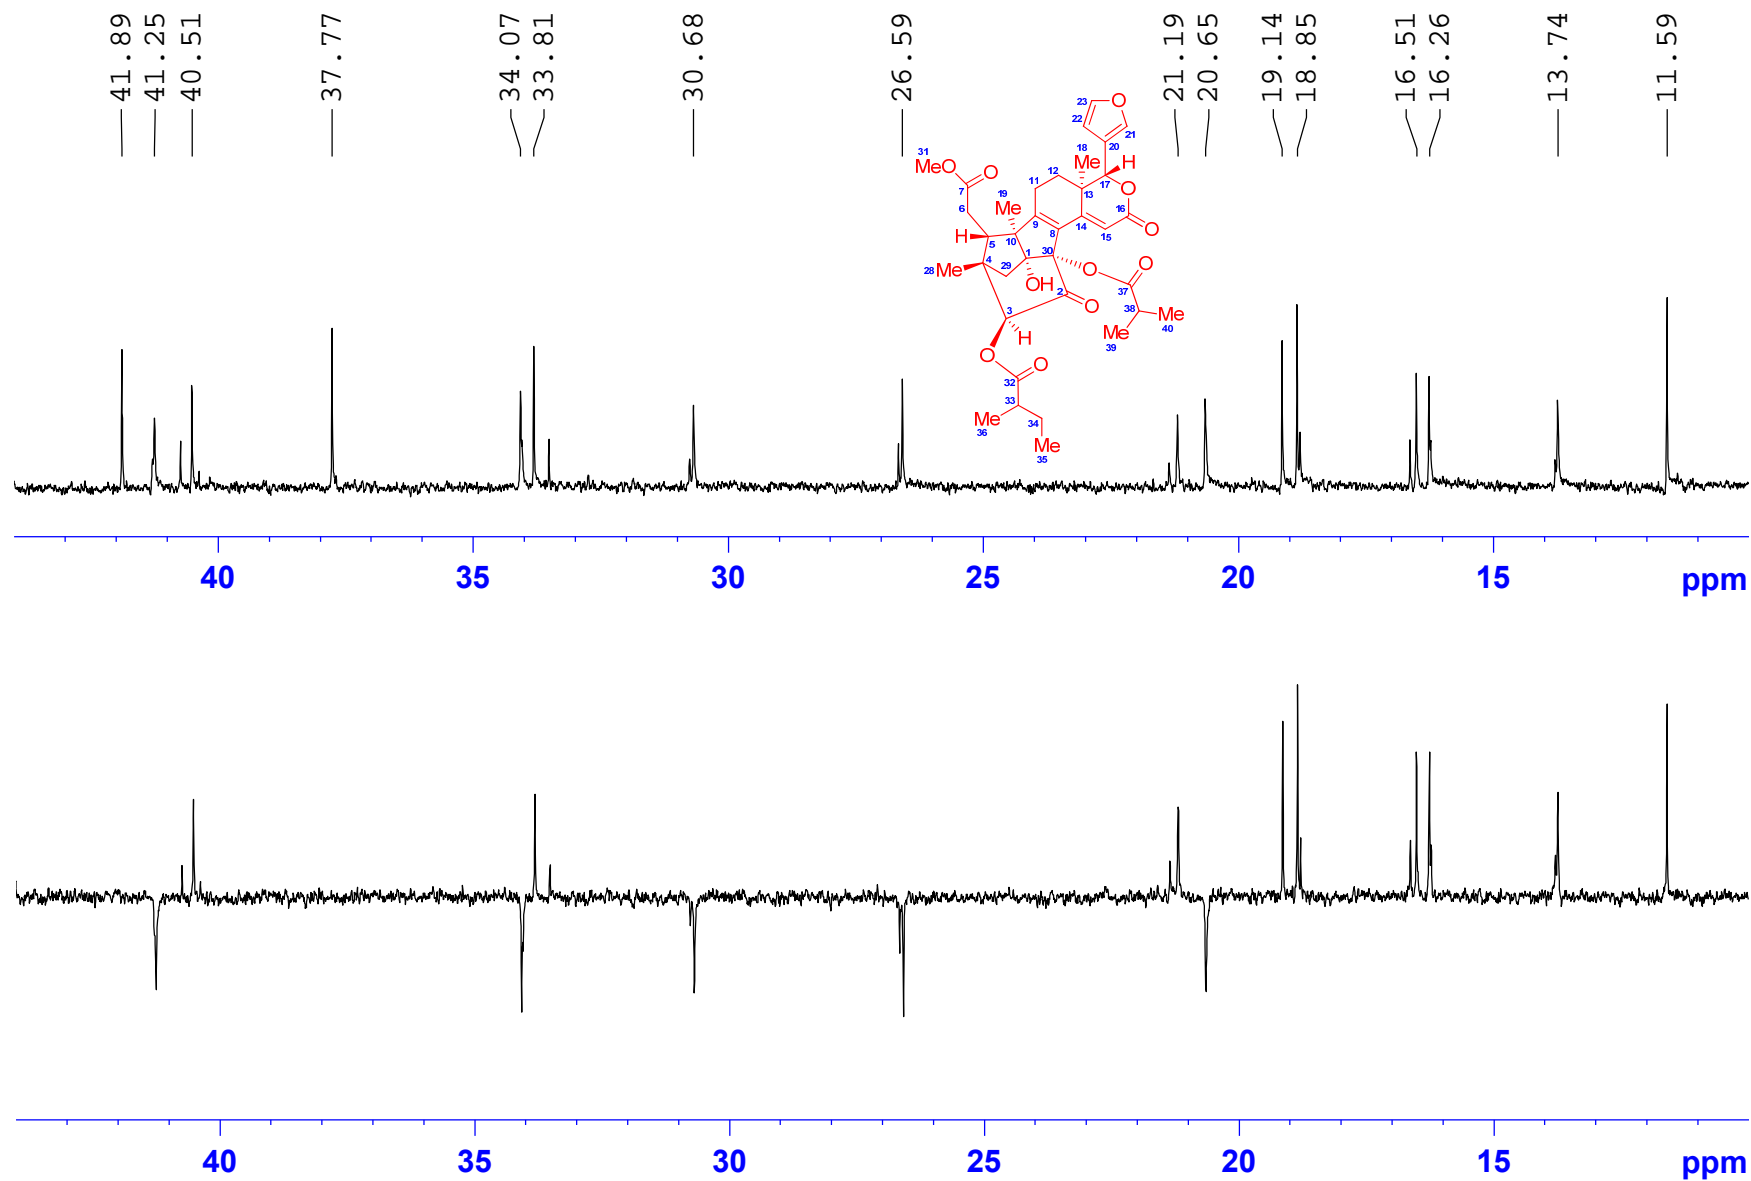

# $^1\text{H}$ - $^1\text{H}$ COSY spectrum of Krishnolide B (2) in $\text{CDCl}_3$

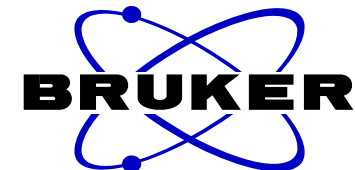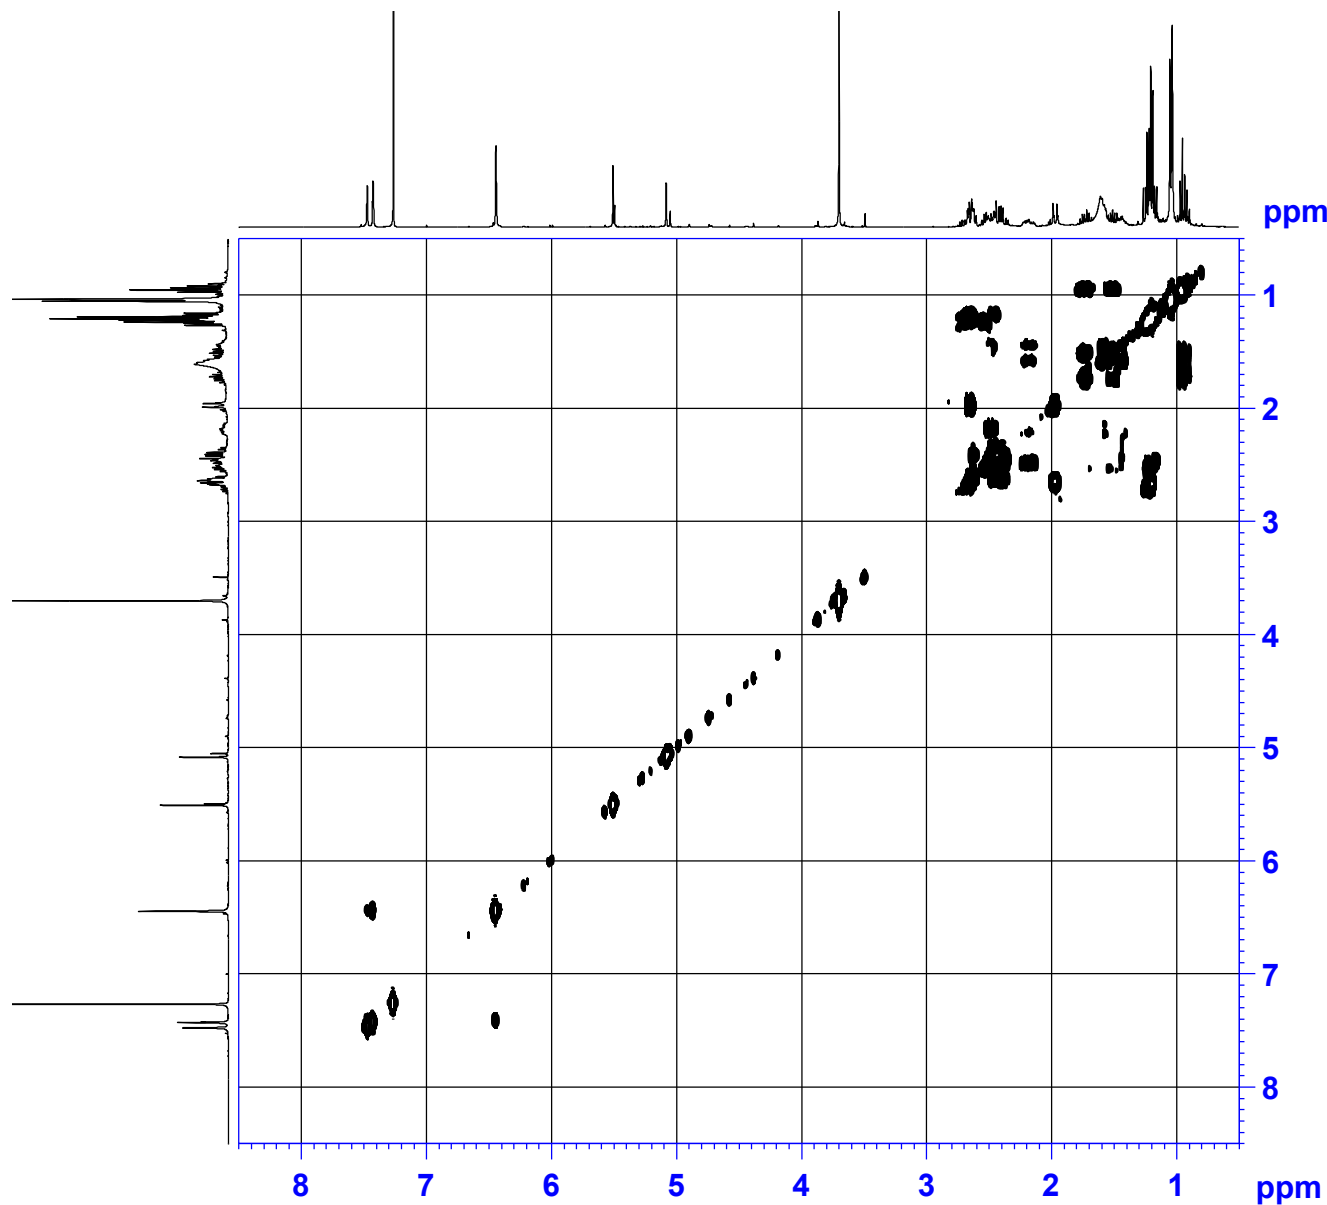

```

NAME           ZQ-19
EXPNO          4
PROCNO         1
Date_          20170121
Time           15.30
INSTRUM        spect
PROBHD         5 mm CPPBBO BB
PULPROG        cosygpppqf
TD             2048
SOLVENT        CDCl3
NS             8
DS             8
SWH            3906.250 Hz
FIDRES         1.907349 Hz
AQ             0.2621940 sec
RG             208.5
DW             128.000 usec
DE             10.00 usec
TE             297.0 K
D0             0.00000300 sec
D1             1.89678097 sec
D11            0.03000000 sec
D12            0.00002000 sec
D13            0.00000400 sec
D16            0.00020000 sec
IN0            0.00025600 sec
    
```

```

===== CHANNEL f1 =====
SFO1          400.1318006 MHz
NUC1          1H
P0            11.50 usec
P1            11.50 usec
P17           2500.00 usec
ND0           1
TD            128
SFO1          400.1318 MHz
FIDRES        30.517578 Hz
SW            9.762 ppm
FnMODE        QF
SI            1024
SF            400.1300061 MHz
WDW           QSINE
SSB           0
LB            0.00 Hz
GB            0
PC            1.40
SI            1024
MC2           QF
SF            400.1300061 MHz
WDW           QSINE
SSB           0
LB            0.00 Hz
GB            0
    
```

S93

$^1\text{H}$ - $^1\text{H}$  COSY spectrum of Krishnolide B (**2**) in  $\text{CDCl}_3$

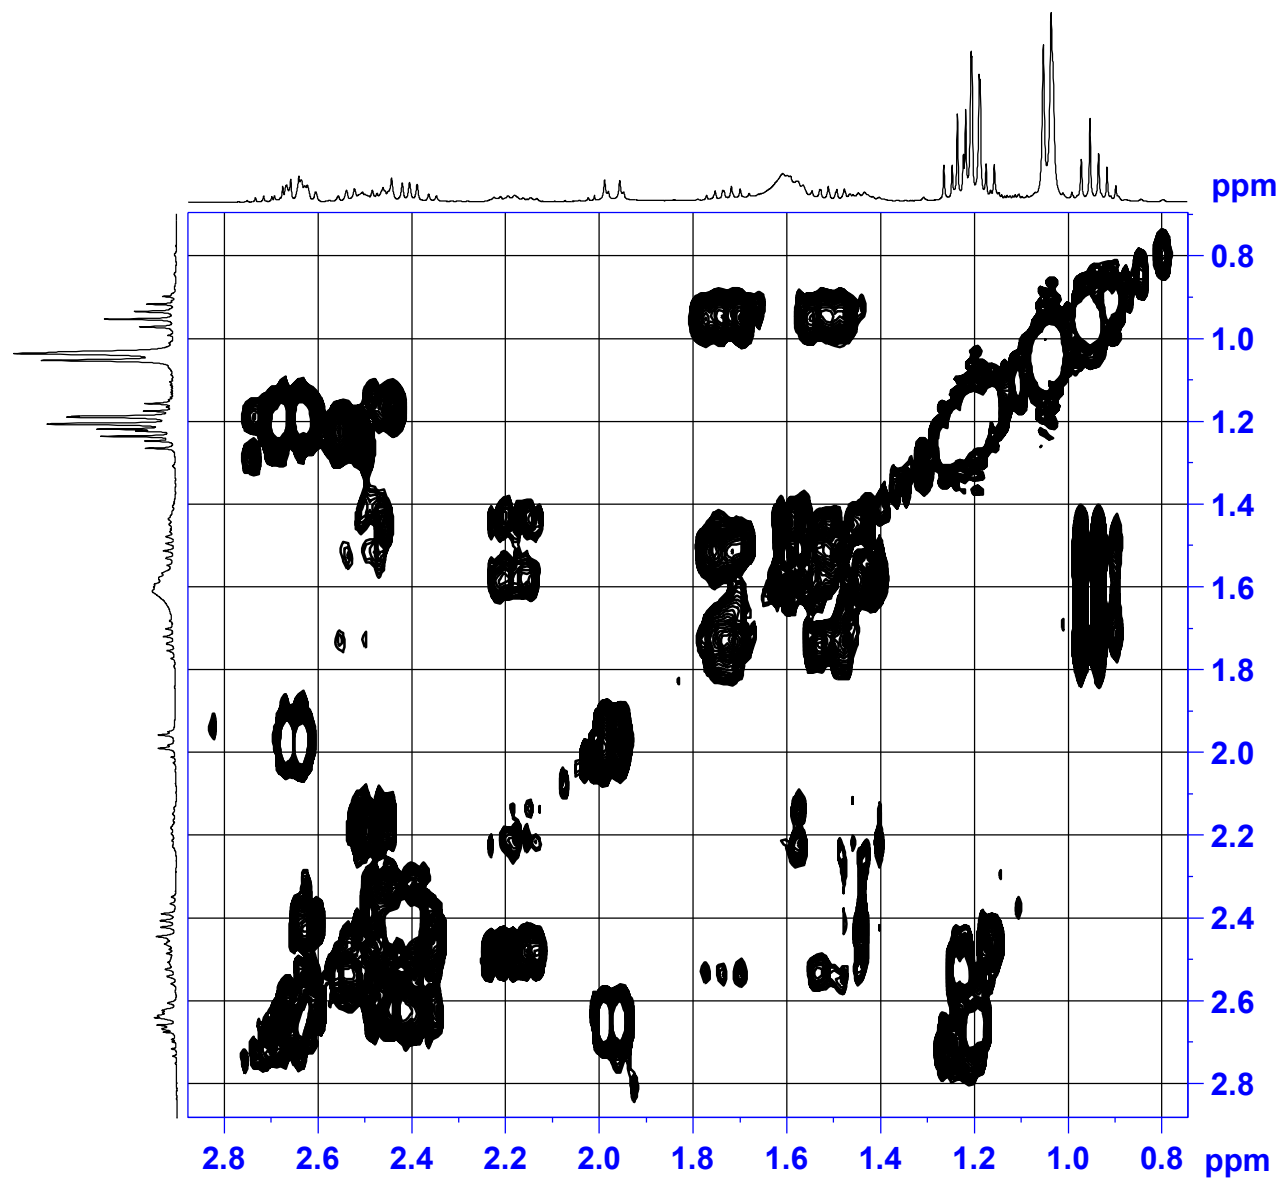

$^1\text{H}$ - $^1\text{H}$  COSY spectrum of Krishnolide B (**2**) in  $\text{CDCl}_3$

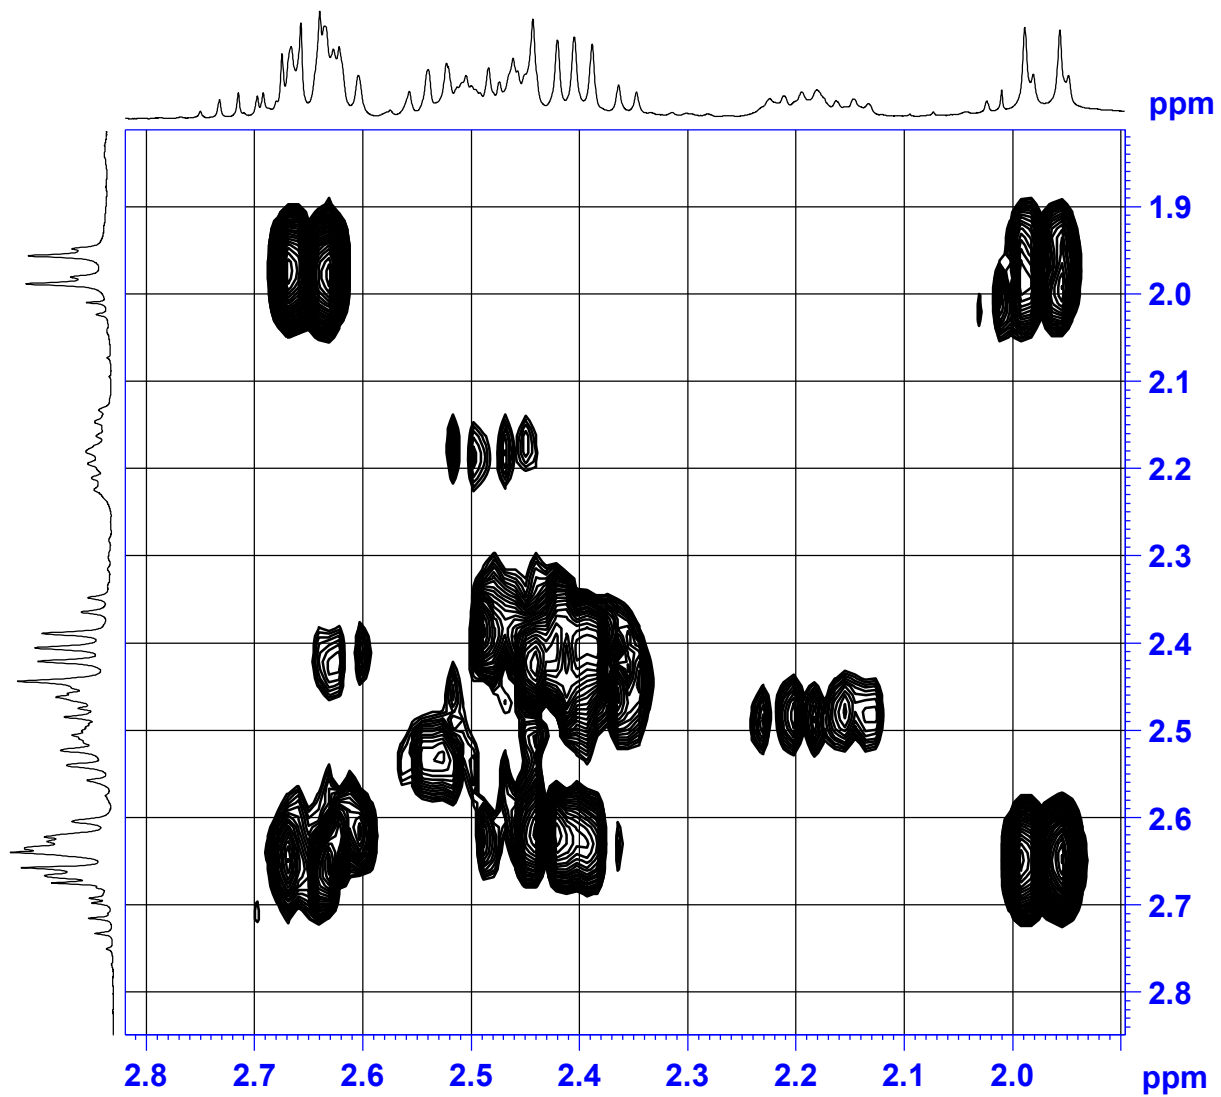

$^1\text{H}$ - $^1\text{H}$  COSY spectrum of Krishnolide B (**2**) in  $\text{CDCl}_3$

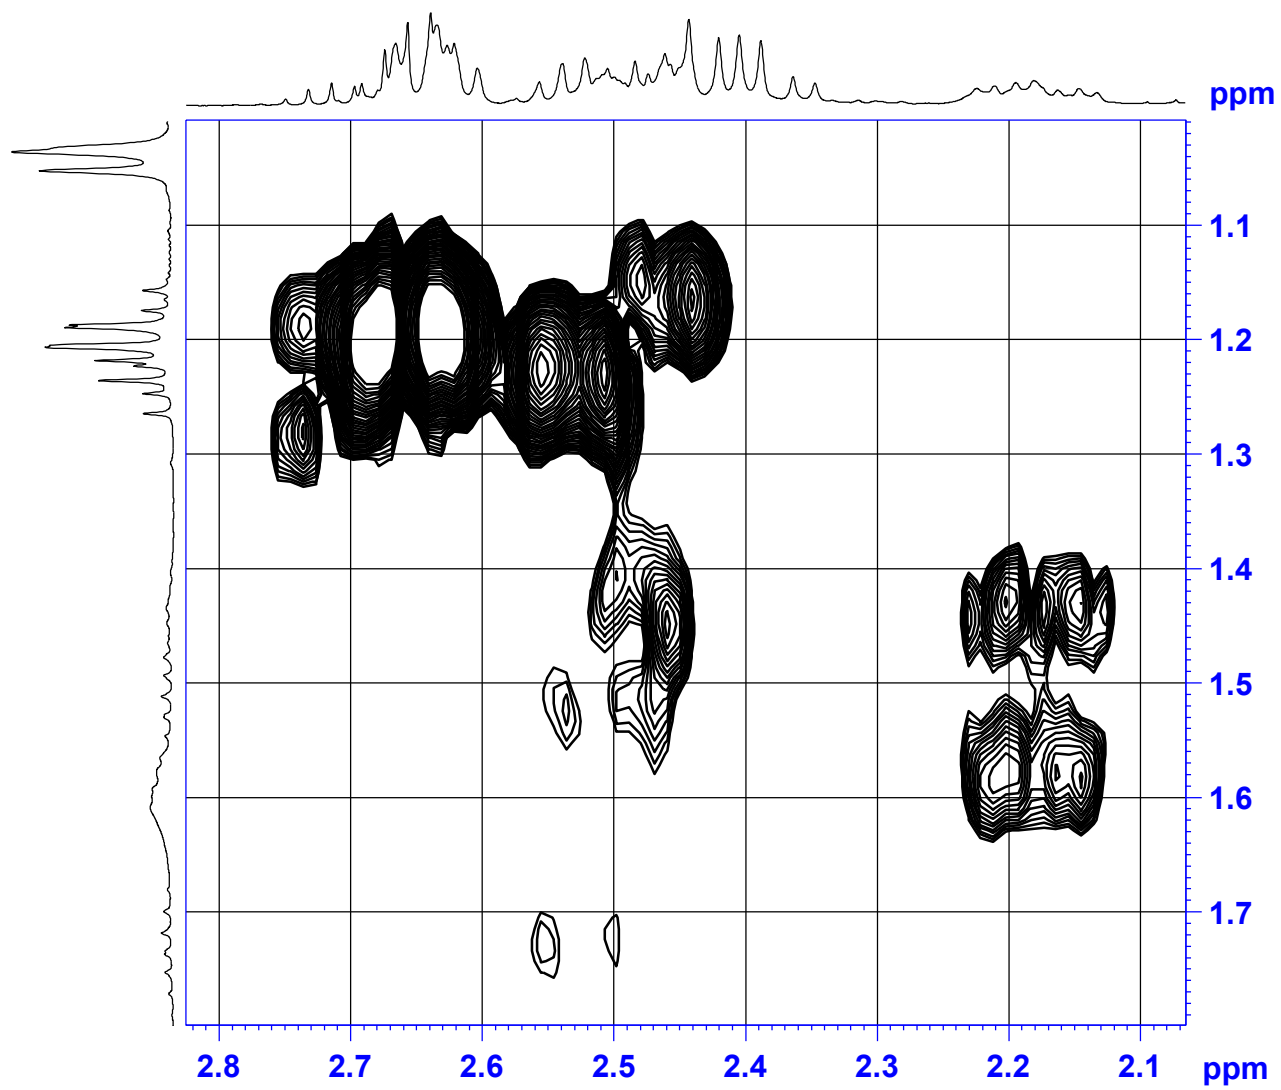



$^1\text{H}$ - $^1\text{H}$  COSY spectrum of Krishnolide B (**2**) in  $\text{CDCl}_3$

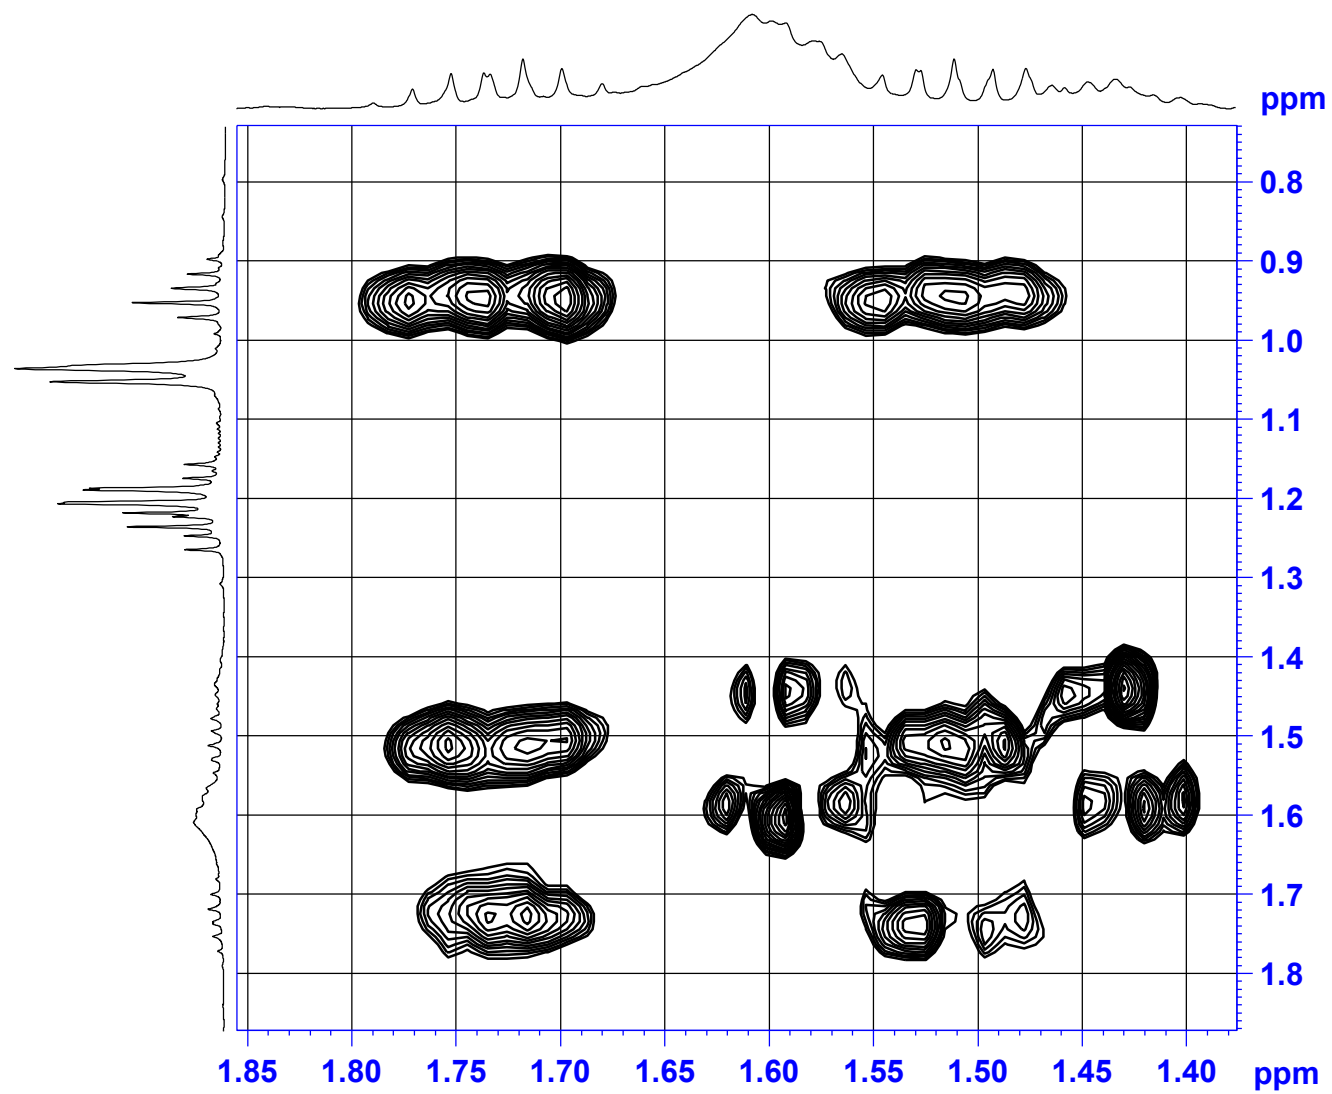

# HSQC spectrum of Krishnolide B (2) in CDCl<sub>3</sub>

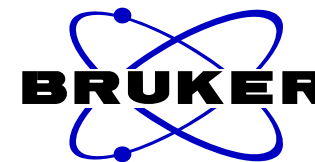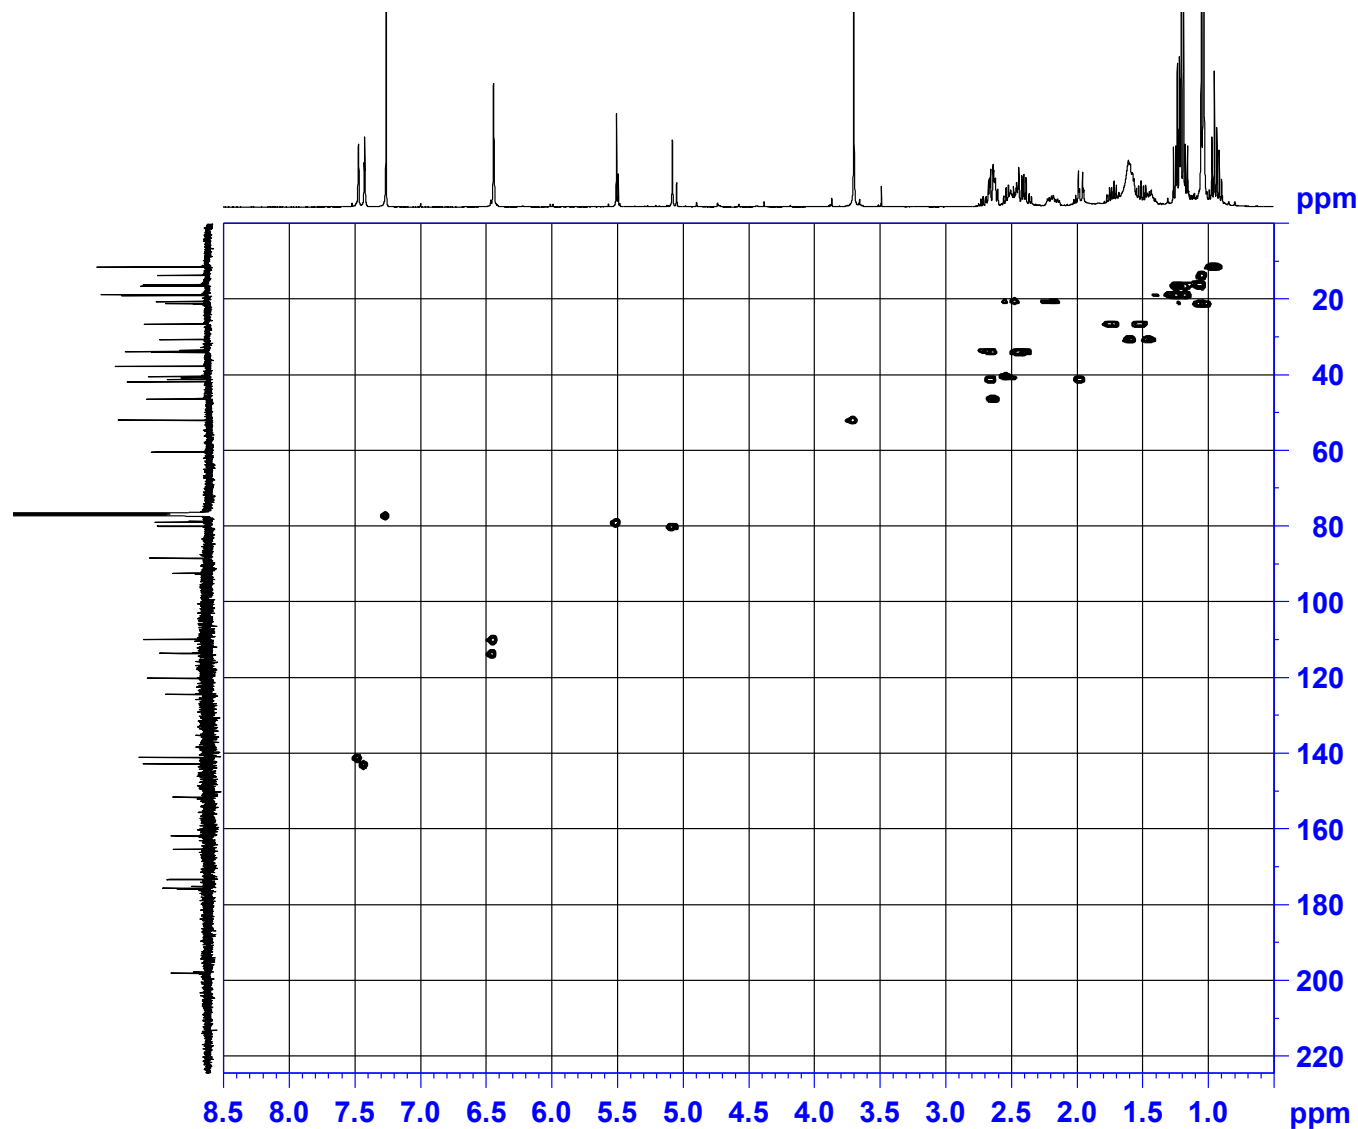

```

NAME           ZQ-19
EXPNO          5
PROCNO         1
Date_          20170121
Time           16.09
INSTRUM        spect
PROBHD         5 mm CPPBBO BB
PULPROG        hsqcetgpsi2
TD             1024
SOLVENT        CDCl3
NS             16
DS             16
SWH            4302.926 Hz
FIDRES         4.202076 Hz
AQ             0.1190388 sec
RG             208.5
DW             116.200 usec
DE             10.00 usec
TE             297.0 K
CNST2          145.0000000
D0             0.00000300 sec
D1             1.46497905 sec
D4             0.00172414 sec
D11            0.03000000 sec
D16            0.00020000 sec
D24            0.00086207 sec
IN0            0.00002080 sec
ZGOPTNS
    
```

```

===== CHANNEL f1 =====
SF01          400.1320007 MHz
NUC1           1H
P1             11.50 usec
P2             23.00 usec
P28            0.00 usec
ND0            2
TD             256
SF01           100.6233 MHz
FIDRES         93.900238 Hz
SW             238.896 ppm
FnMODE         Echo-Antiecho
SI             1024
SF             400.1300061 MHz
WDW            QSINE
SSB            2
LB             0.00 Hz
GB             0
PC             1.40
SI             1024
MC2            echo-antiecho
SF             100.6127562 MHz
WDW            QSINE
SSB            2
LB             0.00 Hz
GB             0
    
```

# HSQC spectrum of Krishnolide B (2) in CDCl<sub>3</sub>

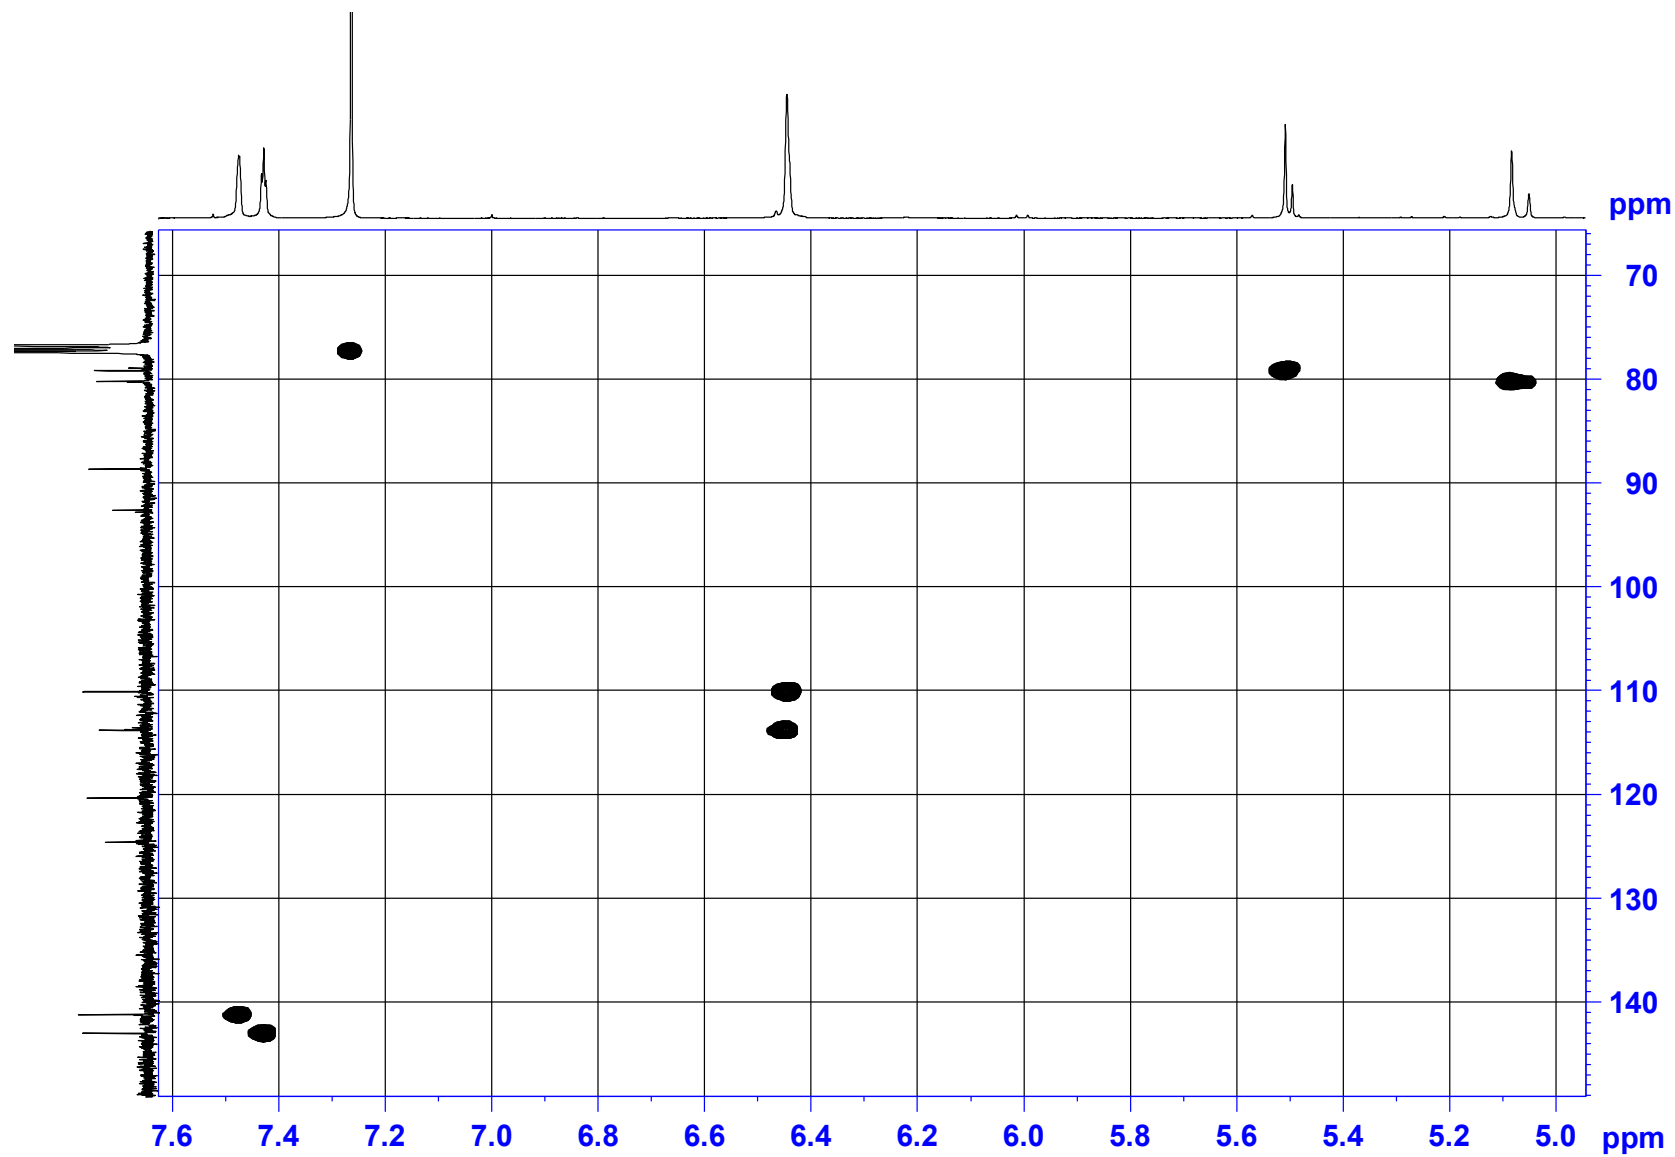

# HSQC spectrum of Krishnolide B (2) in CDCl<sub>3</sub>

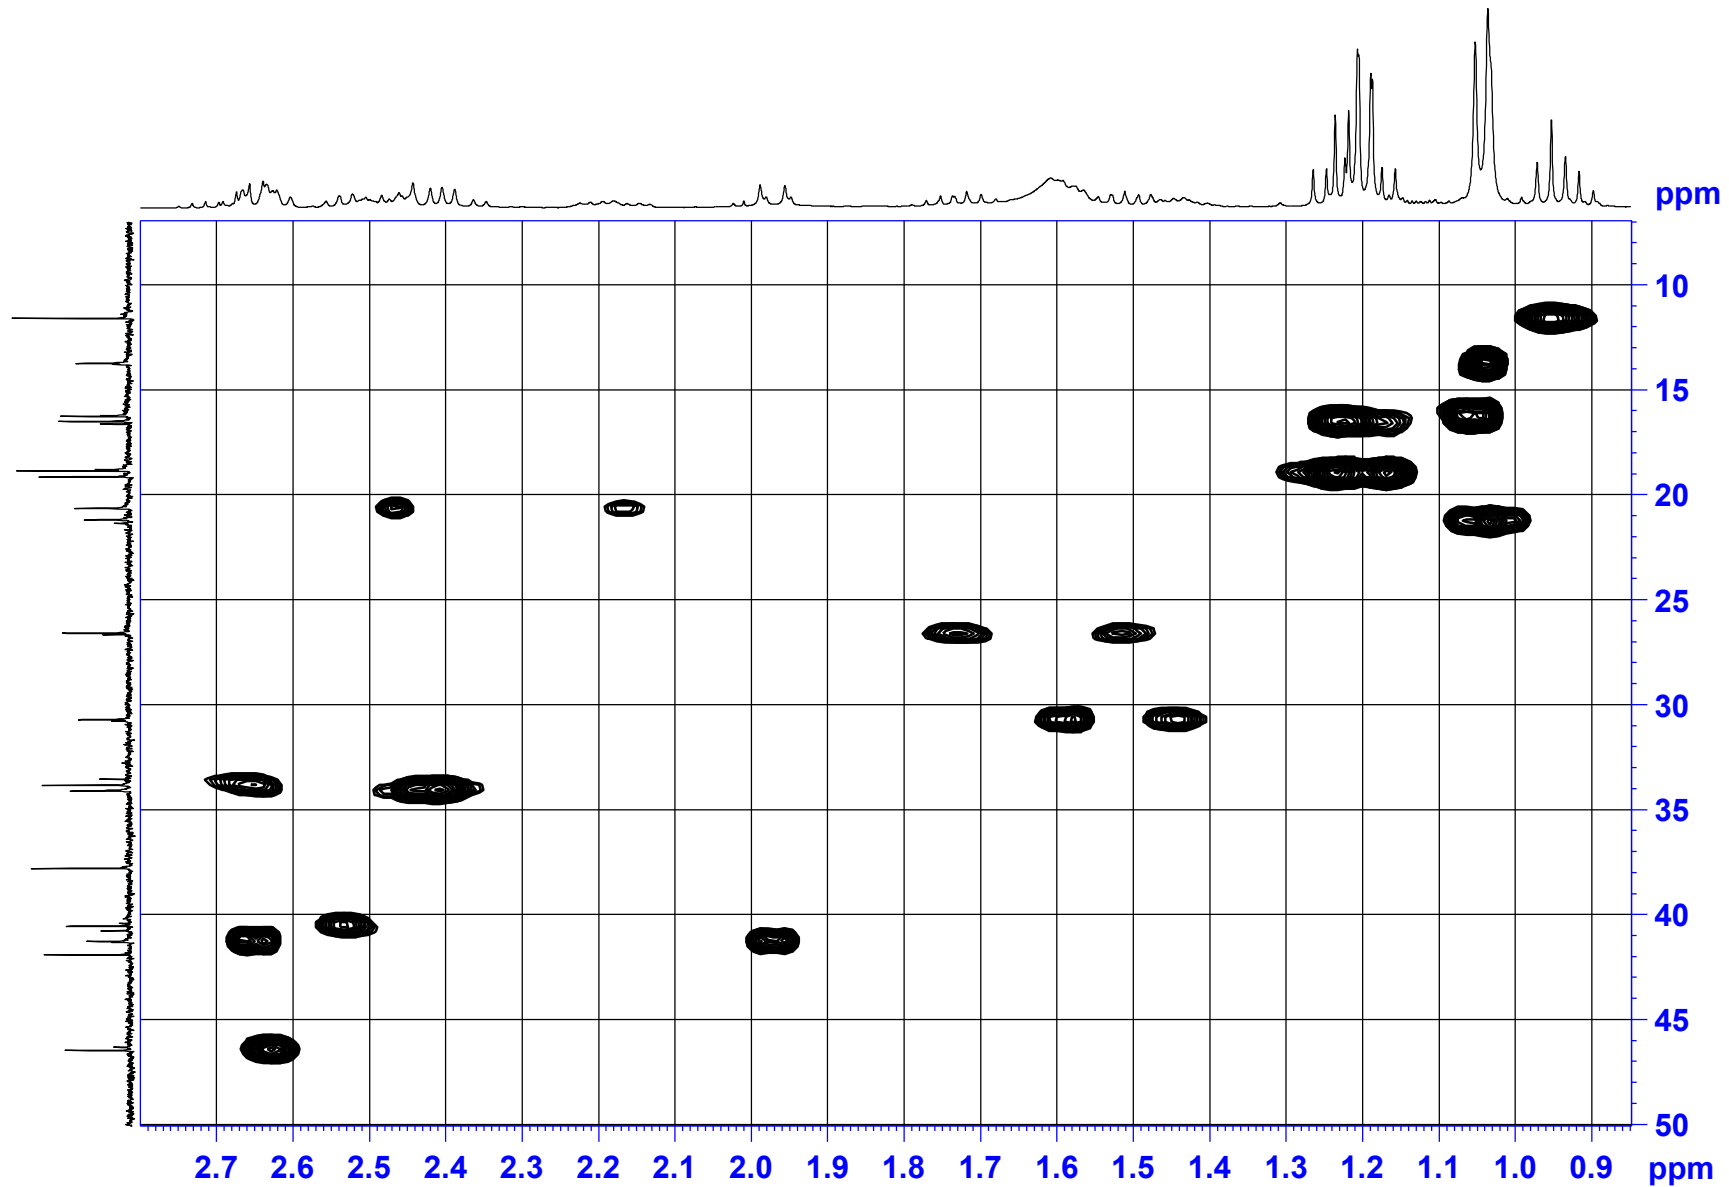

# HSQC spectrum of Krishnolide B (2) in CDCl<sub>3</sub>

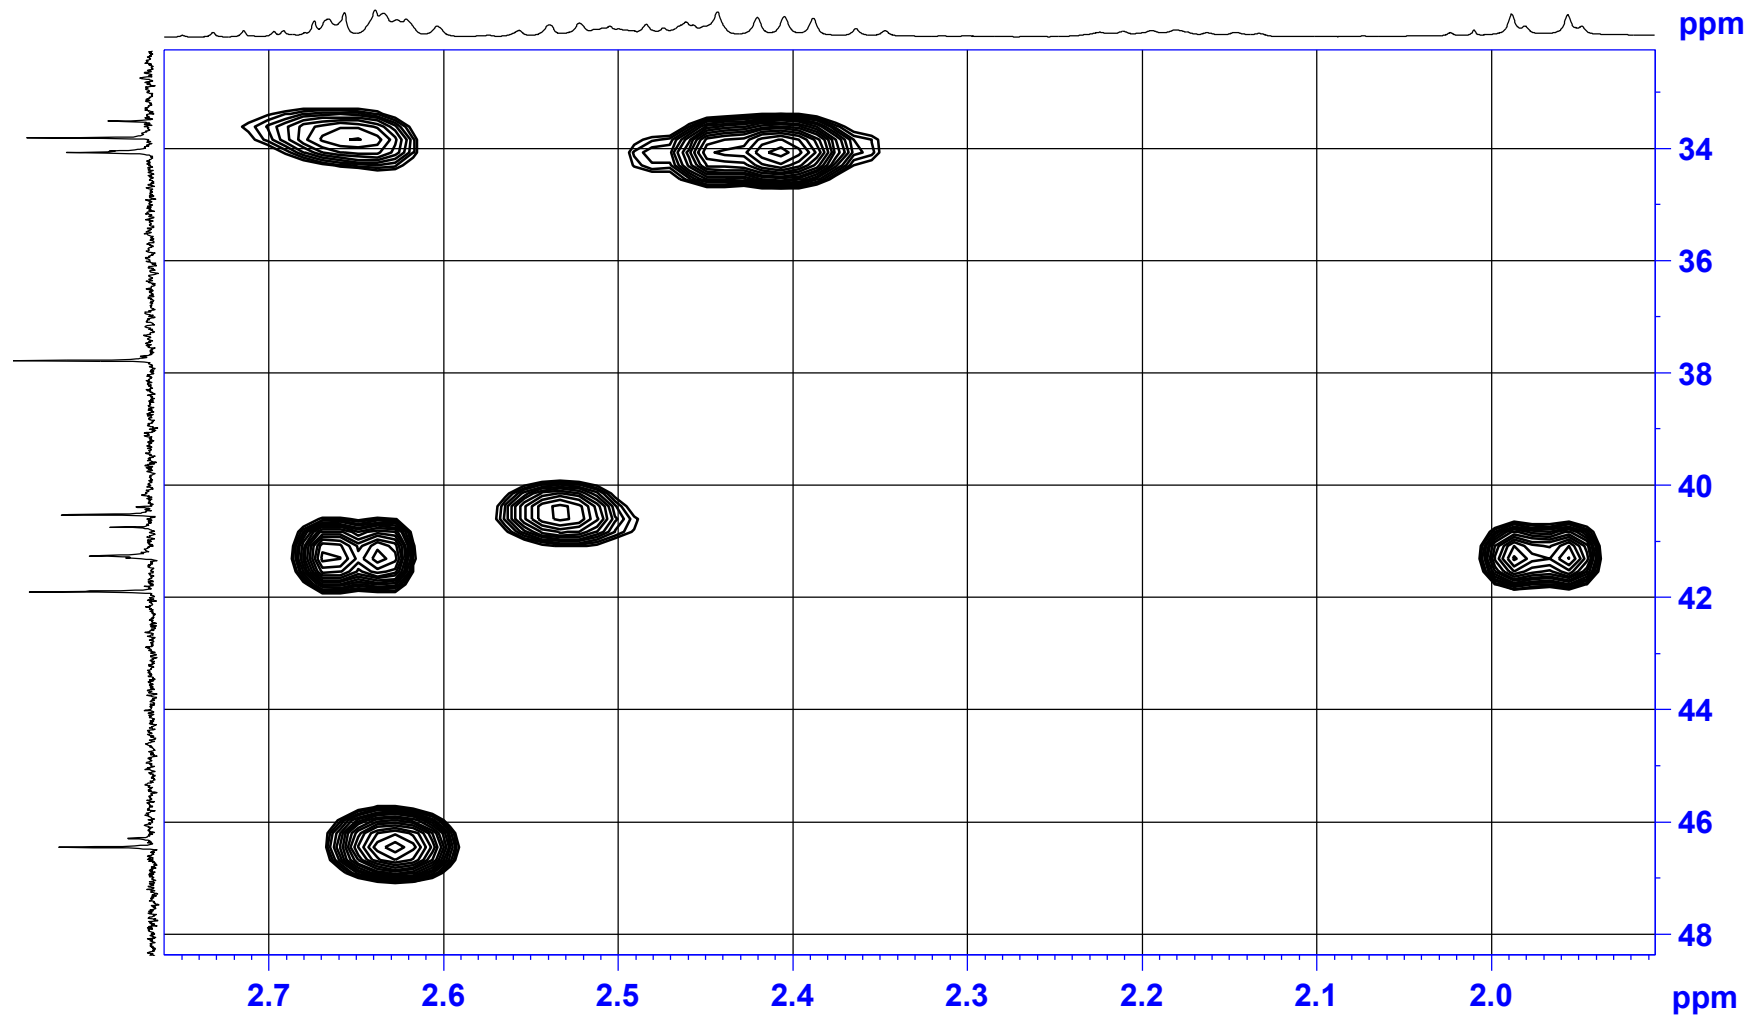

# HSQC spectrum of Krishnolide B (2) in CDCl<sub>3</sub>

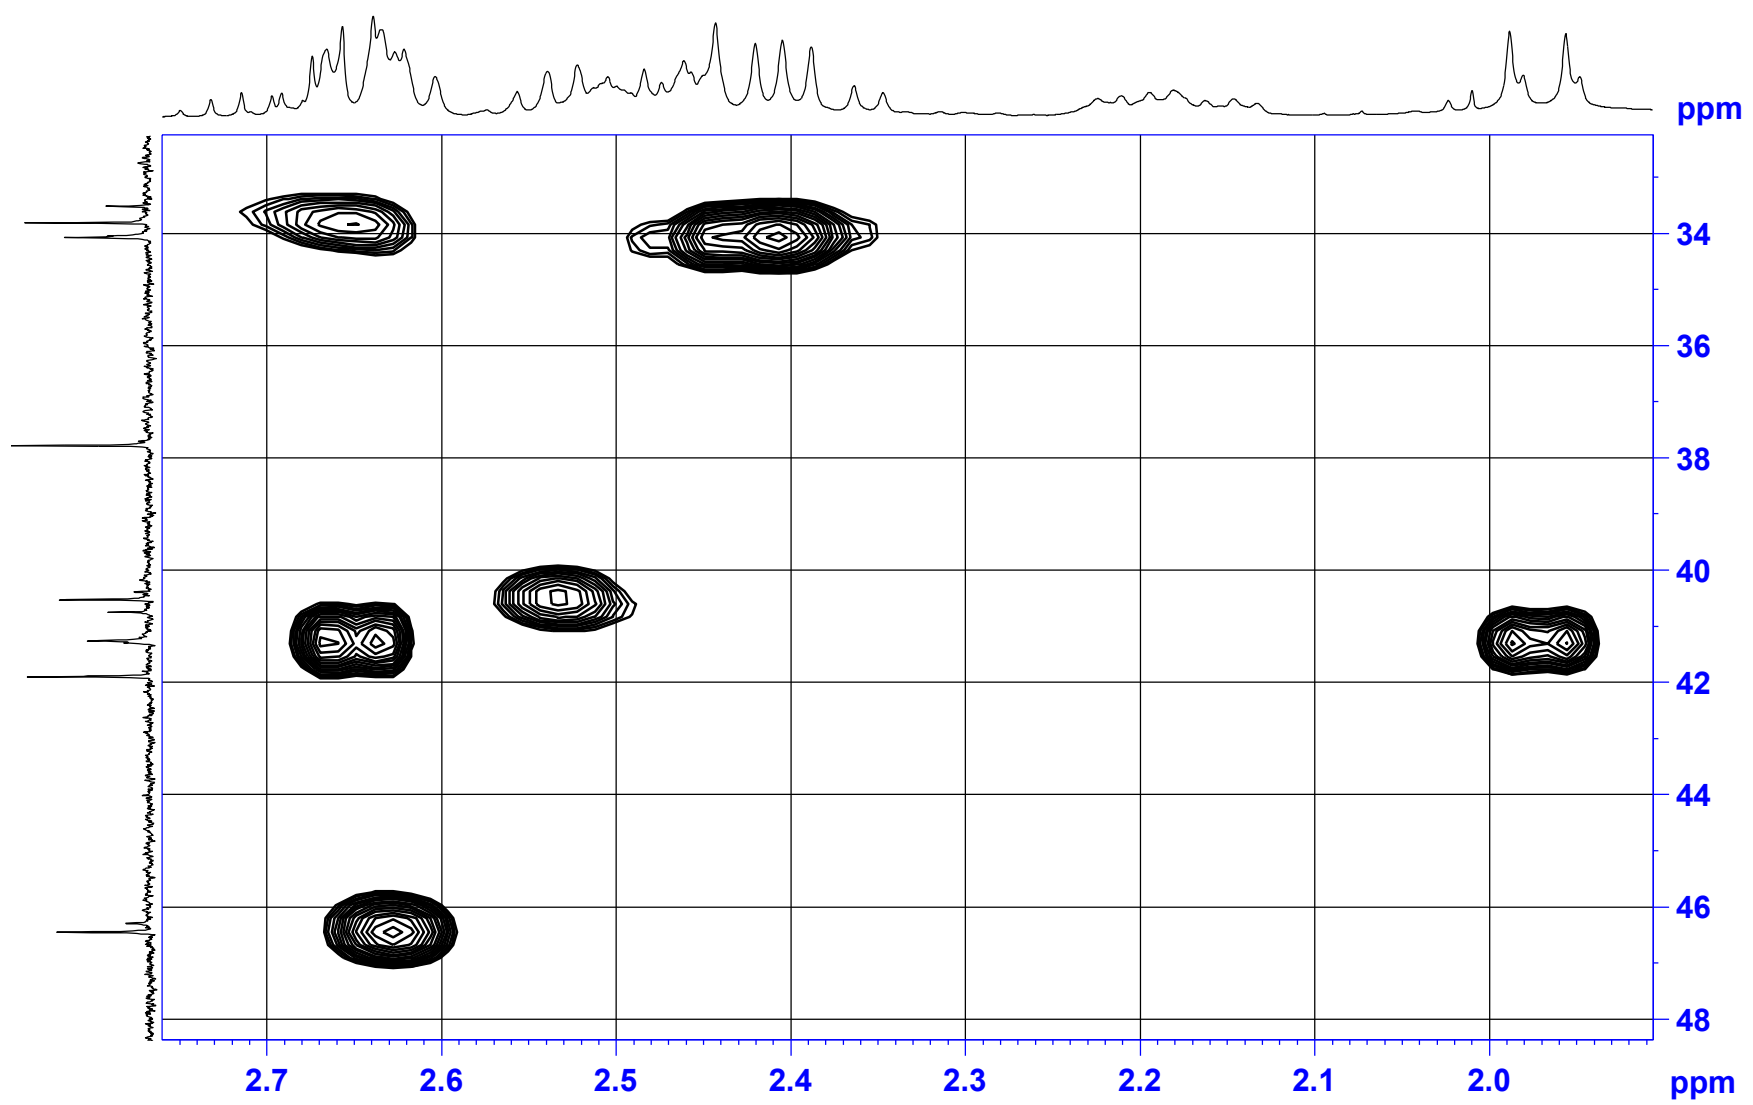

HSQC spectrum of Krishnolide B (2) in CDCl<sub>3</sub>

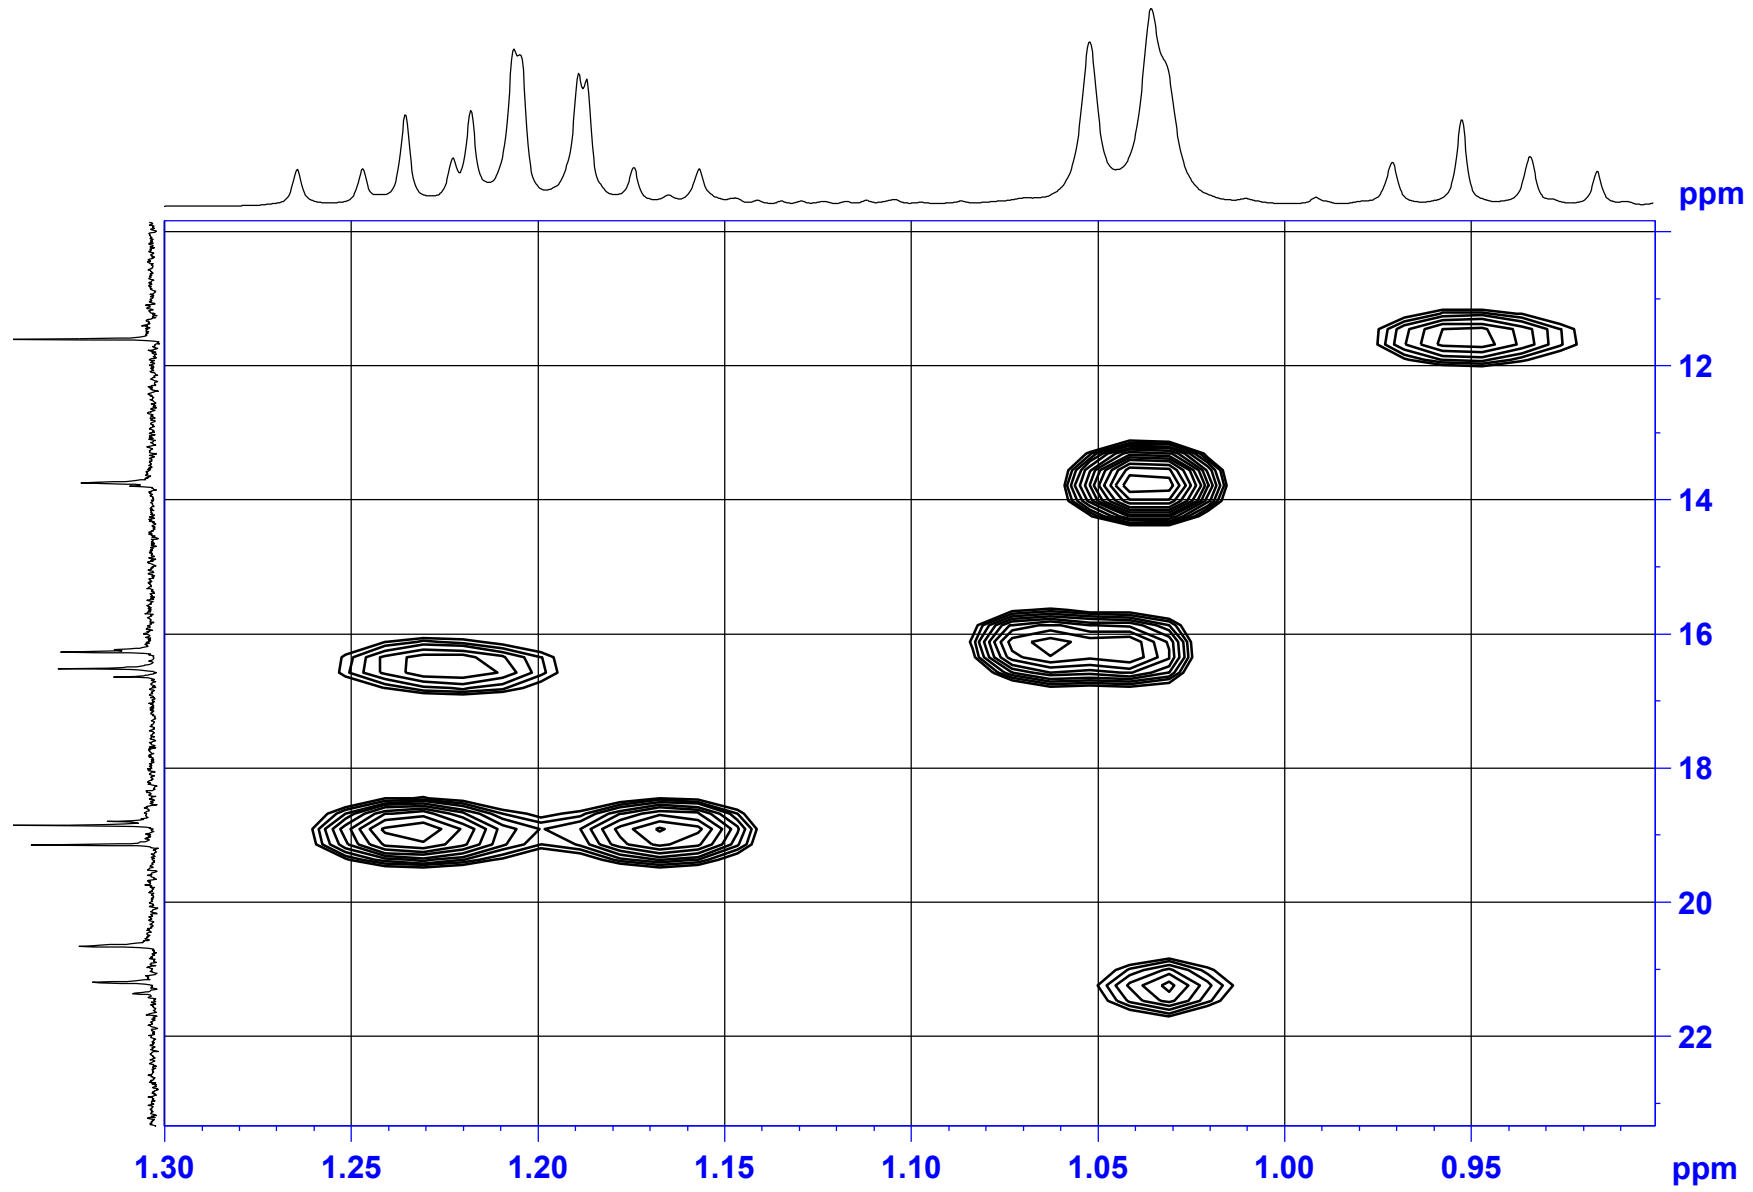

# HMBC spectrum of Krishnolide B (2) in CDCl<sub>3</sub>

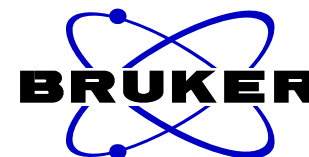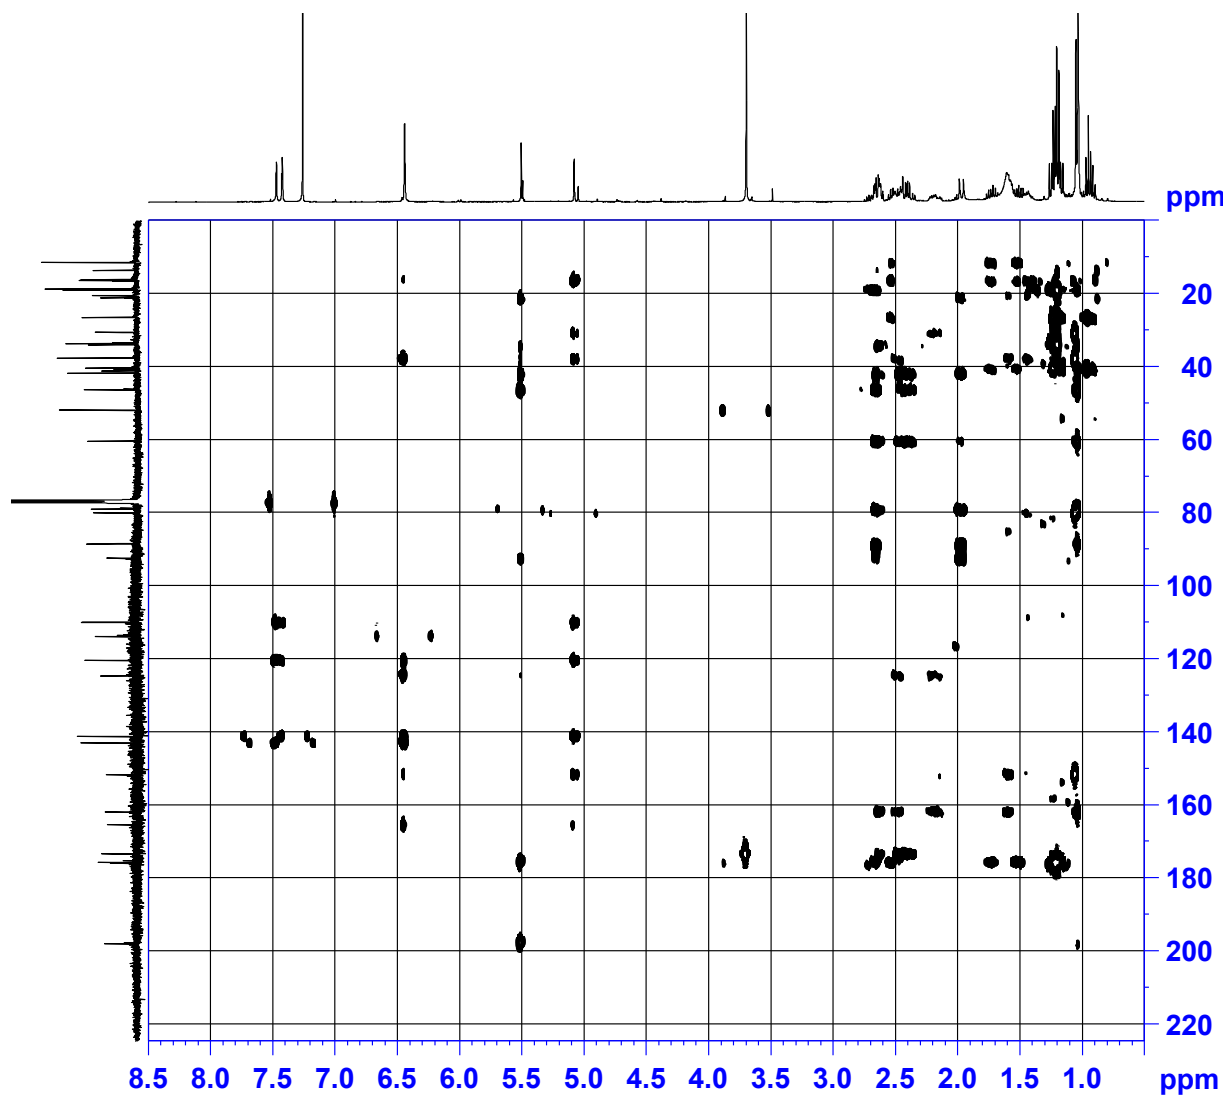

```

NAME           ZQ-19
EXPNO          6
PROCNO         1
Date_          20170121
Time           18.01
INSTRUM        spect
PROBHD         5 mm CPPBBO BB
PULPROG        hmbcgp1pndqf
TD             4096
SOLVENT        CDCl3
NS             32
DS             16
SWH            5197.505 Hz
FIDRES         1.268922 Hz
AQ             0.3940852 sec
RG             208.5
DW             96.200 usec
DE             10.00 usec
TE             297.0 K
CNST2          145.0000000
CNST13         10.0000000
D0             0.00000300 sec
D1             1.50000000 sec
D2             0.00344828 sec
D6             0.05000000 sec
D16            0.00020000 sec
IN0            0.00002080 sec
    
```

```

===== CHANNEL f1 =====
SFO1          400.1323208 MHz
NUC1           1H
P1             11.50 usec
P2             23.00 usec
ND0            2
TD             128
SFO1          100.6233 MHz
FIDRES         187.800476 Hz
SW             238.896 ppm
FnmODE        QF
SI             2048
SF             400.1300061 MHz
WDW            SINE
SSB            0
LB             0.00 Hz
GB             0
PC             1.40
SI             1024
MC2            QF
SF             100.6127562 MHz
WDW            SINE
SSB            0
LB             0.00 Hz
GB             0
    
```



# HMBC spectrum of Krishnolide B (2) in CDCl<sub>3</sub>

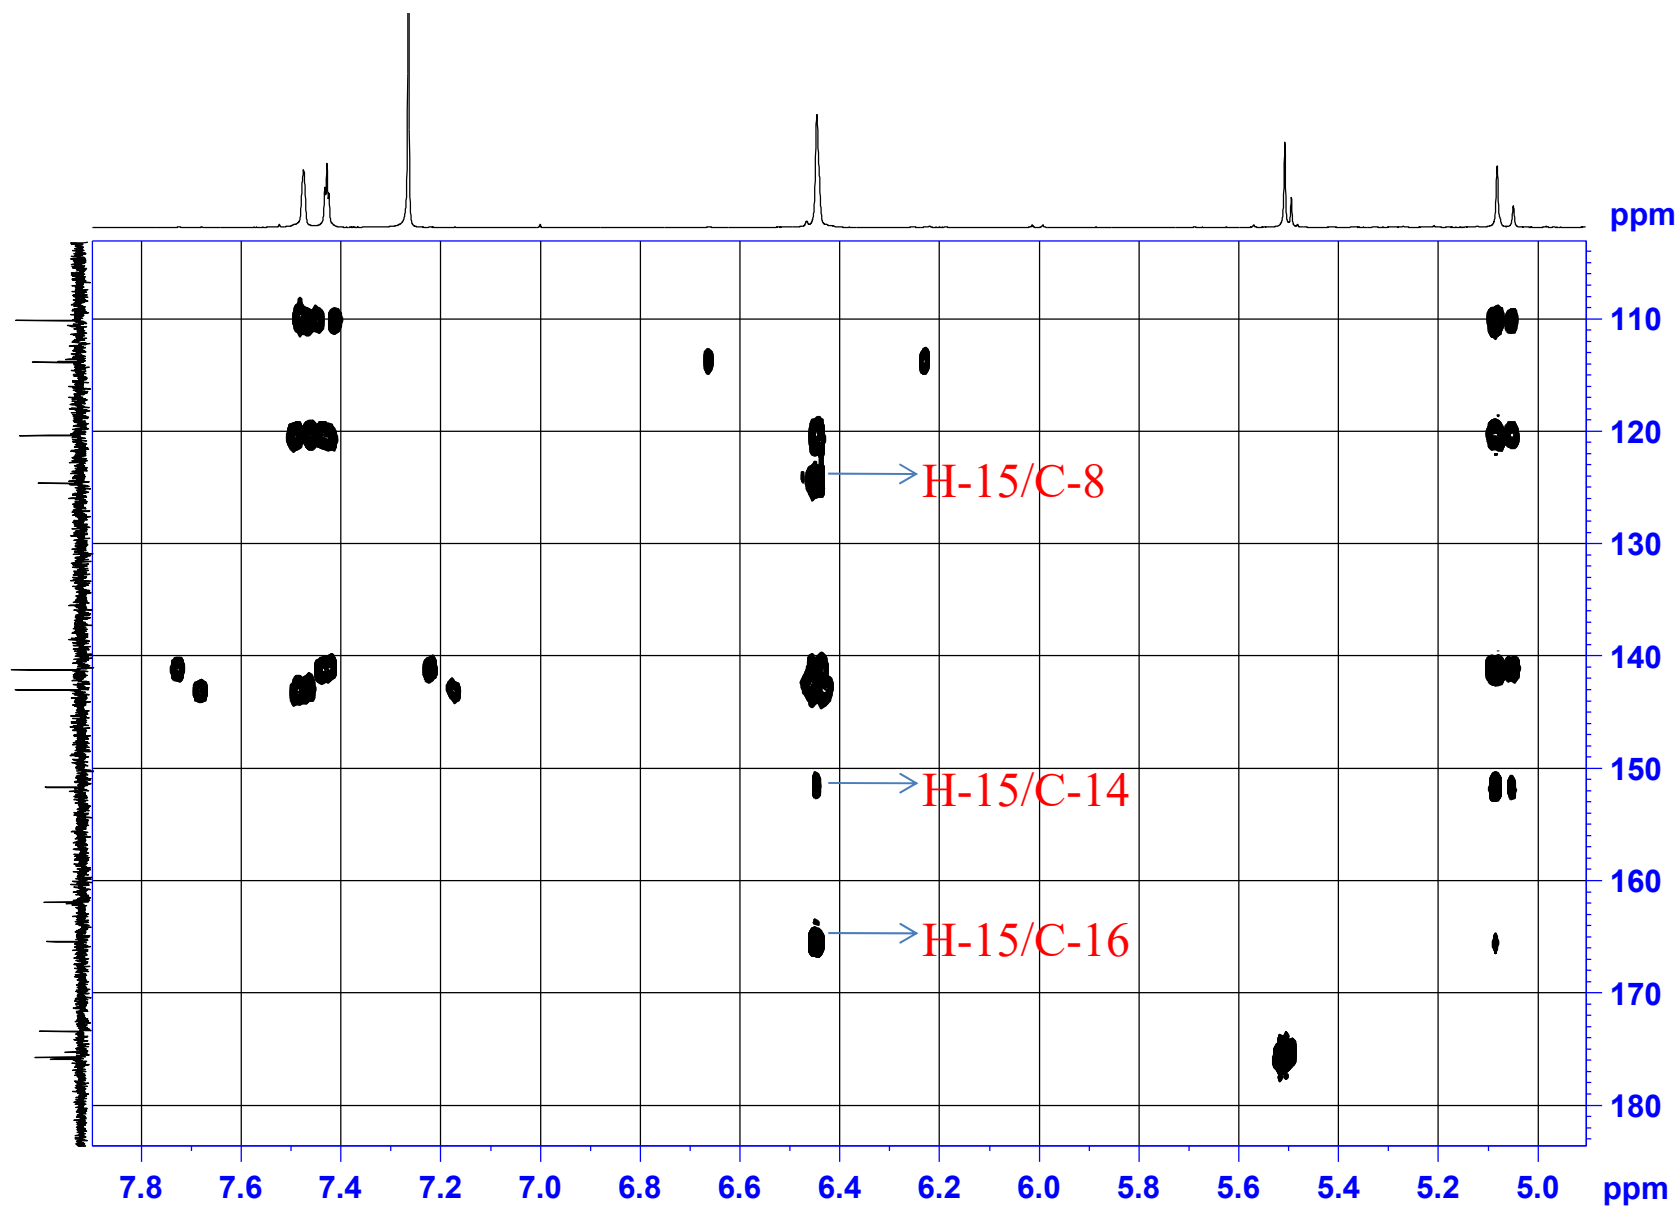

# HMBC spectrum of Krishnolide B (2) in CDCl<sub>3</sub>

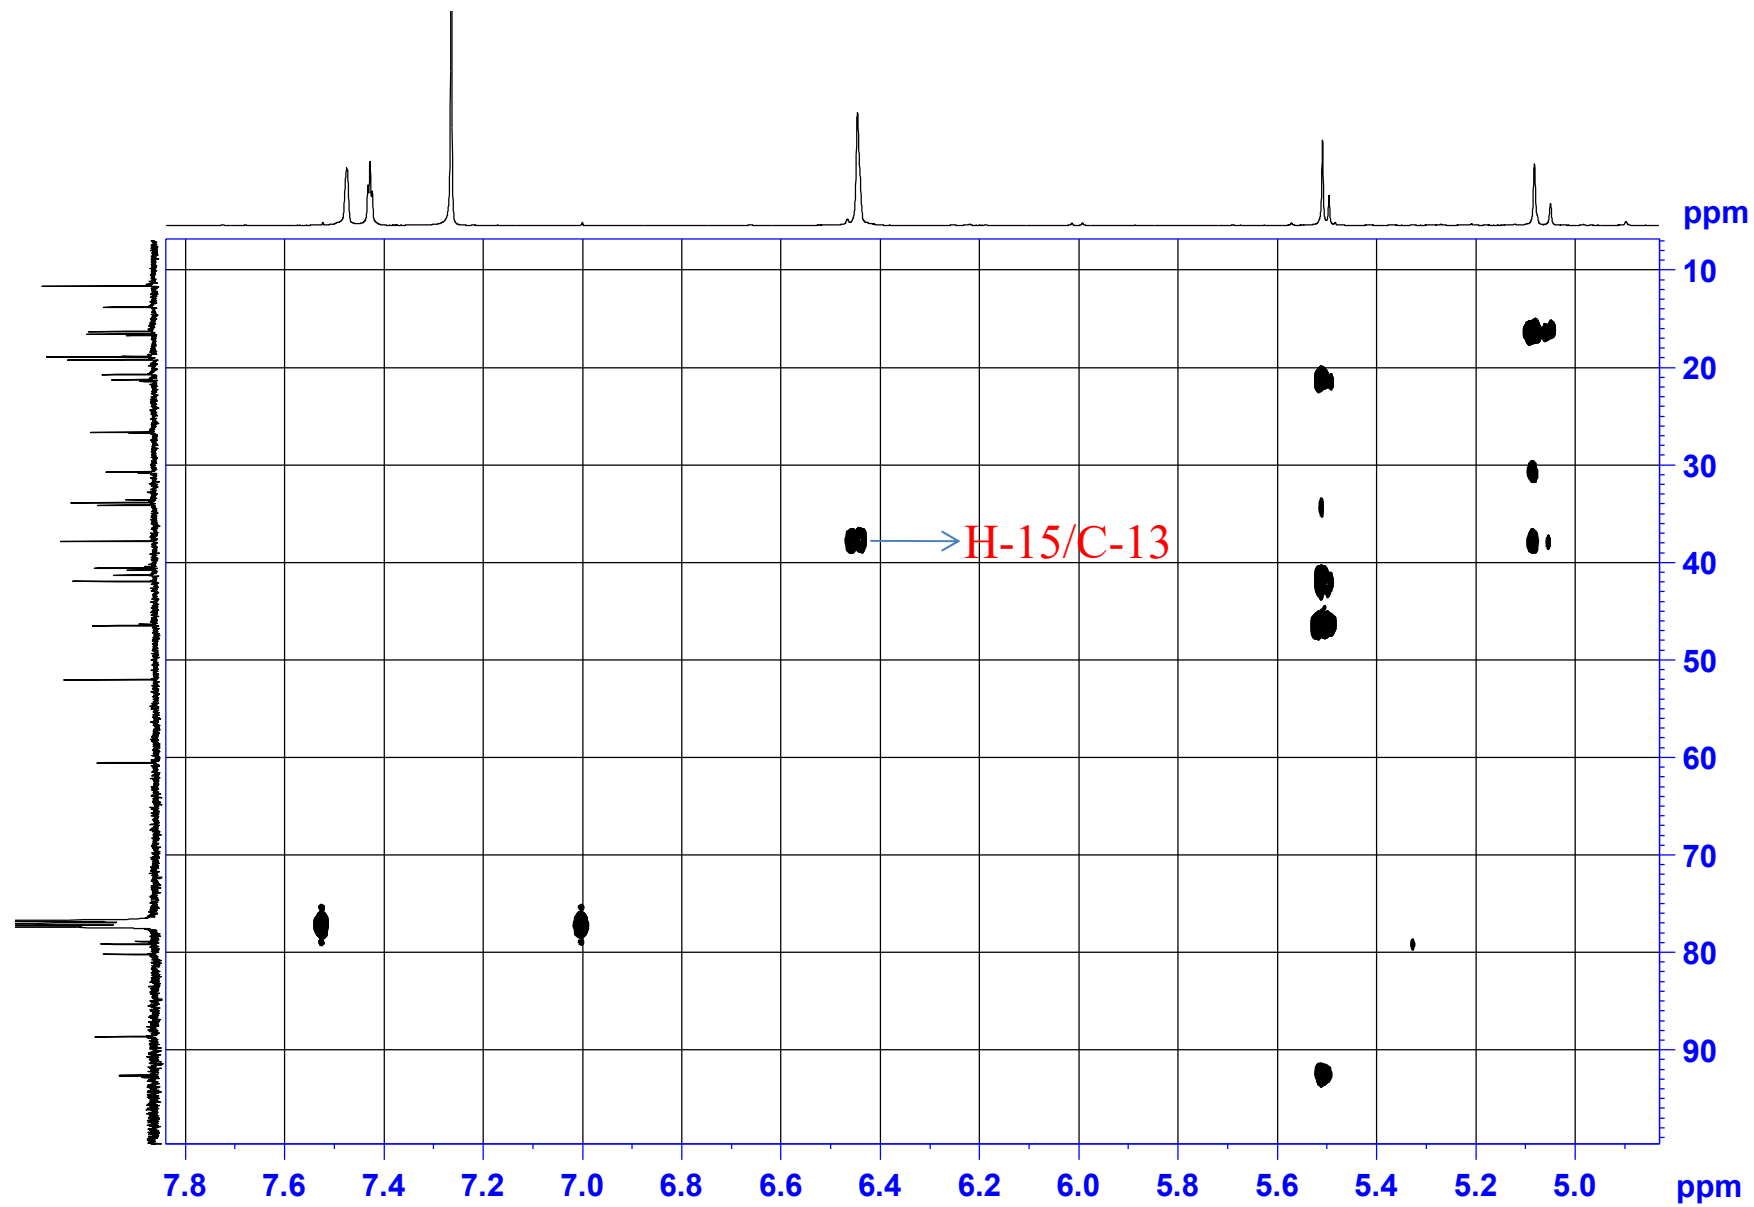

# HMBC spectrum of Krishnolide B (2) in CDCl<sub>3</sub>

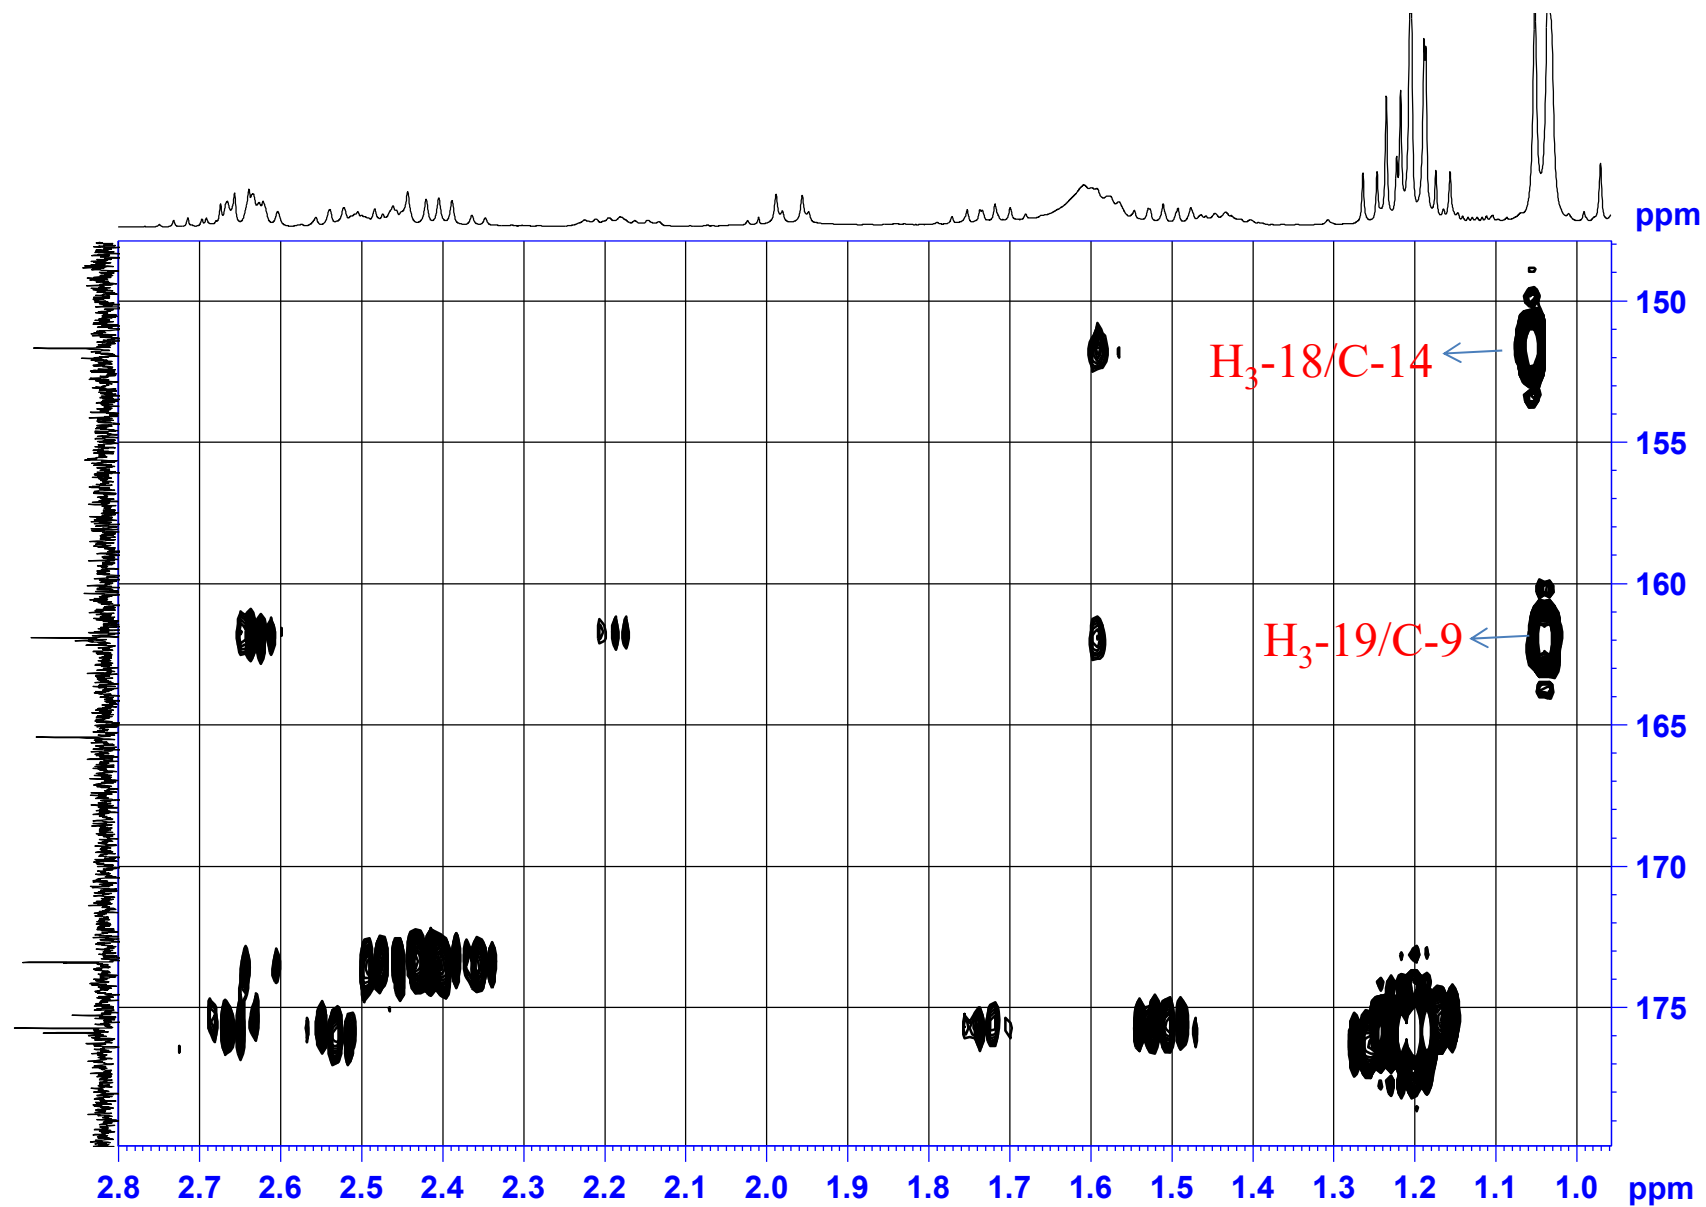

# HMBC spectrum of Krishnolide B (2) in CDCl<sub>3</sub>

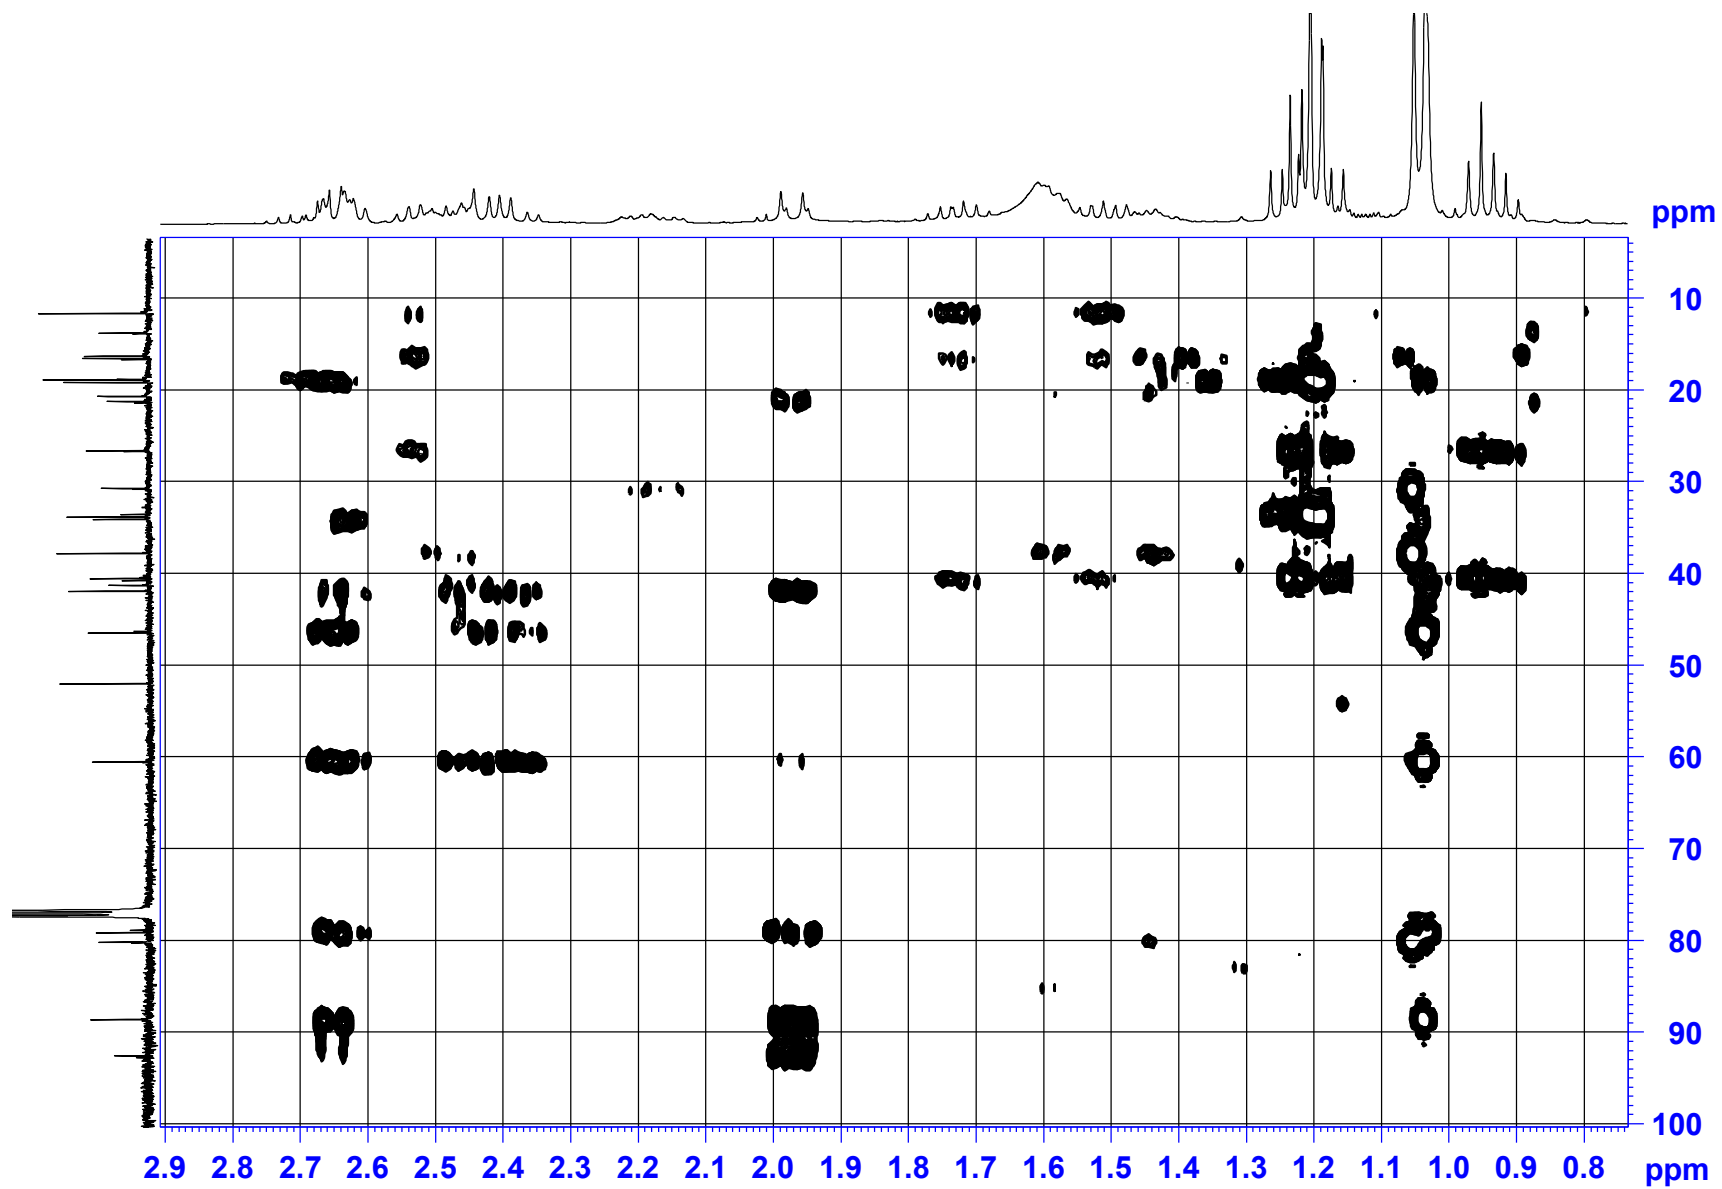

# HMBC spectrum of Krishnolide B (2) in CDCl<sub>3</sub>

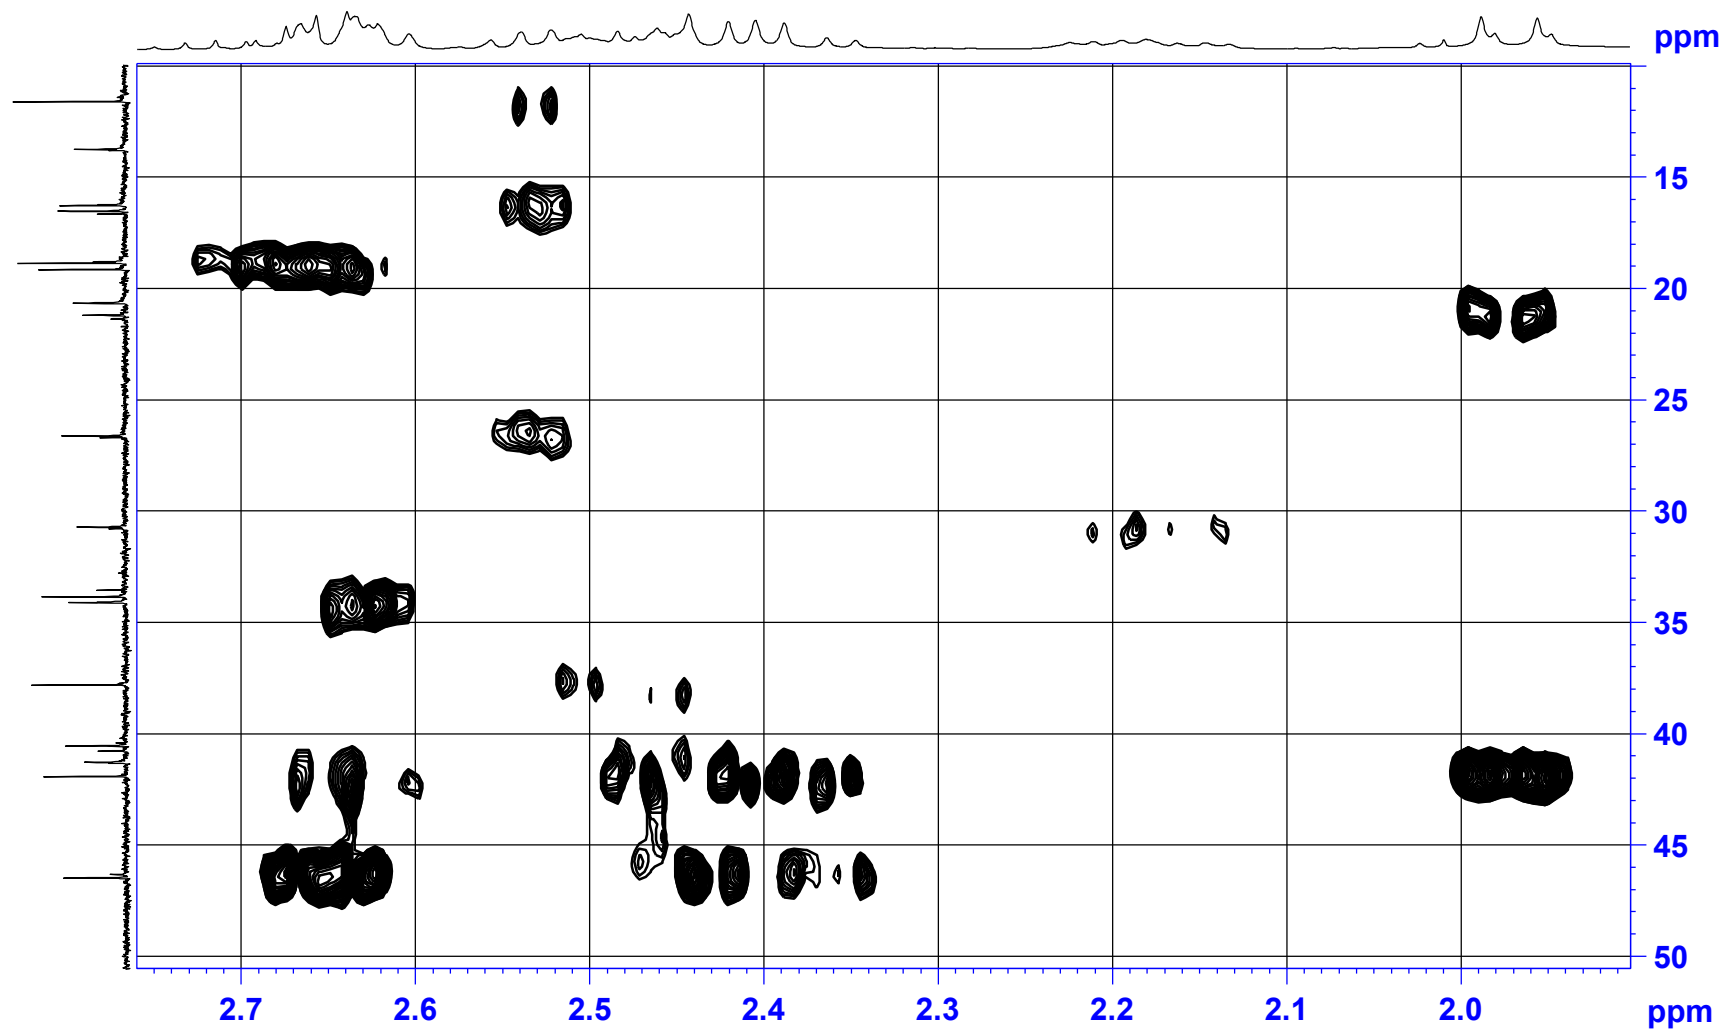

# HMBC spectrum of Krishnolide B (2) in CDCl<sub>3</sub>

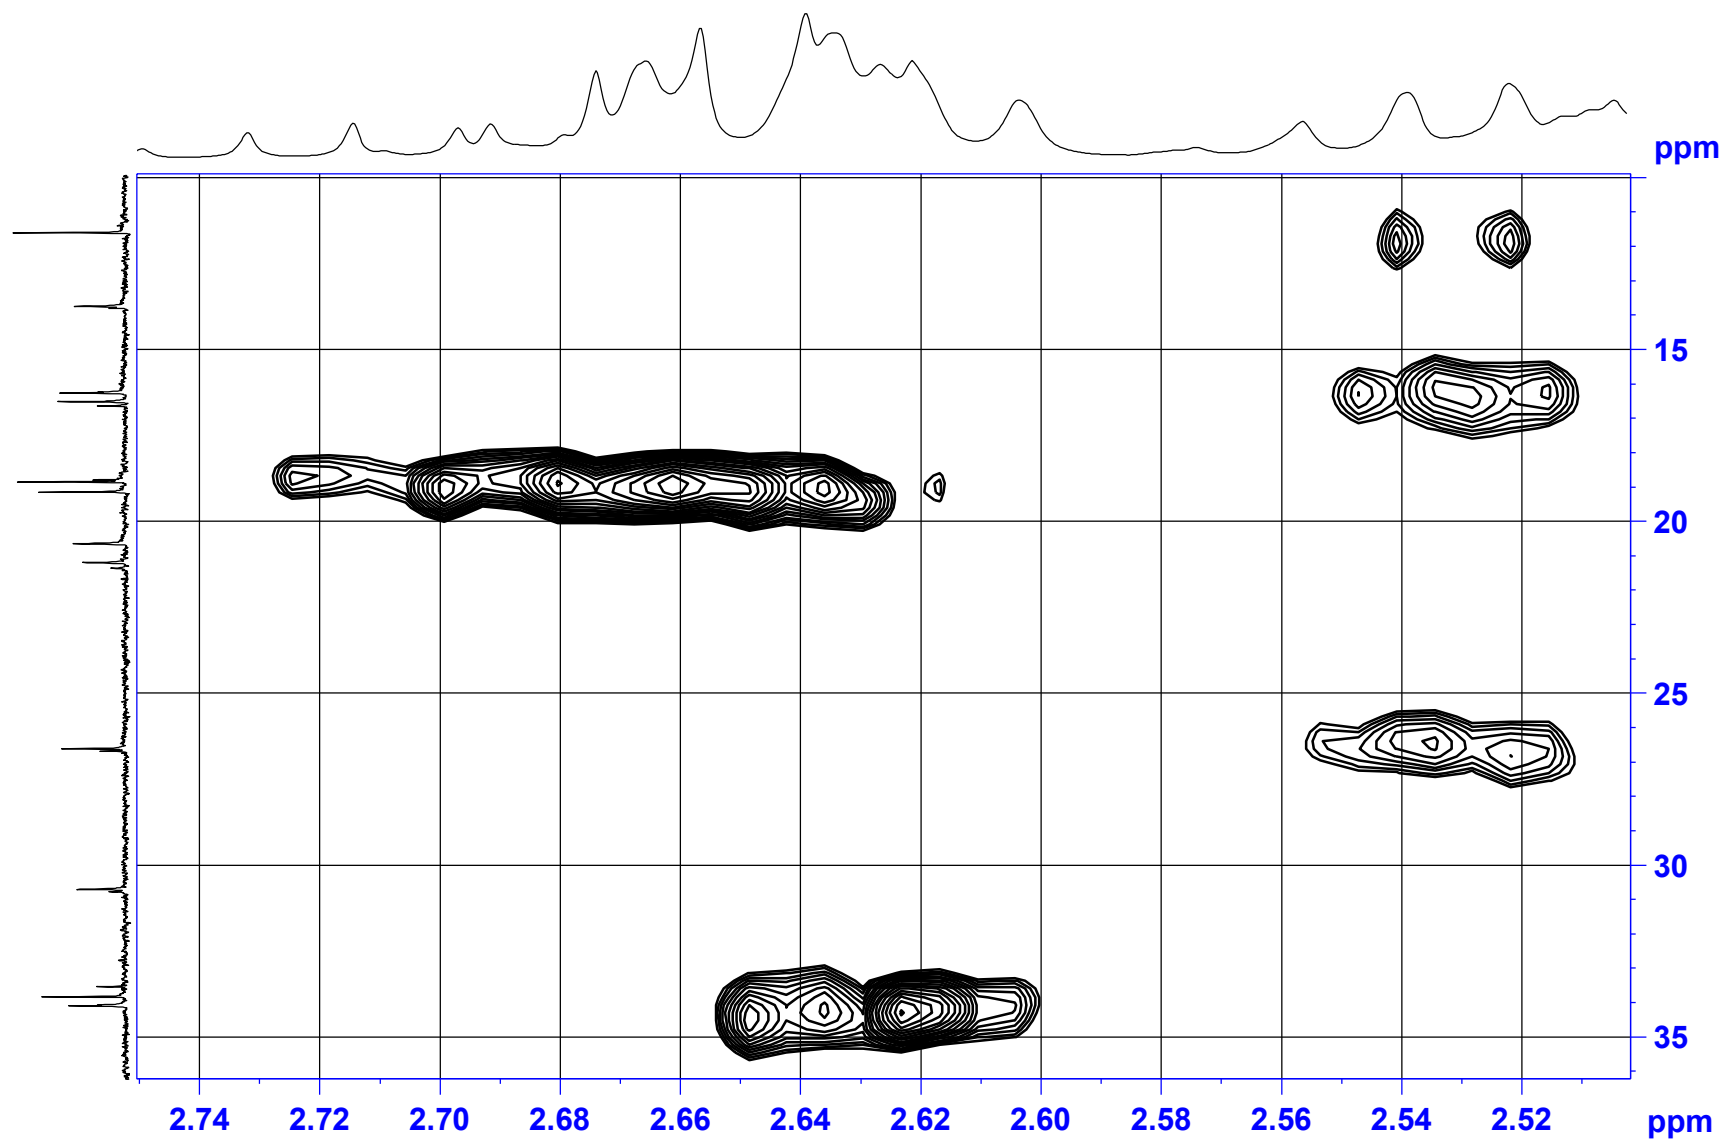

# HMBC spectrum of Krishnolide B (2) in CDCl<sub>3</sub>

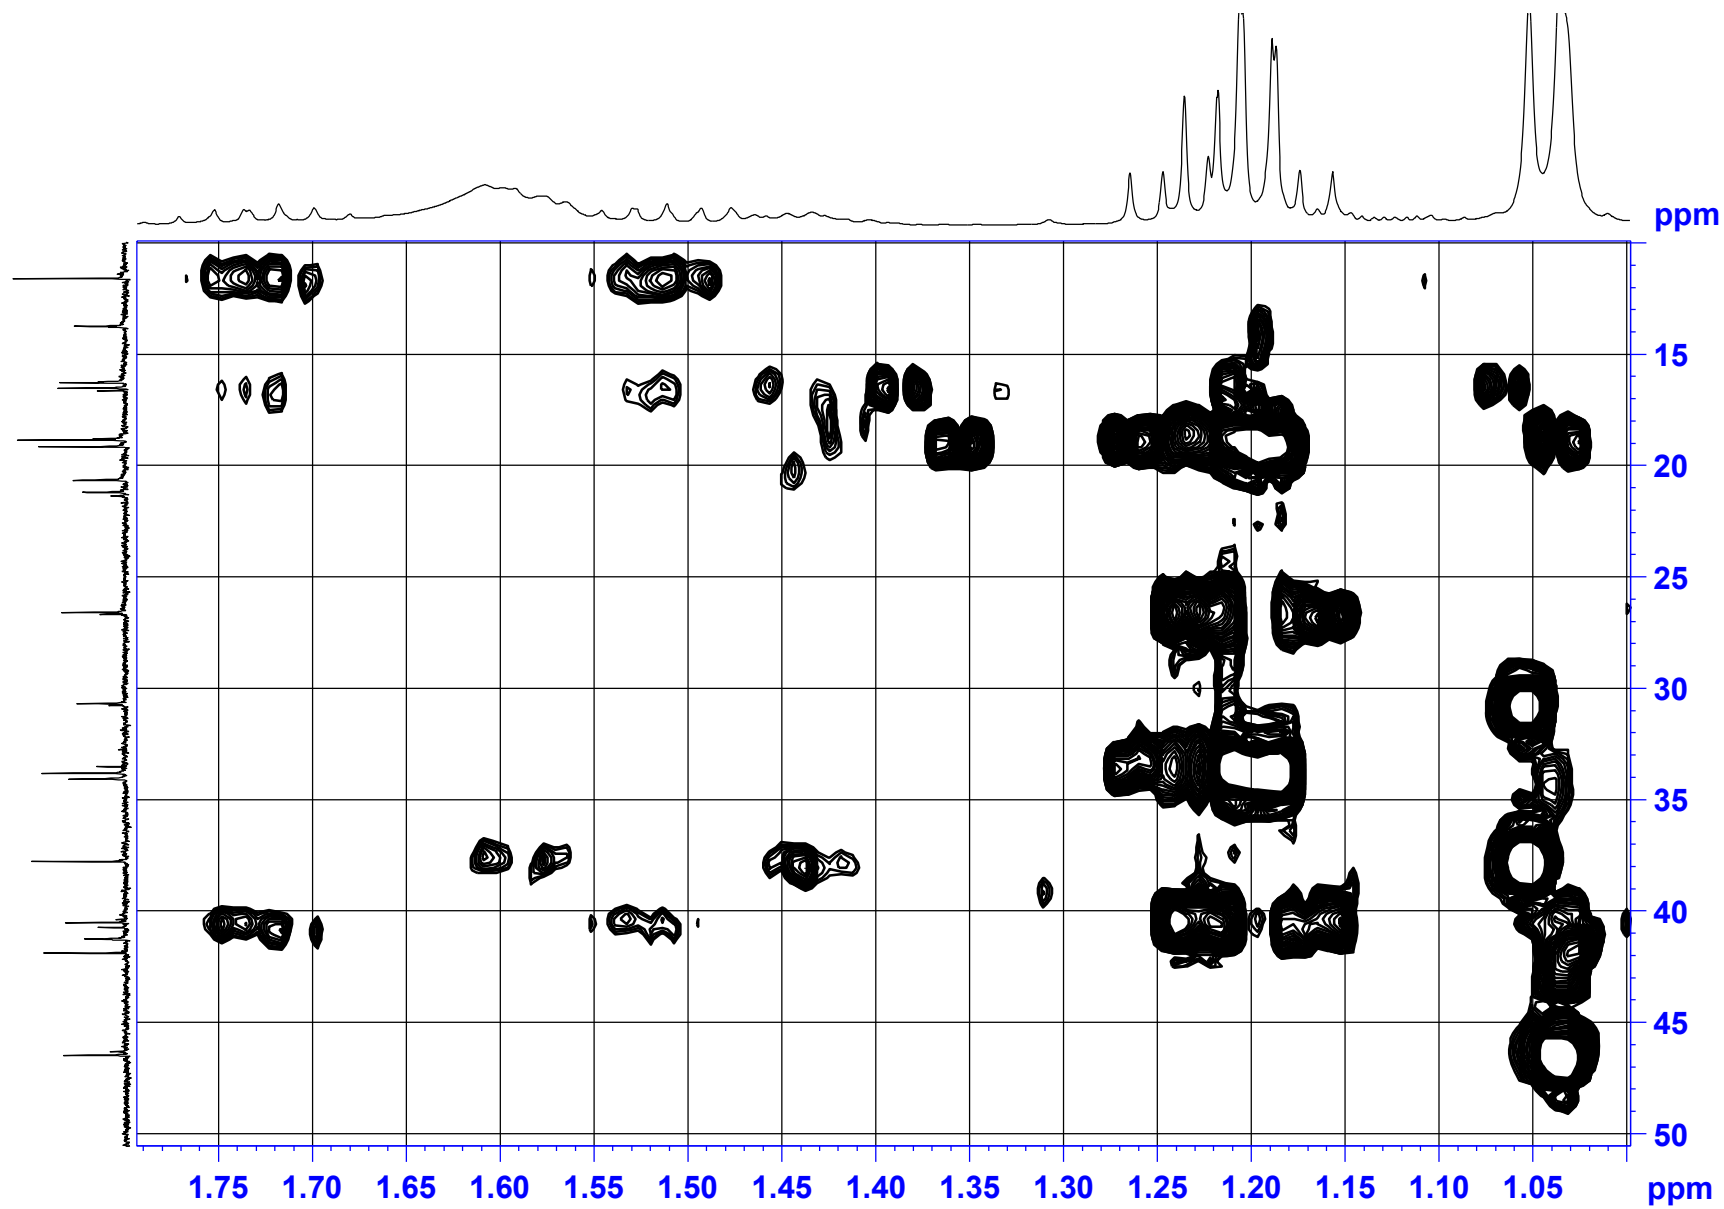

# HMBC spectrum of Krishnolide B (2) in CDCl<sub>3</sub>

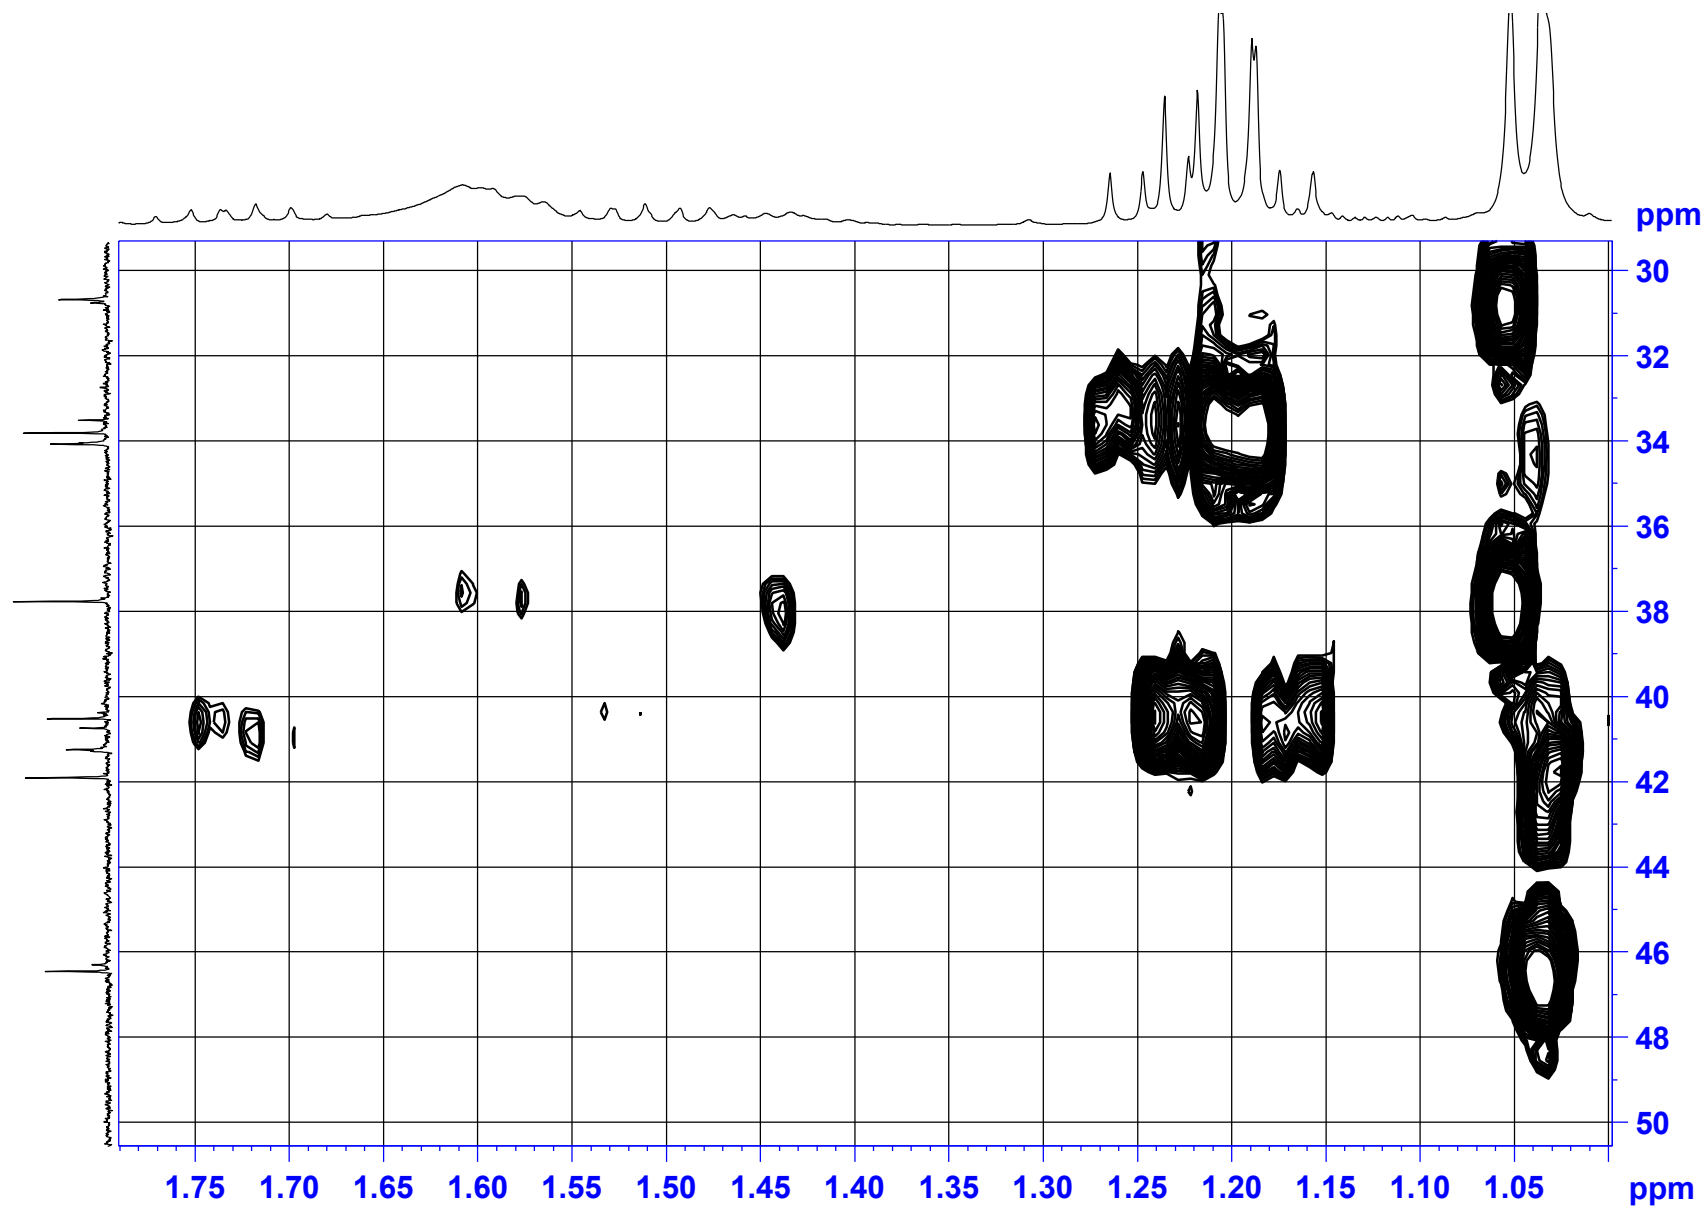



# HMBC spectrum of Krishnolide B (2) in CDCl<sub>3</sub>

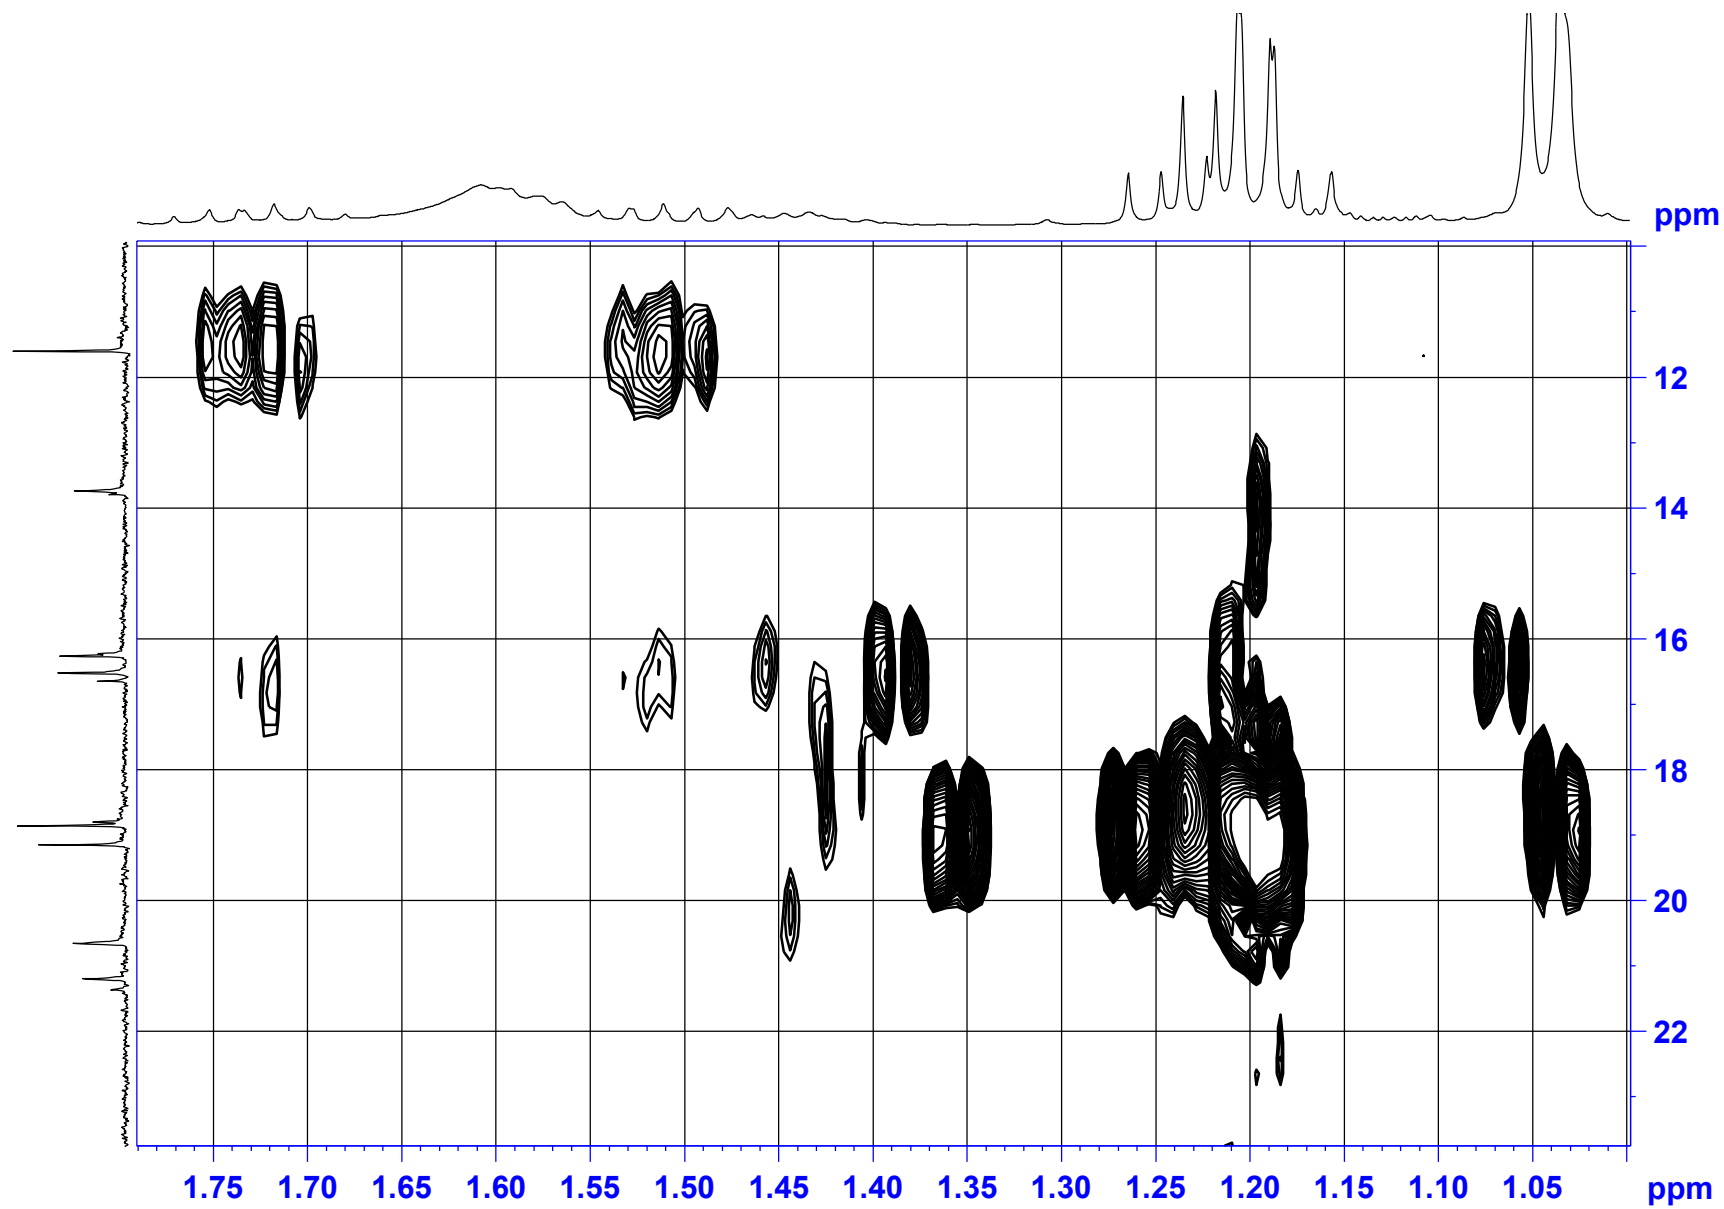

# NOESY spectrum of Krishnolide B (2) in CDCl<sub>3</sub>

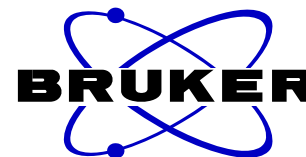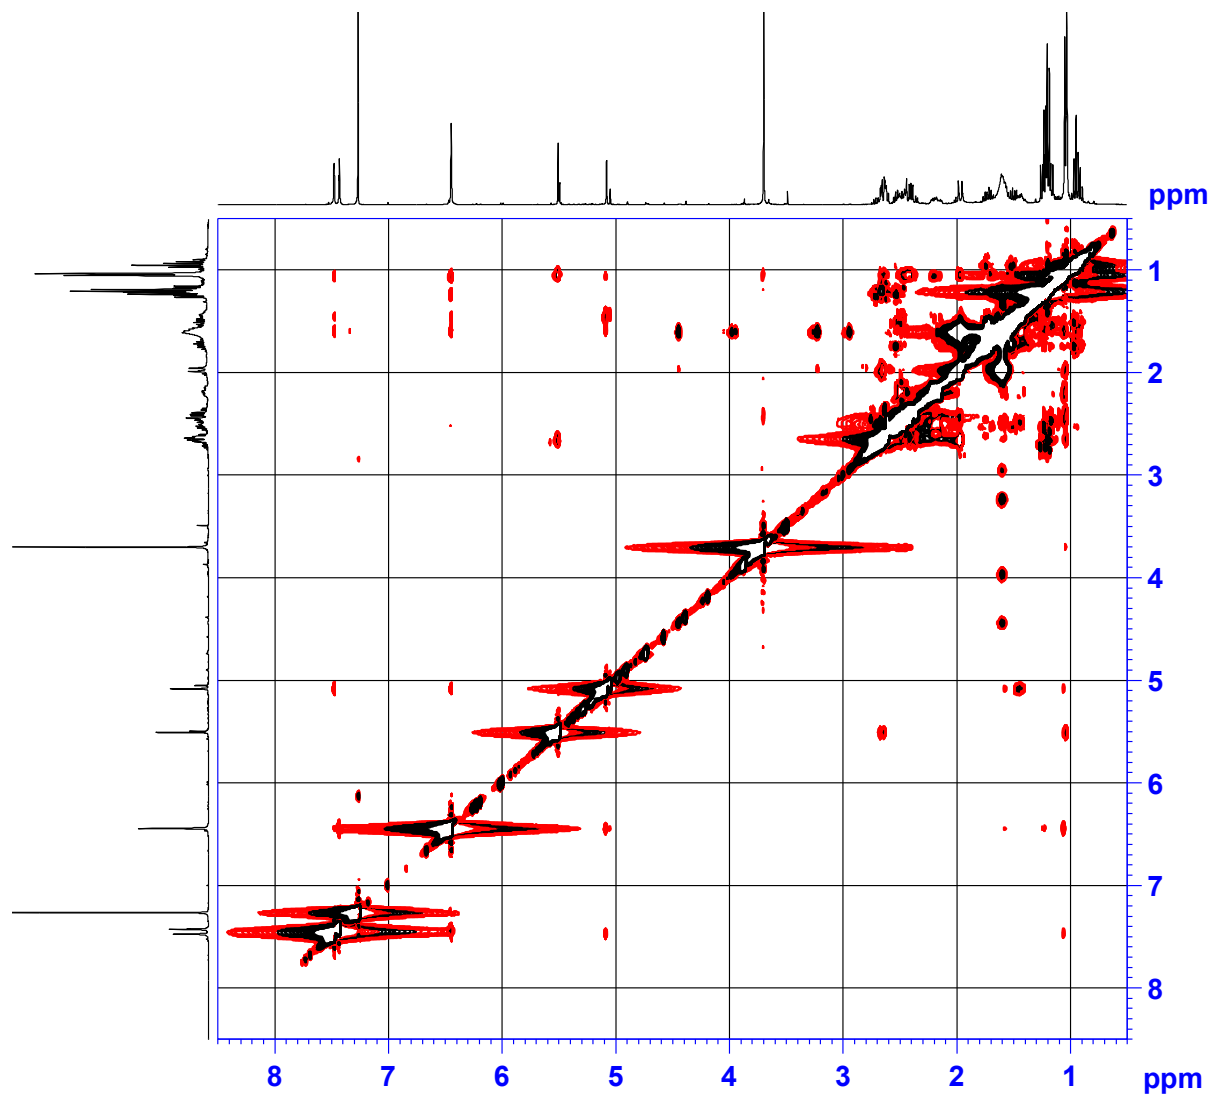

```

NAME           ZQ-19
EXPNO          7
PROCNO         1
Date_          20170121
Time           20.16
INSTRUM        spect
PROBHD         5 mm CPPBBO BB
PULPROG        noesygpphpp
TD             2048
SOLVENT        CDCl3
NS             16
DS             32
SWH            4000.000 Hz
FIDRES         1.953125 Hz
AQ             0.2560500 sec
RG             208.5
DW             125.000 usec
DE             10.00 usec
TE             297.0 K
D0             0.00011036 sec
D1             1.99385595 sec
D8             0.30000001 sec
D11            0.03000000 sec
D12            0.00002000 sec
D16            0.00020000 sec
IN0            0.00025000 sec
    
```

```

===== CHANNEL f1 =====
SFO1          400.1318006 MHz
NUC1          1H
P1            11.50 usec
P2            23.00 usec
P17           2500.00 usec
ND0           1
TD            256
SFO1          400.1318 MHz
FIDRES        15.625000 Hz
SW            9.997 ppm
FnMODE        States-TPPI
SI            1024
SF            400.1300061 MHz
WDW           QSINE
SSB           2
LB            0.00 Hz
GB            0
PC            1.00
SI            1024
MC2           States-TPPI
SF            400.1300061 MHz
WDW           QSINE
SSB           2
LB            0.00 Hz
GB            0
    
```

NOESY spectrum of Krishnolide B (2) in CDCl<sub>3</sub>

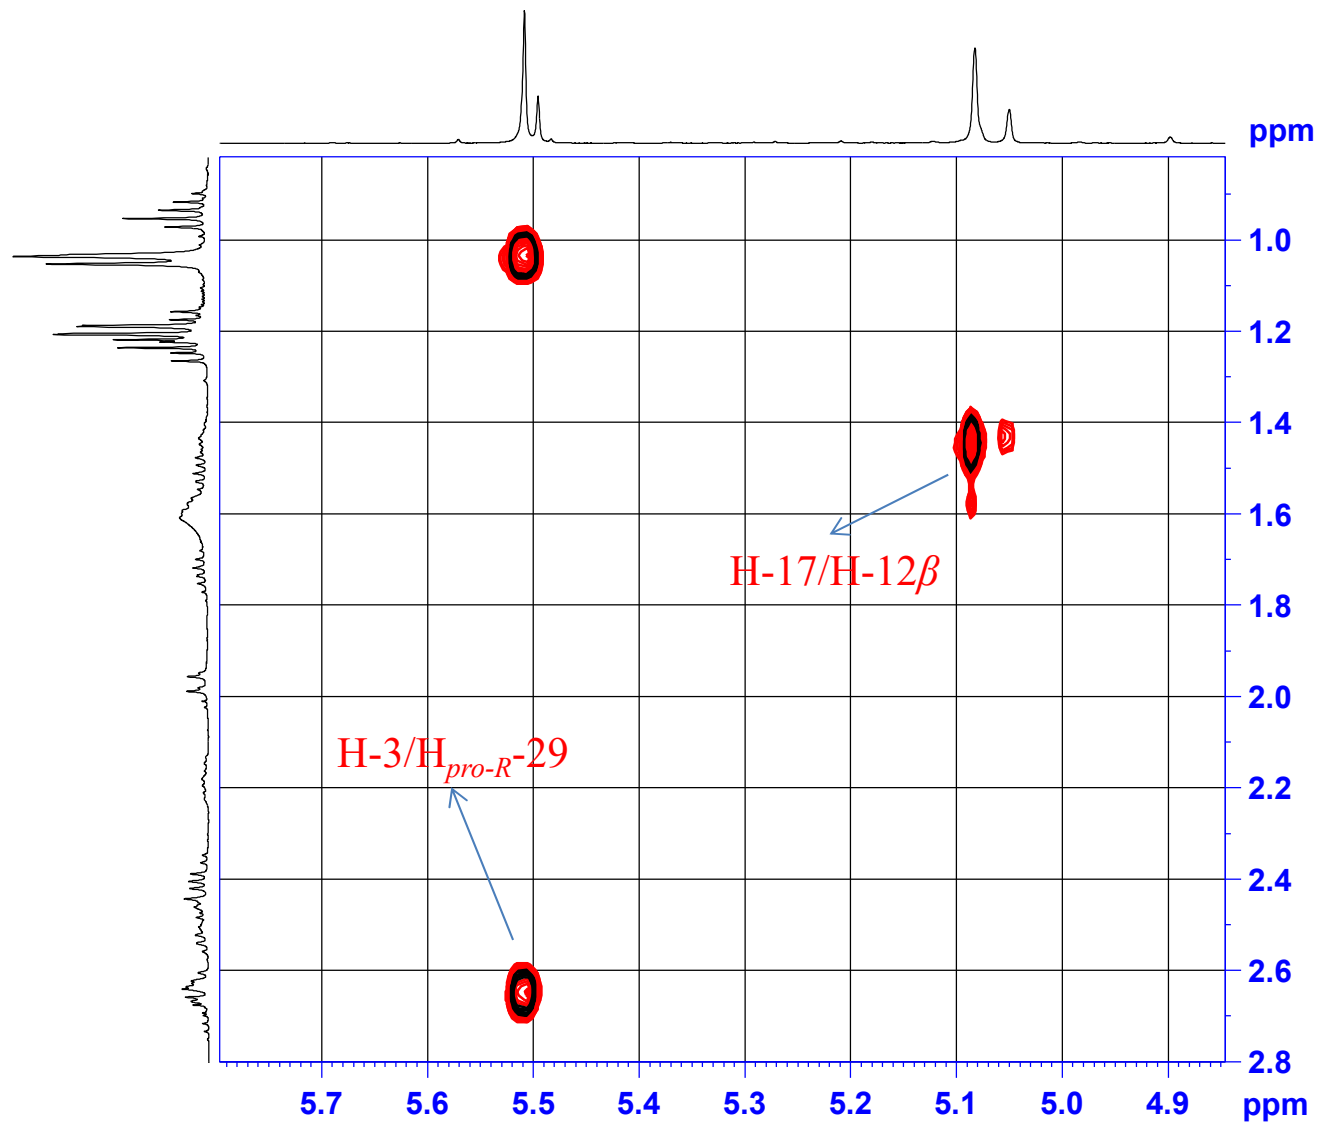

NOESY spectrum of Krishnolide B (2) in CDCl<sub>3</sub>

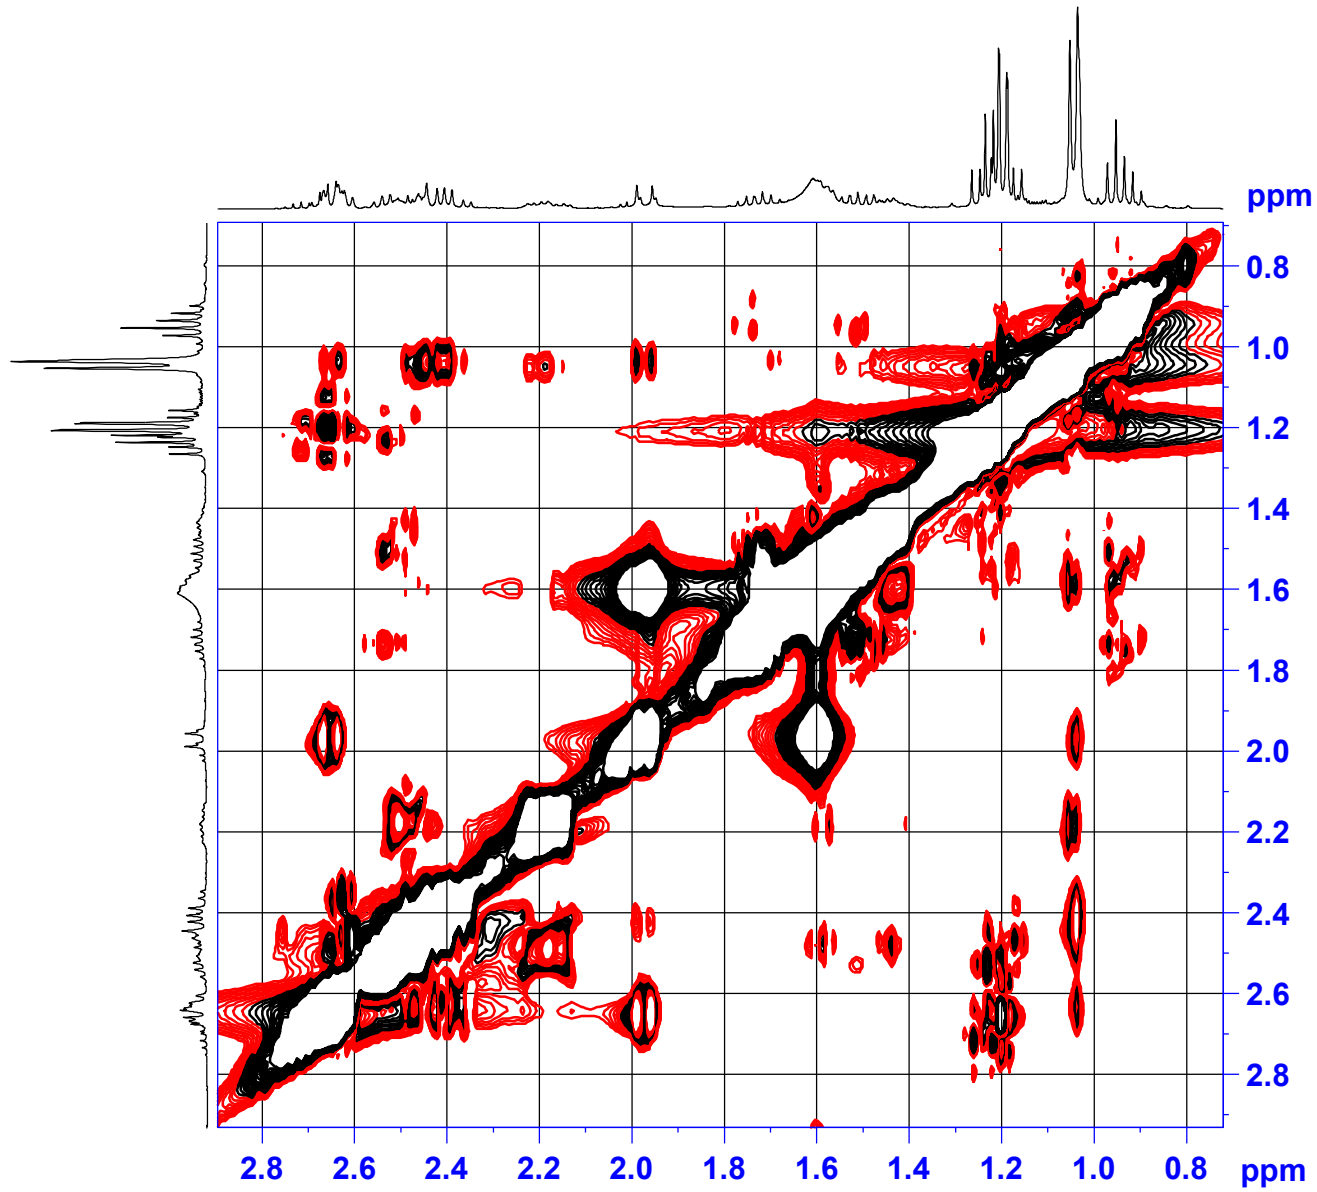

NOESY spectrum of Krishnolide B (2) in CDCl<sub>3</sub>

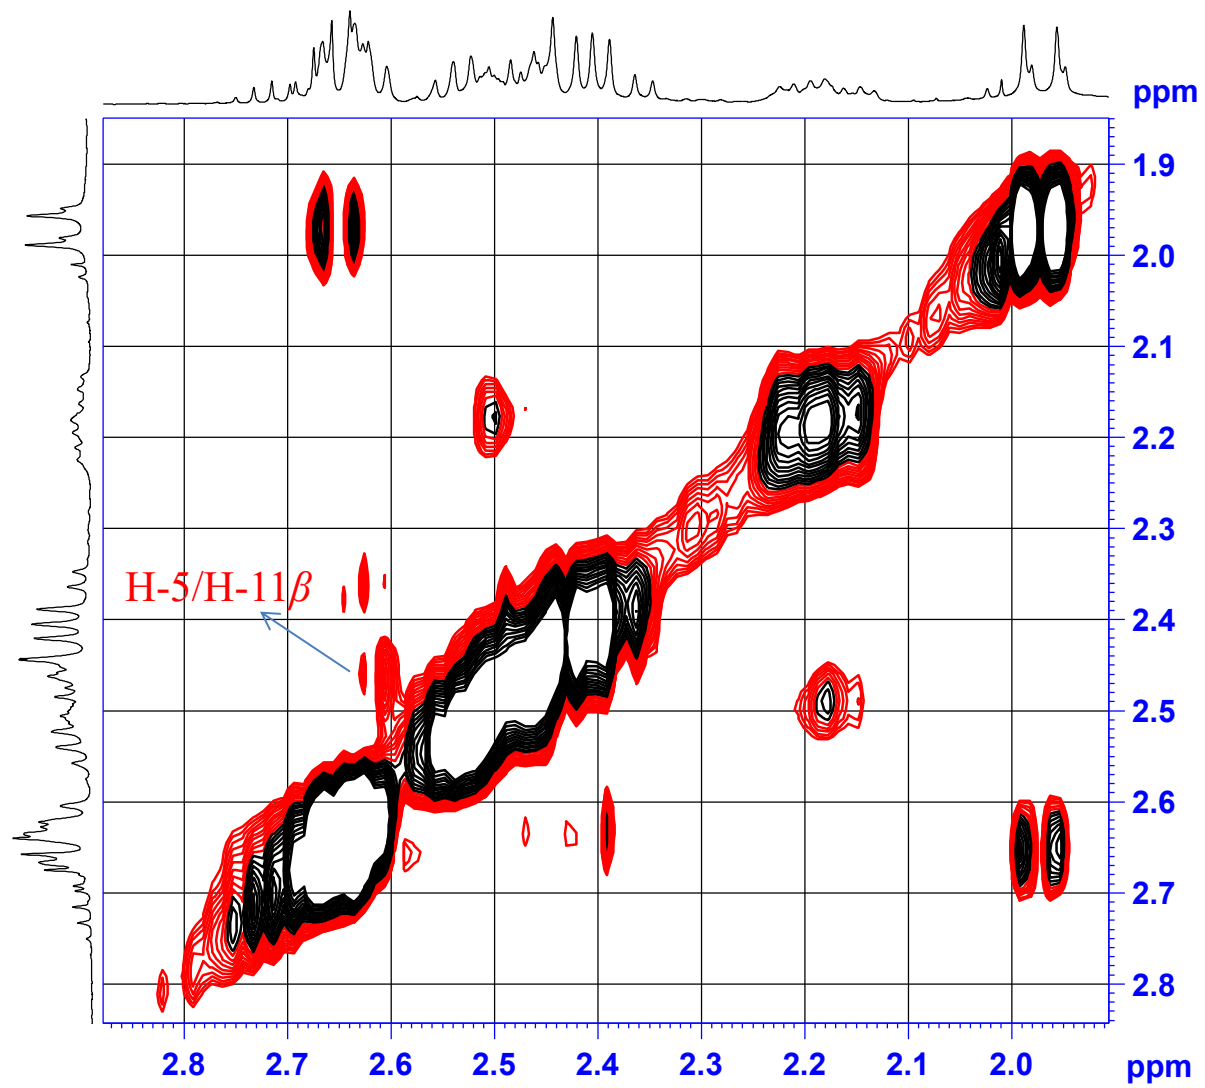

NOESY spectrum of Krishnolide B (2) in CDCl<sub>3</sub>

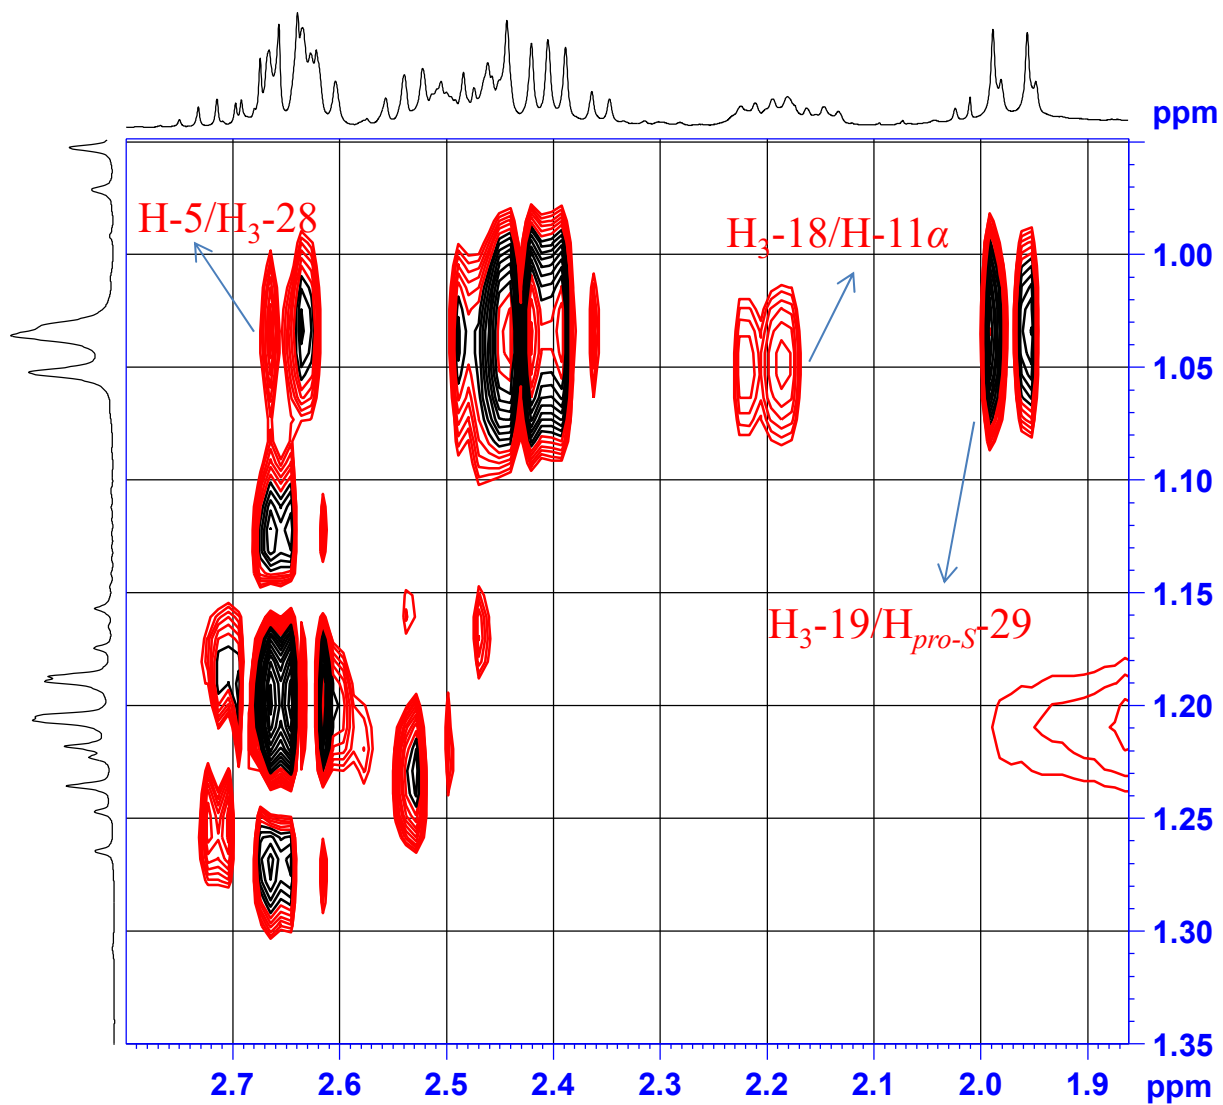

# HR-ESIMS of Krishnolide C (3)

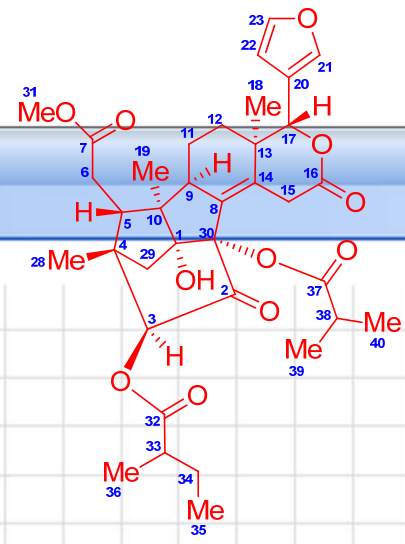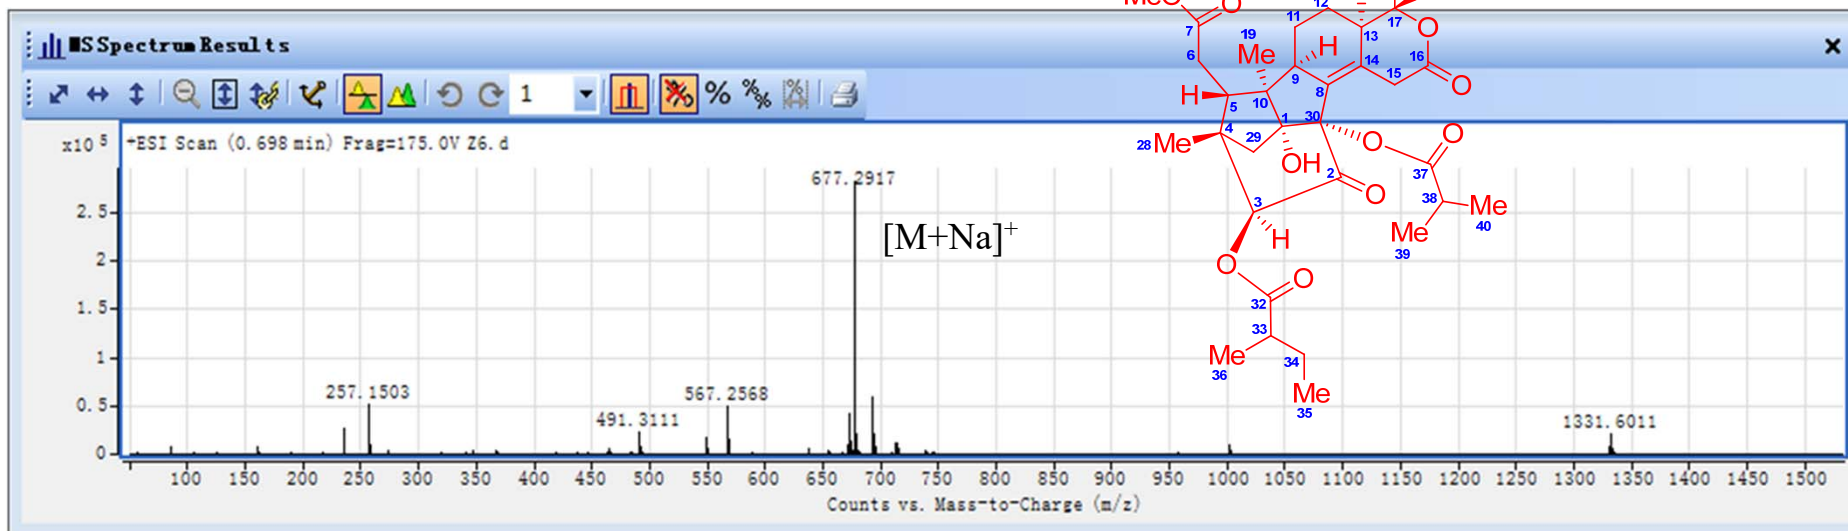

MS Formula Results: + Scan (0.698 min)

| m/z      | Ion     | Formula                                           | Abundance |
|----------|---------|---------------------------------------------------|-----------|
| 677.2917 | (M+Na)+ | C <sub>36</sub> H <sub>46</sub> NaO <sub>11</sub> | 281805.7  |

  

| Best                                | Formula (M)                                     | Ion Formula                                       | Score | Cross Score | Calc m/z | Diff (ppm) | Mass Match | Abund Match | Spacing Match |
|-------------------------------------|-------------------------------------------------|---------------------------------------------------|-------|-------------|----------|------------|------------|-------------|---------------|
| <input checked="" type="checkbox"/> | C <sub>36</sub> H <sub>46</sub> O <sub>11</sub> | C <sub>36</sub> H <sub>46</sub> NaO <sub>11</sub> | 92.5  |             | 677.2932 | 2.34       | 93.28      | 86.08       | 98.64         |

  

| Isotope | Abund Sum% | Calc Abund Sum% | m/z      | Calc m/z | Diff (ppm) |
|---------|------------|-----------------|----------|----------|------------|
| 1       | 70.12      | 65.89           | 677.2917 | 677.2932 | 2.22       |
| 2       | 23.63      | 26.28           | 678.2945 | 678.2966 | 3.15       |
| 3       | 5.34       | 6.59            | 679.2988 | 679.2995 | 1.05       |
| 4       | 0.91       | 1.24            | 680.3038 | 680.3022 | -2.3       |

# UV spectrum of Krishnolide C (**3**) in MeCN

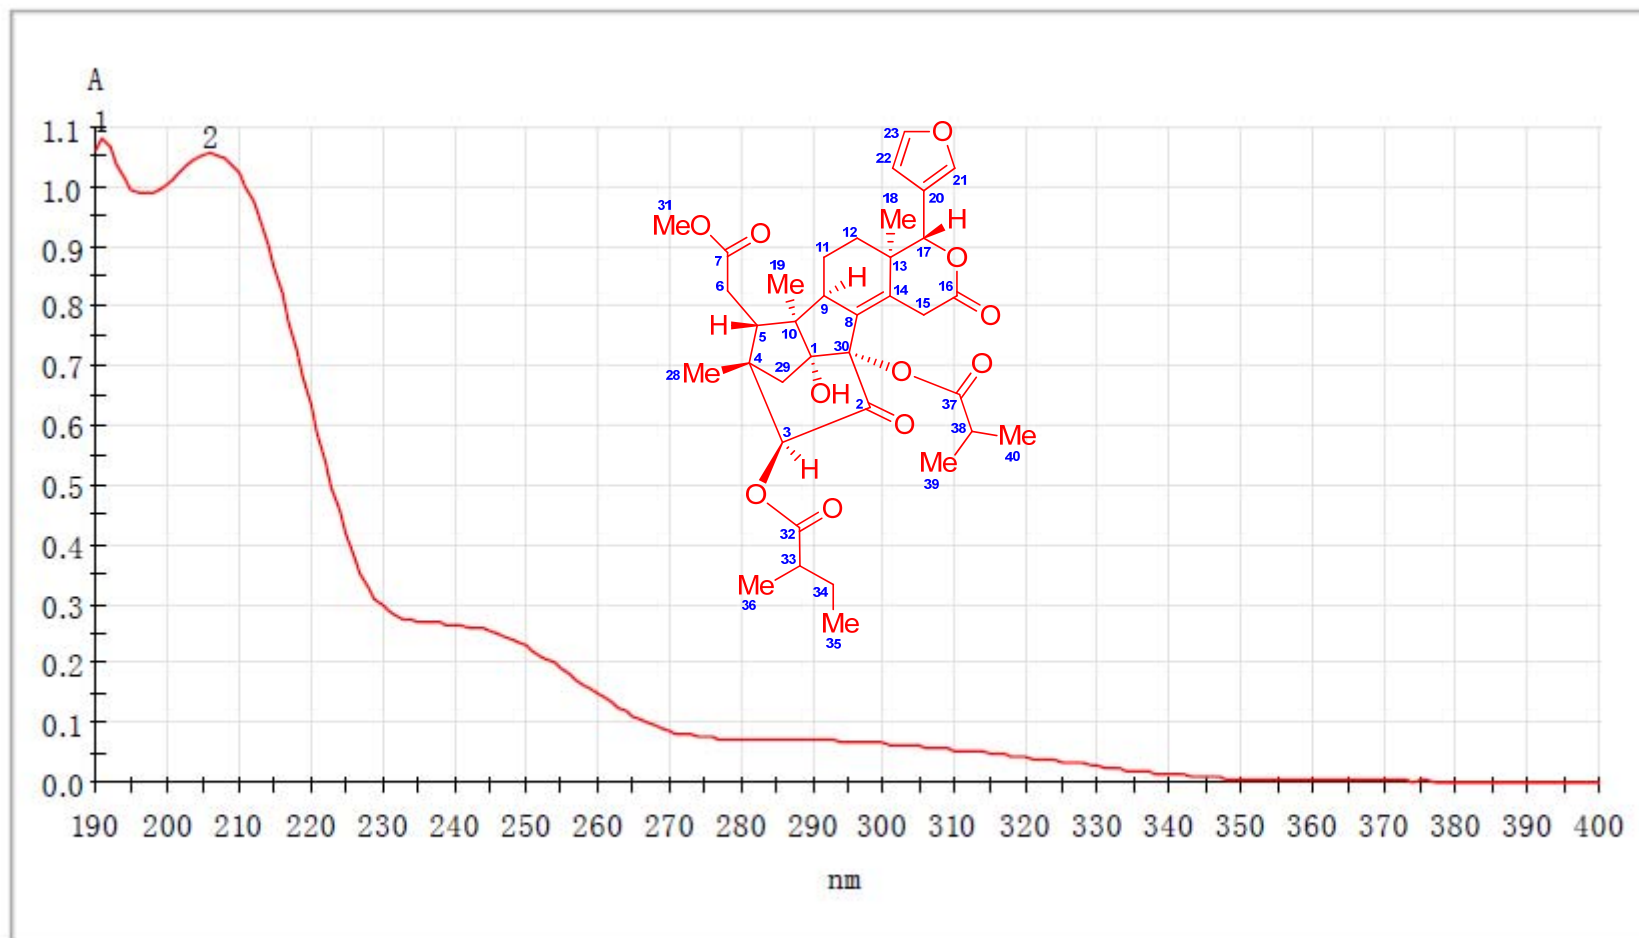

zq-26.dsp



<sup>1</sup>H NMR (400 MHz) spectrum of Krishnolide C (**3**) in CDCl<sub>3</sub>

7.476  
7.474  
7.429  
7.425  
7.421  
7.264  
6.426  
6.424  
5.218  
5.105  
3.712  
3.703  
3.656  
3.647  
3.639  
2.714  
2.696  
2.525  
2.491  
2.482  
2.459  
2.315  
2.173  
2.041  
2.010  
1.675  
1.592  
1.510  
1.500  
1.272  
1.254  
1.212  
1.194  
1.163  
1.146  
1.070  
1.048  
0.975  
0.930  
0.912  
0.893  
0.000

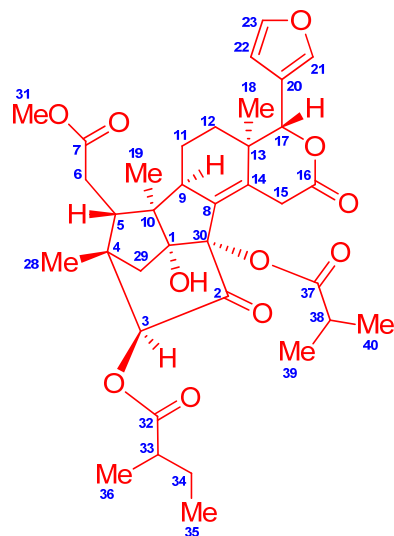

```

NAME          zq-26
EXPNO         1
PROCNO        1
Date_         20170629
Time          22.26
INSTRUM       spect
PROBHD        5 mm CPPBBO BB
PULPROG       zg30
TD            65536
SOLVENT       CDCl3
NS            16
DS            2
SWH           8223.685 Hz
FIDRES        0.125483 Hz
AQ            3.9846387 sec
RG            208.5
DW            60.800 usec
DE            10.00 usec
TE            297.0 K
D1            1.00000000 sec
TD0           1
    
```

```

===== CHANNEL f1 =====
SFO1          400.1324710 MHz
NUC1          1H
P1            11.50 usec
SI            65536
SF            400.1300083 MHz
WDW           EM
SSB           0
LB            0.30 Hz
GB            0
PC            1.00
    
```

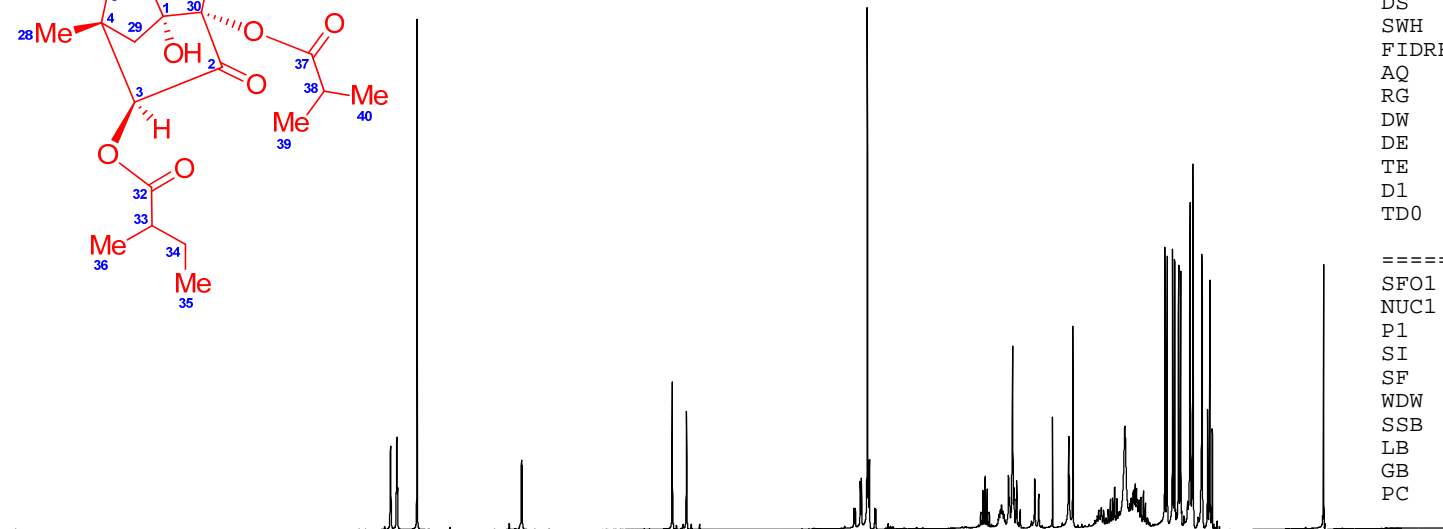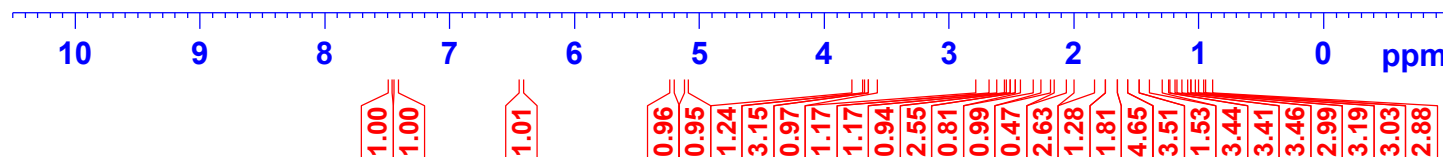

$^1\text{H}$  NMR (400 MHz) spectrum of Krishnolide C (**3**) in  $\text{CDCl}_3$

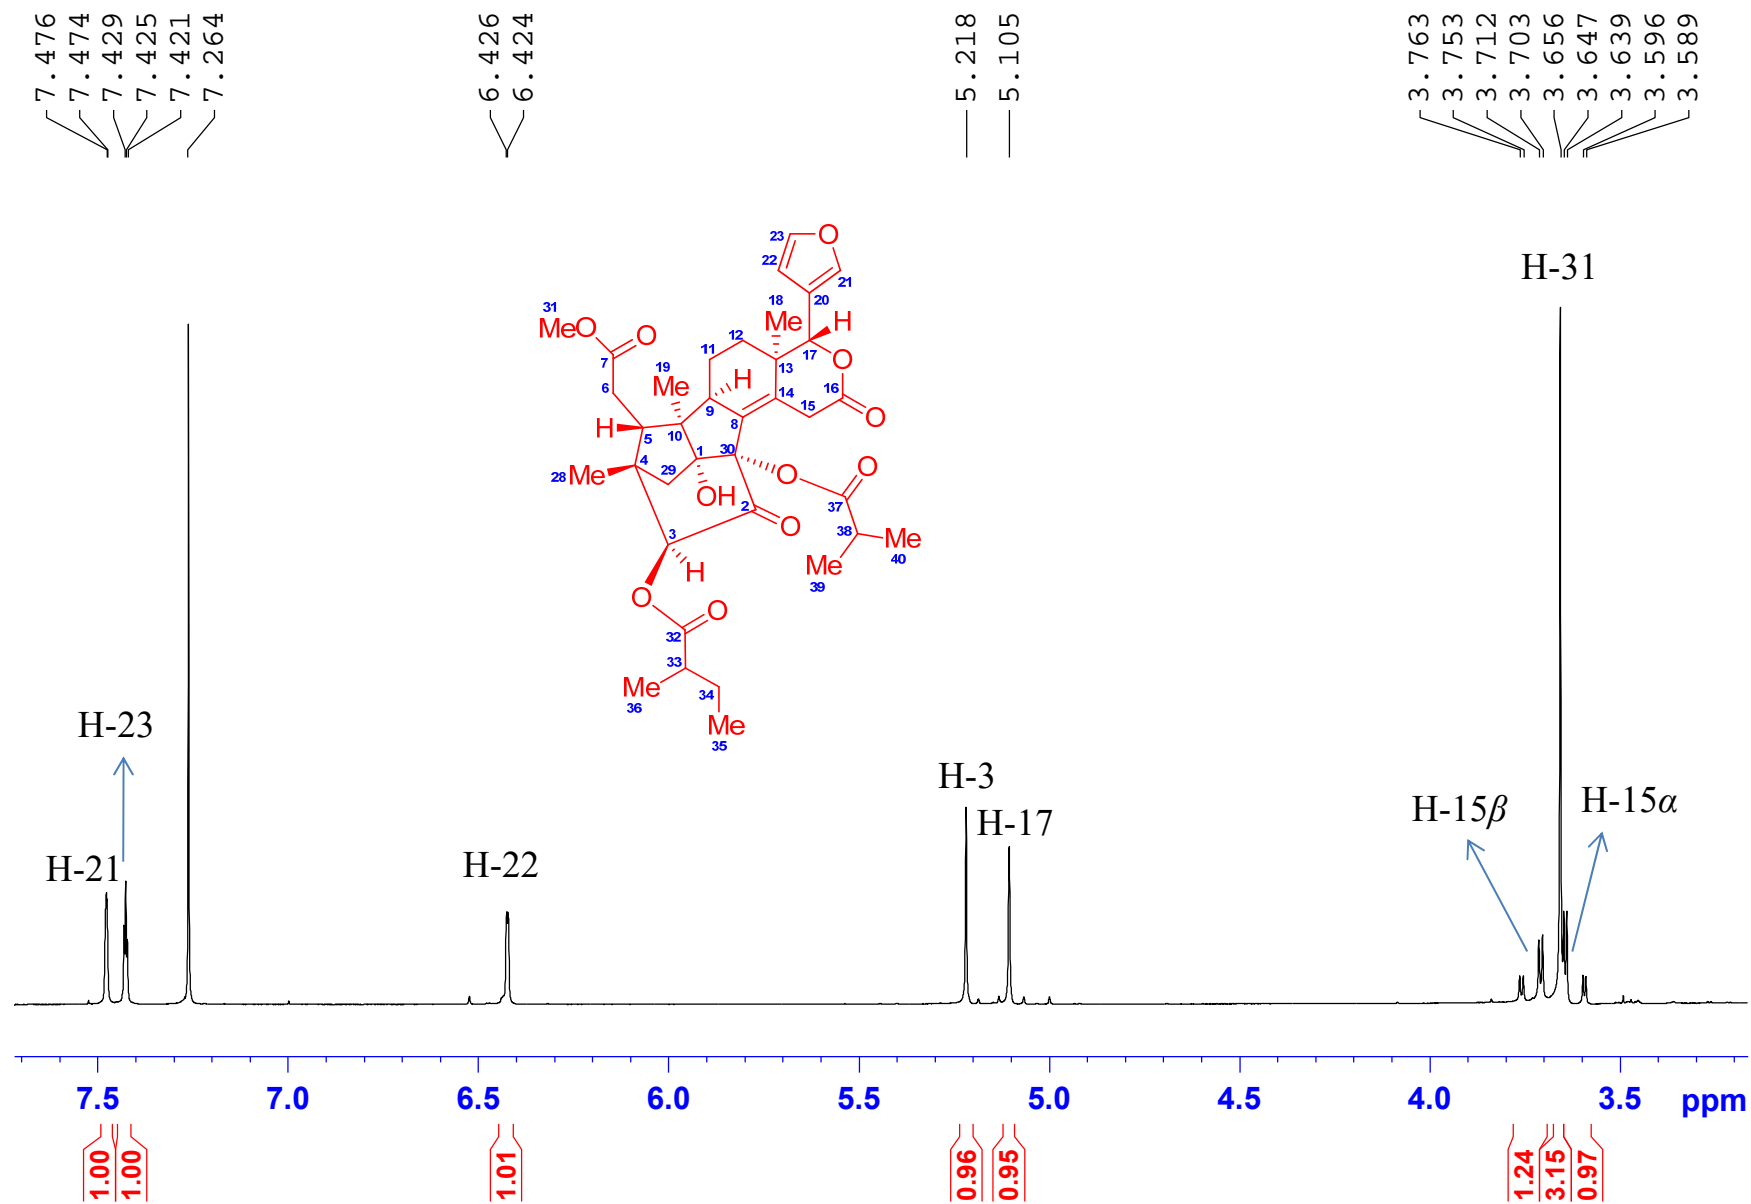

<sup>1</sup>H NMR (400 MHz) spectrum of Krishnolide C (**3**) in CDCl<sub>3</sub>

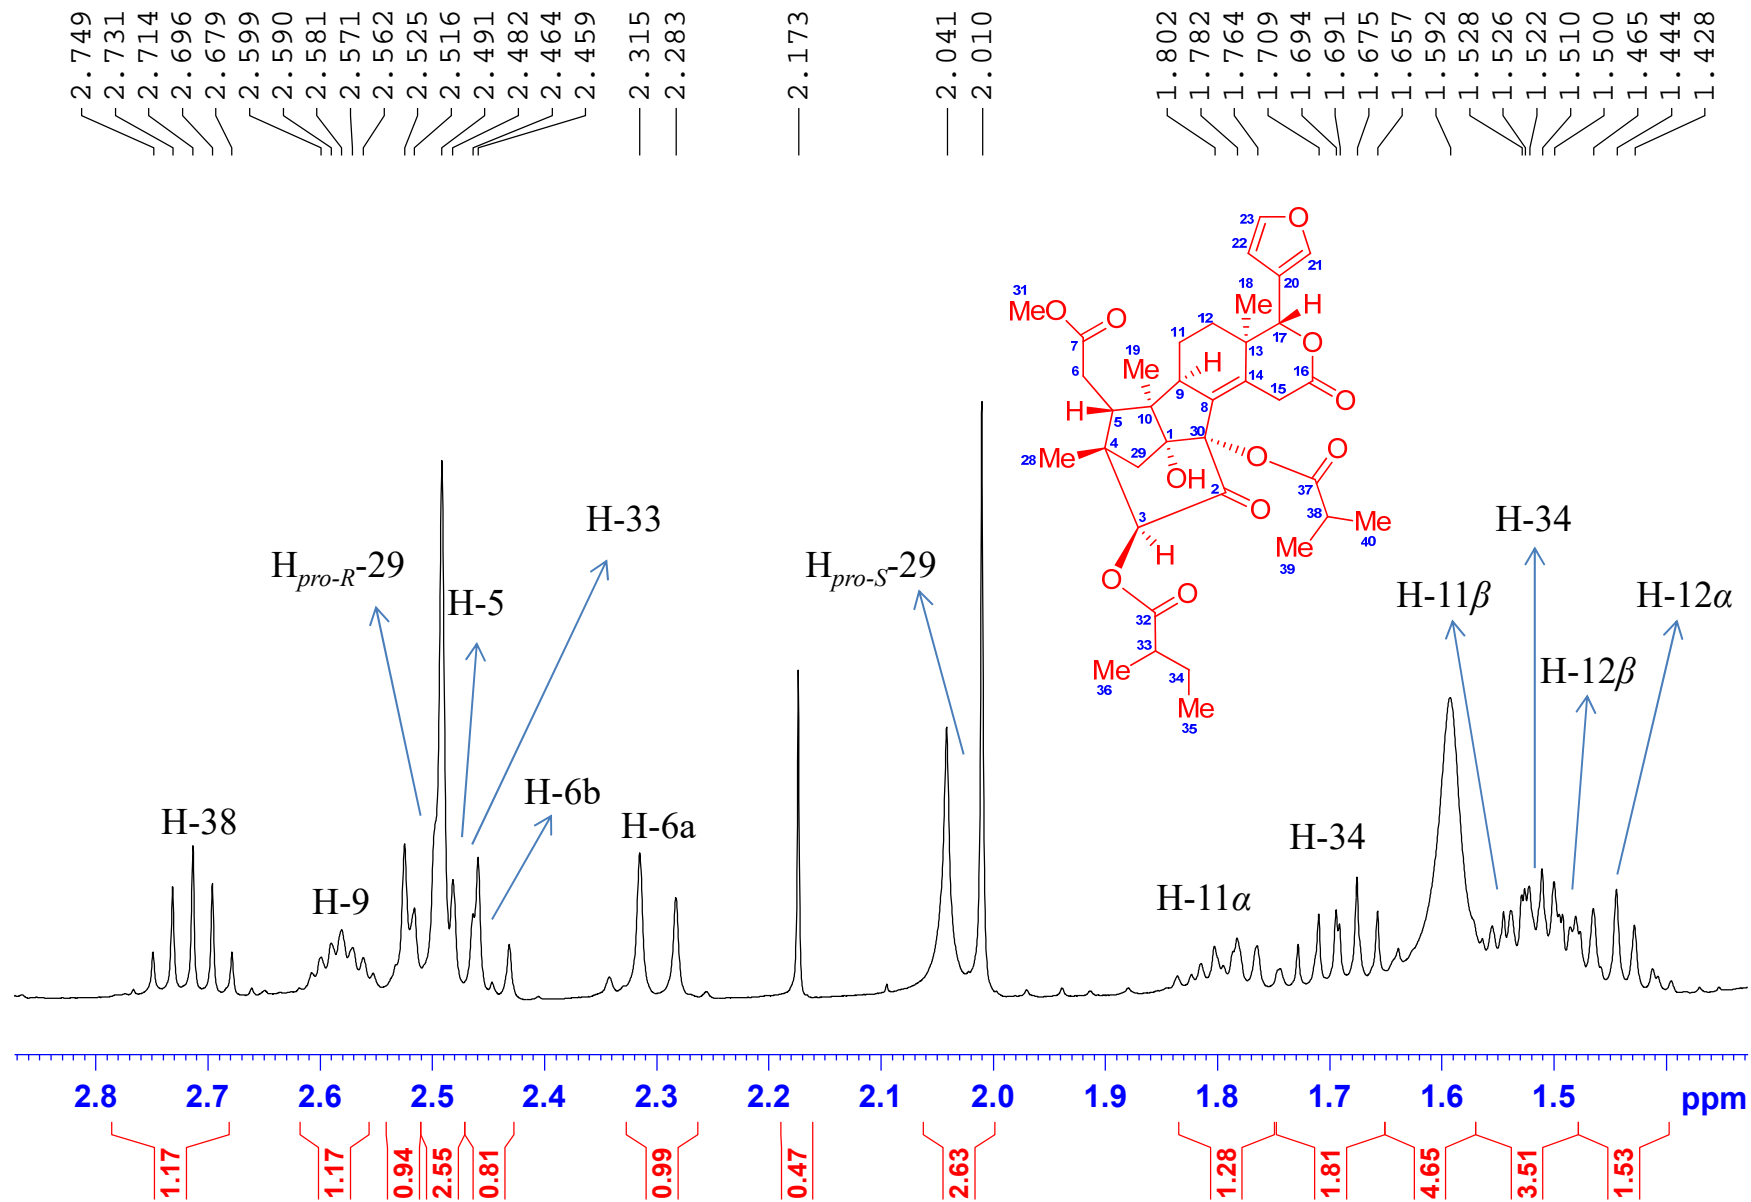

<sup>1</sup>H NMR (400 MHz) spectrum of Krishnolide C (**3**) in CDCl<sub>3</sub>

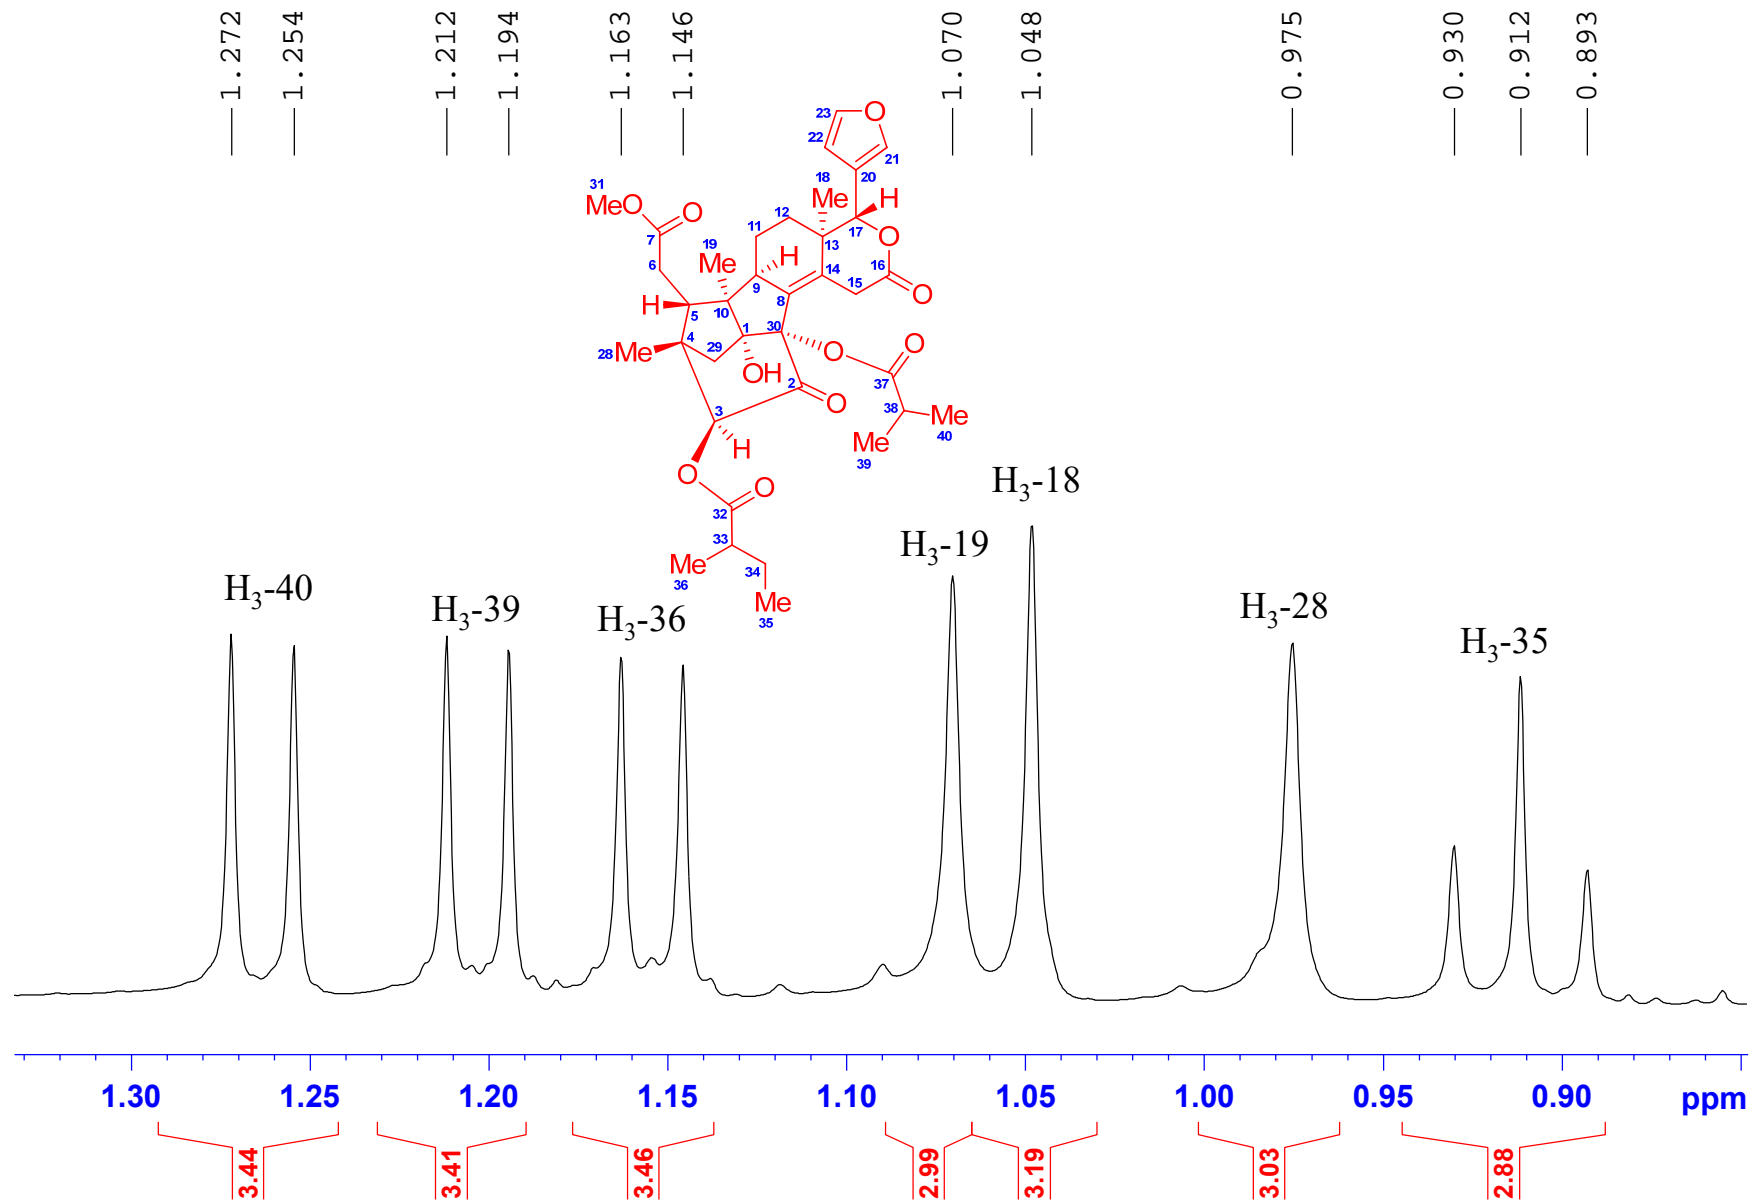

<sup>13</sup>C NMR (100 MHz) spectrum of Krishnolide C (3) in CDCl<sub>3</sub>

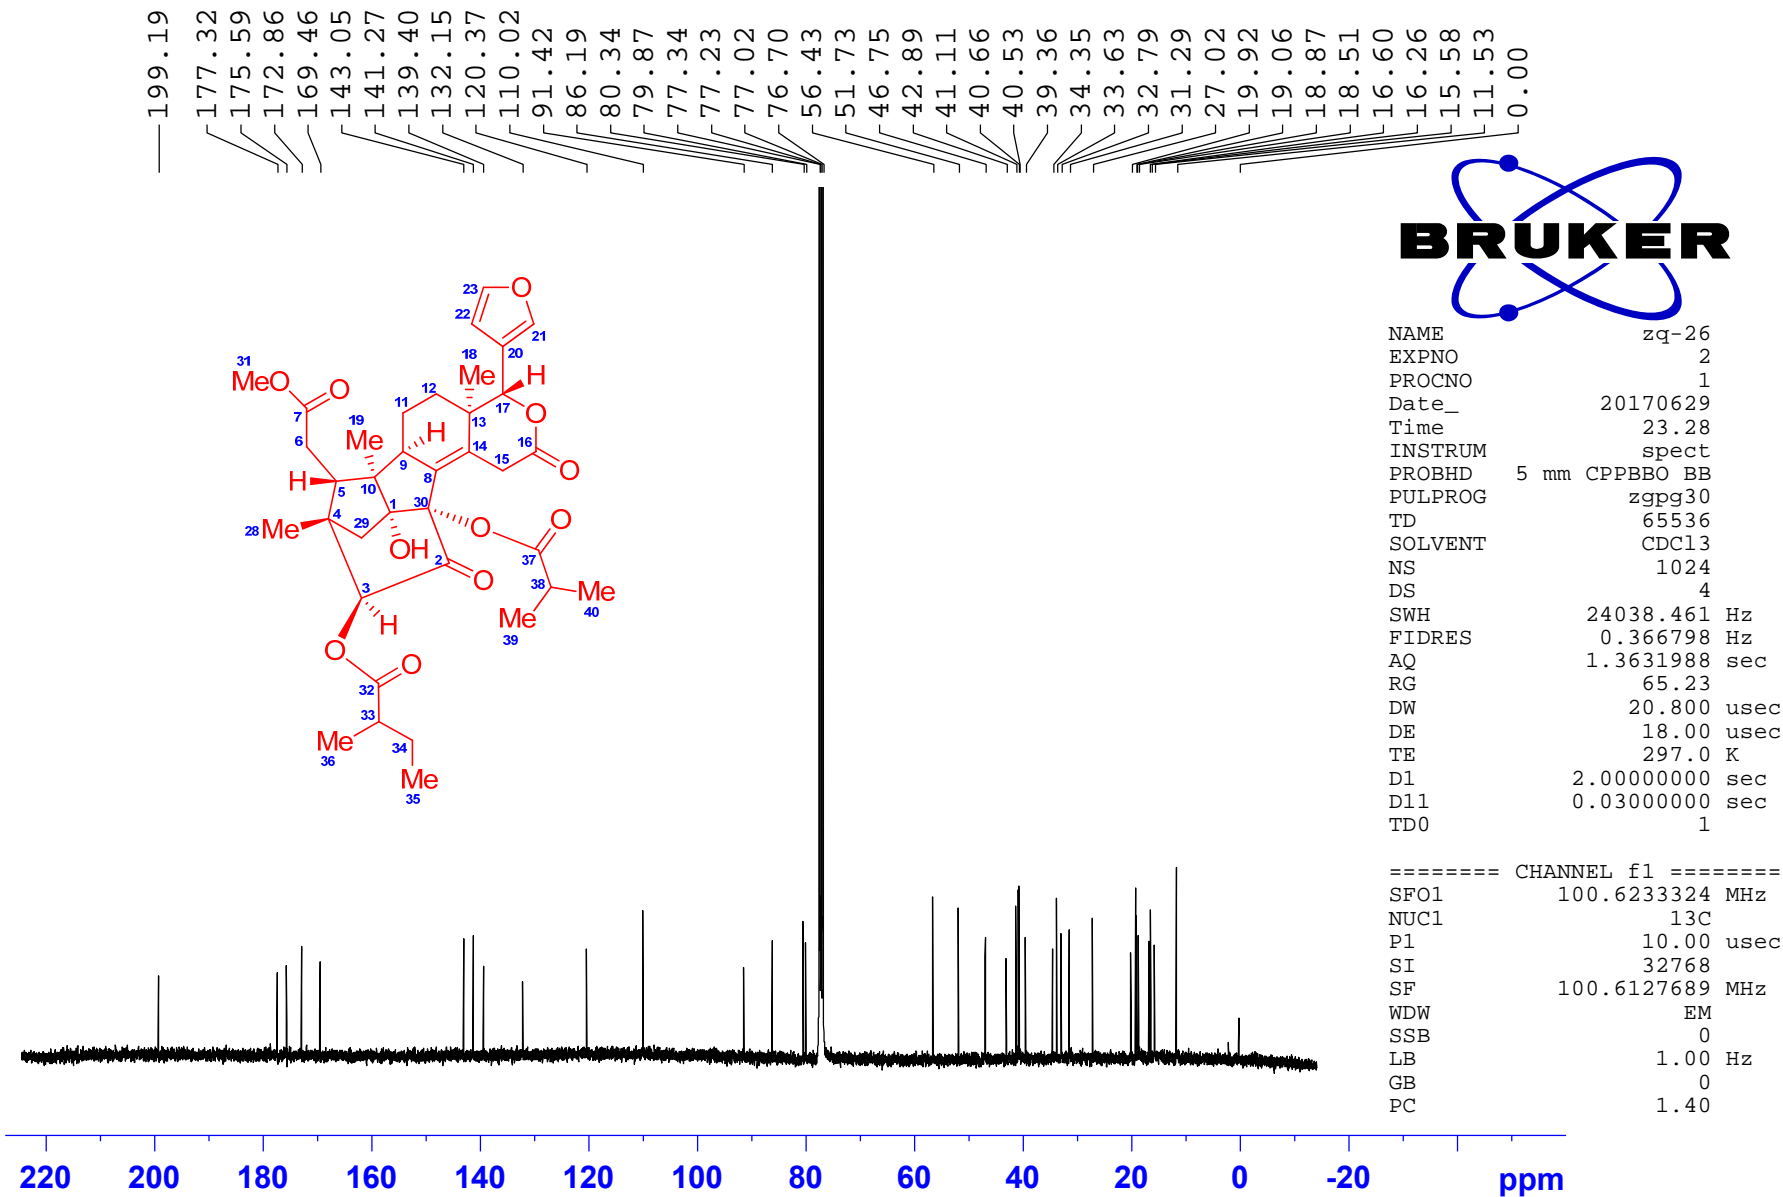

$^{13}\text{C}$  NMR (100 MHz) spectrum of Krishnolide C (**3**) in  $\text{CDCl}_3$

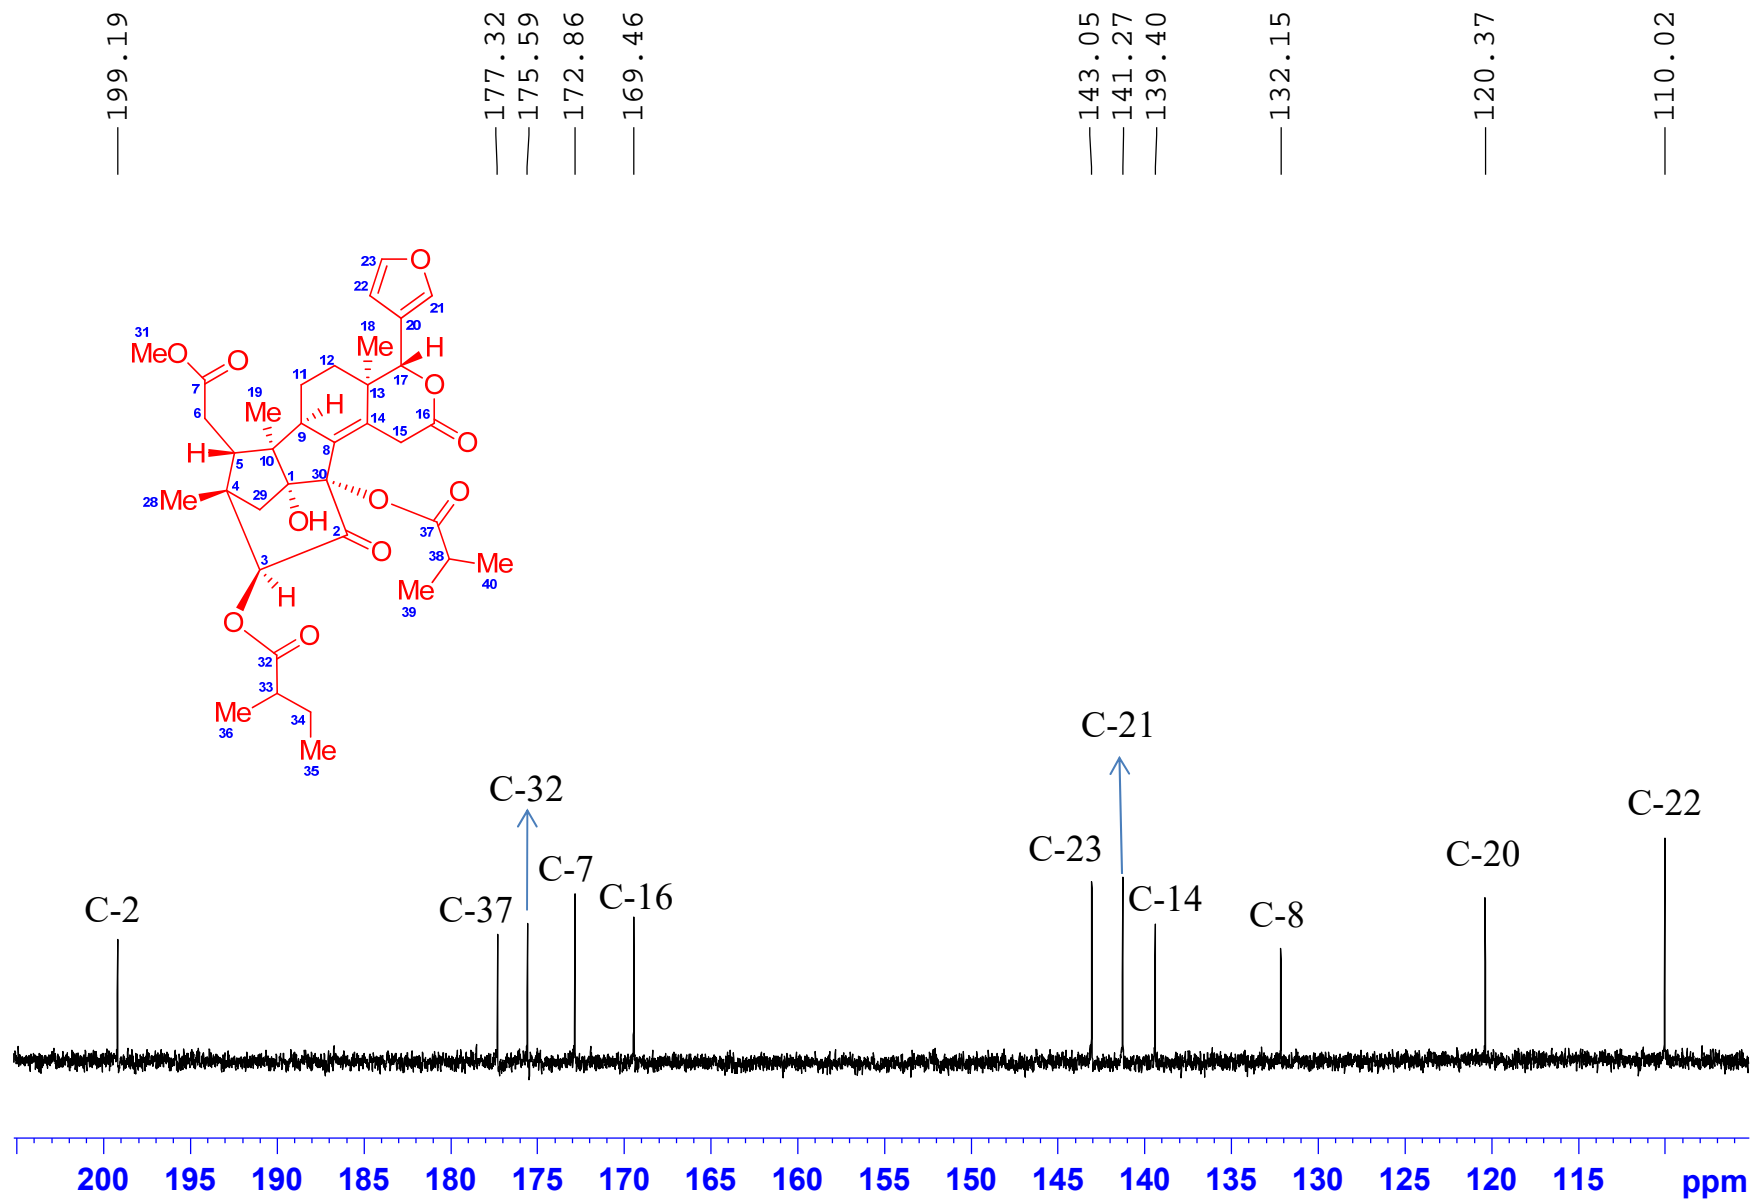

$^{13}\text{C}$  NMR (100 MHz) spectrum of Krishnolide C (**3**) in  $\text{CDCl}_3$

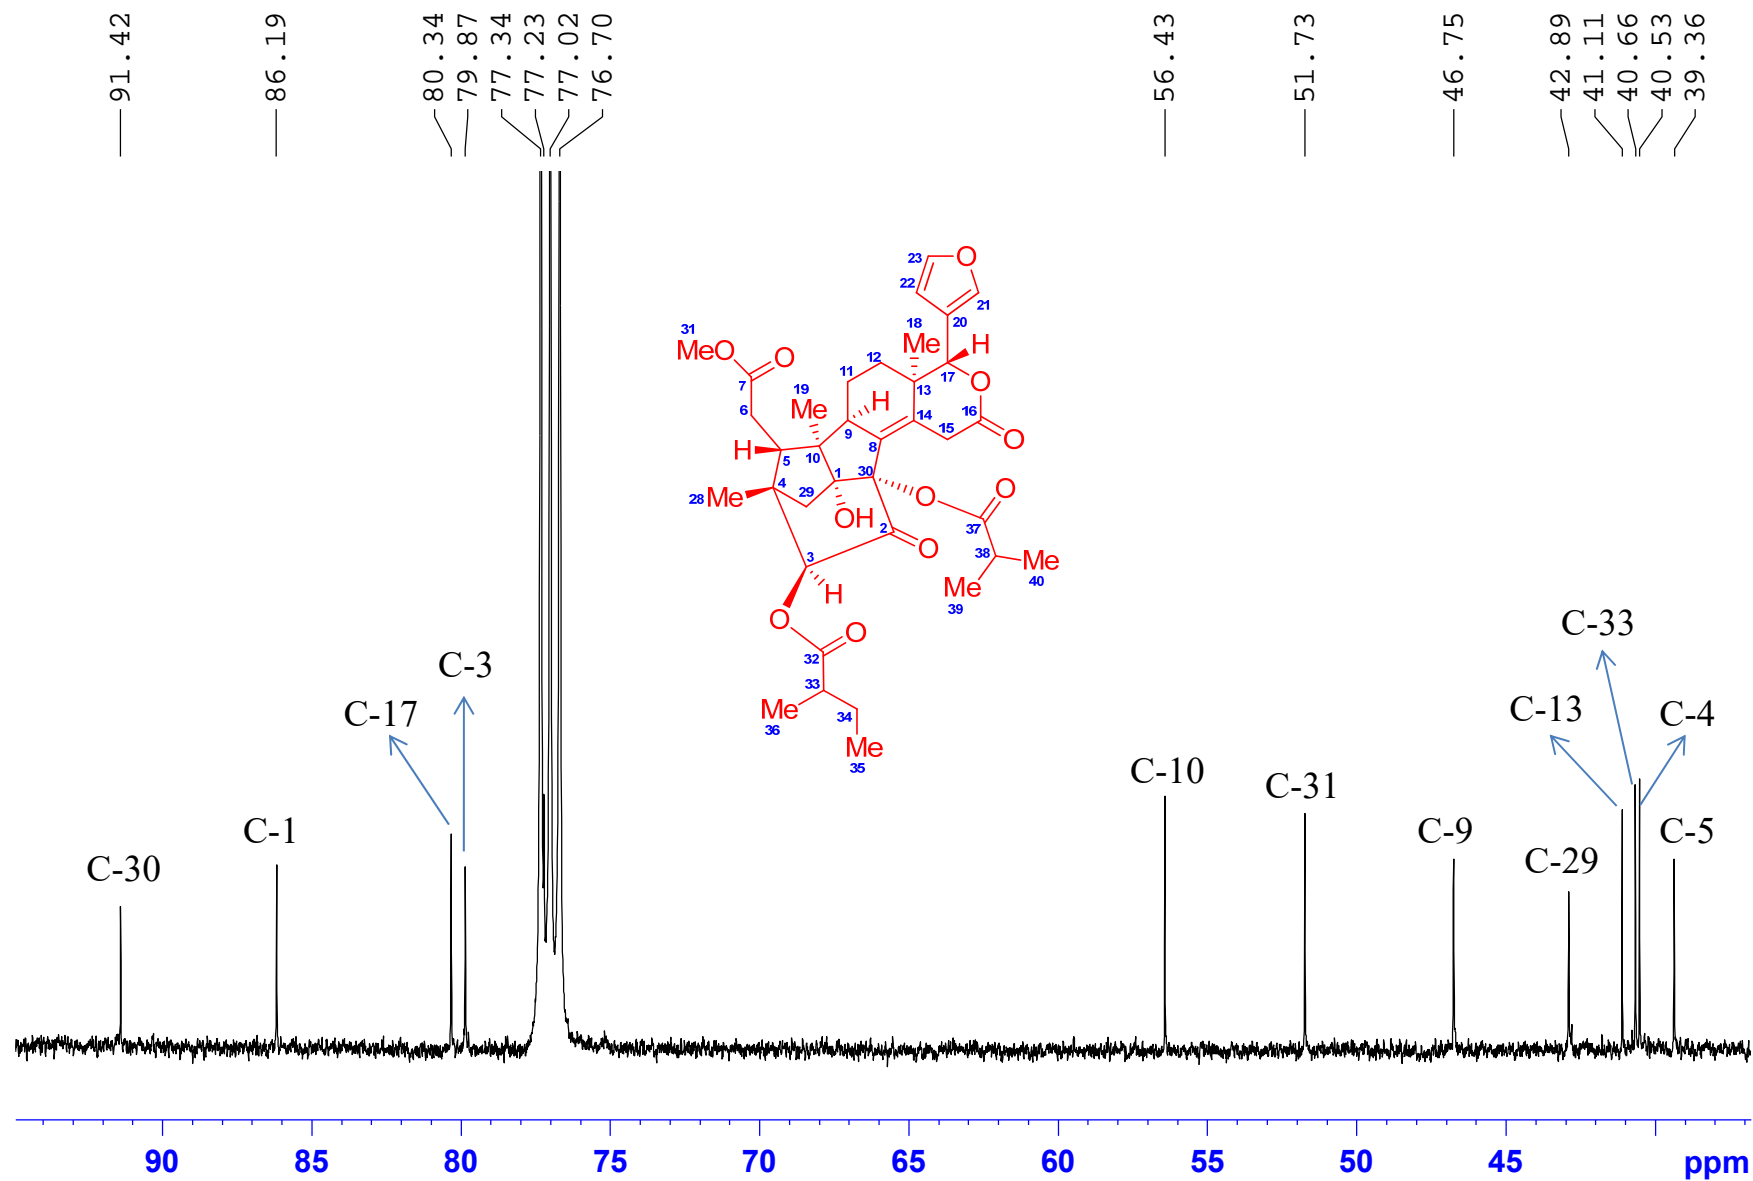

$^{13}\text{C}$  NMR (100 MHz) spectrum of Krishnolide C (**3**) in  $\text{CDCl}_3$

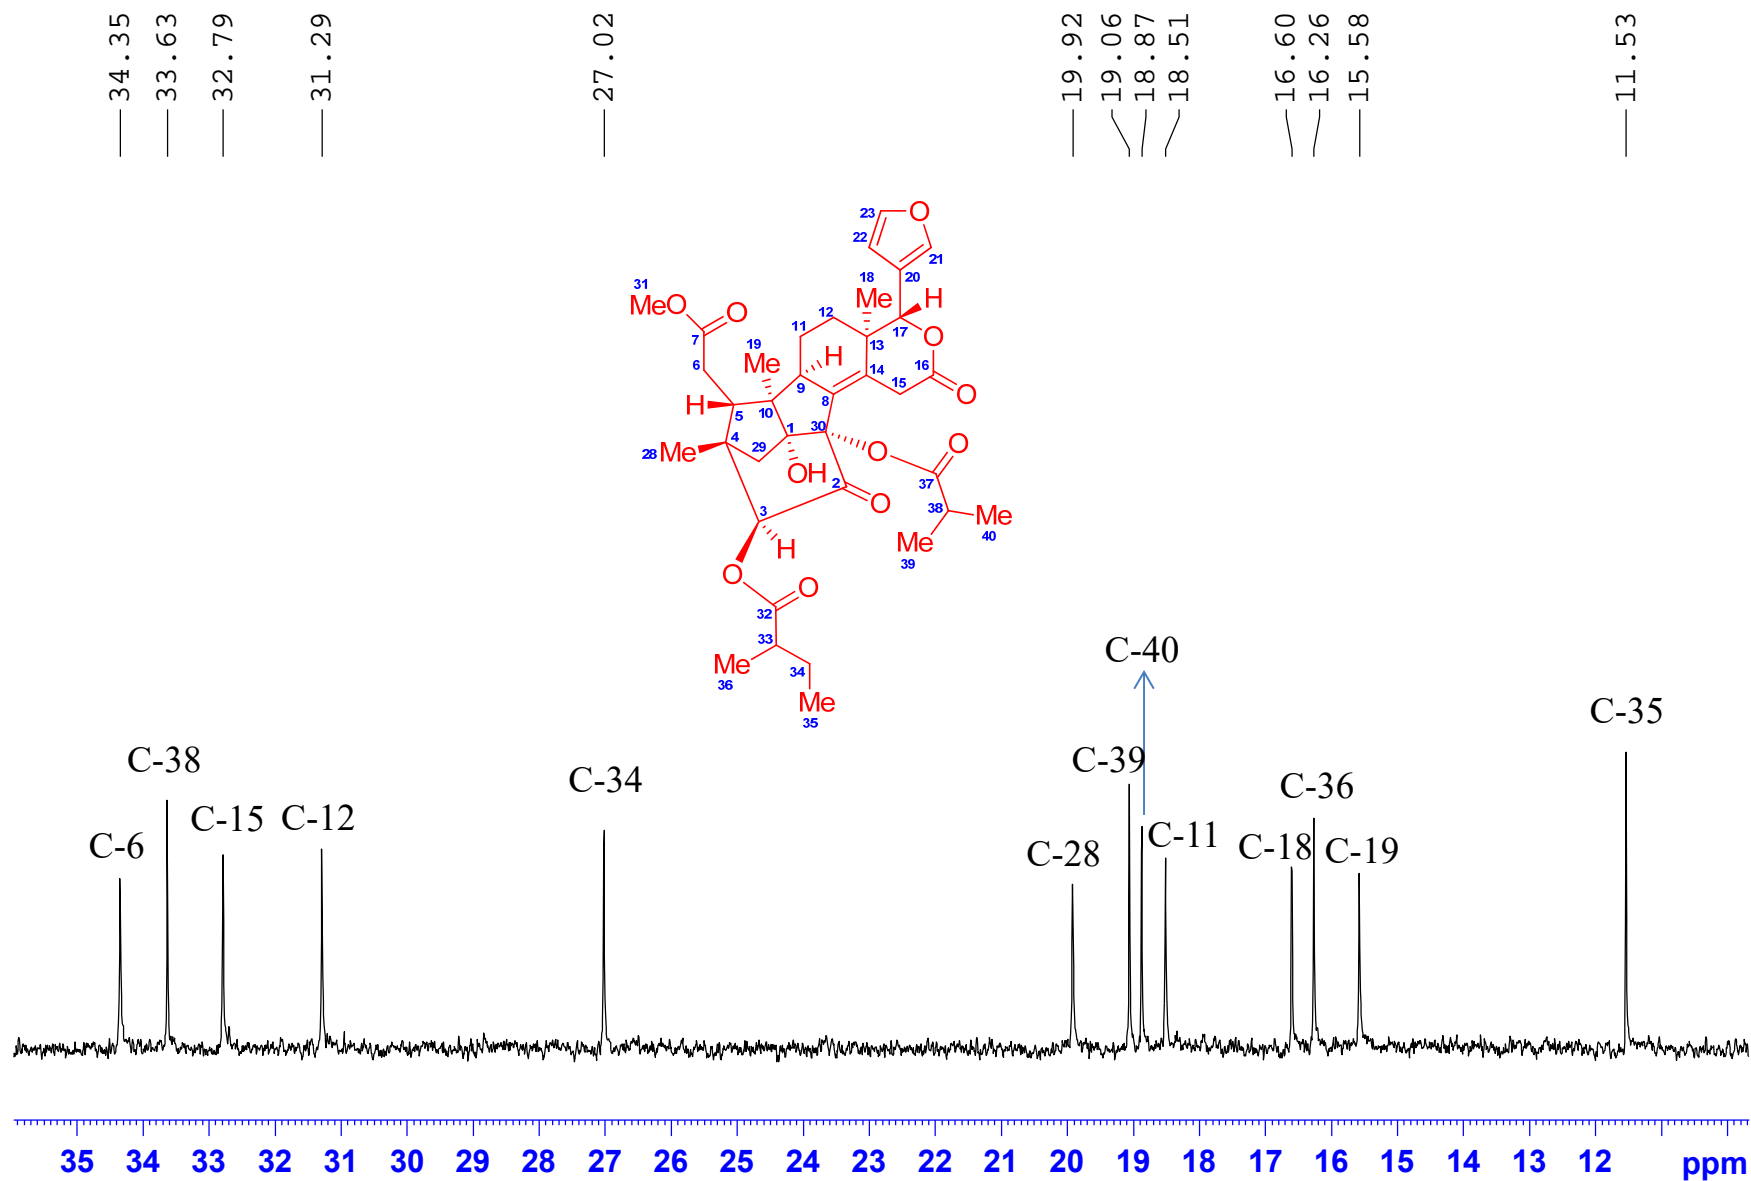



# DEPT 135 spectrum of Krishnolide C (3) in CDCl<sub>3</sub>

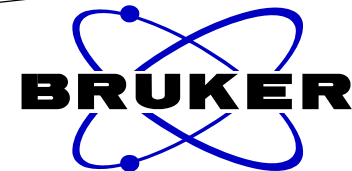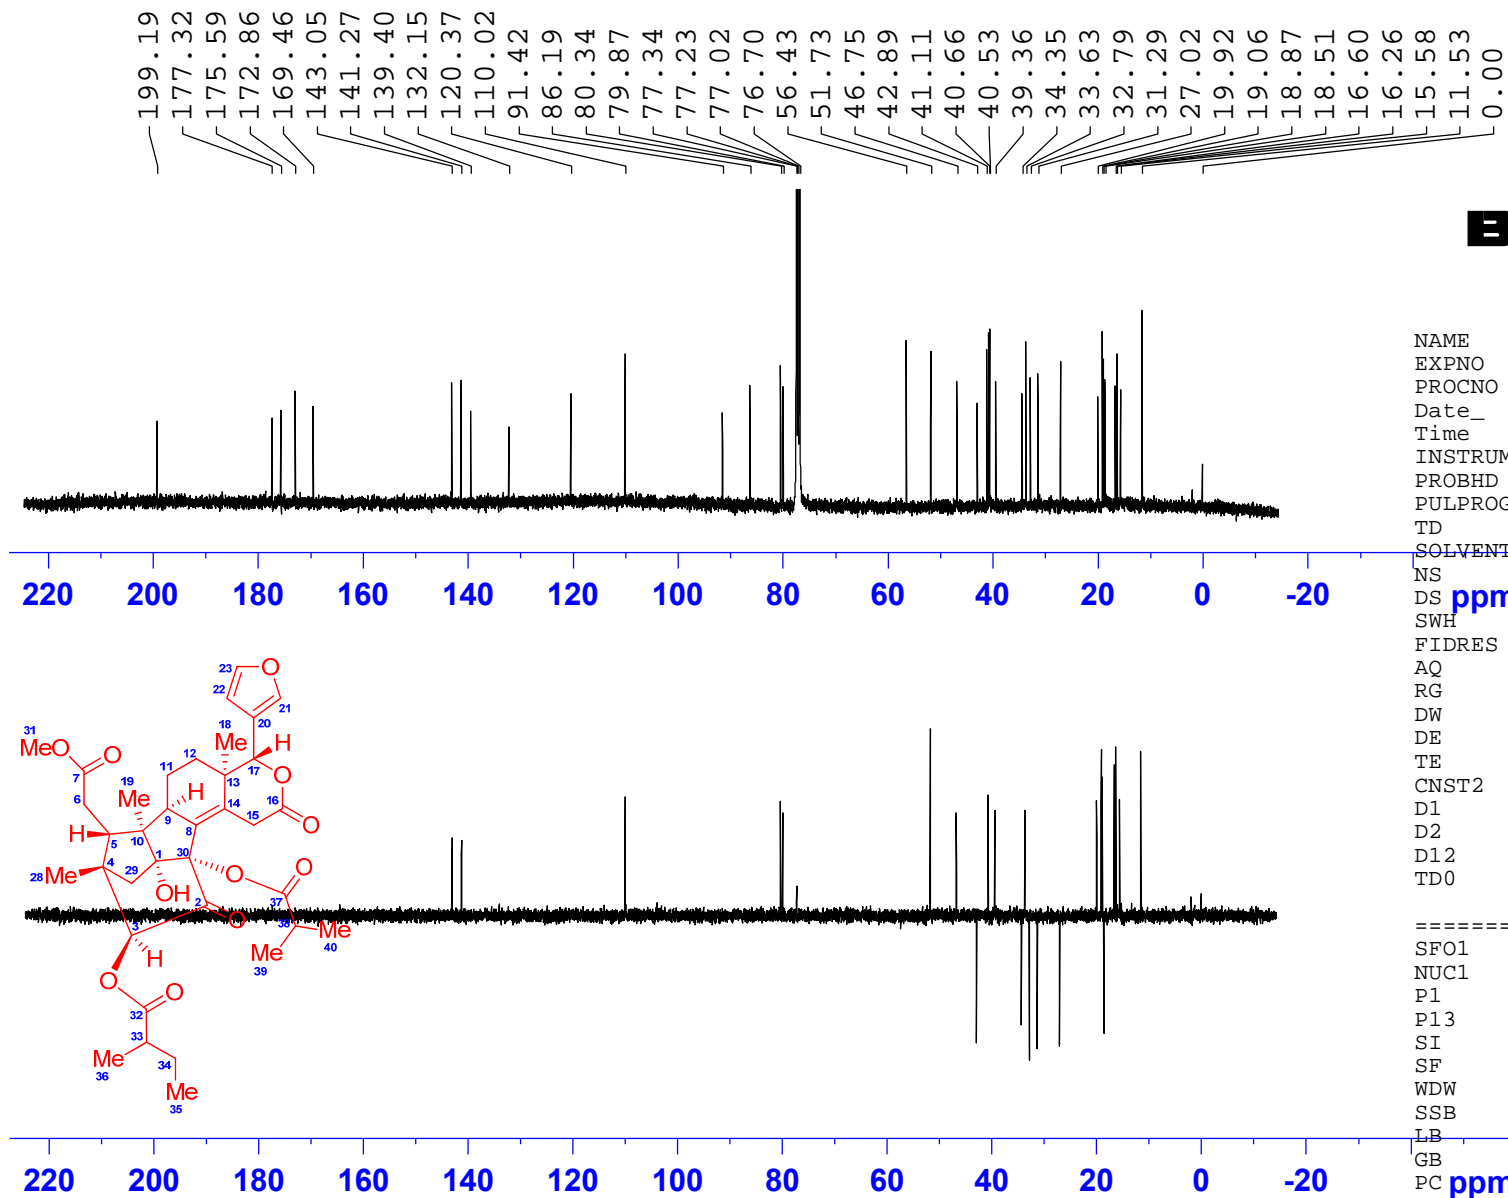

```

NAME          zq-26
EXPNO         3
PROCNO       1
Date_        20170629
Time         23.47
INSTRUM     spect
PROBHD      5 mm CPPBBO BB
PULPROG     deptsp135
TD          65536
SOLVENT     CDCl3
NS          300
DS          4
SWH         24038.461 Hz
FIDRES      0.366798 Hz
AQ          1.3631988 sec
RG          130.26
DW          20.800 usec
DE          18.00 usec
TE          297.0 K
CNST2       145.000000
D1          2.00000000 sec
D2          0.00344828 sec
D12         0.00002000 sec
TD0         1
    
```

```

===== CHANNEL f1 =====
SFO1       100.6233324 MHz
NUC1       13C
P1         10.00 usec
P13        2000.00 usec
SI         32768
SF         100.6127689 MHz
WDW        EM
SSB        0
LB         1.00 Hz
GB         0
PC         1.40
    
```

# DEPT 135 spectrum of Krishnolide C (**3**) in CDCl<sub>3</sub>

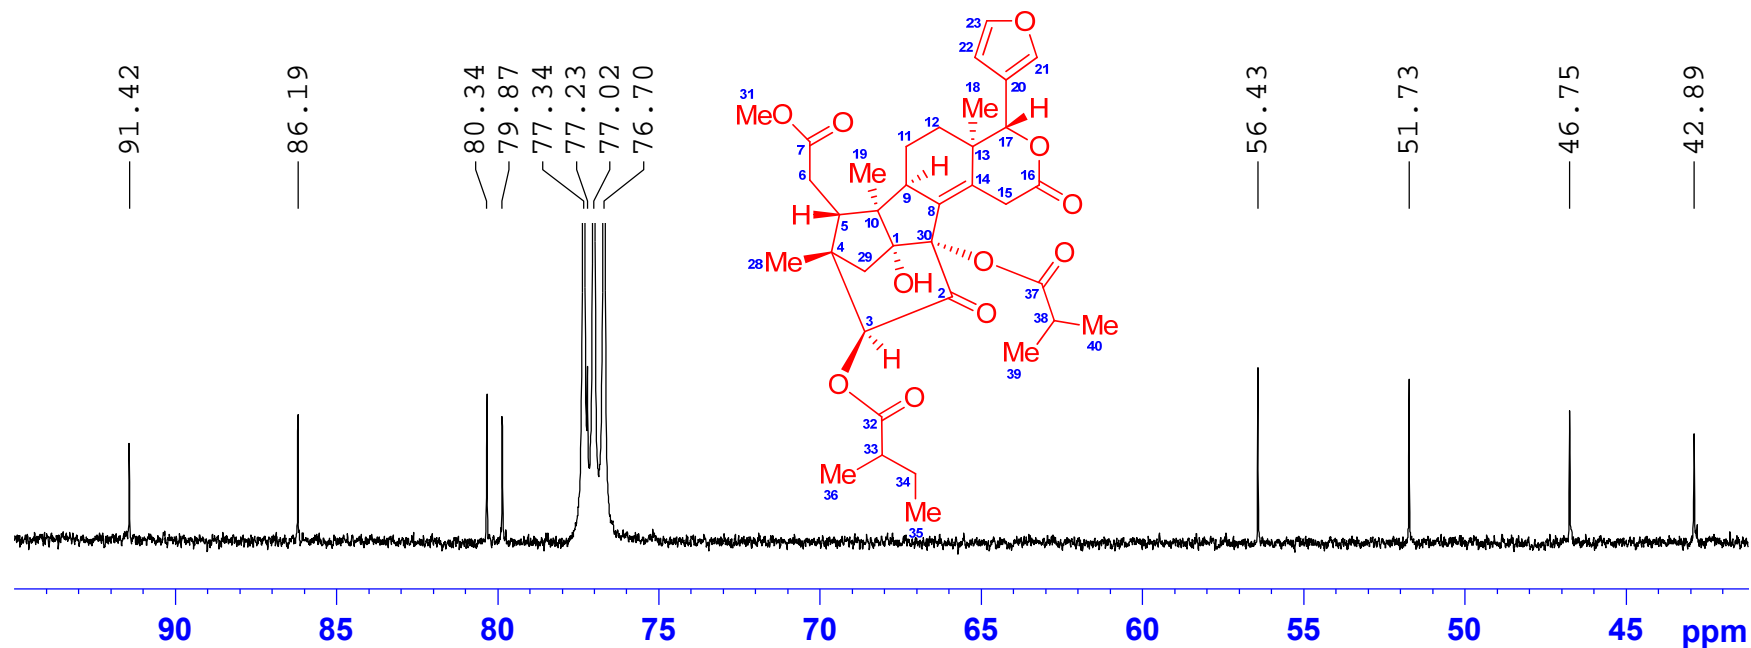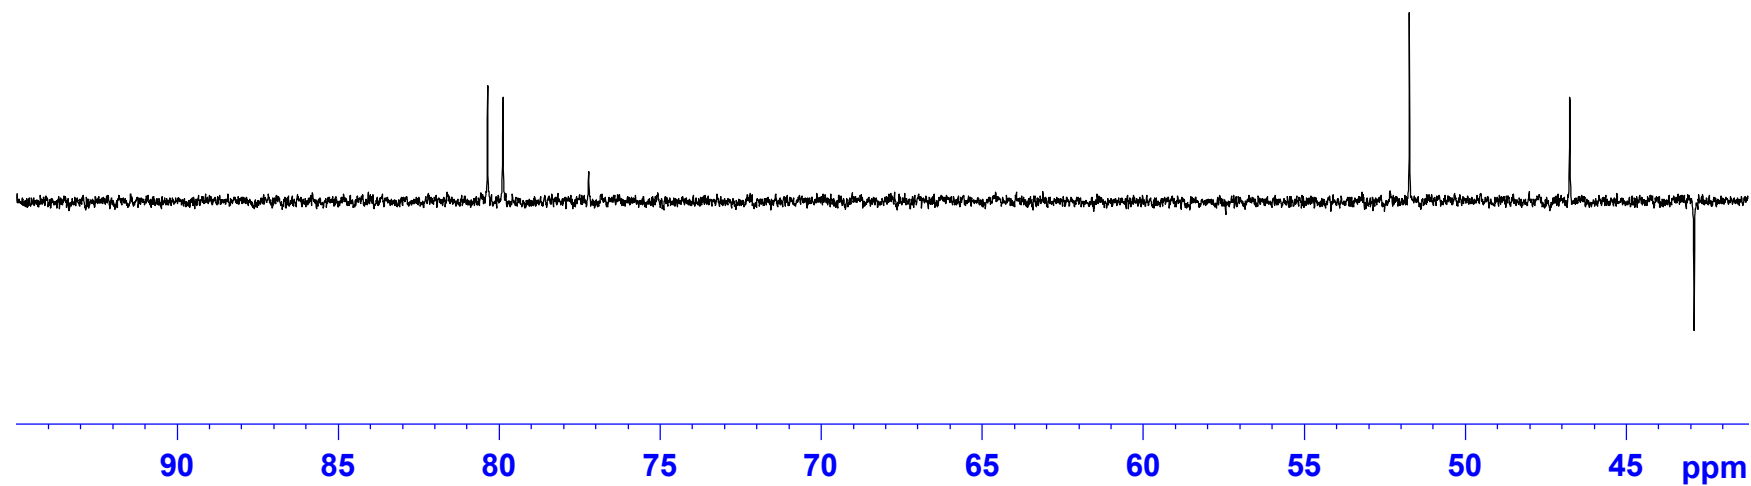

# DEPT 135 spectrum of Krishnolide C (3) in CDCl<sub>3</sub>

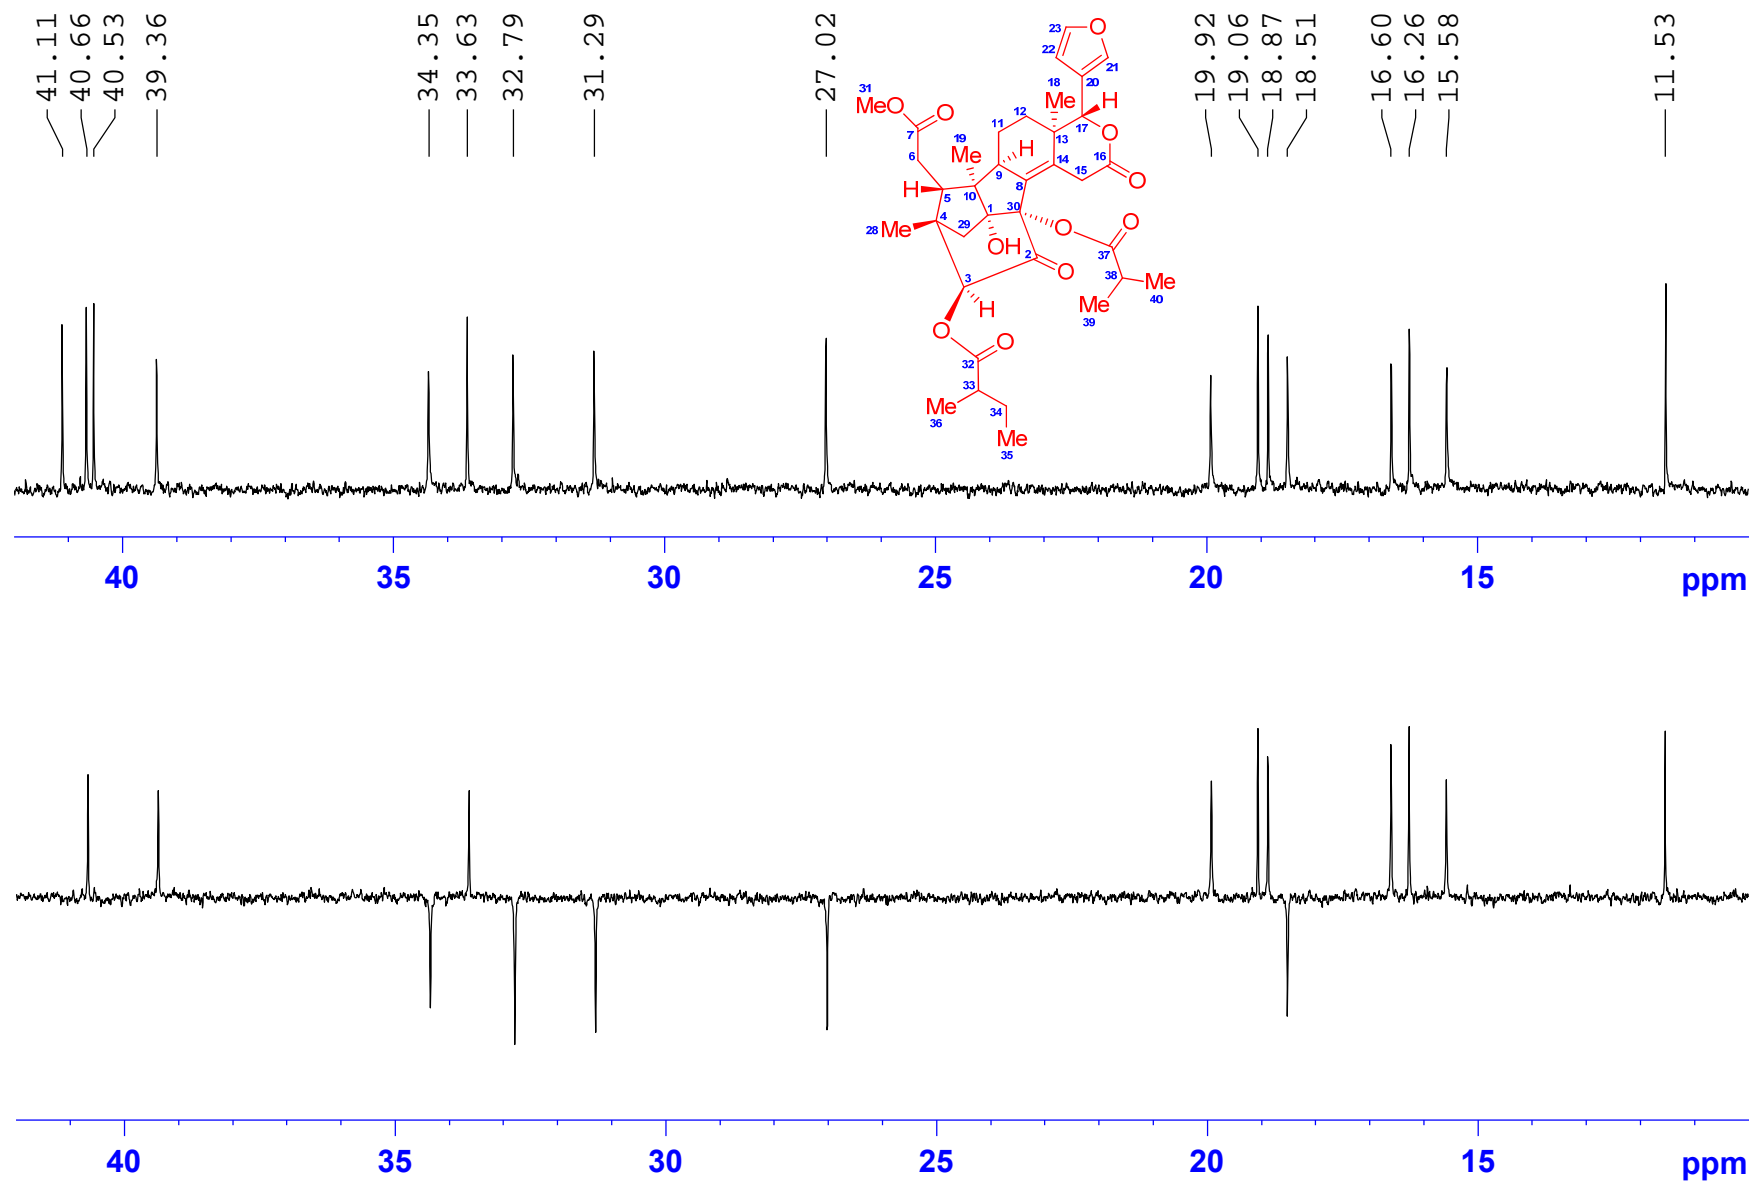

# $^1\text{H}$ - $^1\text{H}$ COSY spectrum of Krishnolide C (3) in $\text{CDCl}_3$

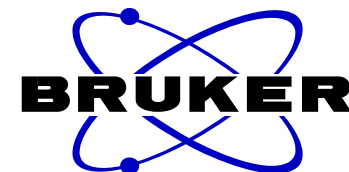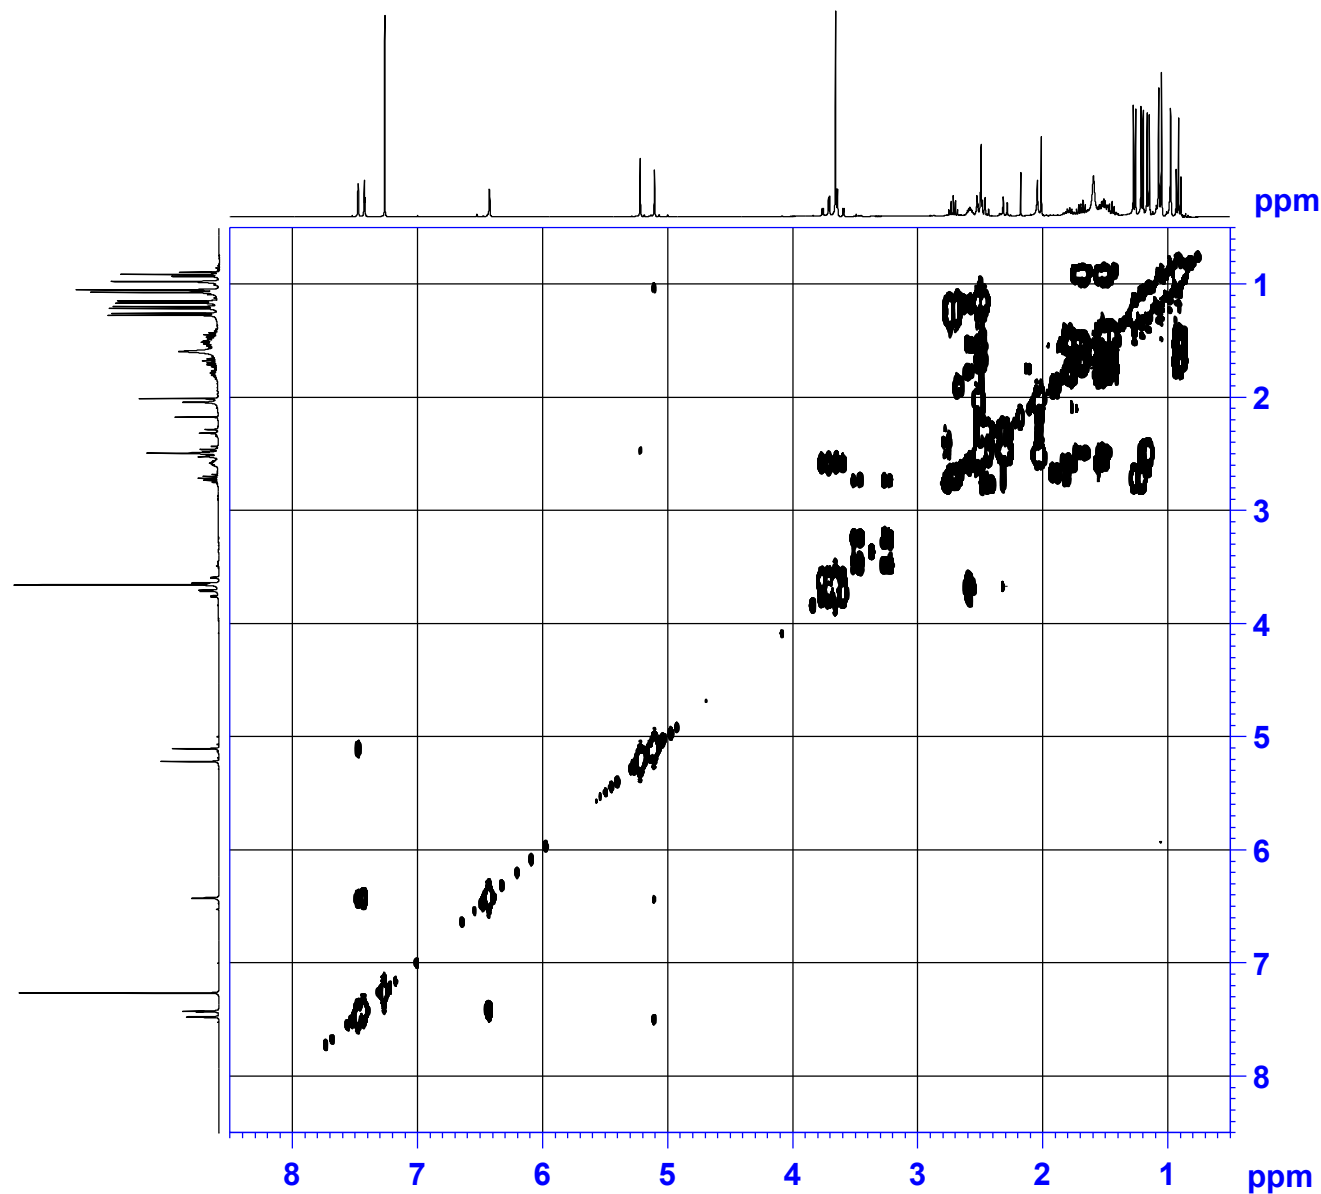

```

NAME          zq-26
EXPNO         4
PROCNO        1
Date_         20170707
Time          4.58
INSTRUM       spect
PROBHD        5 mm CPPBBO BB
PULPROG       cosygpppqf
TD            2048
SOLVENT       CDCl3
NS            8
DS            8
SWH           3906.250 Hz
FIDRES        1.907349 Hz
AQ            0.2621940 sec
RG            208.5
DW            128.000 usec
DE            10.00 usec
TE            297.0 K
D0            0.00000300 sec
D1            1.89678097 sec
D11           0.03000000 sec
D12           0.00002000 sec
D13           0.00000400 sec
D16           0.00020000 sec
IN0           0.00025600 sec
    
```

```

===== CHANNEL f1 =====
SF01          400.1318006 MHz
NUC1          1H
P0            11.50 usec
P1            11.50 usec
P17           2500.00 usec
ND0           1
TD            128
SF01          400.1318 MHz
FIDRES        30.517578 Hz
SW            9.762 ppm
FnMODE        QF
SI            1024
SF            400.1300063 MHz
WDW           QSINE
SSB           0
LB            0.00 Hz
GB            0
PC            1.40
SI            1024
MC2           QF
SF            400.1300063 MHz
WDW           QSINE
SSB           0
LB            0.00 Hz
GB            0
    
```

$^1\text{H}$ - $^1\text{H}$  COSY spectrum of Krishnolide C (**3**) in  $\text{CDCl}_3$

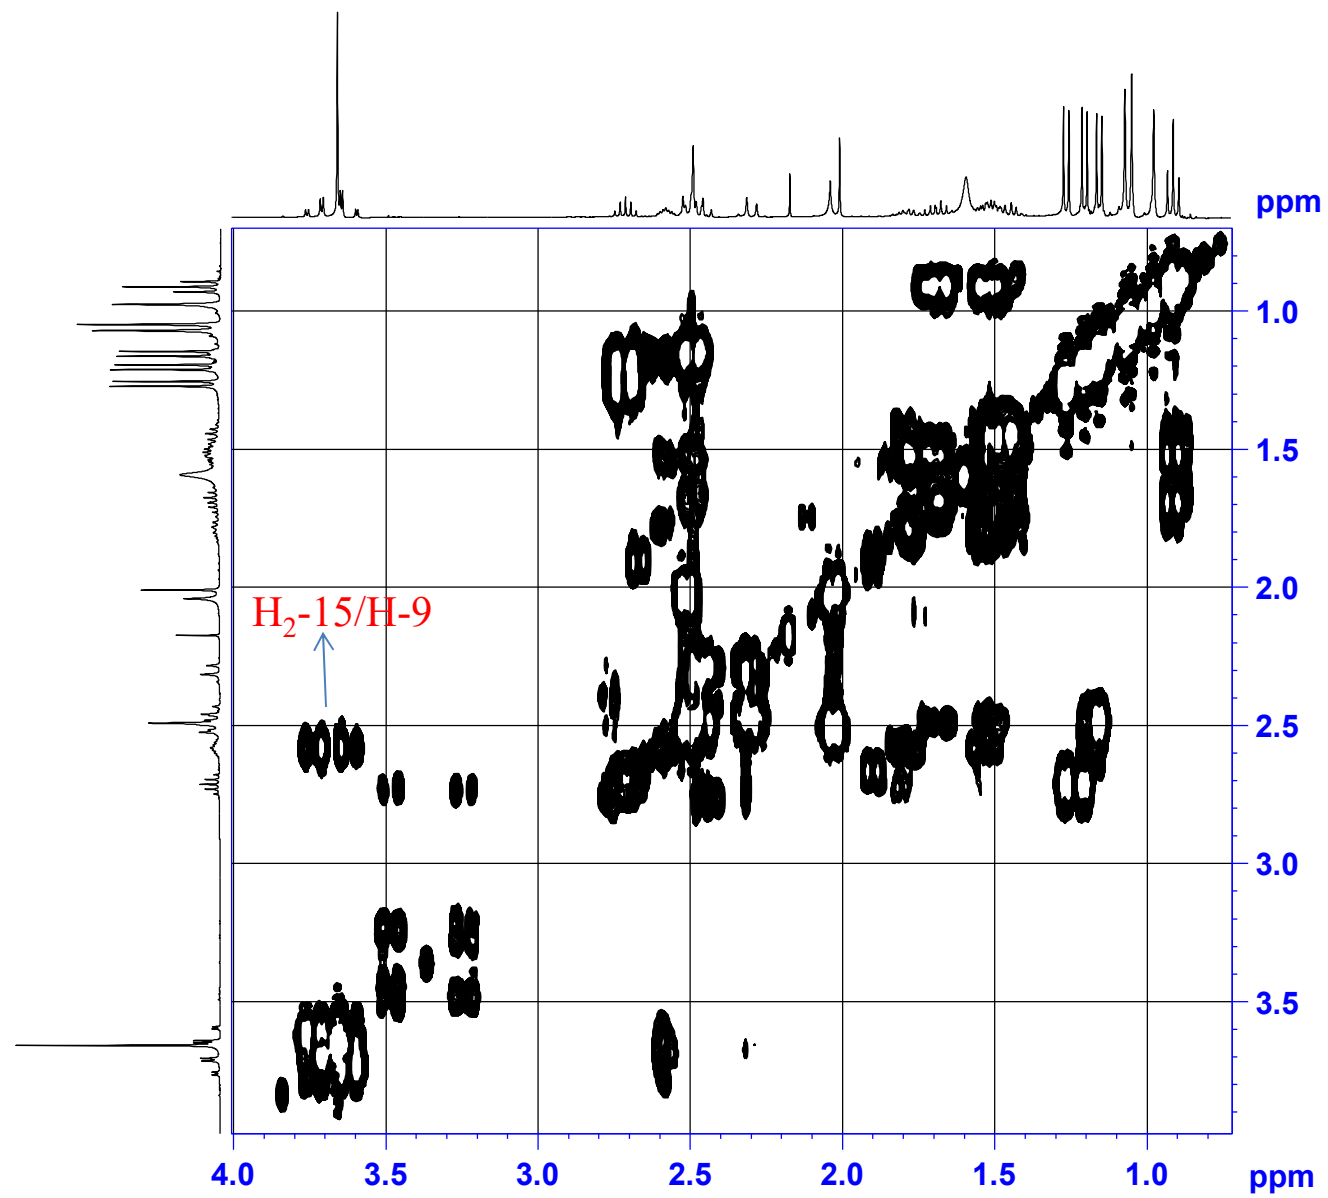

$^1\text{H}$ - $^1\text{H}$  COSY spectrum of Krishnolide C (**3**) in  $\text{CDCl}_3$

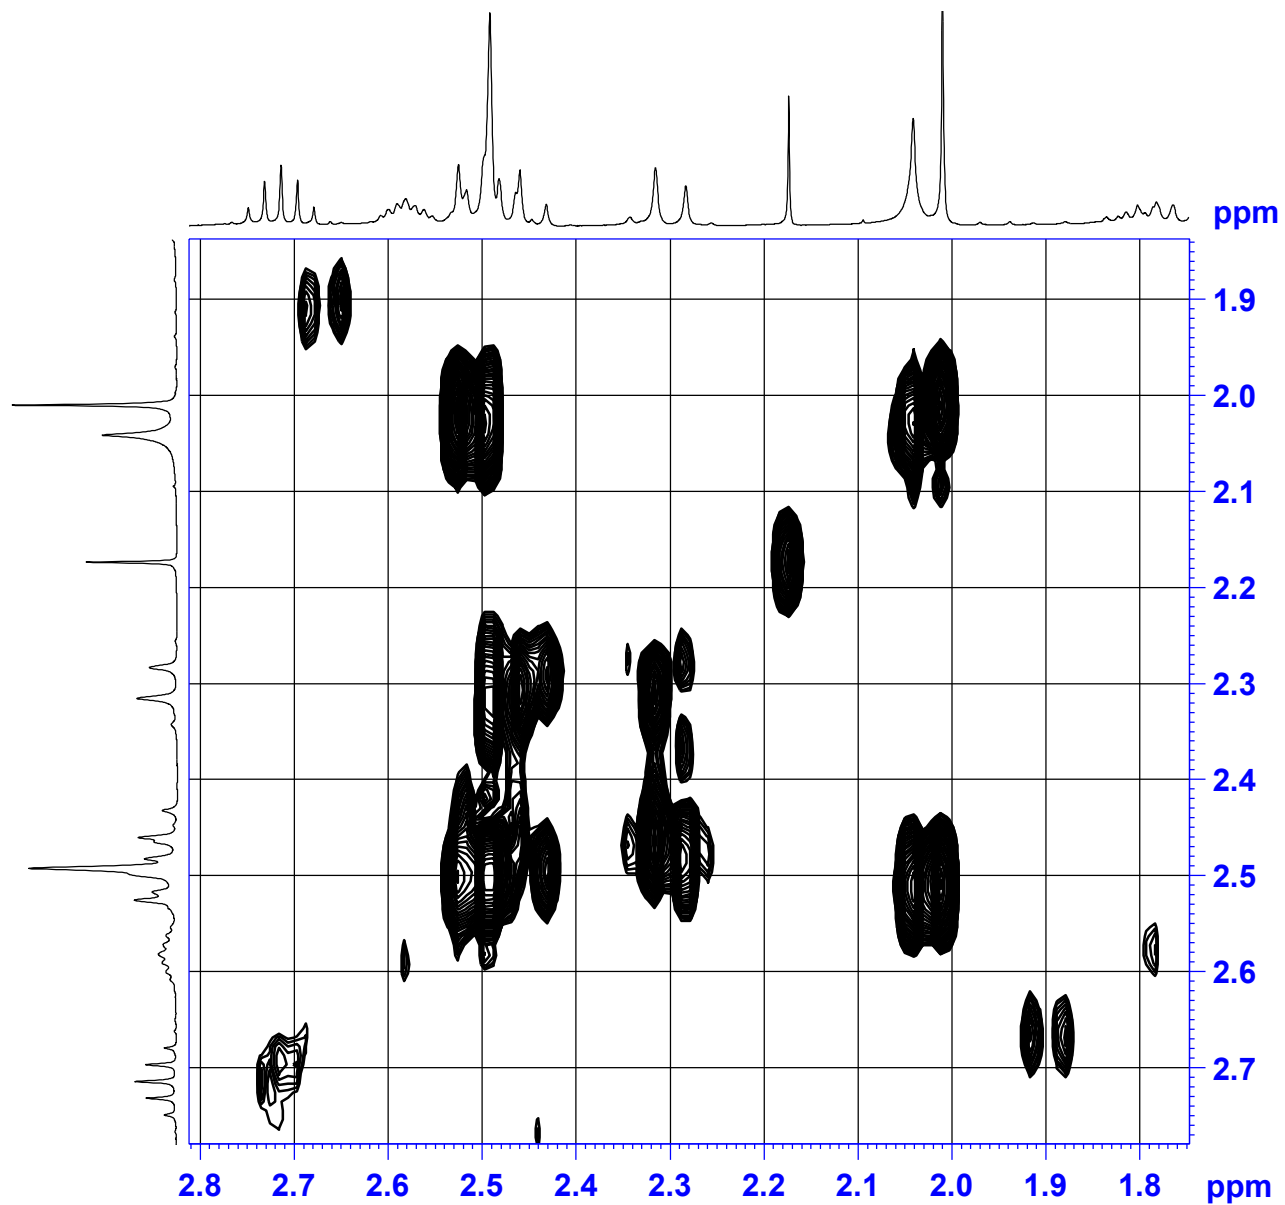

$^1\text{H}$ - $^1\text{H}$  COSY spectrum of Krishnolide C (**3**) in  $\text{CDCl}_3$

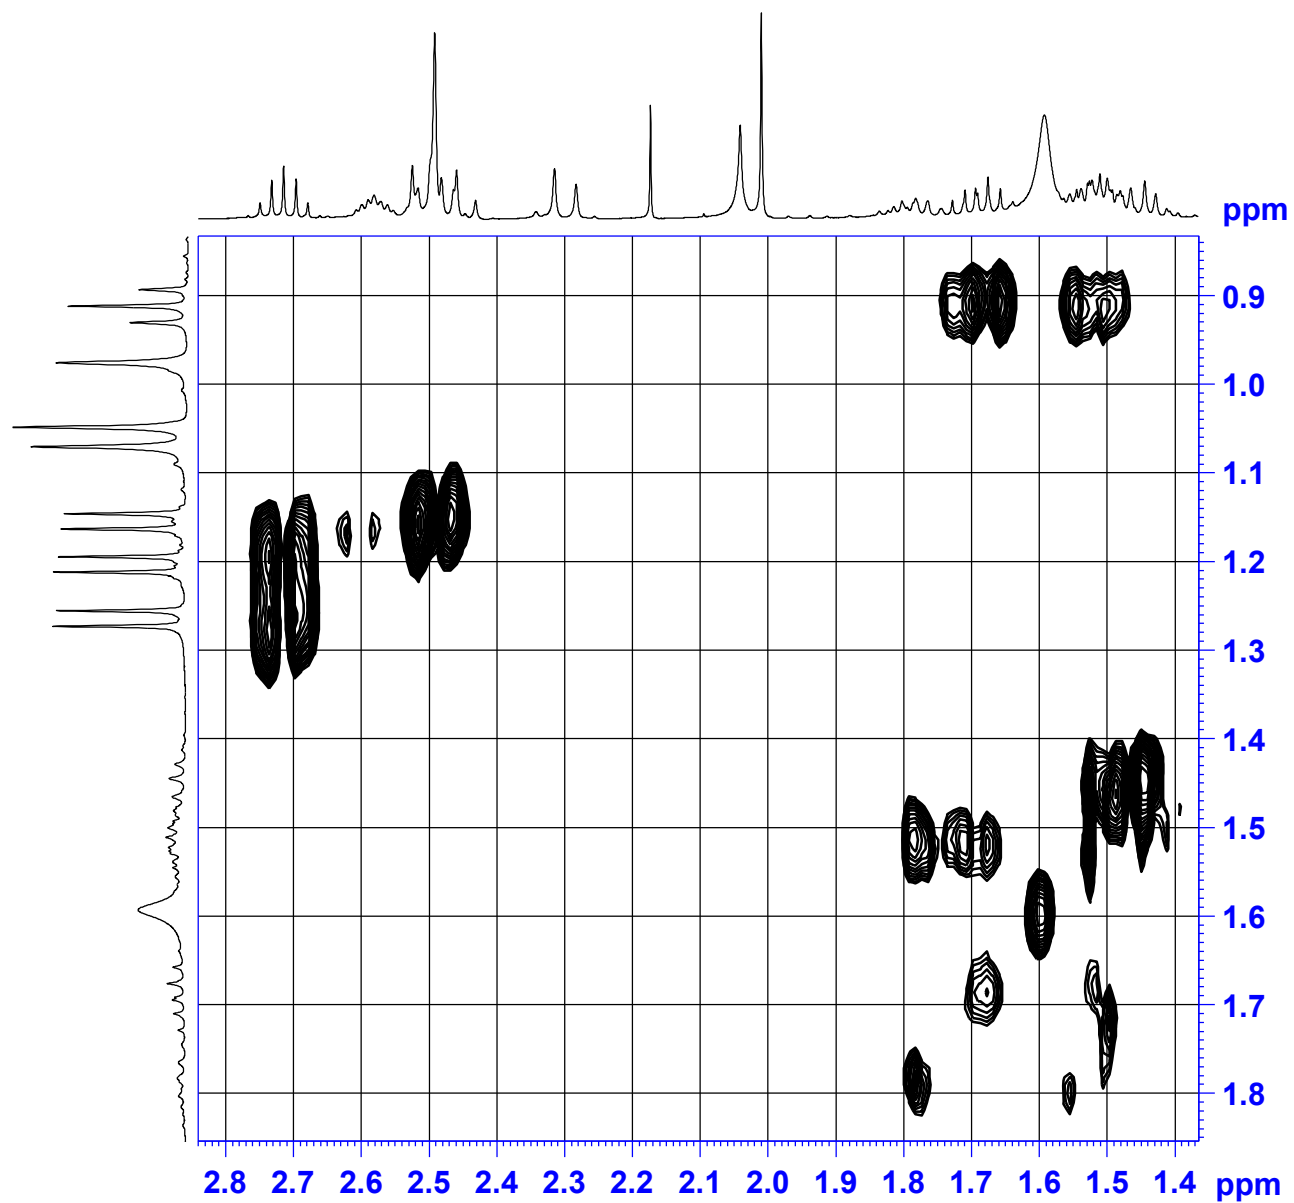

$^1\text{H}$ - $^1\text{H}$  COSY spectrum of Krishnolide C (**3**) in  $\text{CDCl}_3$

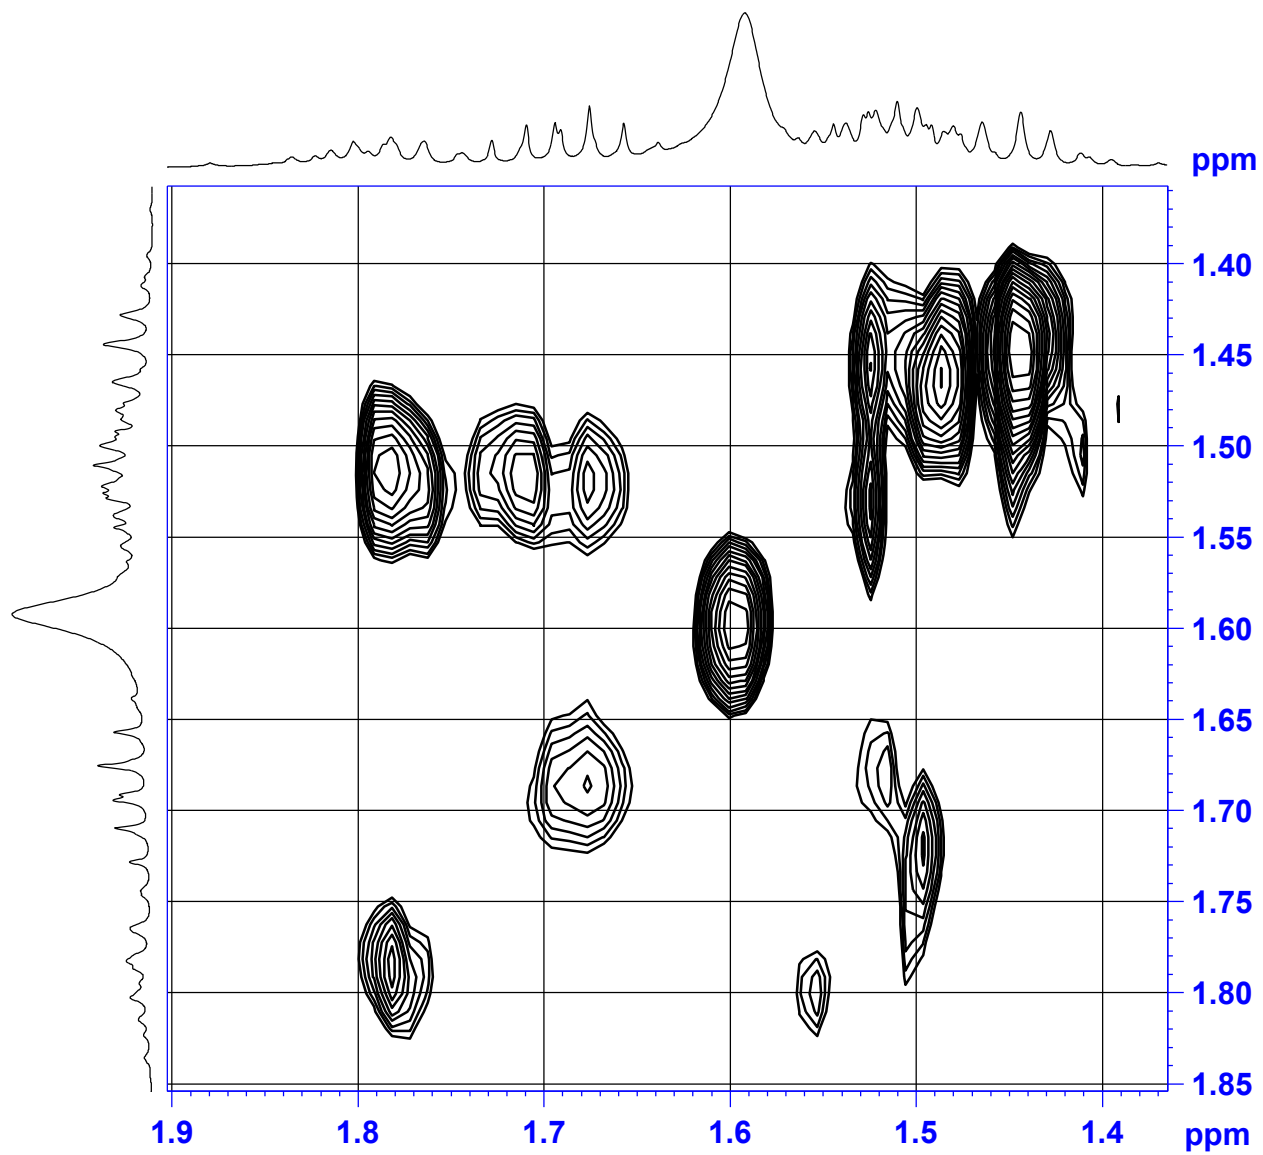



# HSQC spectrum of Krishnolide C (3) in CDCl<sub>3</sub>

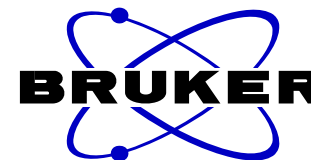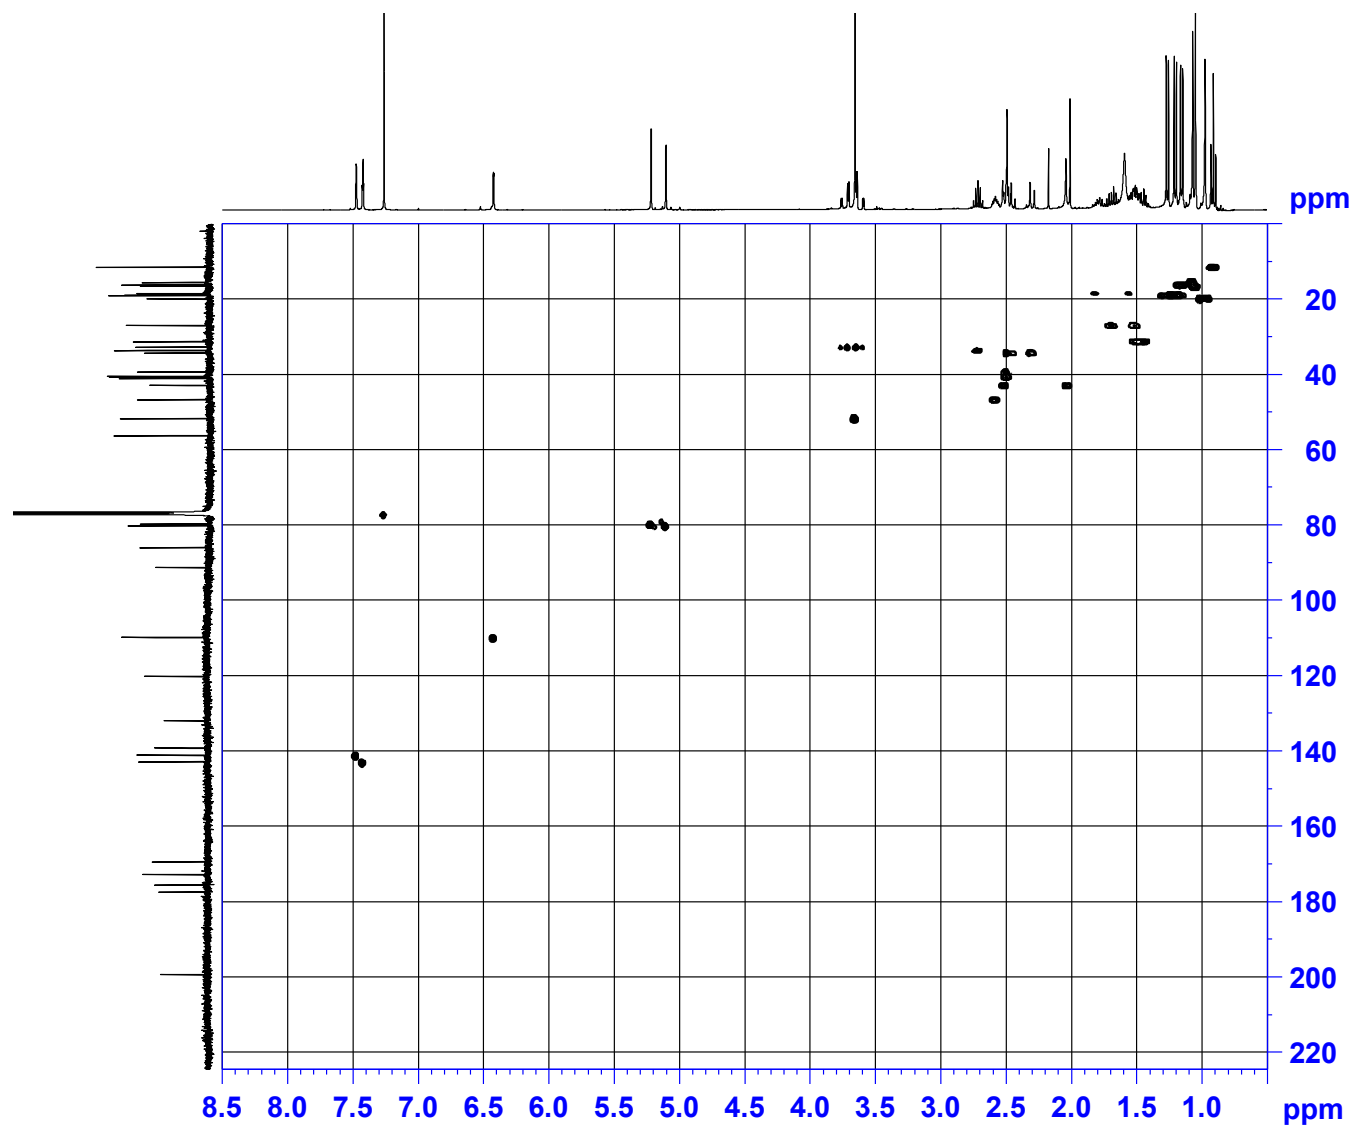

```

NAME          zq-26
EXPNO         5
PROCNO        1
Date_         20170707
Time          5.37
INSTRUM       spect
PROBHD        5 mm CPPBBO BB
PULPROG       hsqcetgps12
TD            1024
SOLVENT       CDCl3
NS            16
DS            16
SWH           4302.926 Hz
FIDRES        4.202076 Hz
AQ            0.1190388 sec
RG            208.5
DW            116.200 usec
DE            10.00 usec
TE            297.0 K
CNST2         145.0000000
D0            0.00000300 sec
D1            1.46497905 sec
D4            0.00172414 sec
D11           0.03000000 sec
D16           0.00020000 sec
D24           0.00086207 sec
INO           0.00002080 sec
ZGOPTNS
    
```

```

===== CHANNEL f1 =====
SFO1          400.1320007 MHz
NUC1          1H
P1            11.50 usec
P2            23.00 usec
P28           0.00 usec
ND0           2
TD            256
SFO1          100.6233 MHz
FIDRES        93.900238 Hz
SW            238.896 ppm
FnMODE        Echo-Antiecho
SI            1024
SF            400.1300063 MHz
WDW           QSINE
SSB           2
LB            0.00 Hz
GB            0
PC            1.40
SI            1024
MC2           echo-antiecho
SF            100.6127593 MHz
WDW           QSINE
SSB           2
LB            0.00 Hz
GB            0
    
```

HSQC spectrum of Krishnolide C (**3**) in CDCl<sub>3</sub>

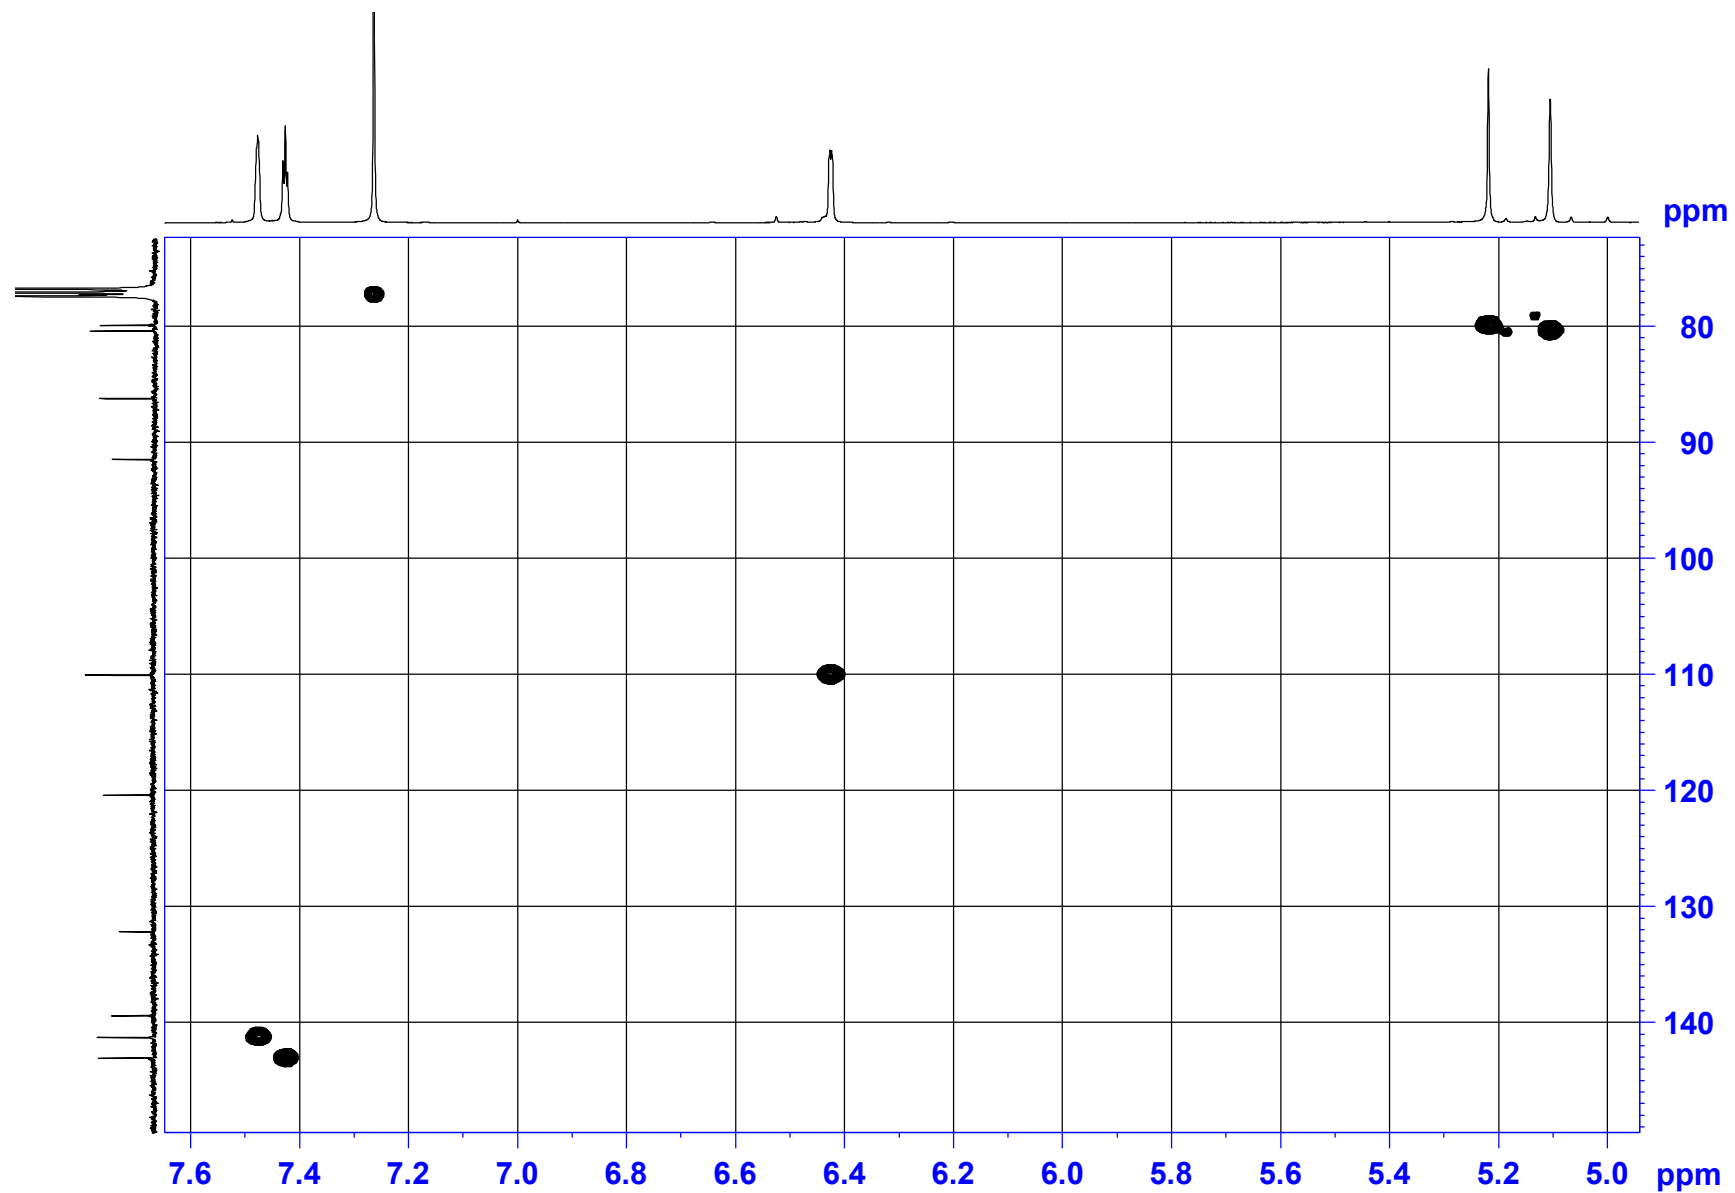

# HSQC spectrum of Krishnolide C (3) in CDCl<sub>3</sub>

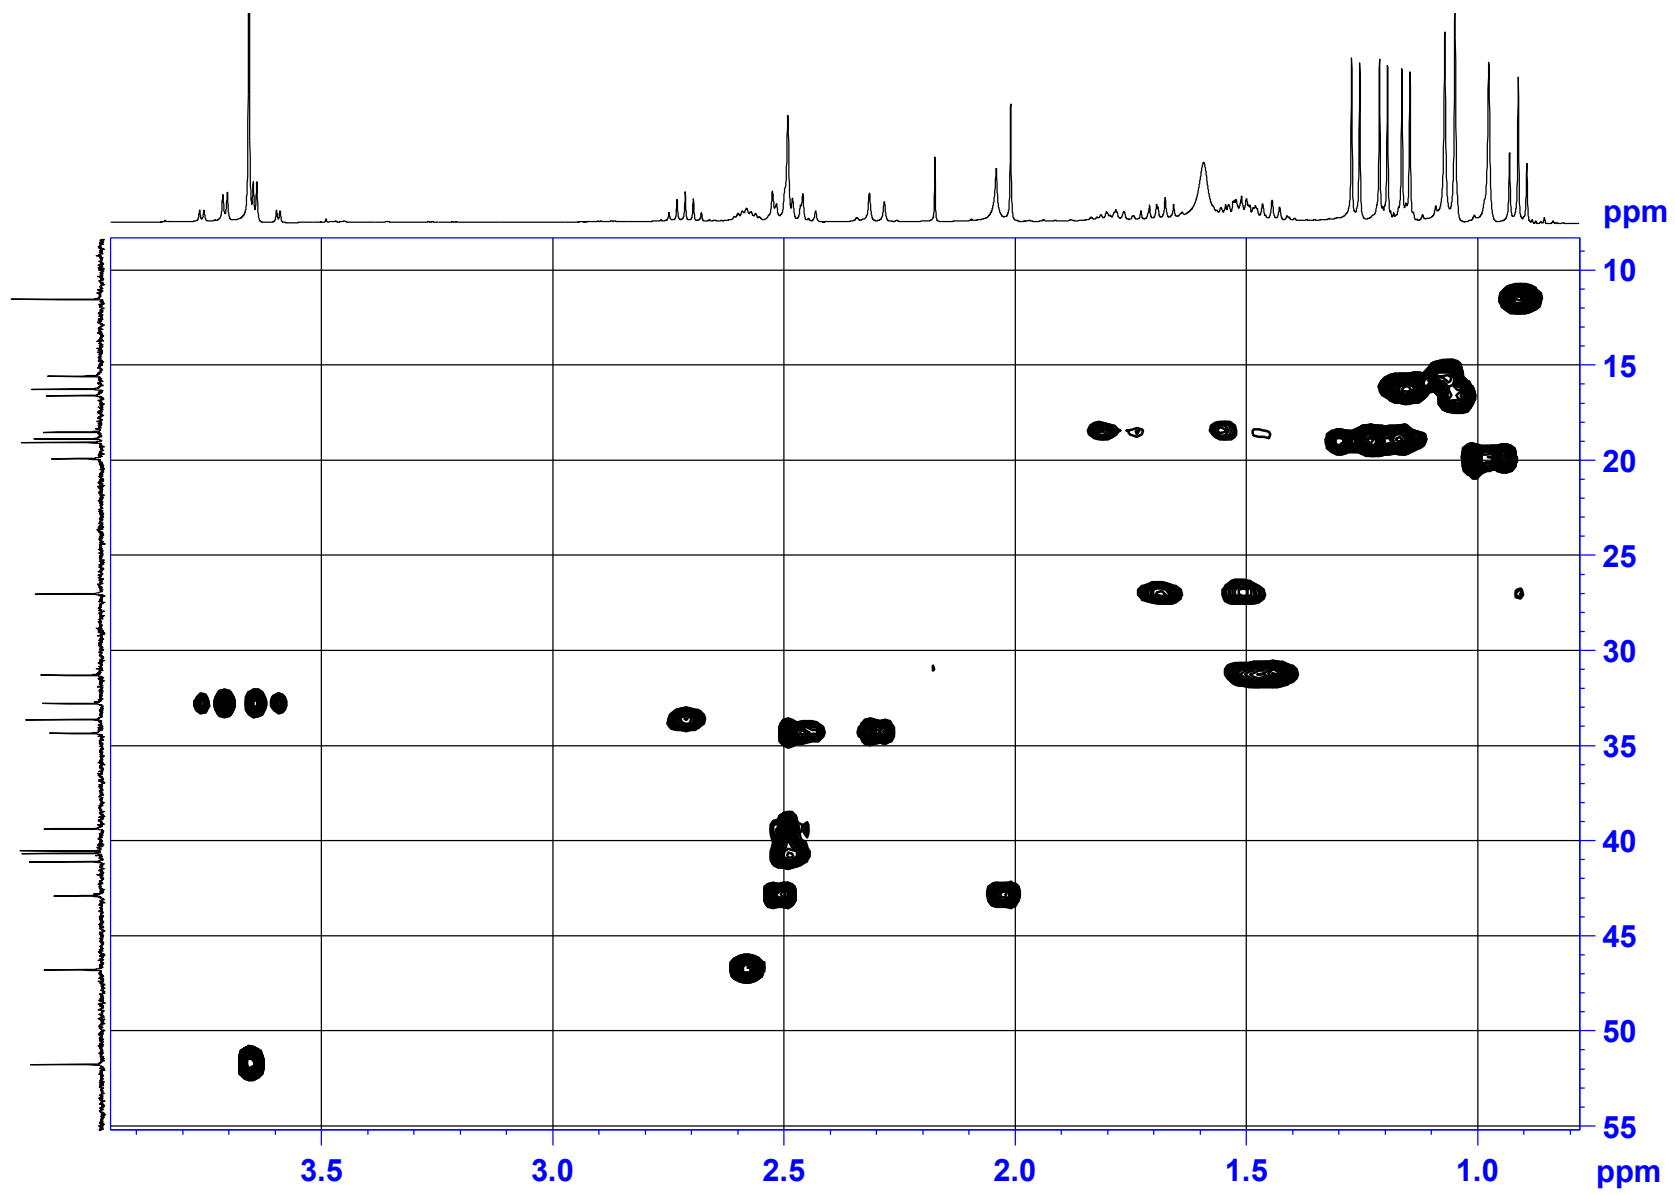

# HSQC spectrum of Krishnolide C (3) in CDCl<sub>3</sub>

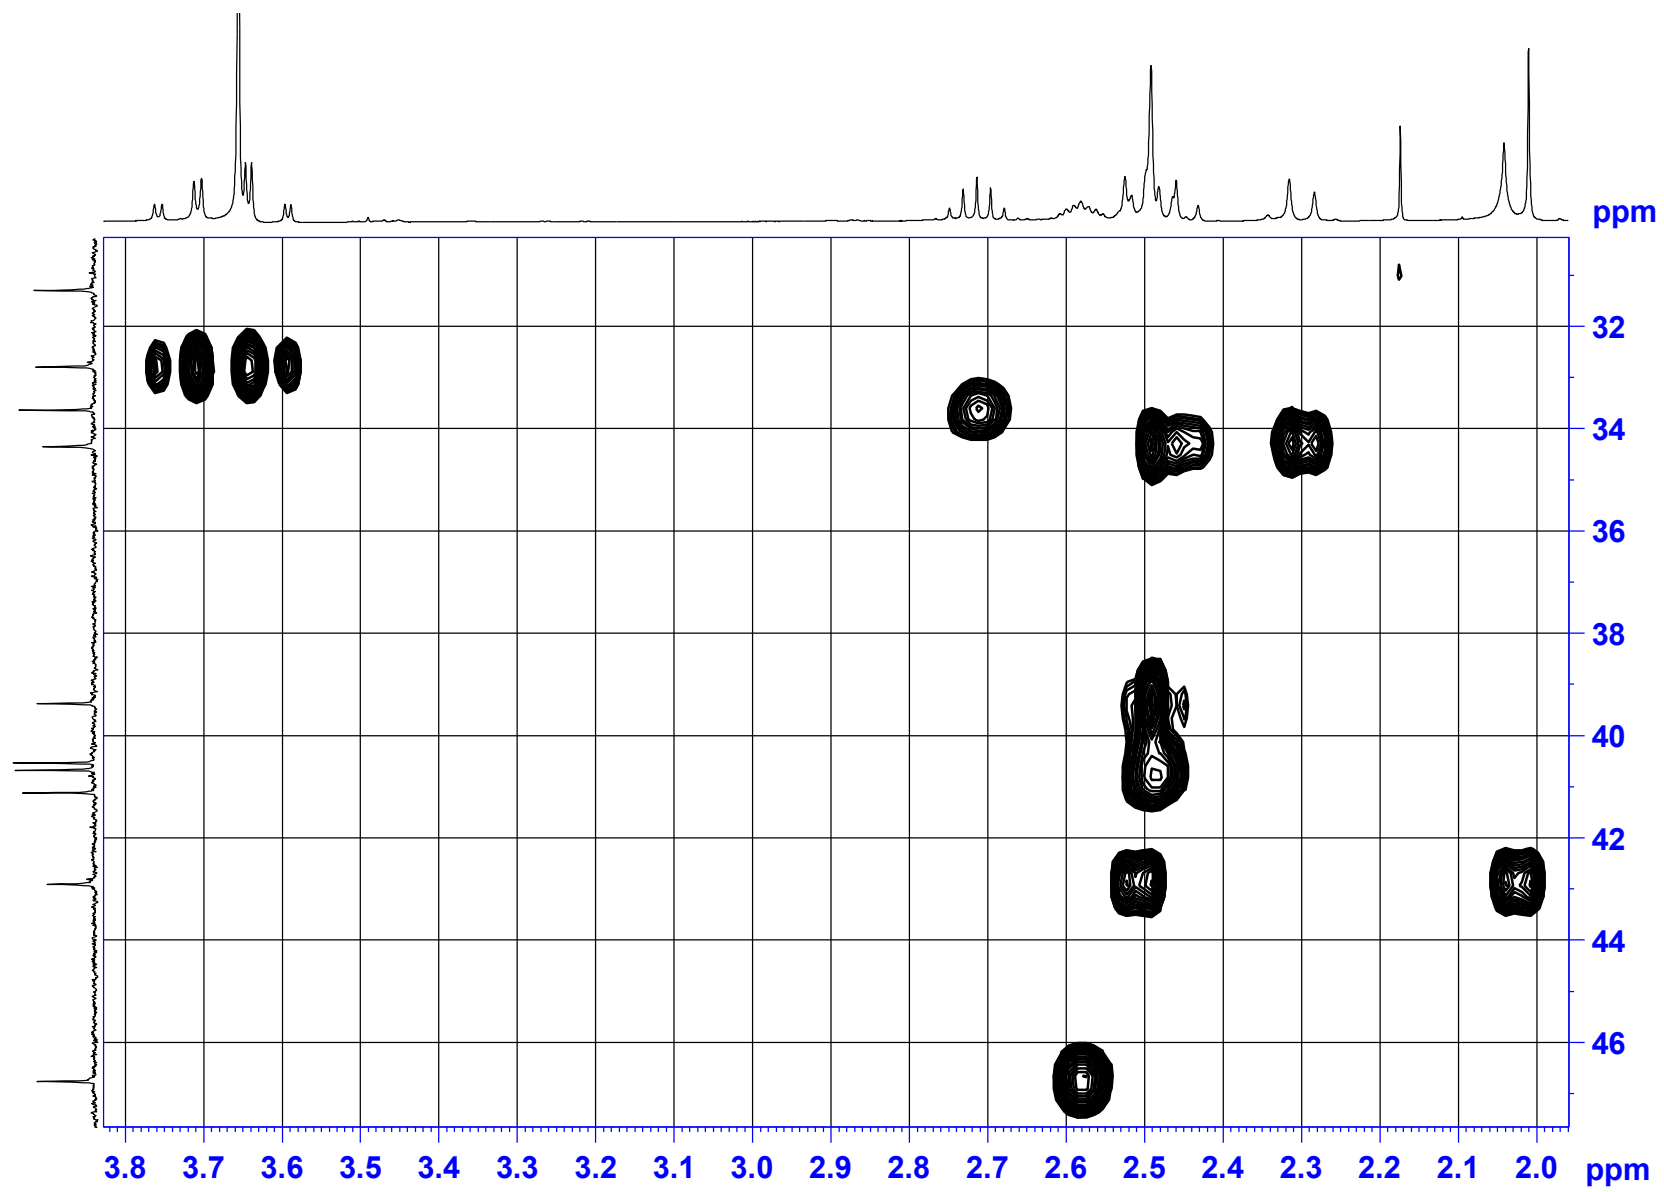

# HSQC spectrum of Krishnolide C (**3**) in CDCl<sub>3</sub>

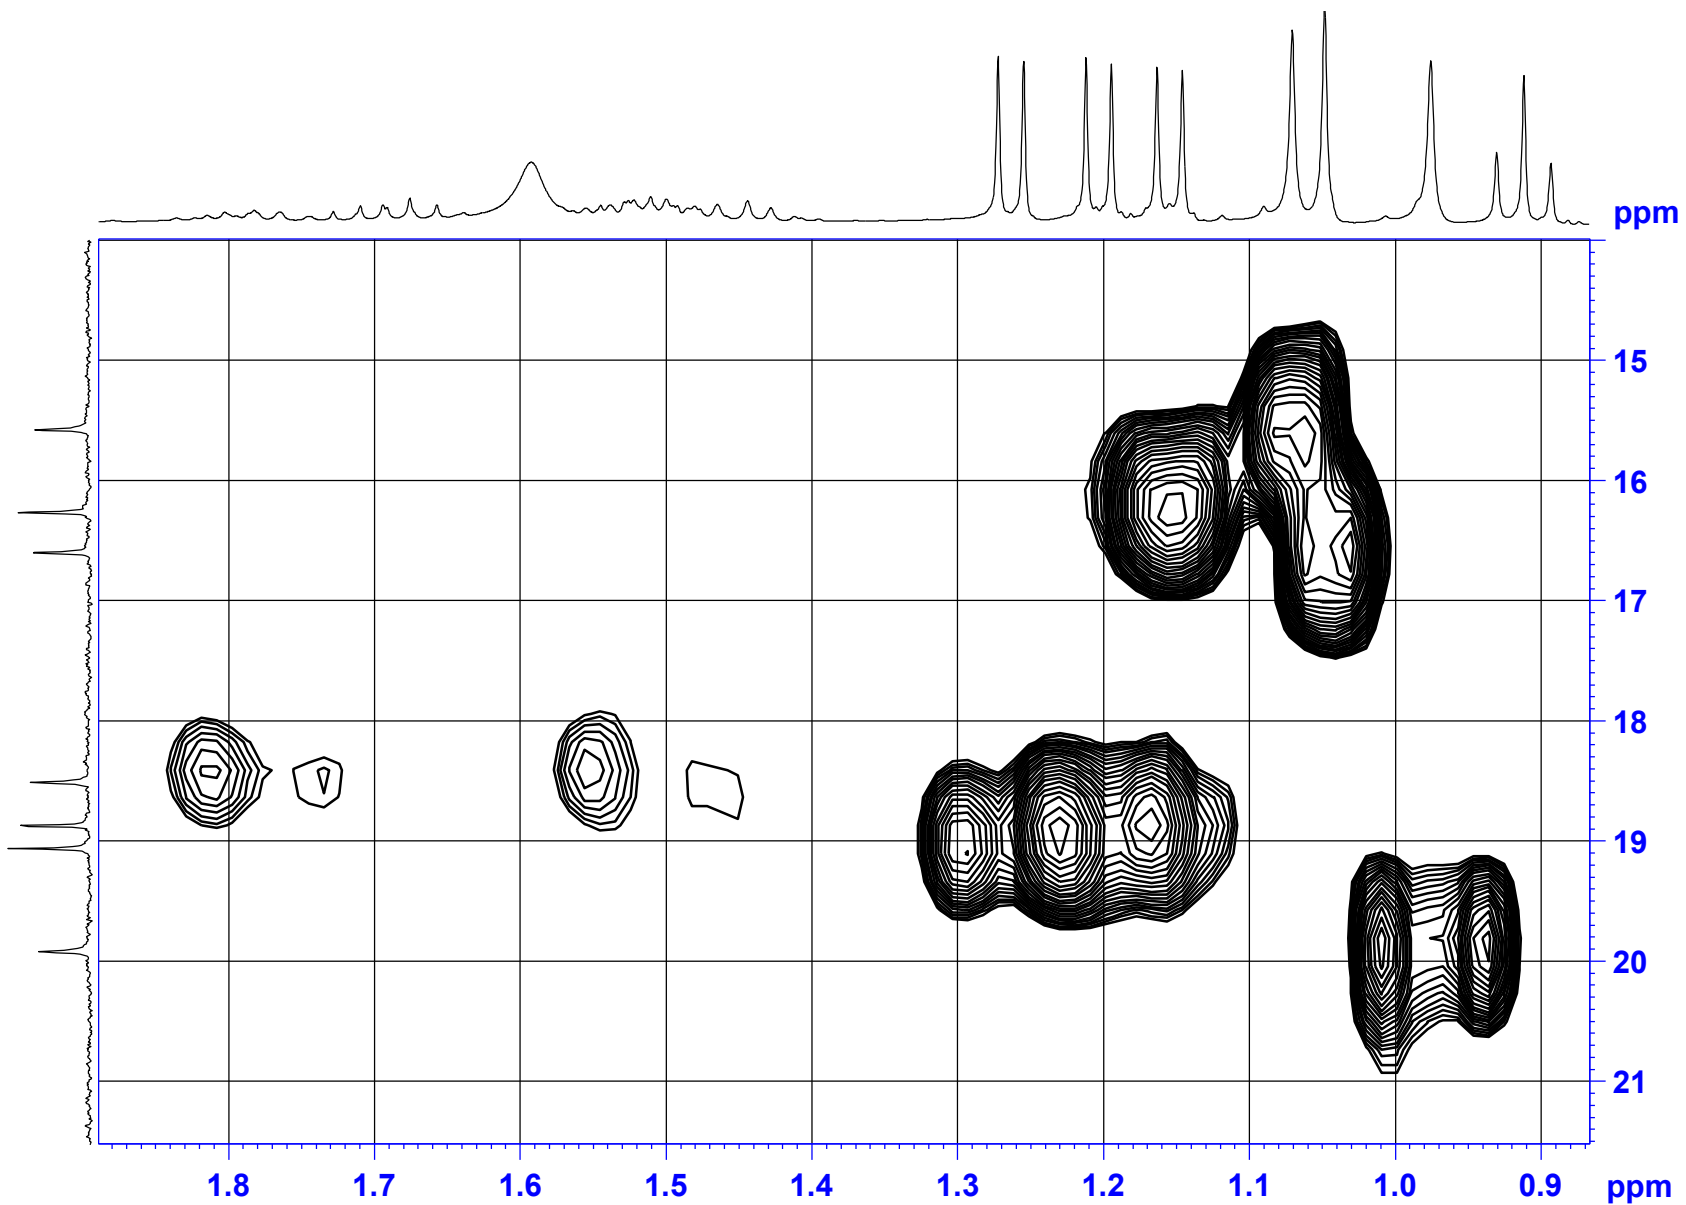

# HMBC spectrum of Krishnolide C (3) in CDCl<sub>3</sub>

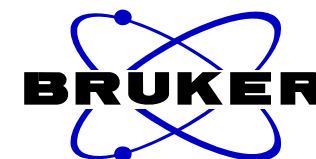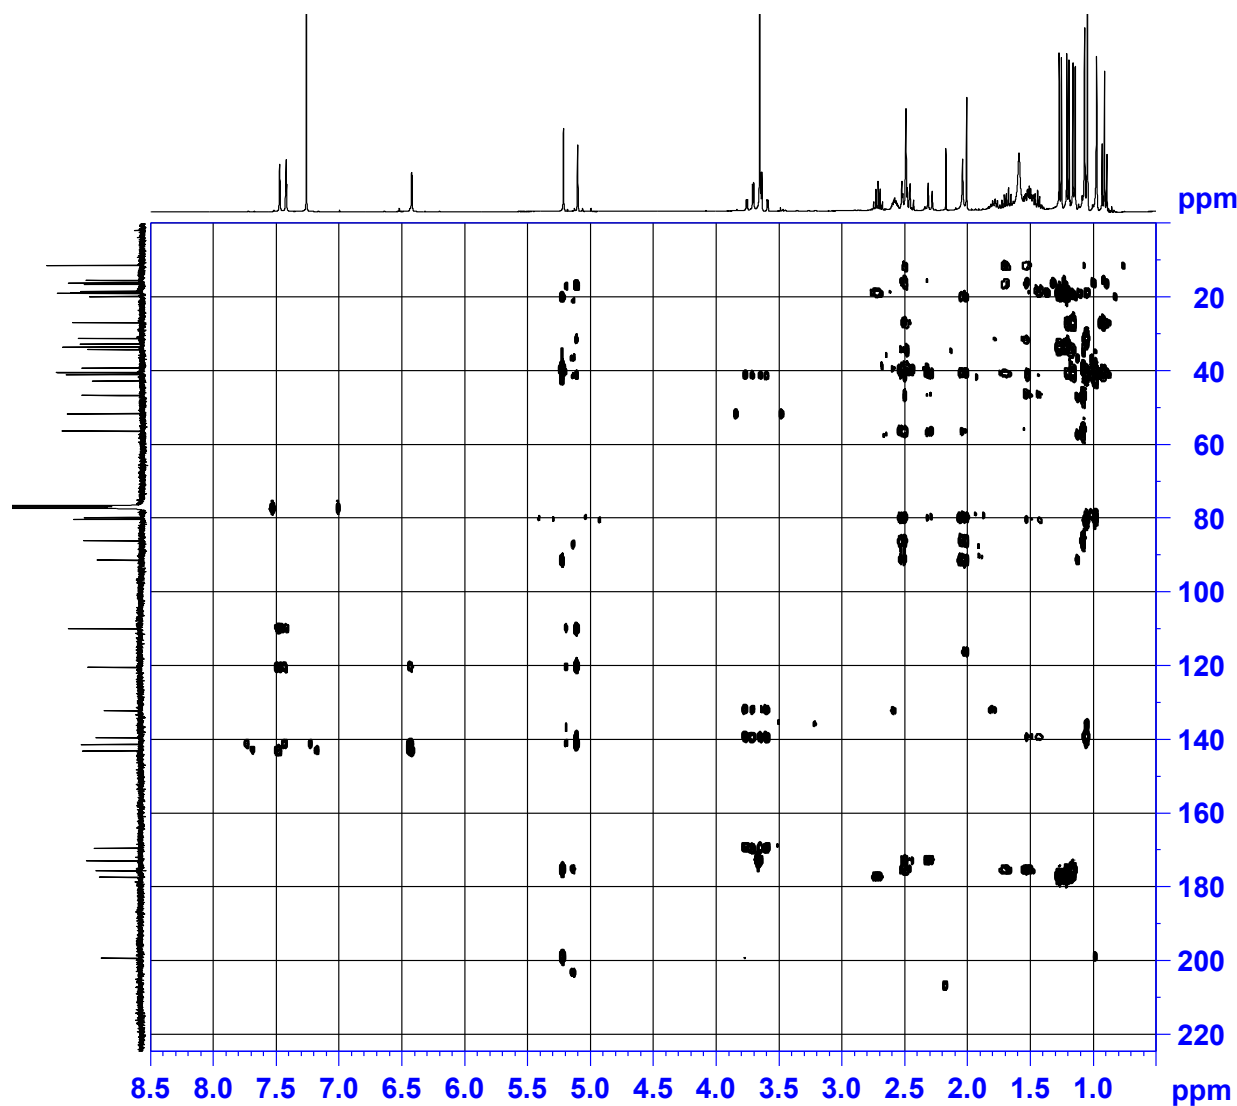

```

NAME          zq-26
EXPNO         6
PROCNO        1
Date_         20170707
Time          7.29
INSTRUM       spect
PROBHD        5 mm CPPBBO BB
PULPROG       hmbcggplndqf
TD            4096
SOLVENT       CDCl3
NS            32
DS            16
SWH           5197.505 Hz
FIDRES        1.268922 Hz
AQ            0.3940852 sec
RG            208.5
DW            96.200 usec
DE            10.00 usec
TE            297.0 K
CNST2         145.0000000
CNST13        10.0000000
D0            0.00000300 sec
D1            1.50000000 sec
D2            0.00344828 sec
D6            0.05000000 sec
D16           0.00020000 sec
IN0           0.00002080 sec

===== CHANNEL f1 =====
SFO1          400.1323208 MHz
NUC1           1H
P1             11.50 usec
P2             23.00 usec
ND0            2
TD             128
SFO1          100.6233 MHz
FIDRES        187.800476 Hz
SW             238.896 ppm
FnMODE        QF
SI             2048
SF            400.1300063 MHz
WDW            SINE
SSB            0
LB             0.00 Hz
GB             0
PC             1.40
SI             1024
MC2           QF
SF            100.6127593 MHz
WDW            SINE
SSB            0
LB             0.00 Hz
GB             0
    
```

HMBC spectrum of Krishnolide C (**3**) in CDCl<sub>3</sub>

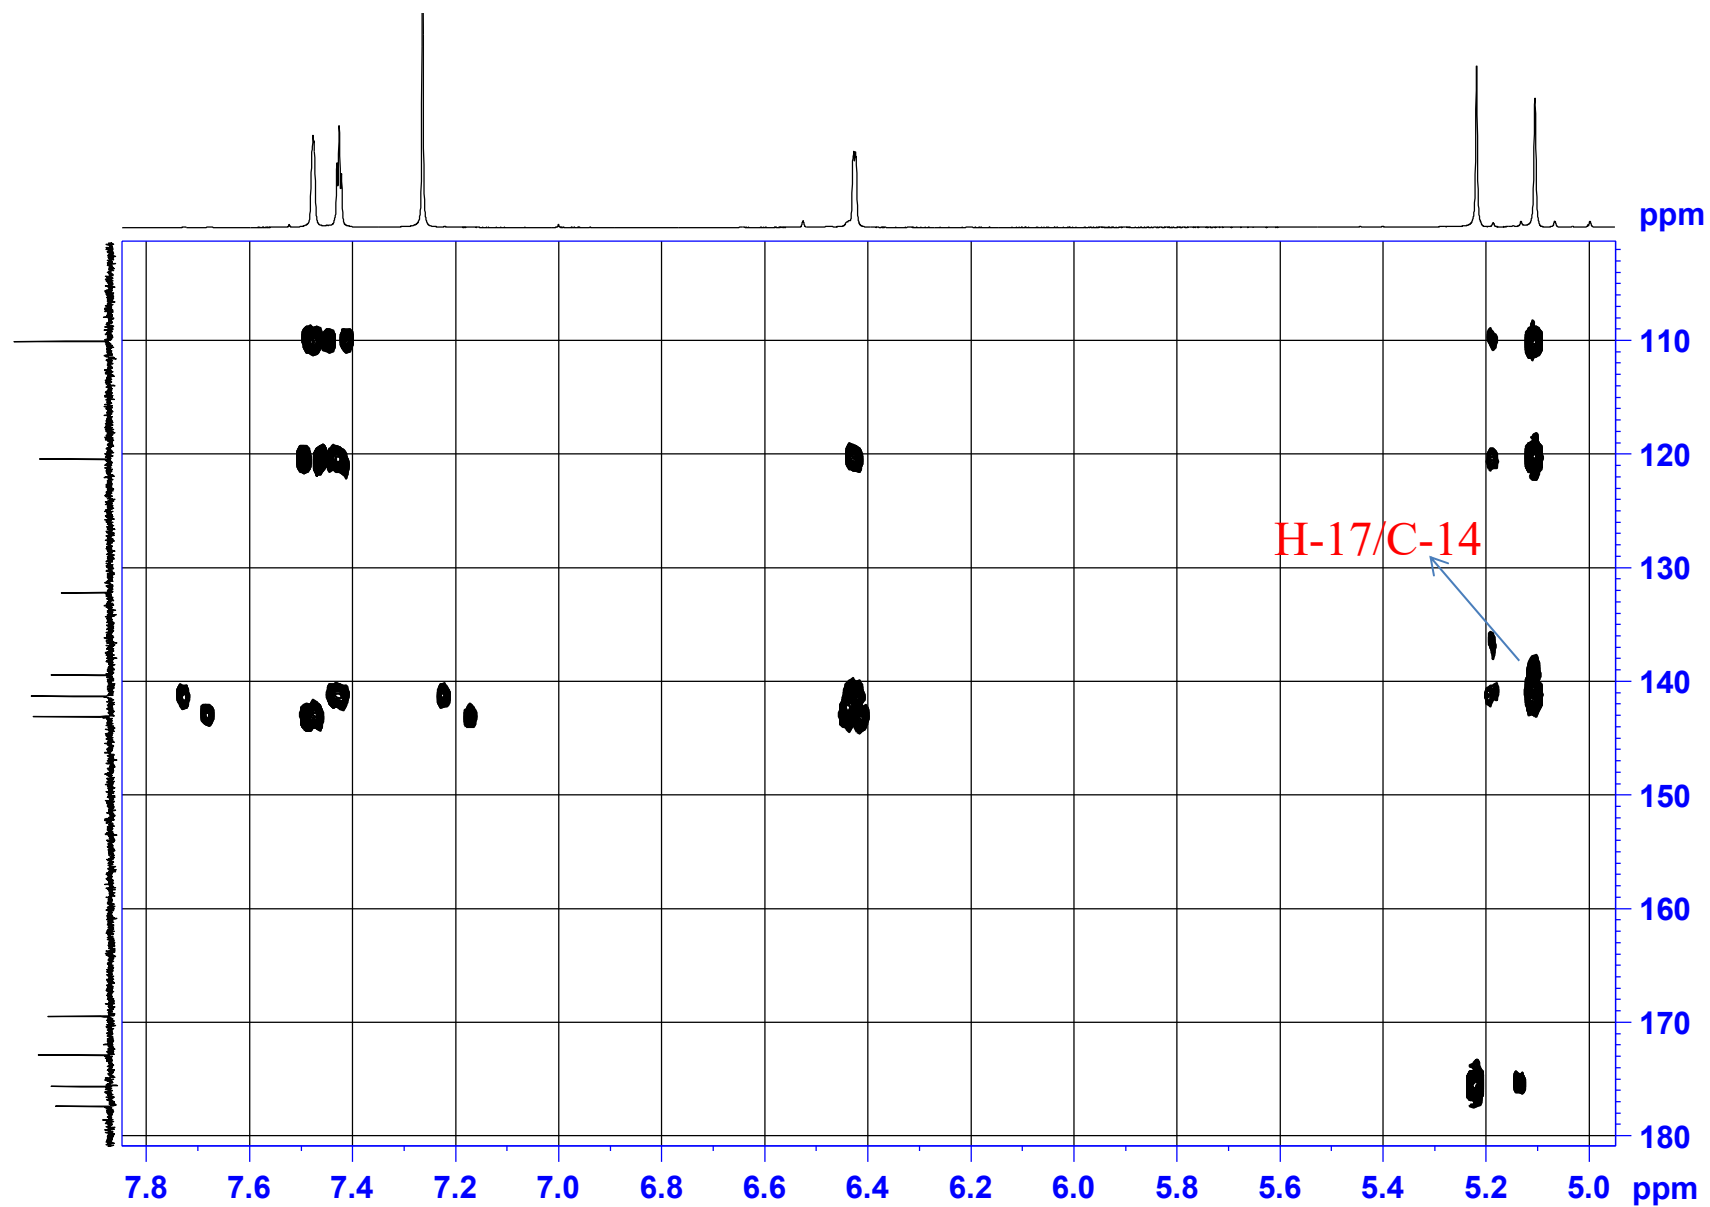

# HMBC spectrum of Krishnolide C (**3**) in CDCl<sub>3</sub>

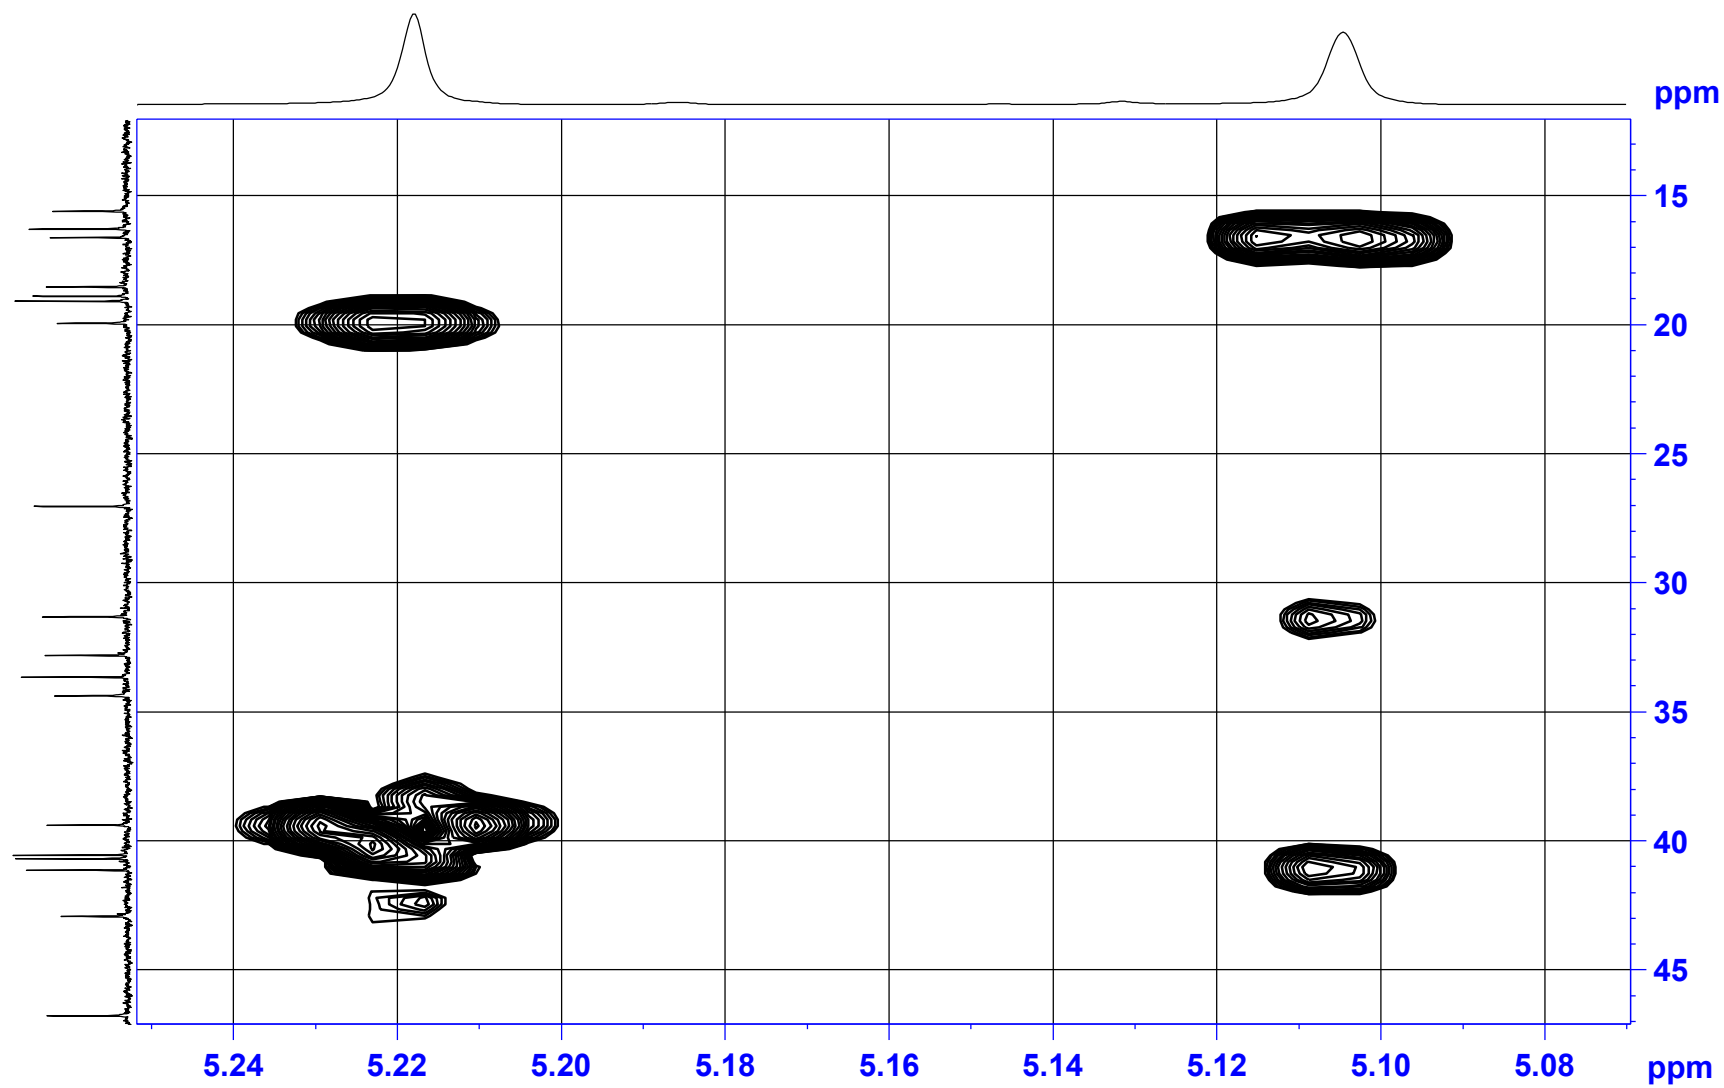



# HMBC spectrum of Krishnolide C (3) in CDCl<sub>3</sub>

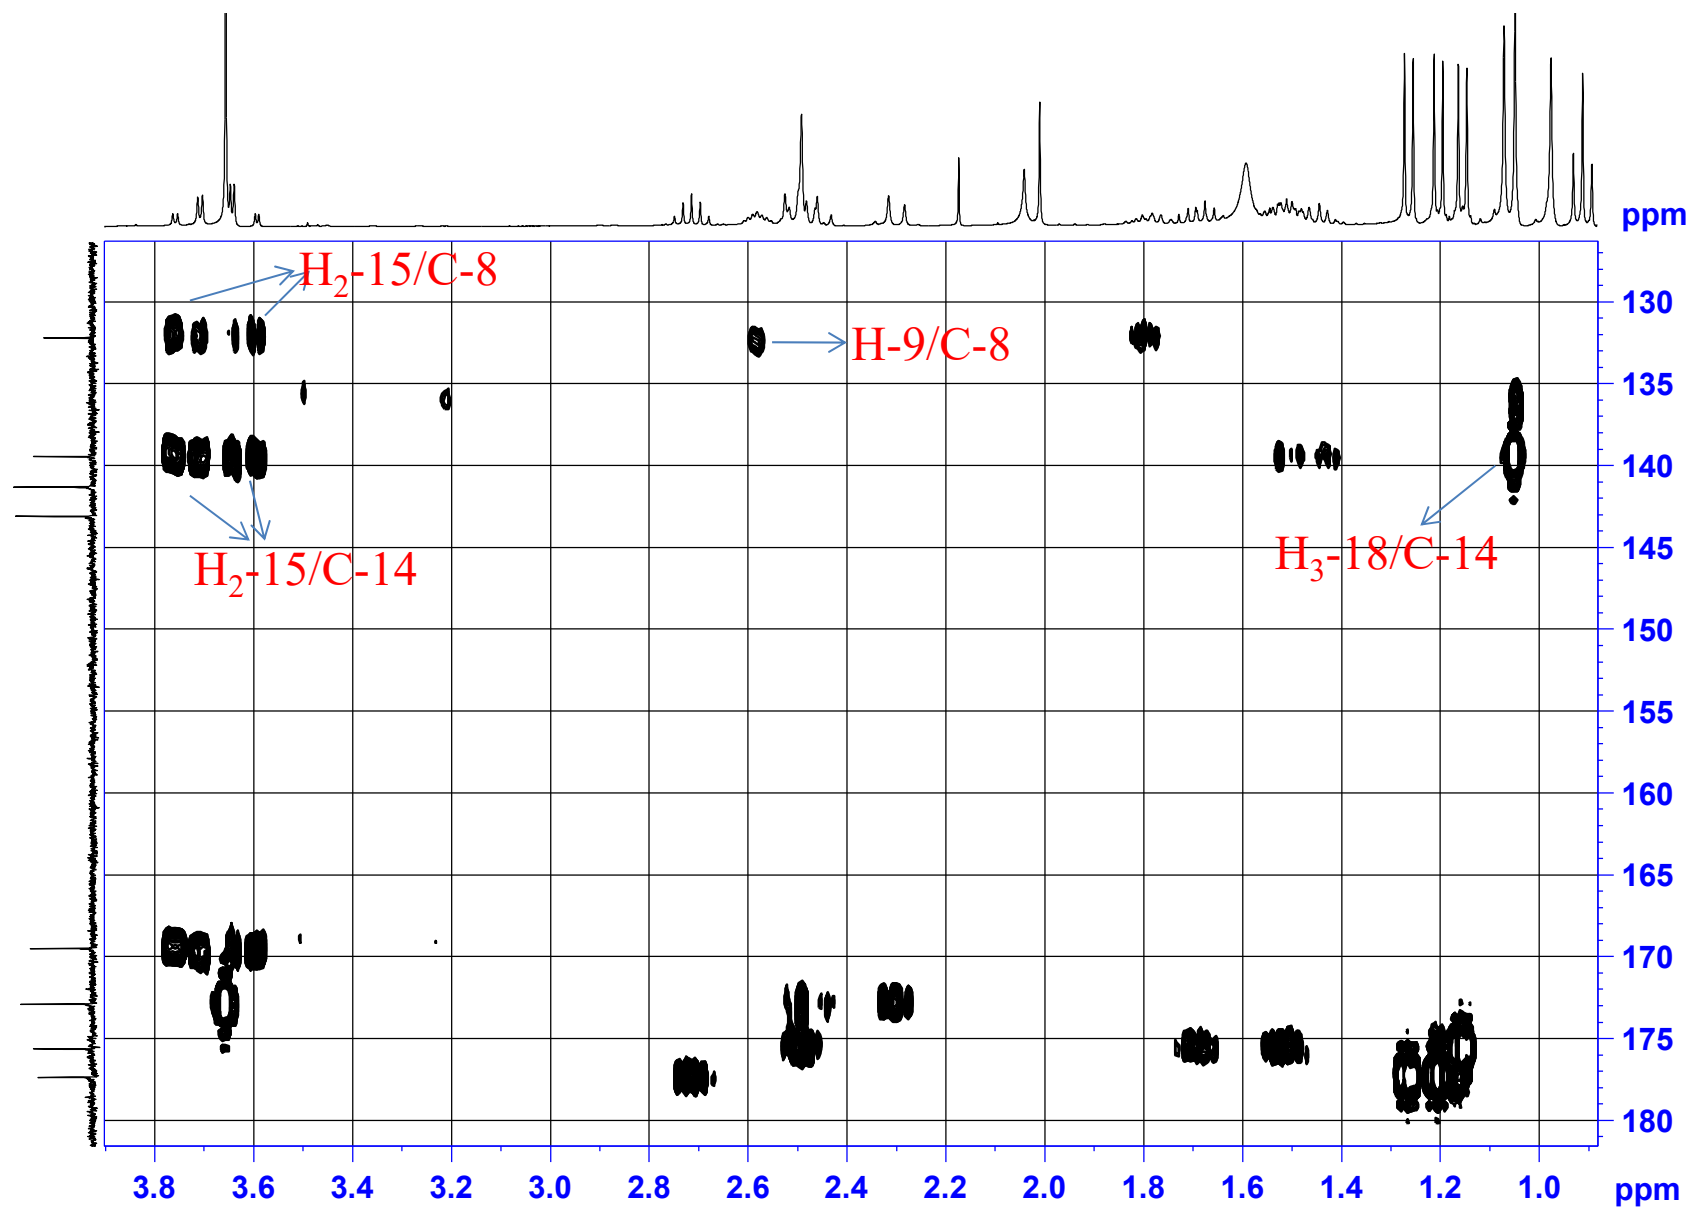

HMBC spectrum of Krishnolide C (**3**) in CDCl<sub>3</sub>

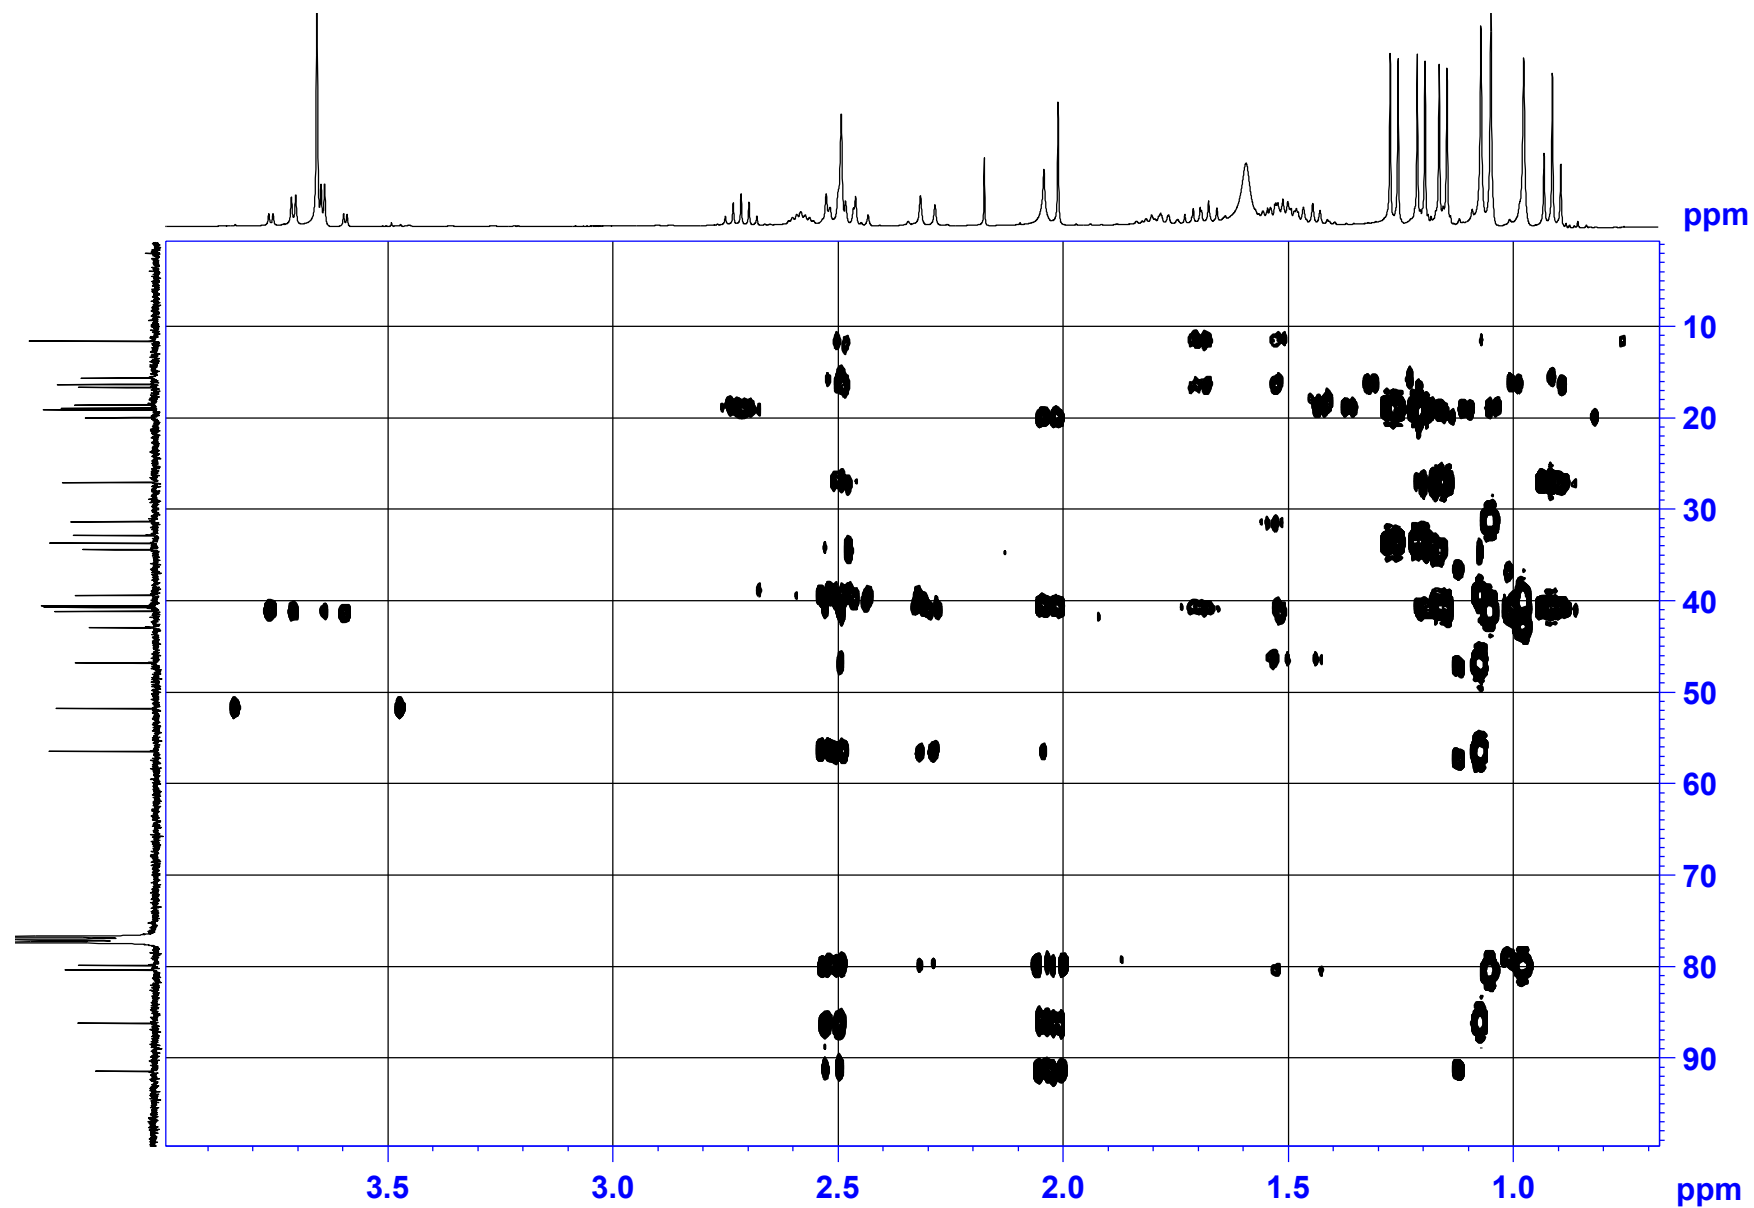

# HMBC spectrum of Krishnolide C (3) in CDCl<sub>3</sub>

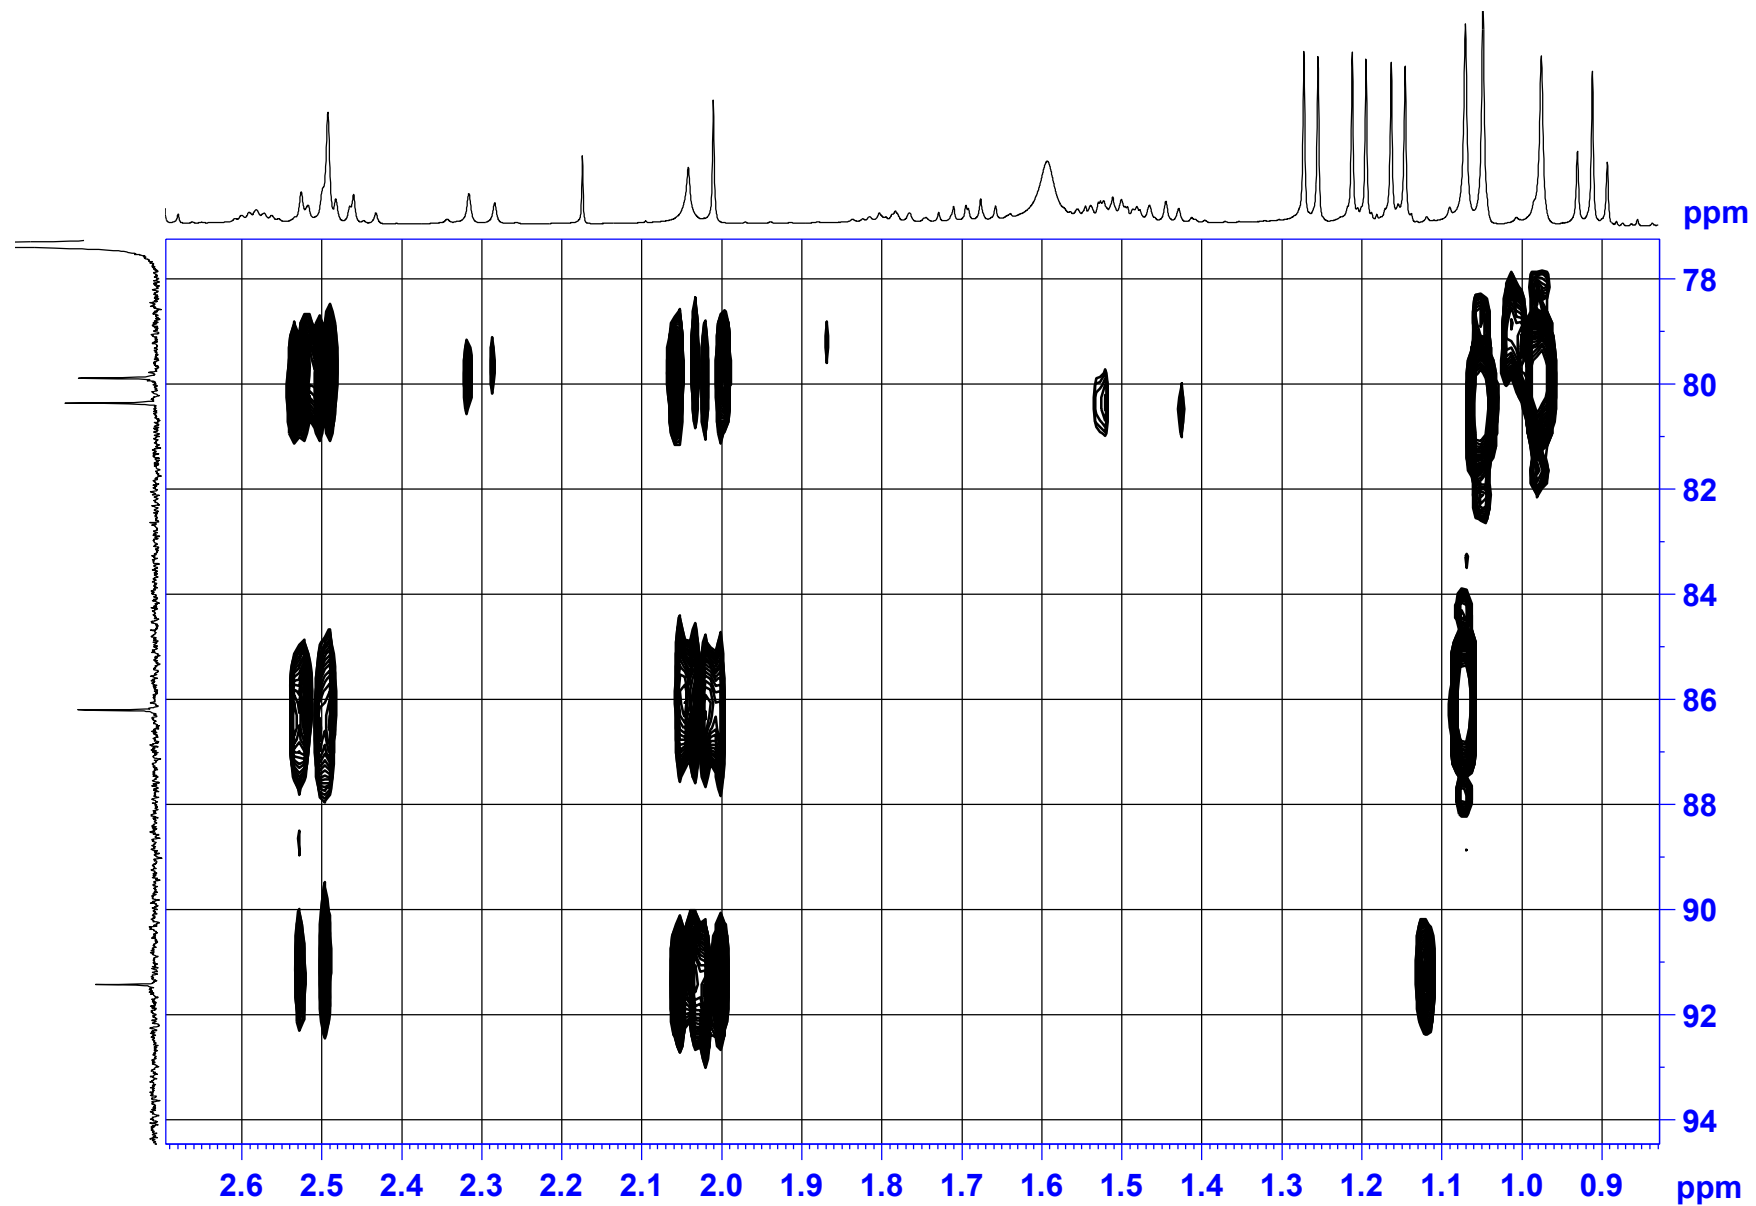

# HMBC spectrum of Krishnolide C (3) in CDCl<sub>3</sub>

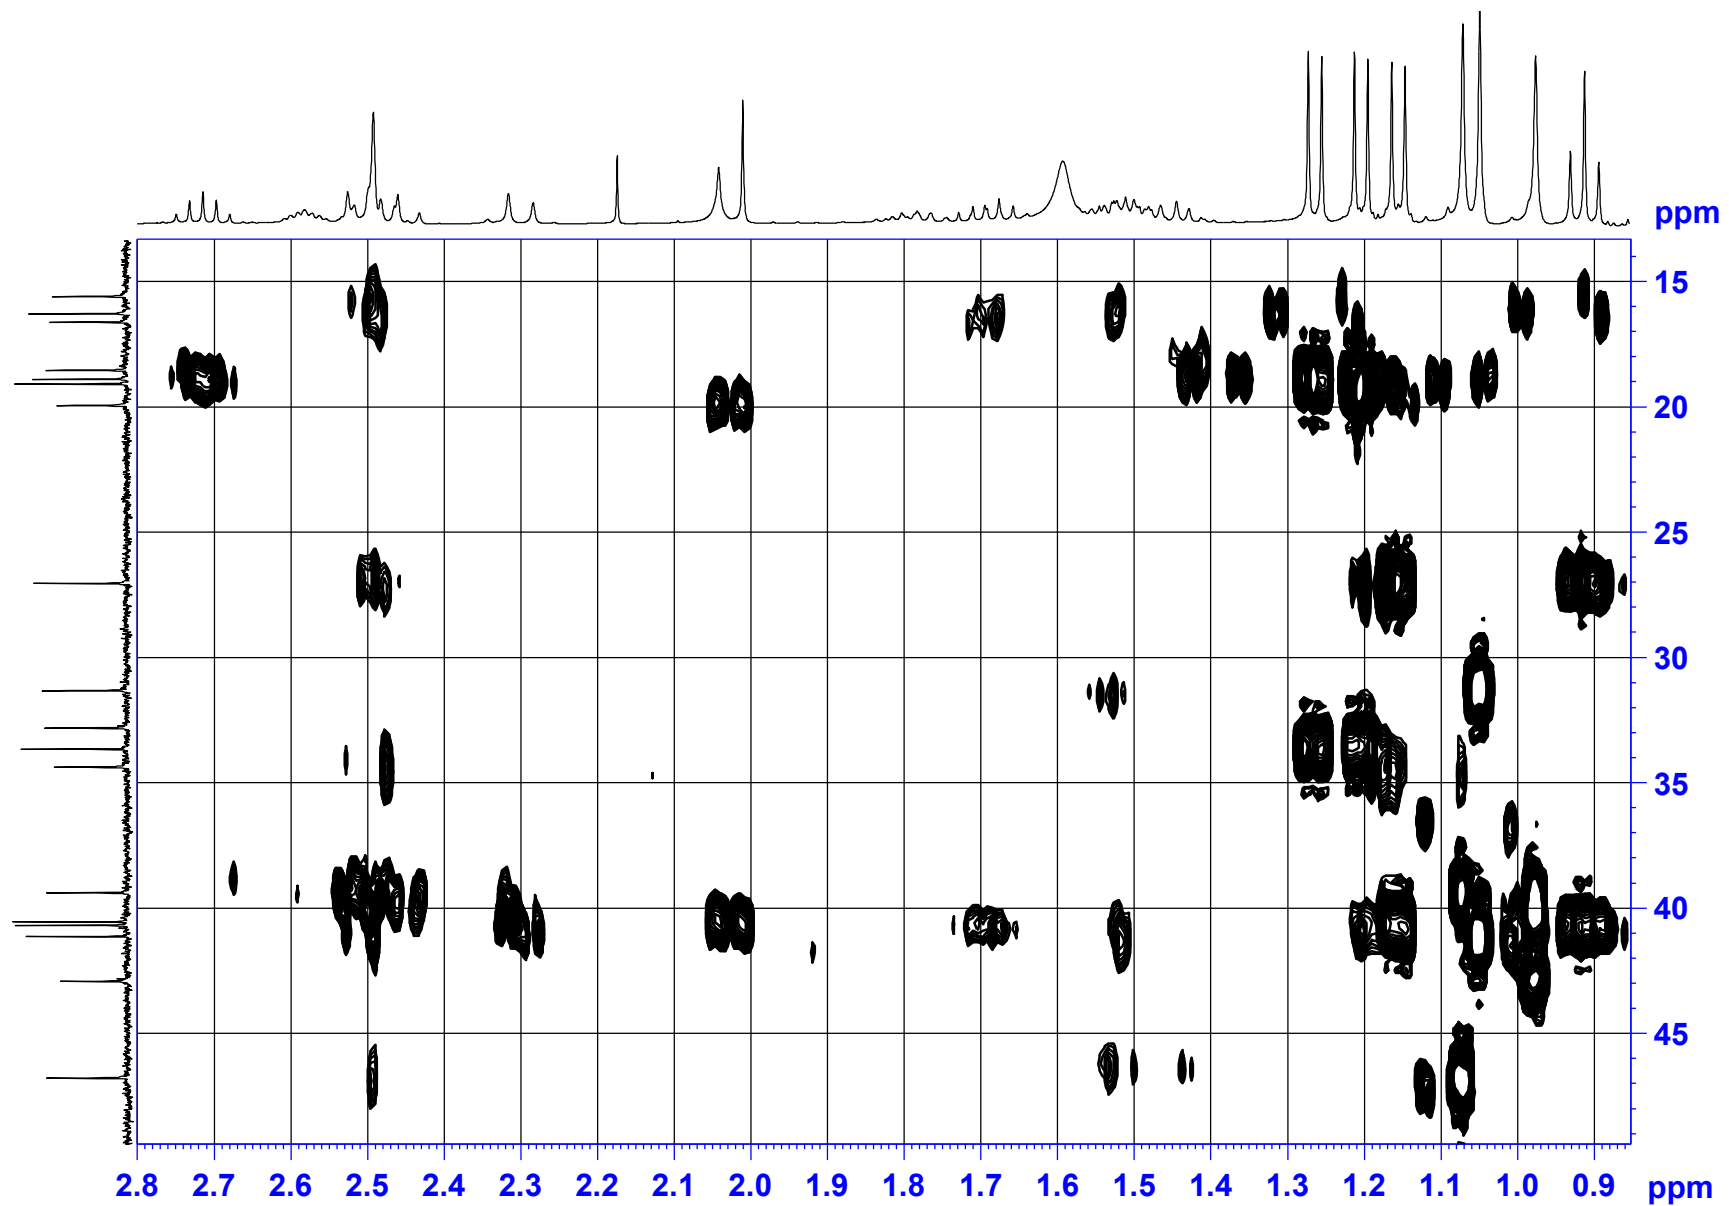

# HMBC spectrum of Krishnolide C (3) in CDCl<sub>3</sub>

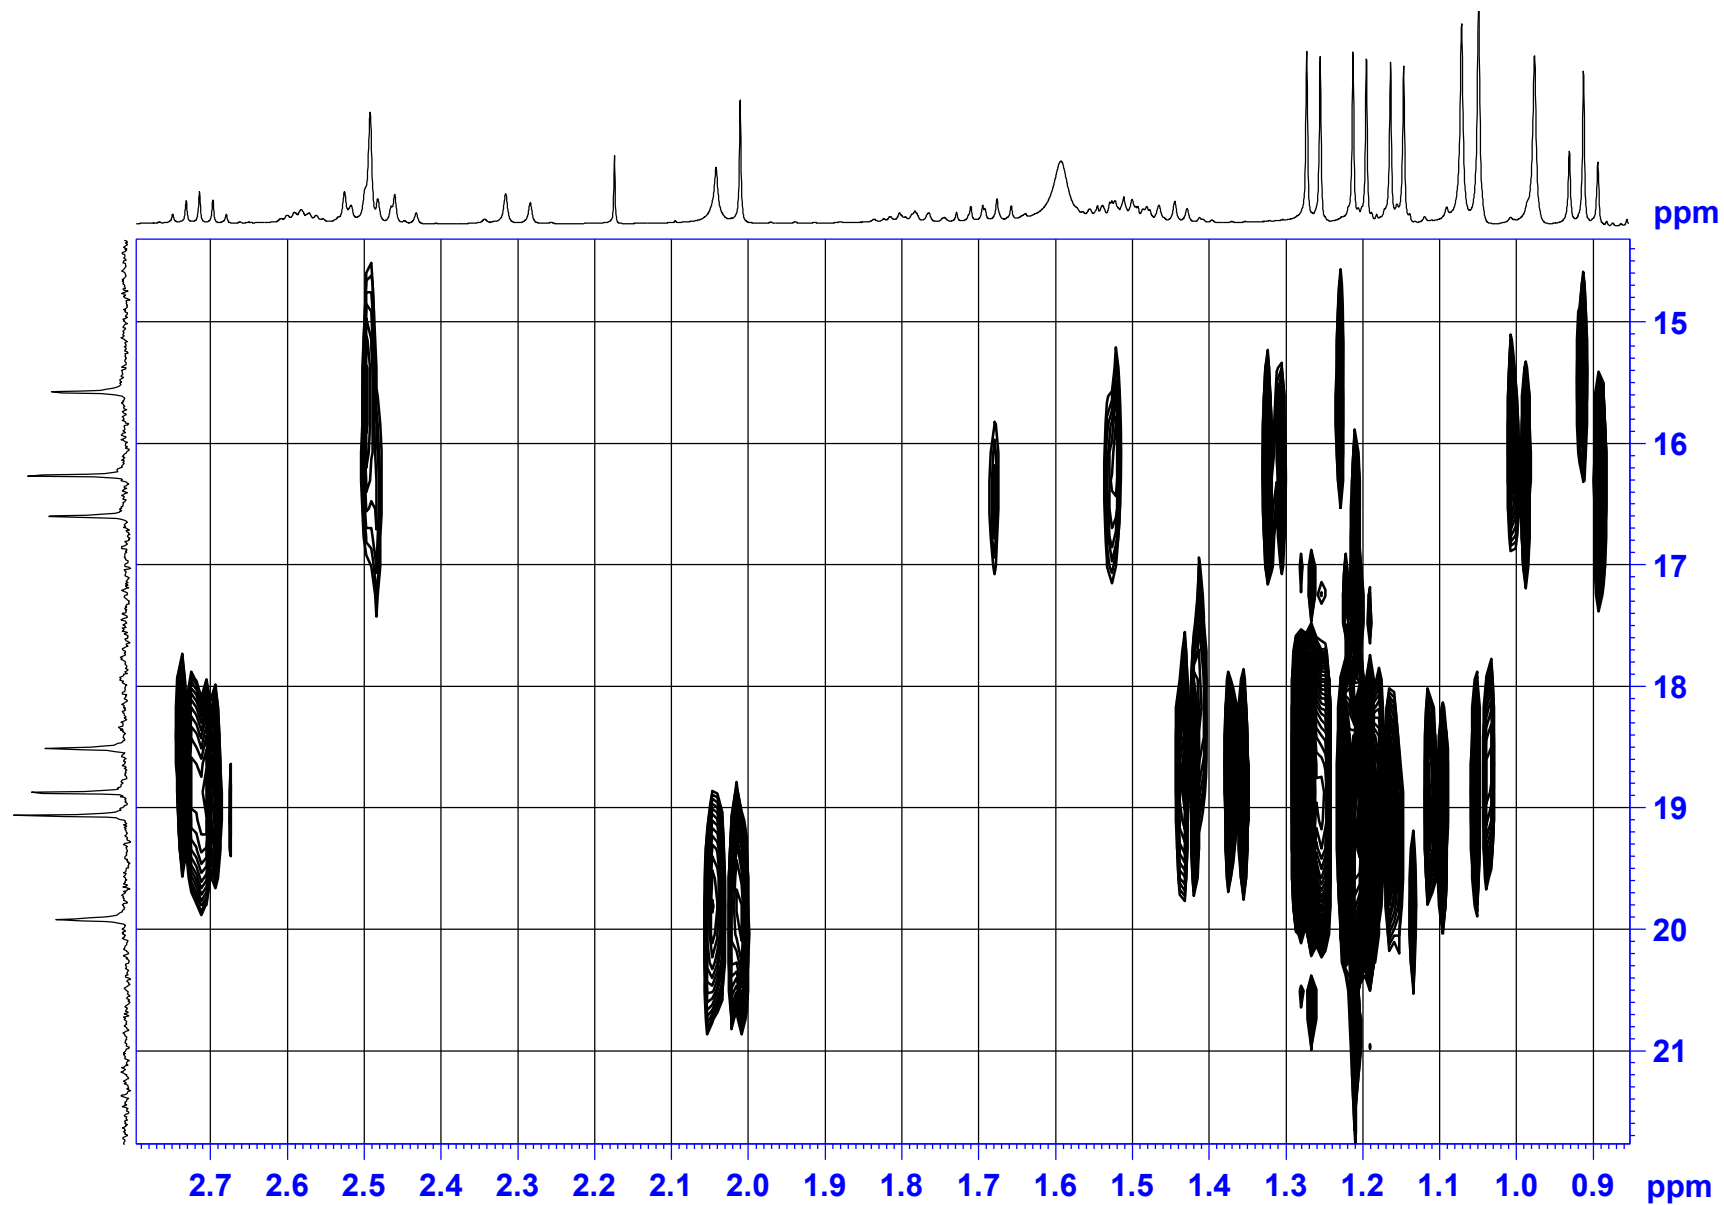

# HMBC spectrum of Krishnolide C (3) in CDCl<sub>3</sub>

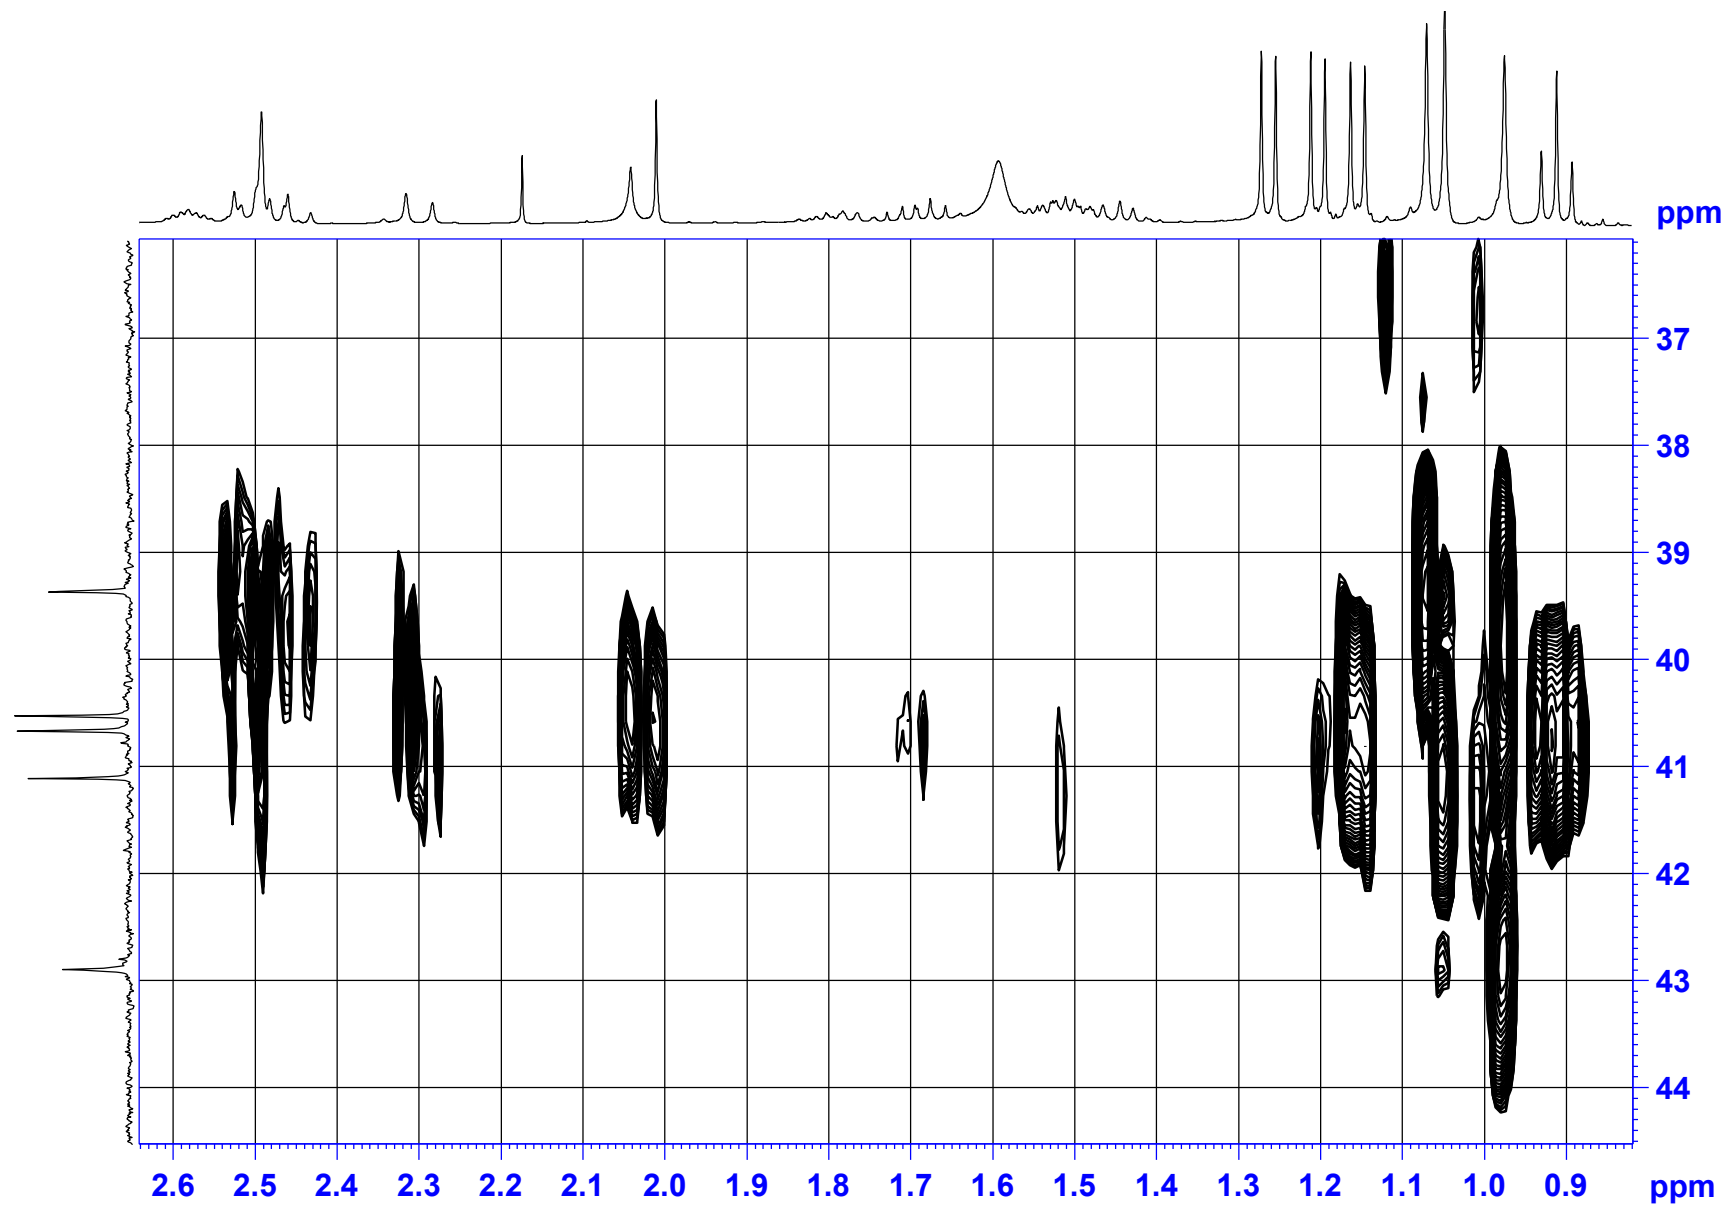

# NOESY spectrum of Krishnolide C (3) in CDCl<sub>3</sub>

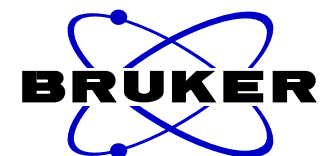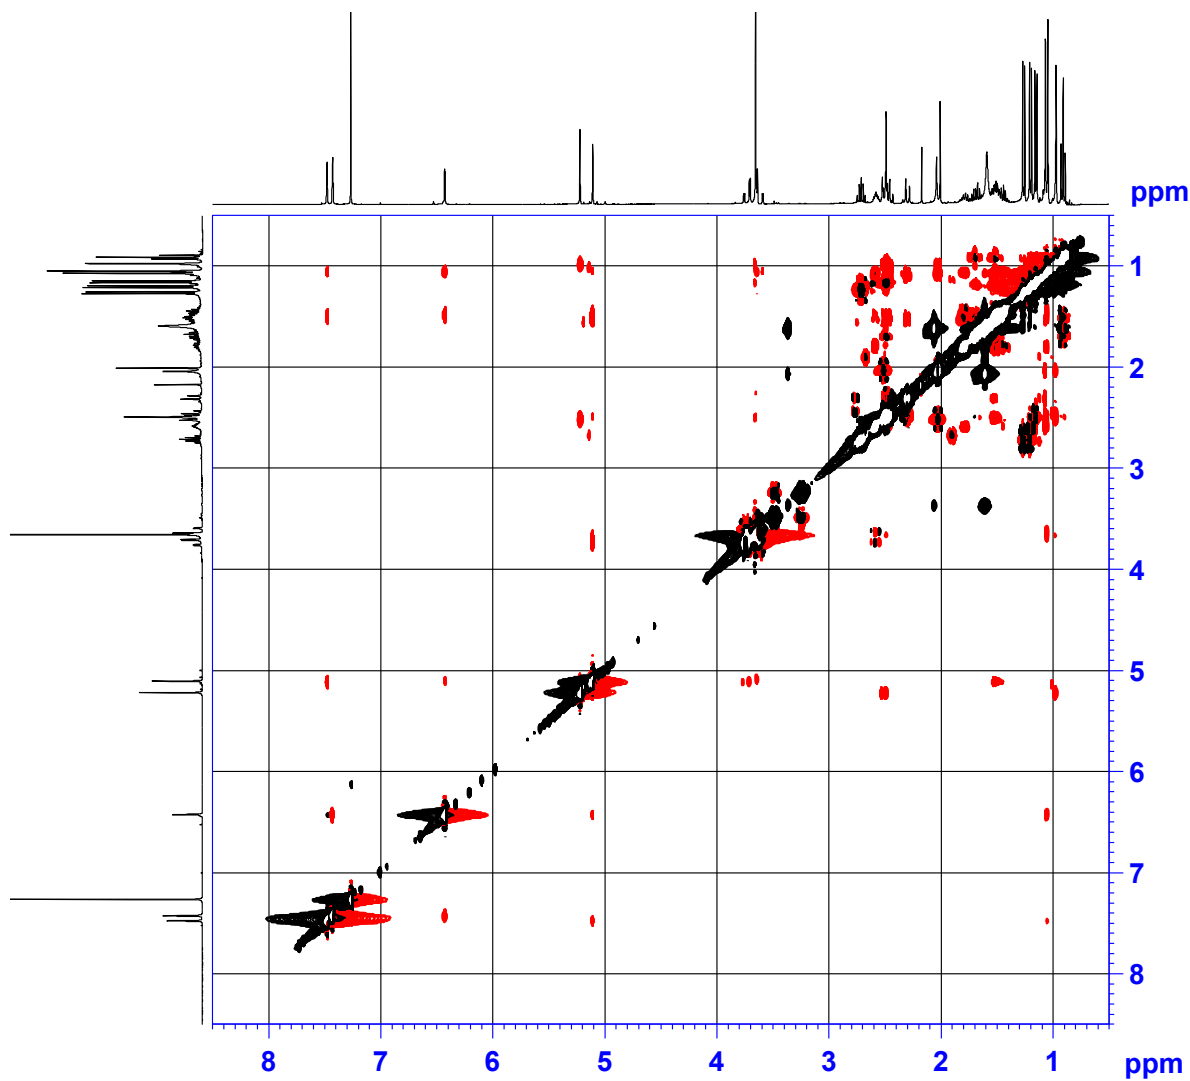

```

NAME          zq-26
EXPNO         7
PROCNO        1
Date_         20170710
Time          4.49
INSTRUM       spect
PROBHD        5 mm CPPBBO BB
PULPROG       noesygpphpp
TD            2048
SOLVENT       CDCl3
NS            16
DS            32
SWH           4000.000 Hz
FIDRES        1.953125 Hz
AQ            0.2560500 sec
RG            208.5
DW            125.000 usec
DE            10.00 usec
TE            297.0 K
D0            0.00011036 sec
D1            1.99385595 sec
D8            0.30000001 sec
D11           0.03000000 sec
D12           0.00002000 sec
D16           0.00020000 sec
IN0           0.00025000 sec
    
```

```

===== CHANNEL f1 =====
SF01         400.1318006 MHz
NUC1          1H
P1            11.50 usec
P2            23.00 usec
P17           2500.00 usec
ND0           1
TD            256
SF01         400.1318 MHz
FIDRES        15.625000 Hz
SW            9.997 ppm
FnMODE        States-TPPI
SI            1024
SF            400.1300063 MHz
WDW           QSINE
SSB           2
LB            0.00 Hz
GB            0
PC            1.00
SI            1024
MC2           States-TPPI
SF            400.1300063 MHz
WDW           QSINE
SSB           2
LB            0.00 Hz
GB            0
    
```

# NOESY spectrum of Krishnolide C (**3**) in CDCl<sub>3</sub>

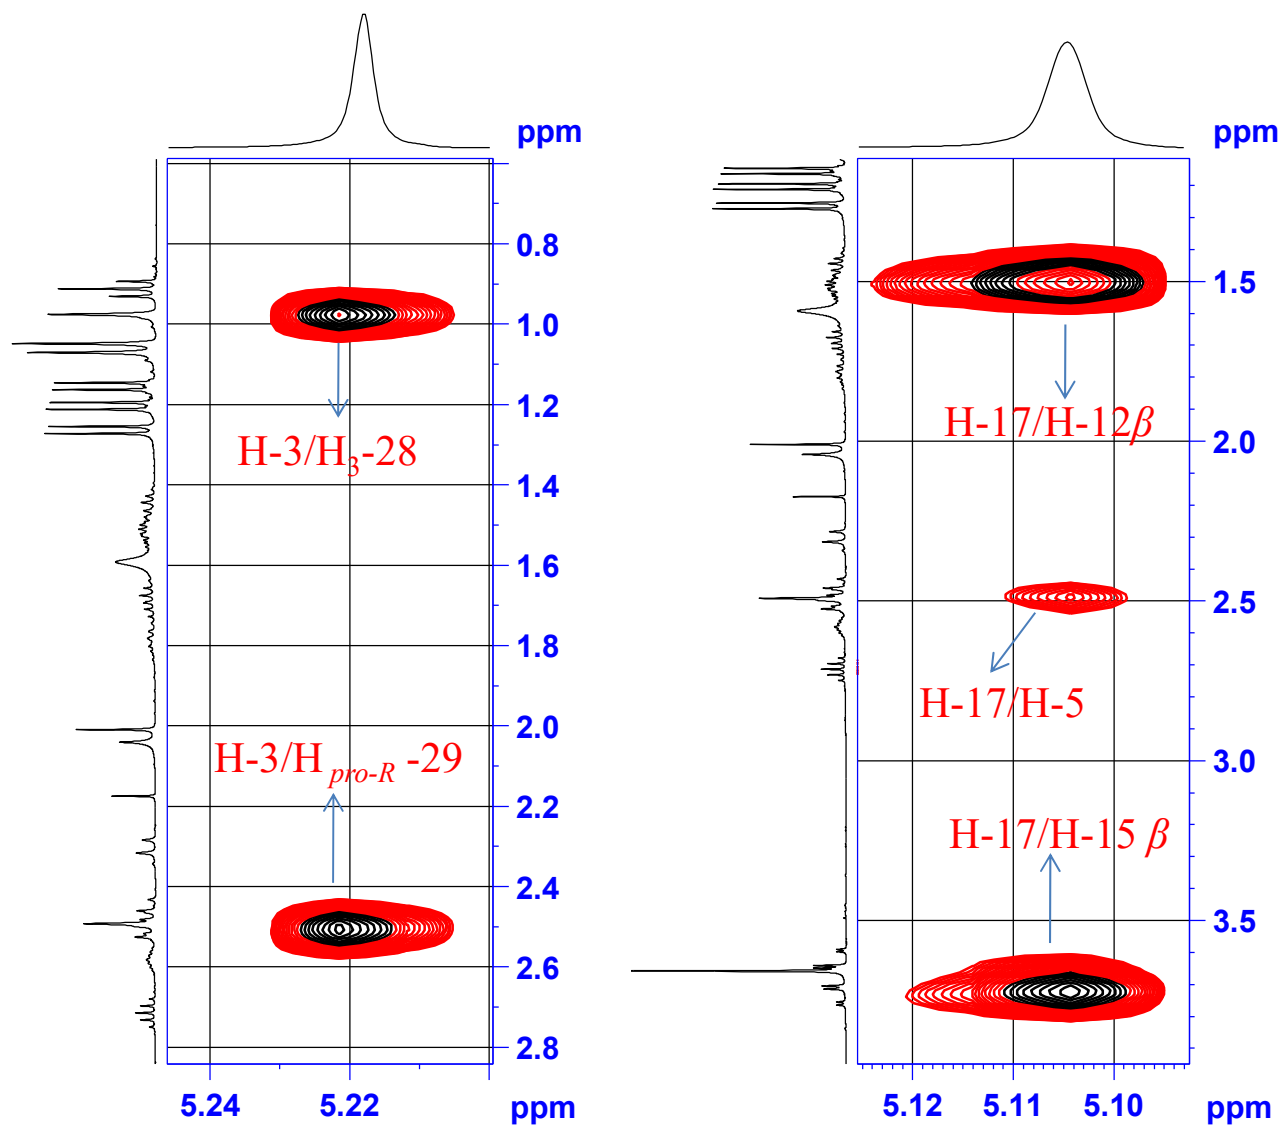



NOESY spectrum of Krishnolide C (**3**) in CDCl<sub>3</sub>

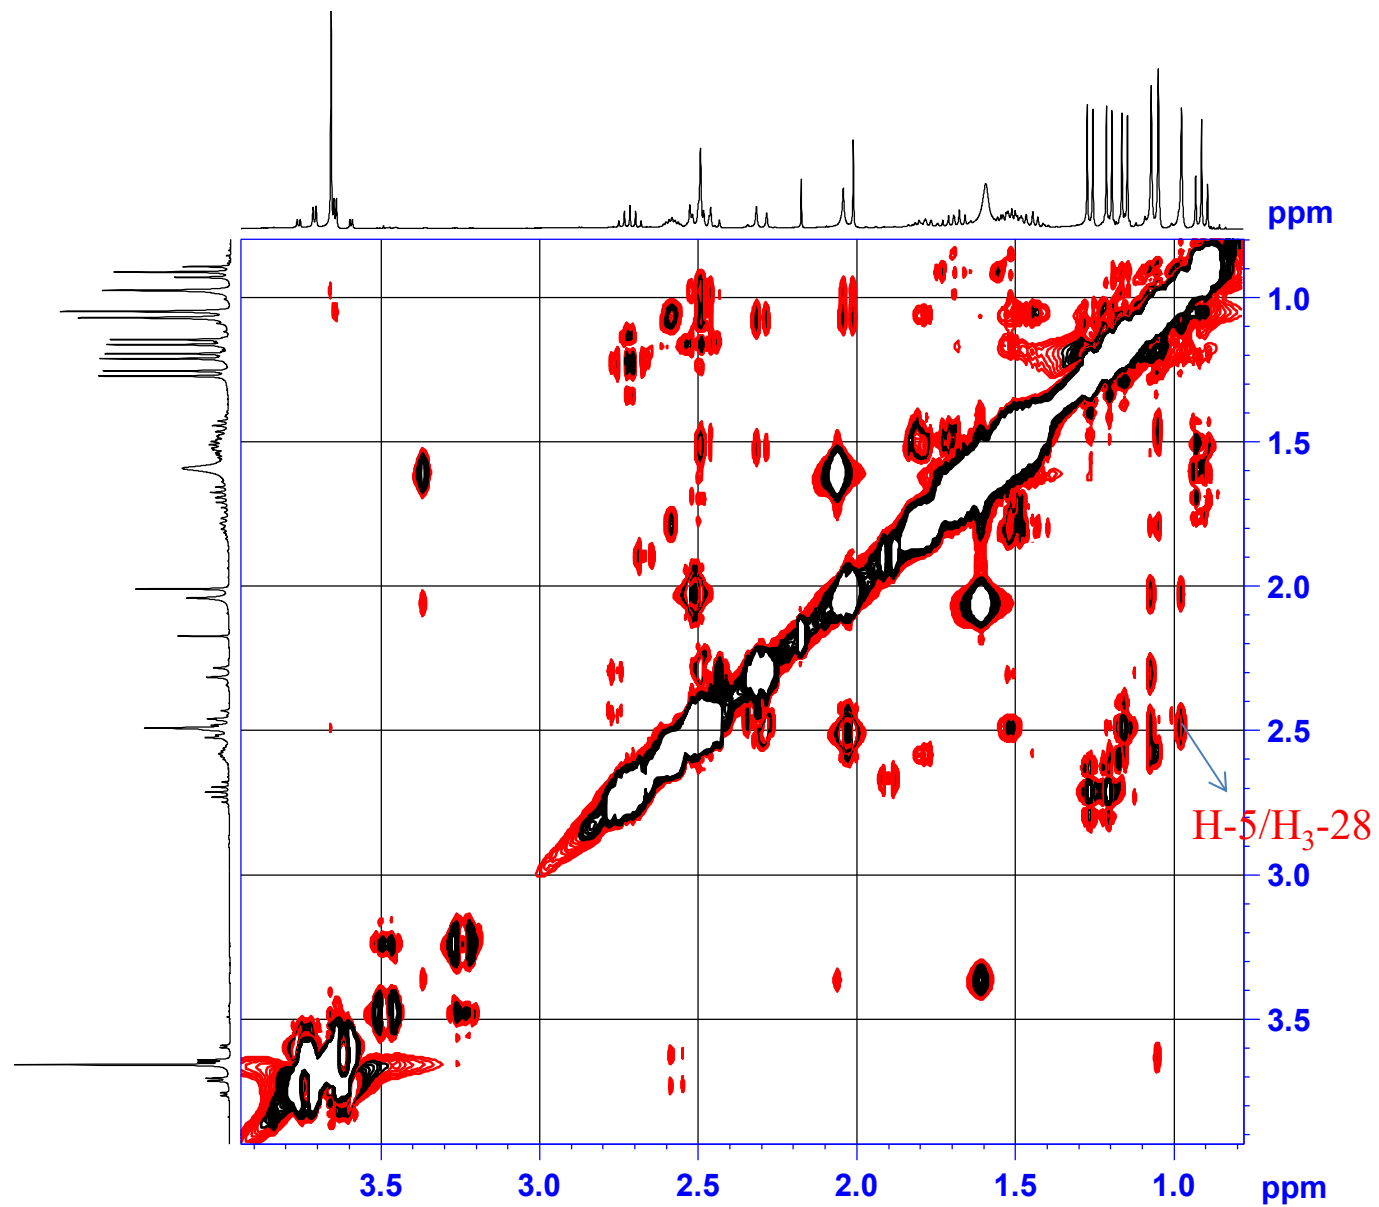

NOESY spectrum of Krishnolide C (**3**) in CDCl<sub>3</sub>

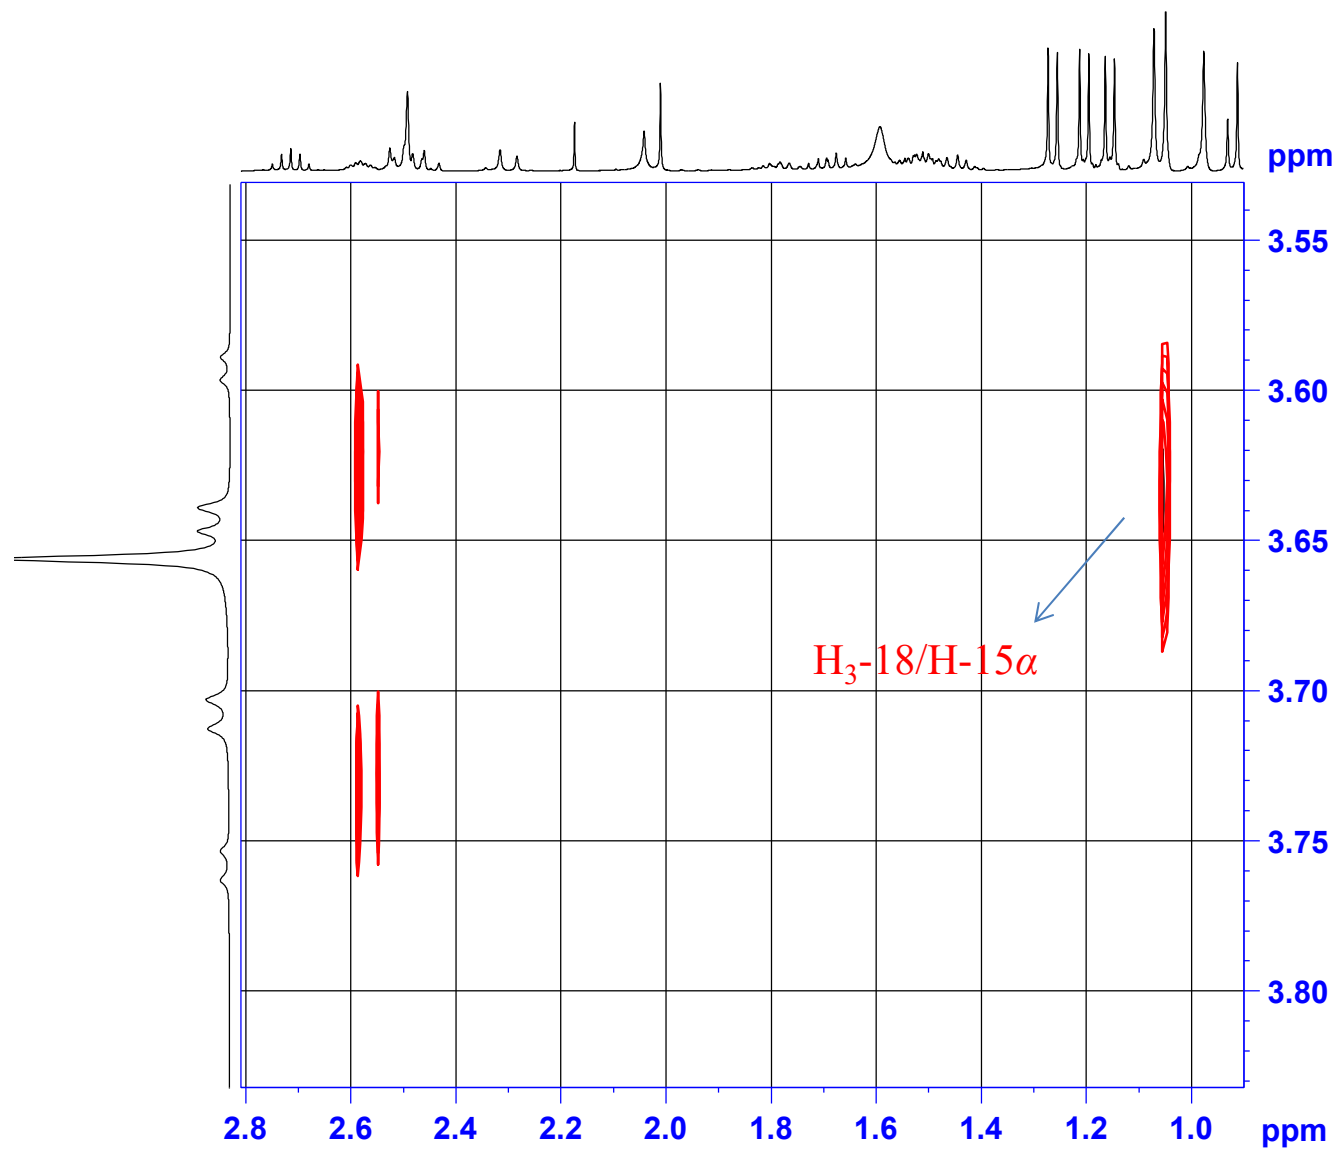

NOESY spectrum of Krishnolide C (**3**) in CDCl<sub>3</sub>

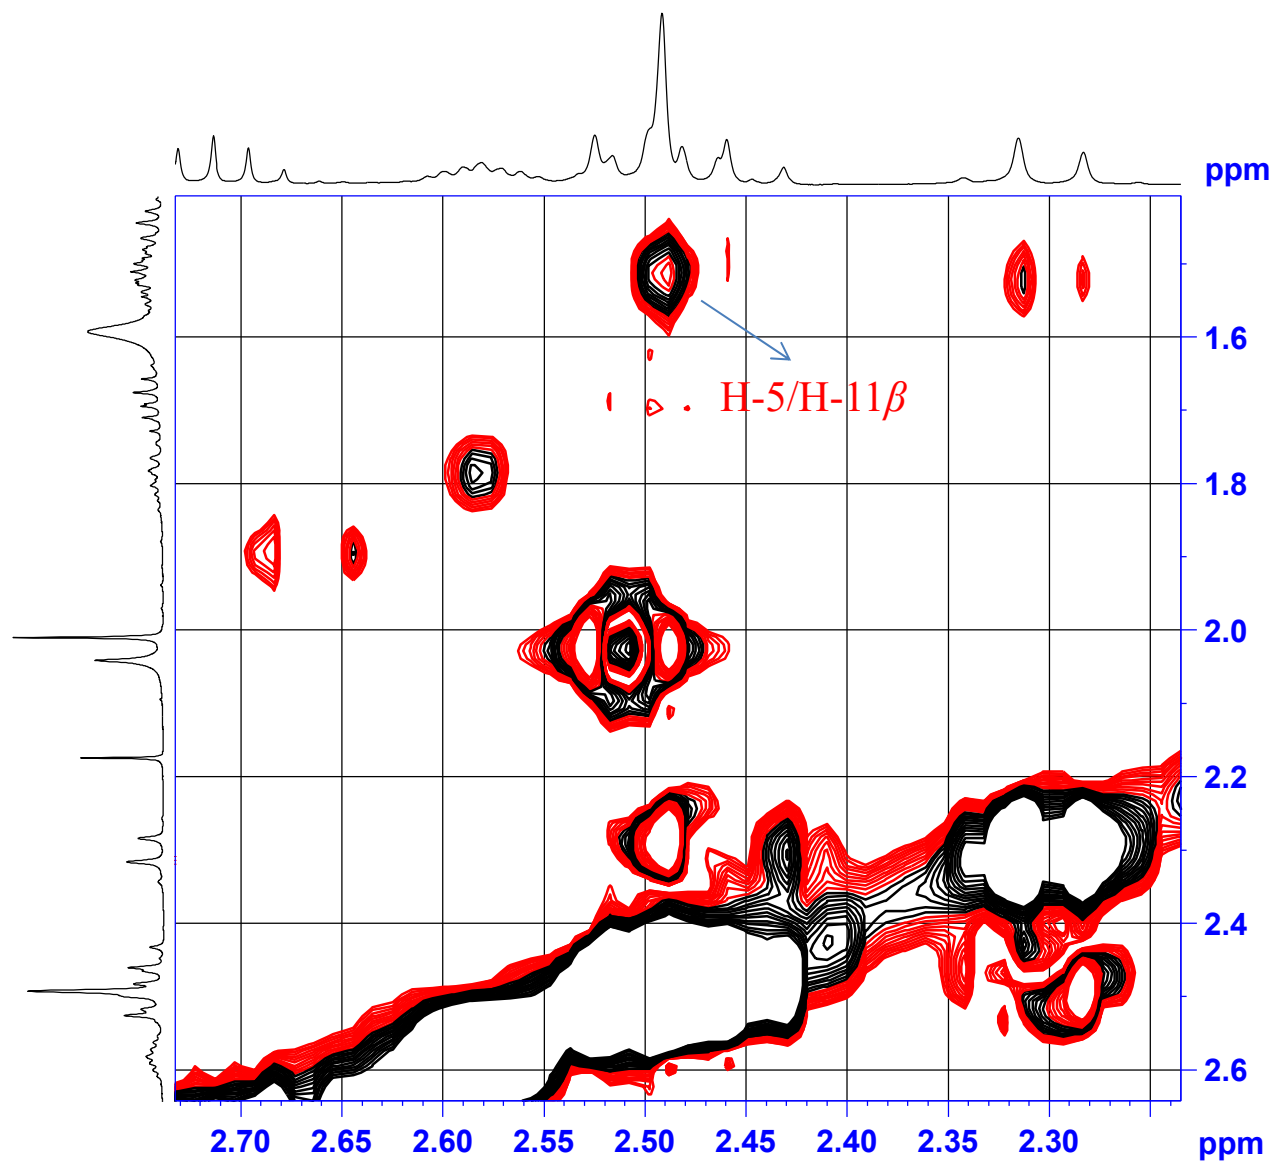

NOESY spectrum of Krishnolide C (**3**) in CDCl<sub>3</sub>

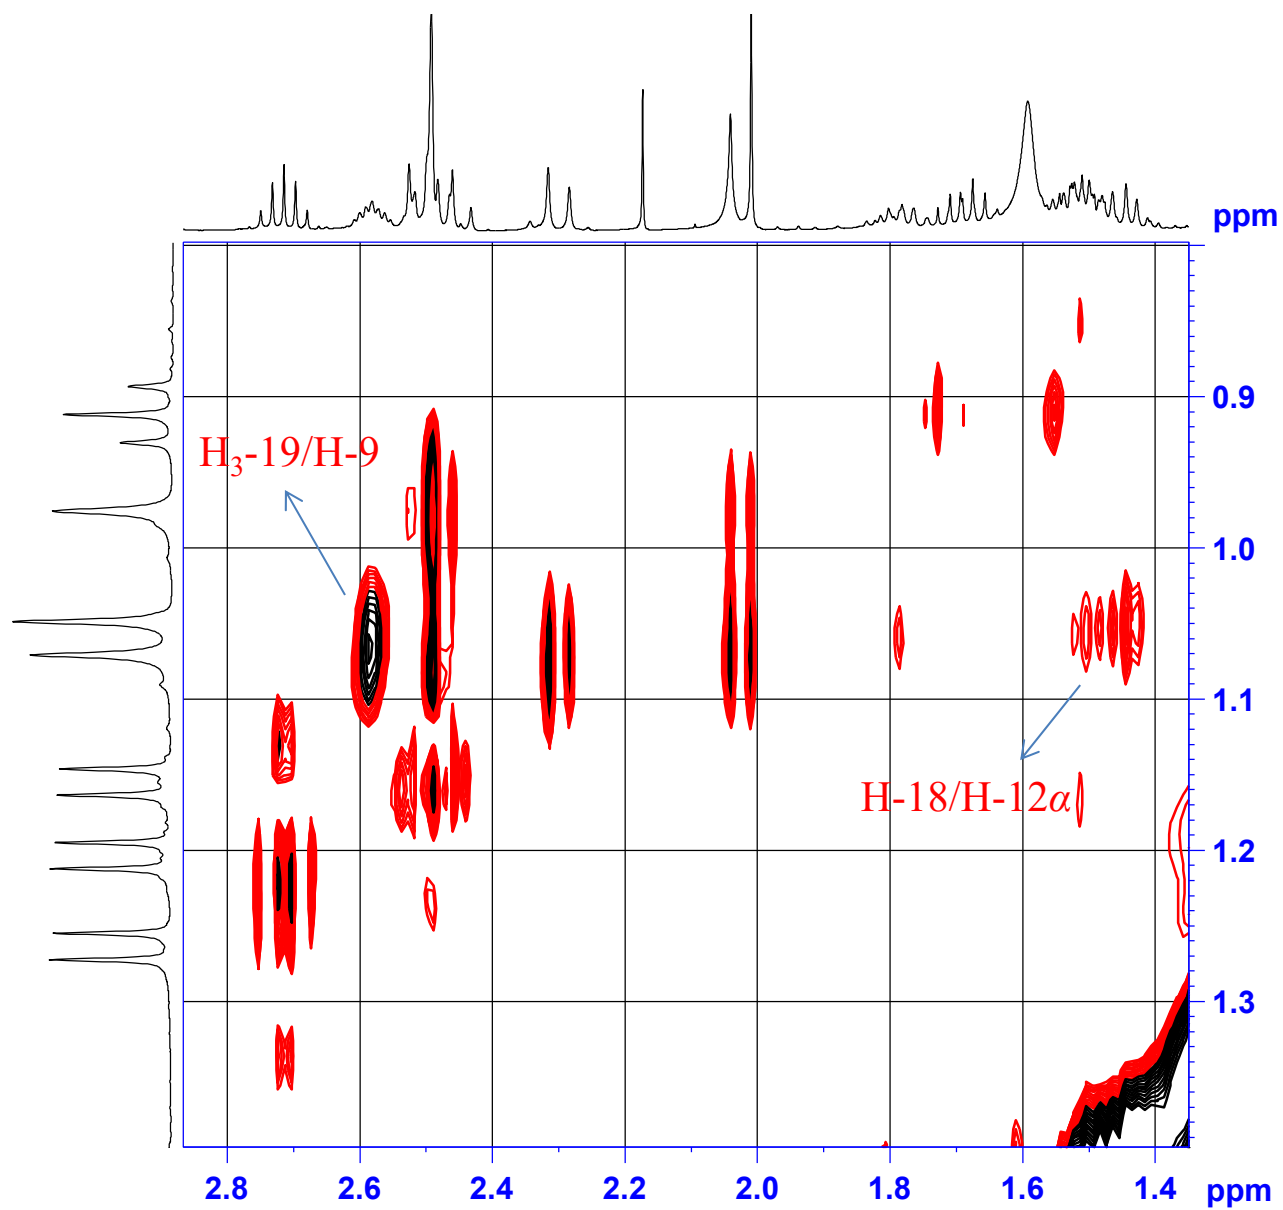

# HR-ESIMS of Krishnolide D (4)

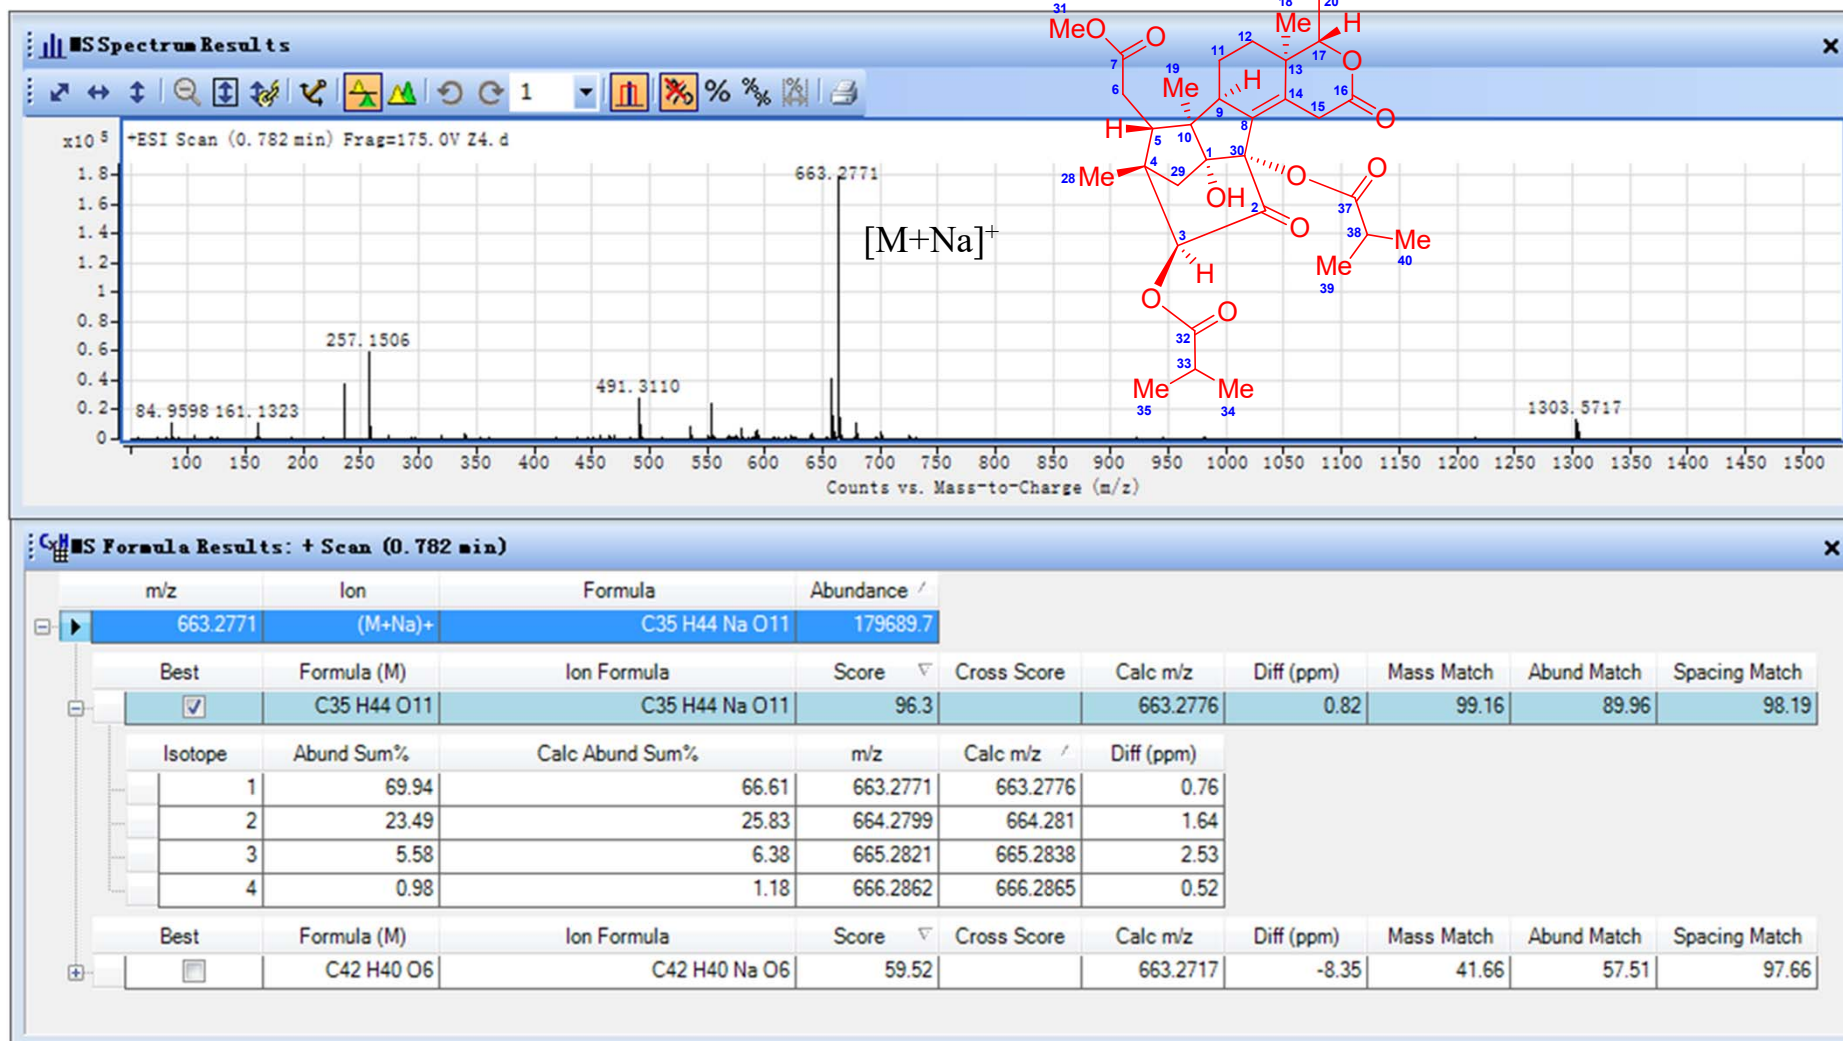

# UV spectrum of Krishnolide D (4) in MeCN

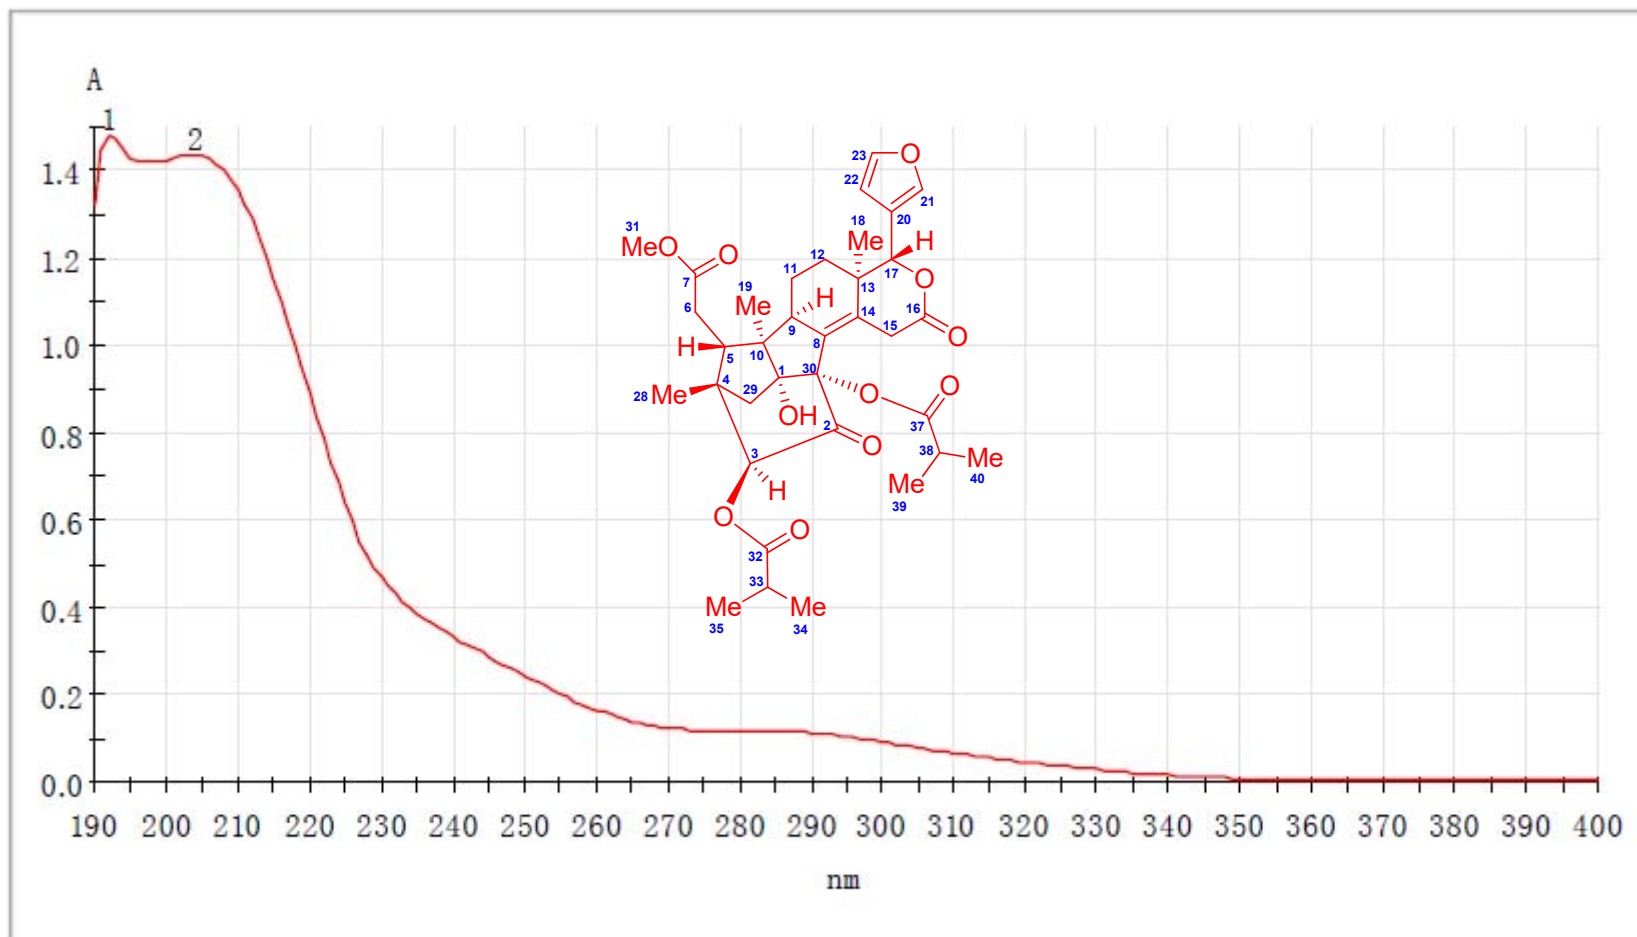

zq-24-1.dsp

# <sup>1</sup>H NMR (400 MHz) spectrum of Krishnolide D (4) in CDCl<sub>3</sub>

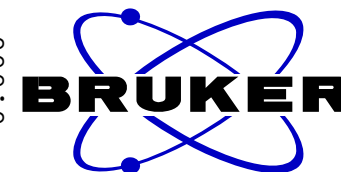

7.473  
7.428  
7.424  
7.420  
7.264  
6.425  
6.422  
5.205  
5.133  
3.717  
3.708  
3.655  
2.734  
2.716  
2.699  
2.670  
2.652  
2.635  
2.515  
2.483  
2.457  
2.314  
2.174  
2.059  
2.044  
2.012  
1.589  
1.518  
1.505  
1.488  
1.442  
1.273  
1.256  
1.213  
1.208  
1.195  
1.190  
1.177  
1.070  
1.051  
0.979  
0.000

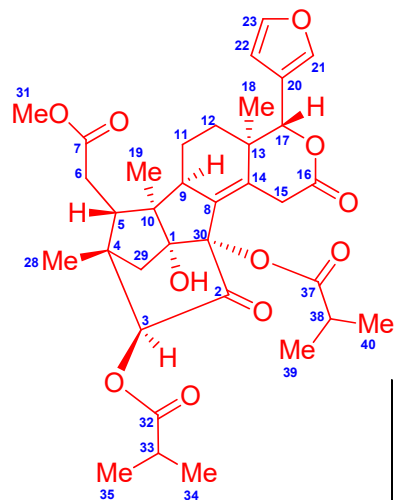

```

NAME          ZQ-24-1
EXPNO         1
PROCNO        1
Date_         20170330
Time          22.21
INSTRUM       spect
PROBHD        5 mm CPPBBO BB
PULPROG       zg30
TD            65536
SOLVENT       CDCl3
NS            16
DS            2
SWH           8223.685 Hz
FIDRES        0.125483 Hz
AQ            3.9846387 sec
RG            208.5
DW            60.800 usec
DE            10.00 usec
TE            297.0 K
D1            1.0000000 sec
TD0           1
    
```

```

===== CHANNEL f1 =====
SFO1          400.1324710 MHz
NUC1          1H
P1            11.50 usec
SI            65536
SF            400.1300082 MHz
WDW           EM
SSB           0
LB            0.30 Hz
GB            0
PC            1.00
    
```

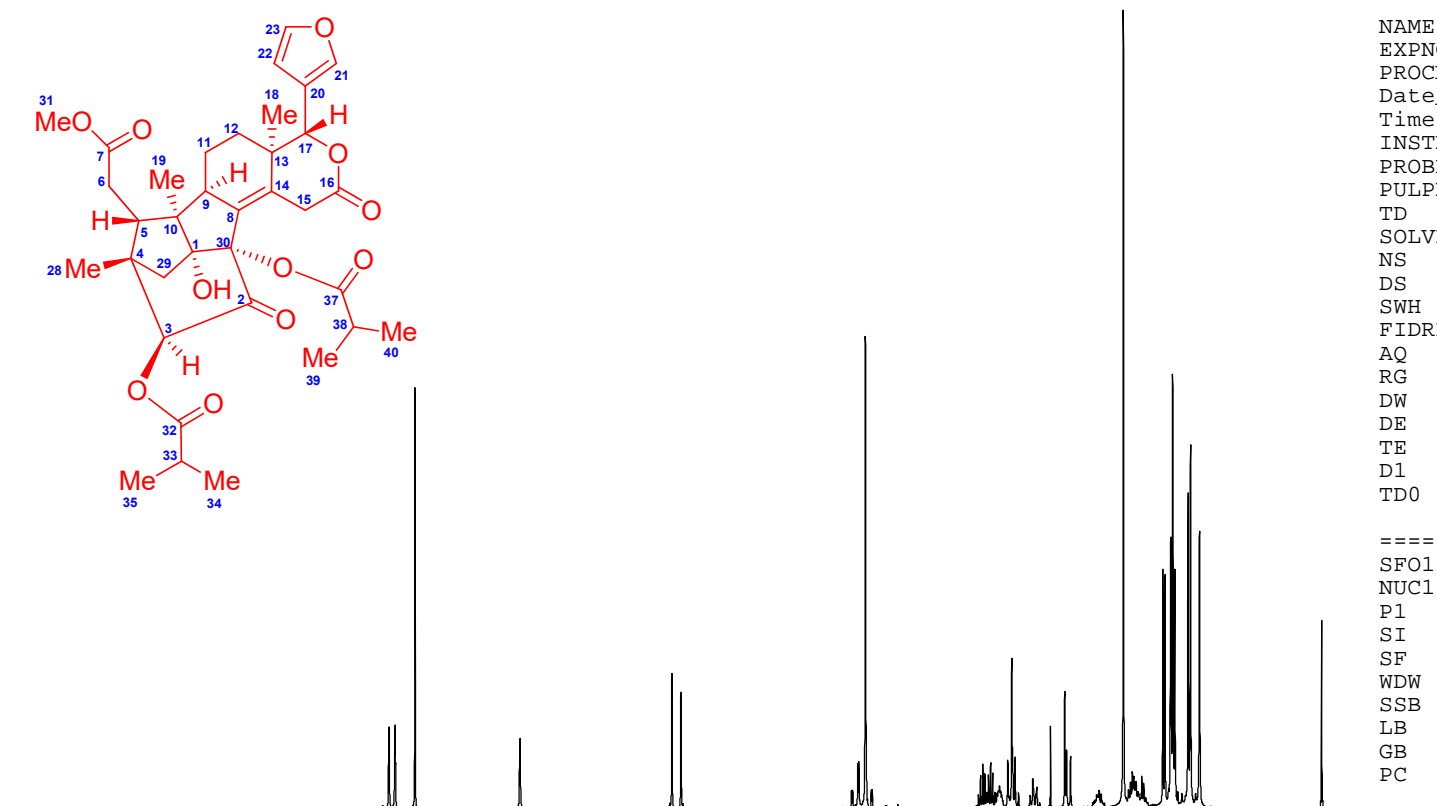

10 9 8 7 6 5 4 3 2 1 0 ppm

1.08  
1.06  
1.08  
1.00  
1.06  
1.16  
3.06  
1.03  
1.09  
1.29  
1.20  
3.09  
1.23  
0.51  
1.01  
1.11  
1.31  
2.12  
1.24  
3.14  
3.14  
3.03  
3.11  
2.95  
3.11  
3.03





<sup>1</sup>H NMR (400 MHz) spectrum of Krishnolide D (4) in CDCl<sub>3</sub>

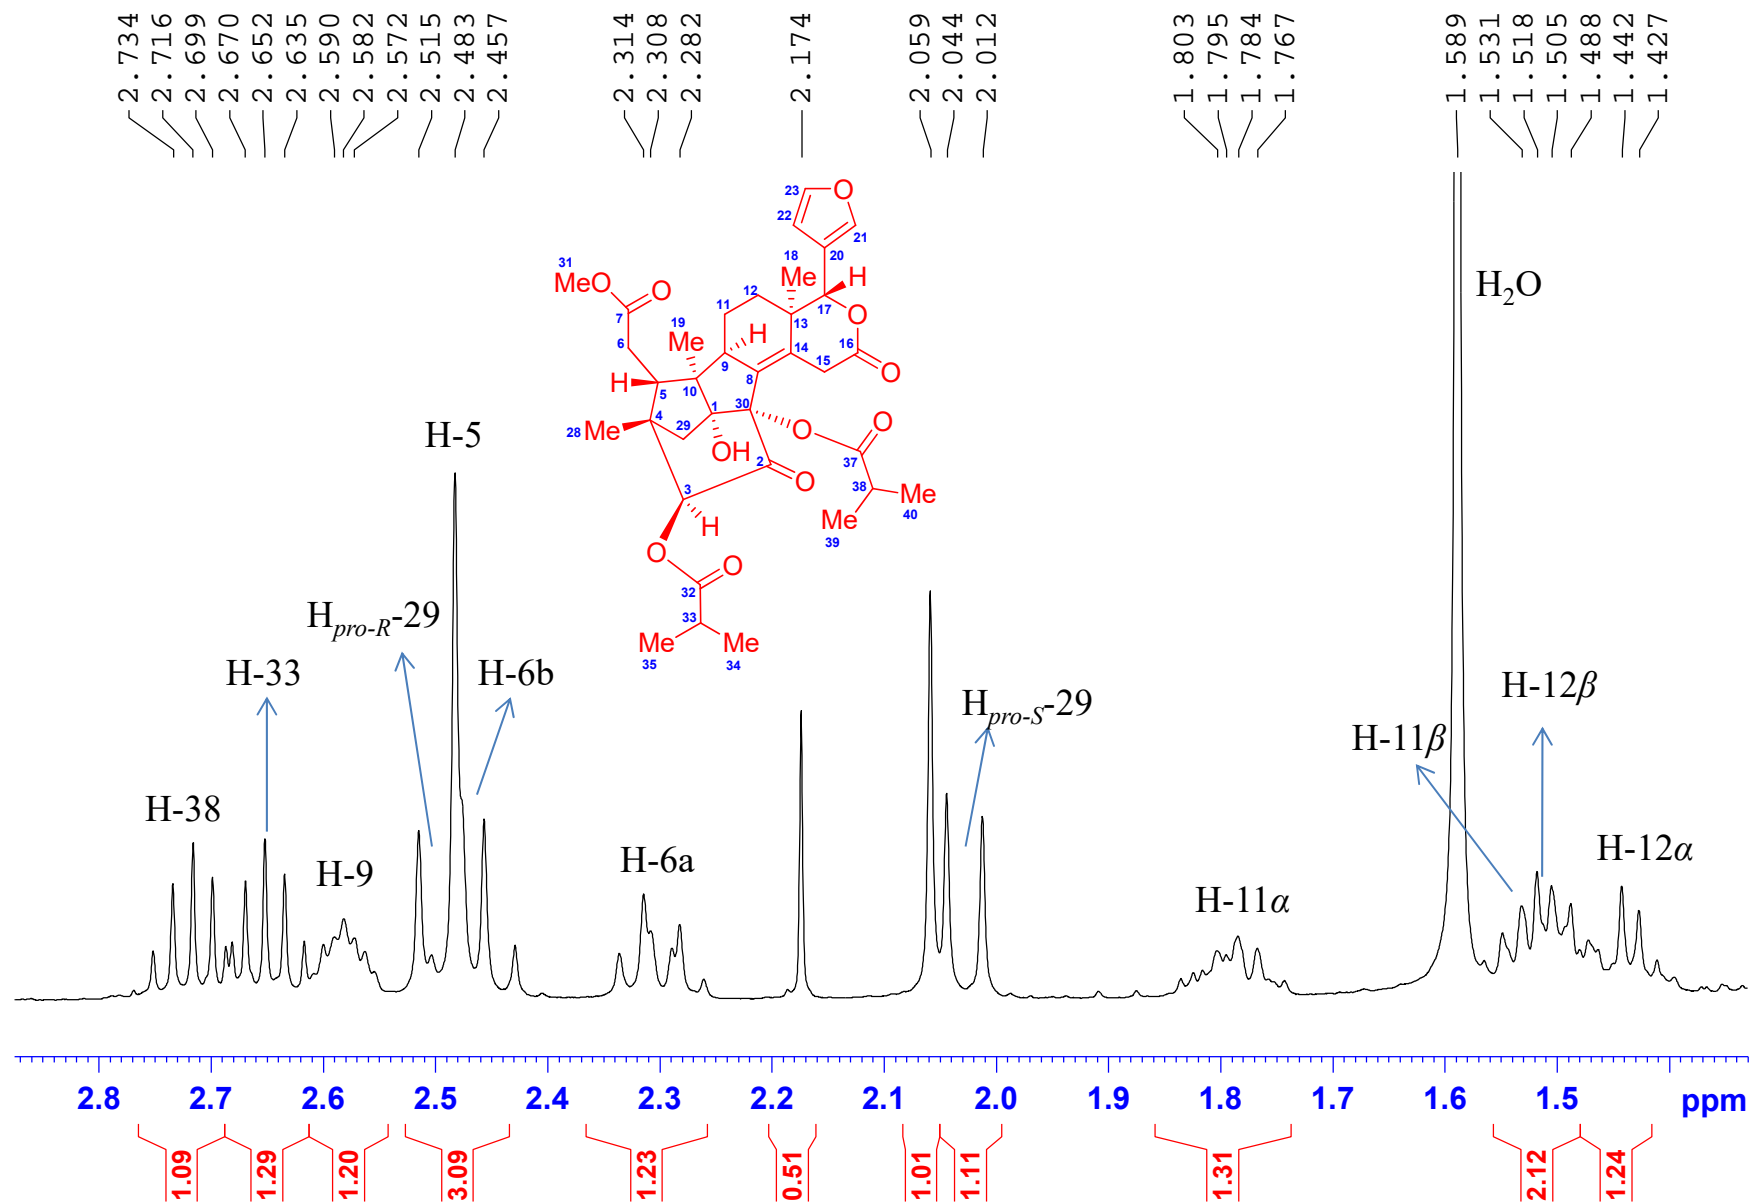

$^1\text{H}$  NMR (400 MHz) spectrum of Krishnolide D (**4**) in  $\text{CDCl}_3$

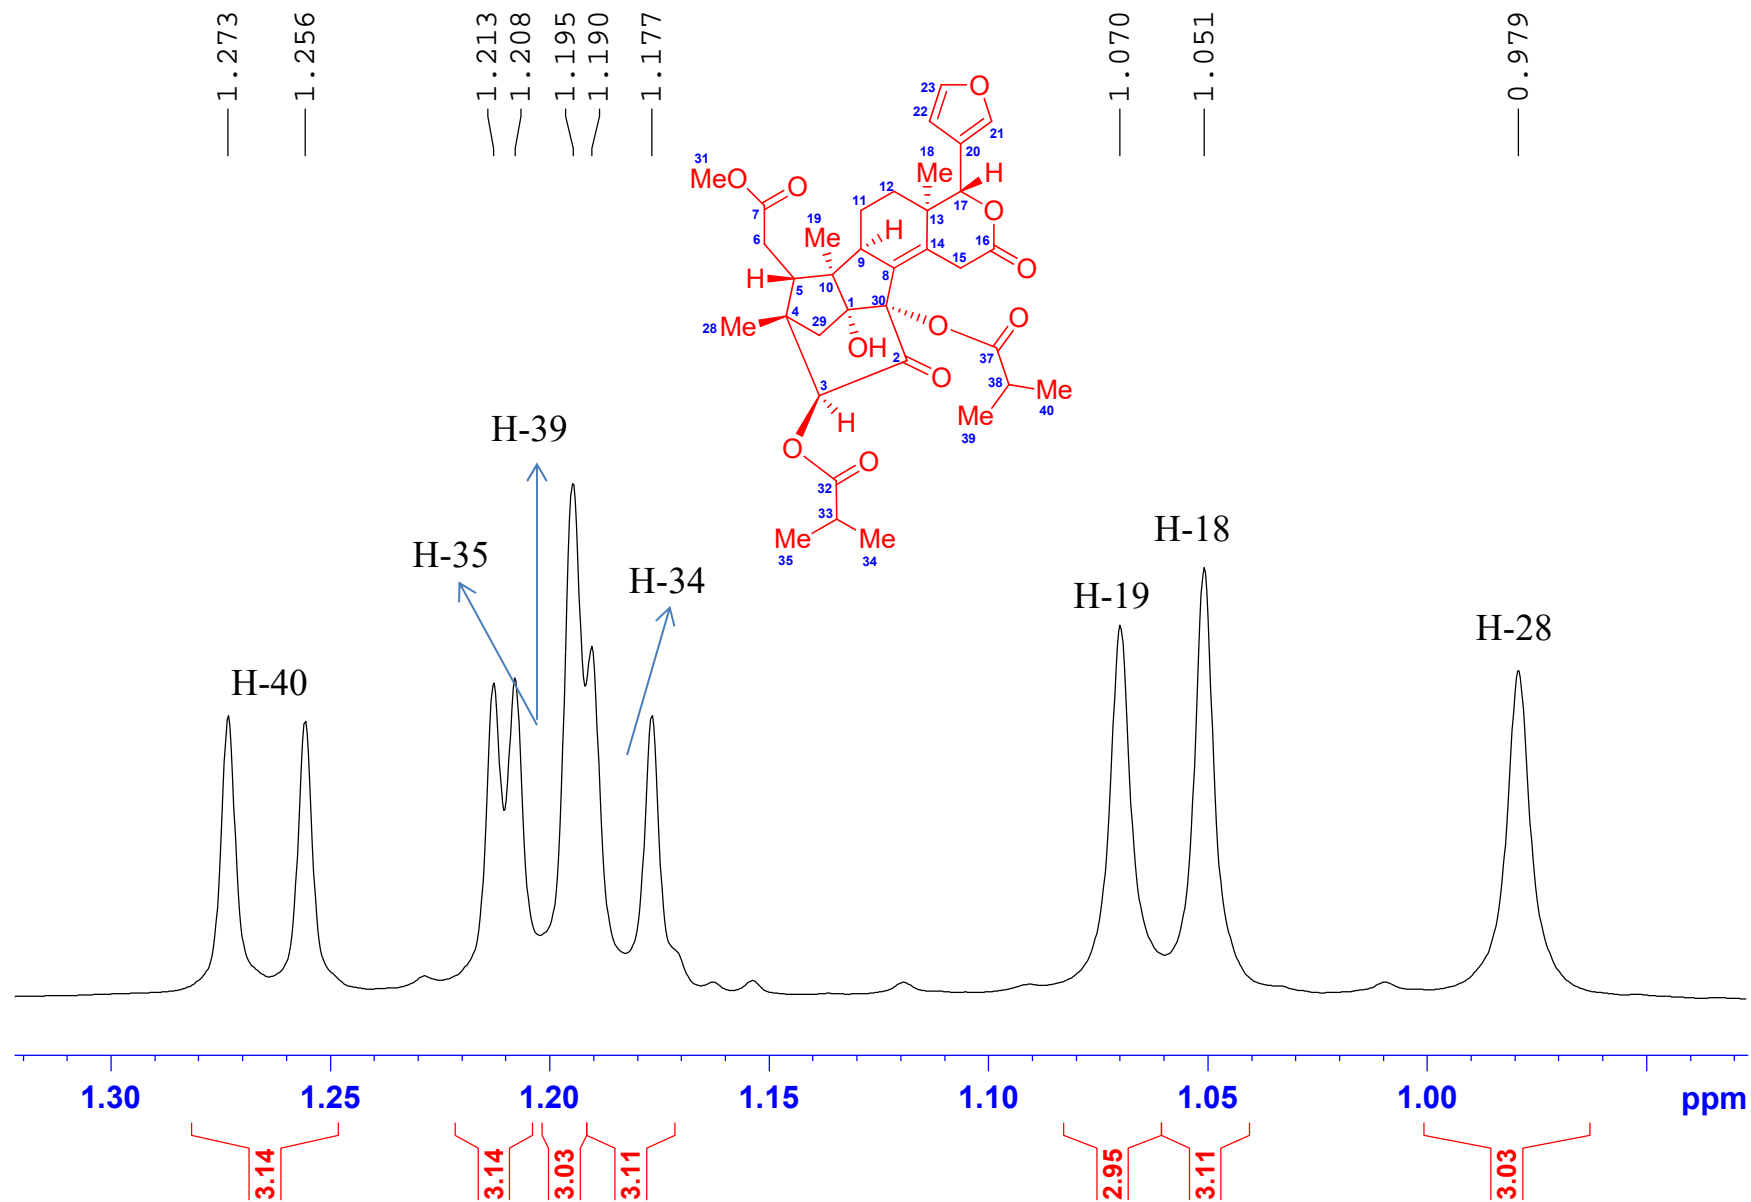

<sup>13</sup>C NMR (100 MHz) spectrum of Krishnolide D (4) in CDCl<sub>3</sub>

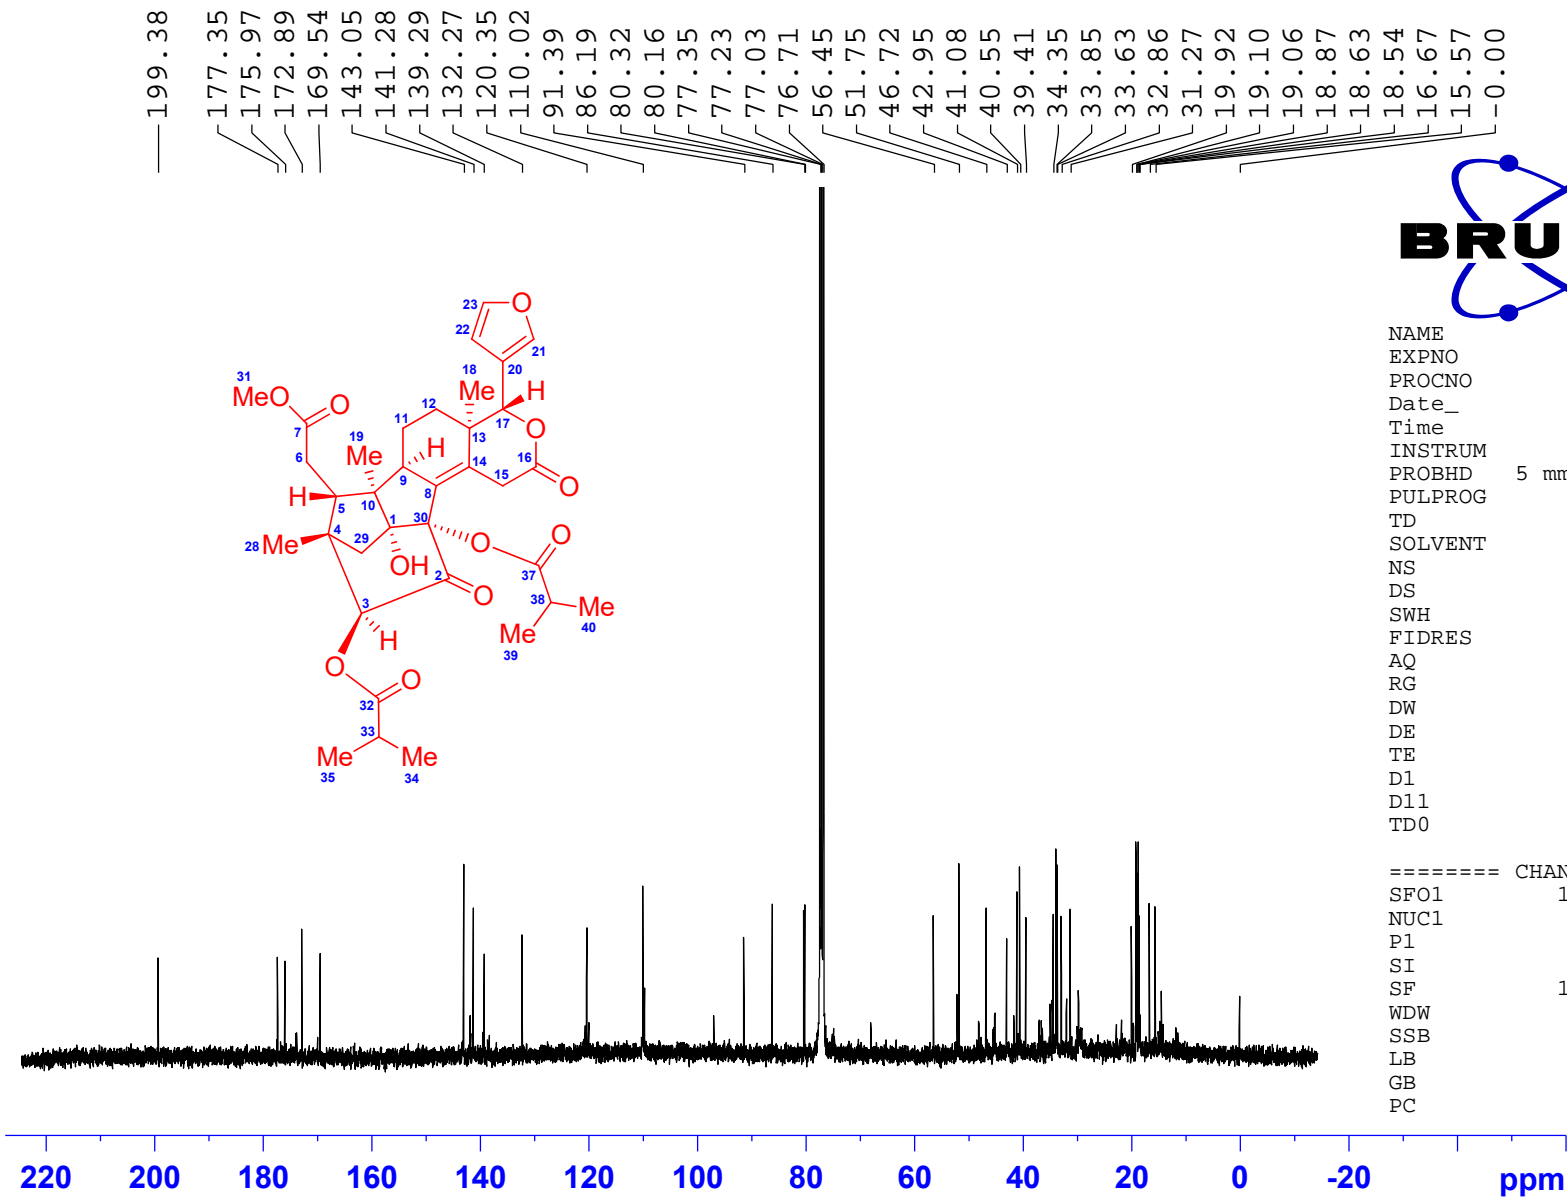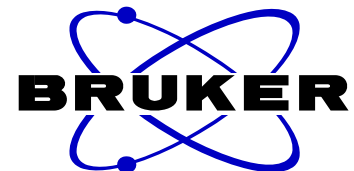

```

NAME           ZQ-24-1
EXPNO          2
PROCNO         1
Date_          20170331
Time           8.12
INSTRUM        spect
PROBHD         5 mm CPPBBO BB
PULPROG        zgpg30
TD             65536
SOLVENT        CDCl3
NS             1024
DS             4
SWH            24038.461 Hz
FIDRES         0.366798 Hz
AQ            1.3631988 sec
RG            147.94
DW            20.800 usec
DE            18.00 usec
TE            297.0 K
D1            2.00000000 sec
D11           0.03000000 sec
TD0           1
    
```

```

===== CHANNEL f1 =====
SFO1          100.623324 MHz
NUC1          13C
P1            10.00 usec
SI            32768
SF            100.6127690 MHz
WDW           EM
SSB           0
LB            1.00 Hz
GB            0
PC            1.40
    
```

<sup>13</sup>C NMR (100 MHz) spectrum of Krishnolide D (4) in CDCl<sub>3</sub>

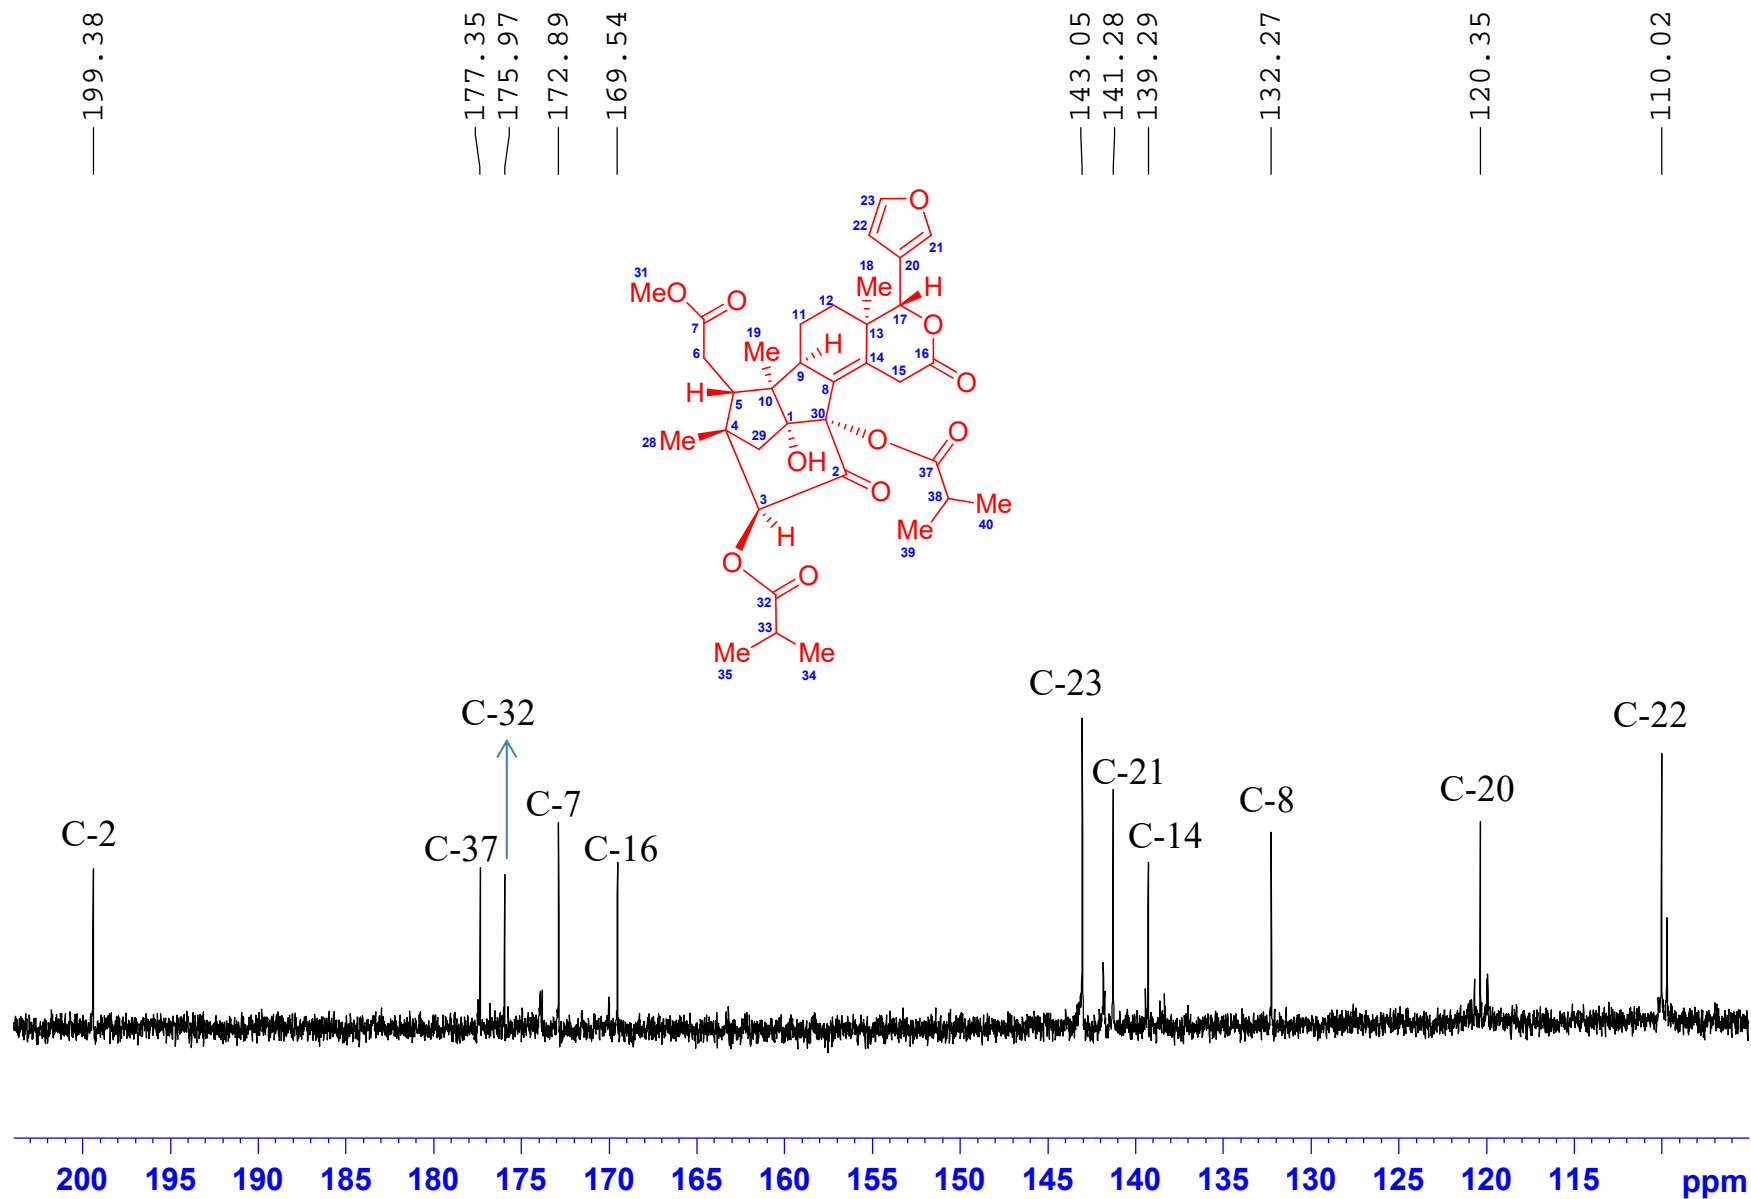

$^{13}\text{C}$  NMR (100 MHz) spectrum of Krishnolide D (4) in  $\text{CDCl}_3$

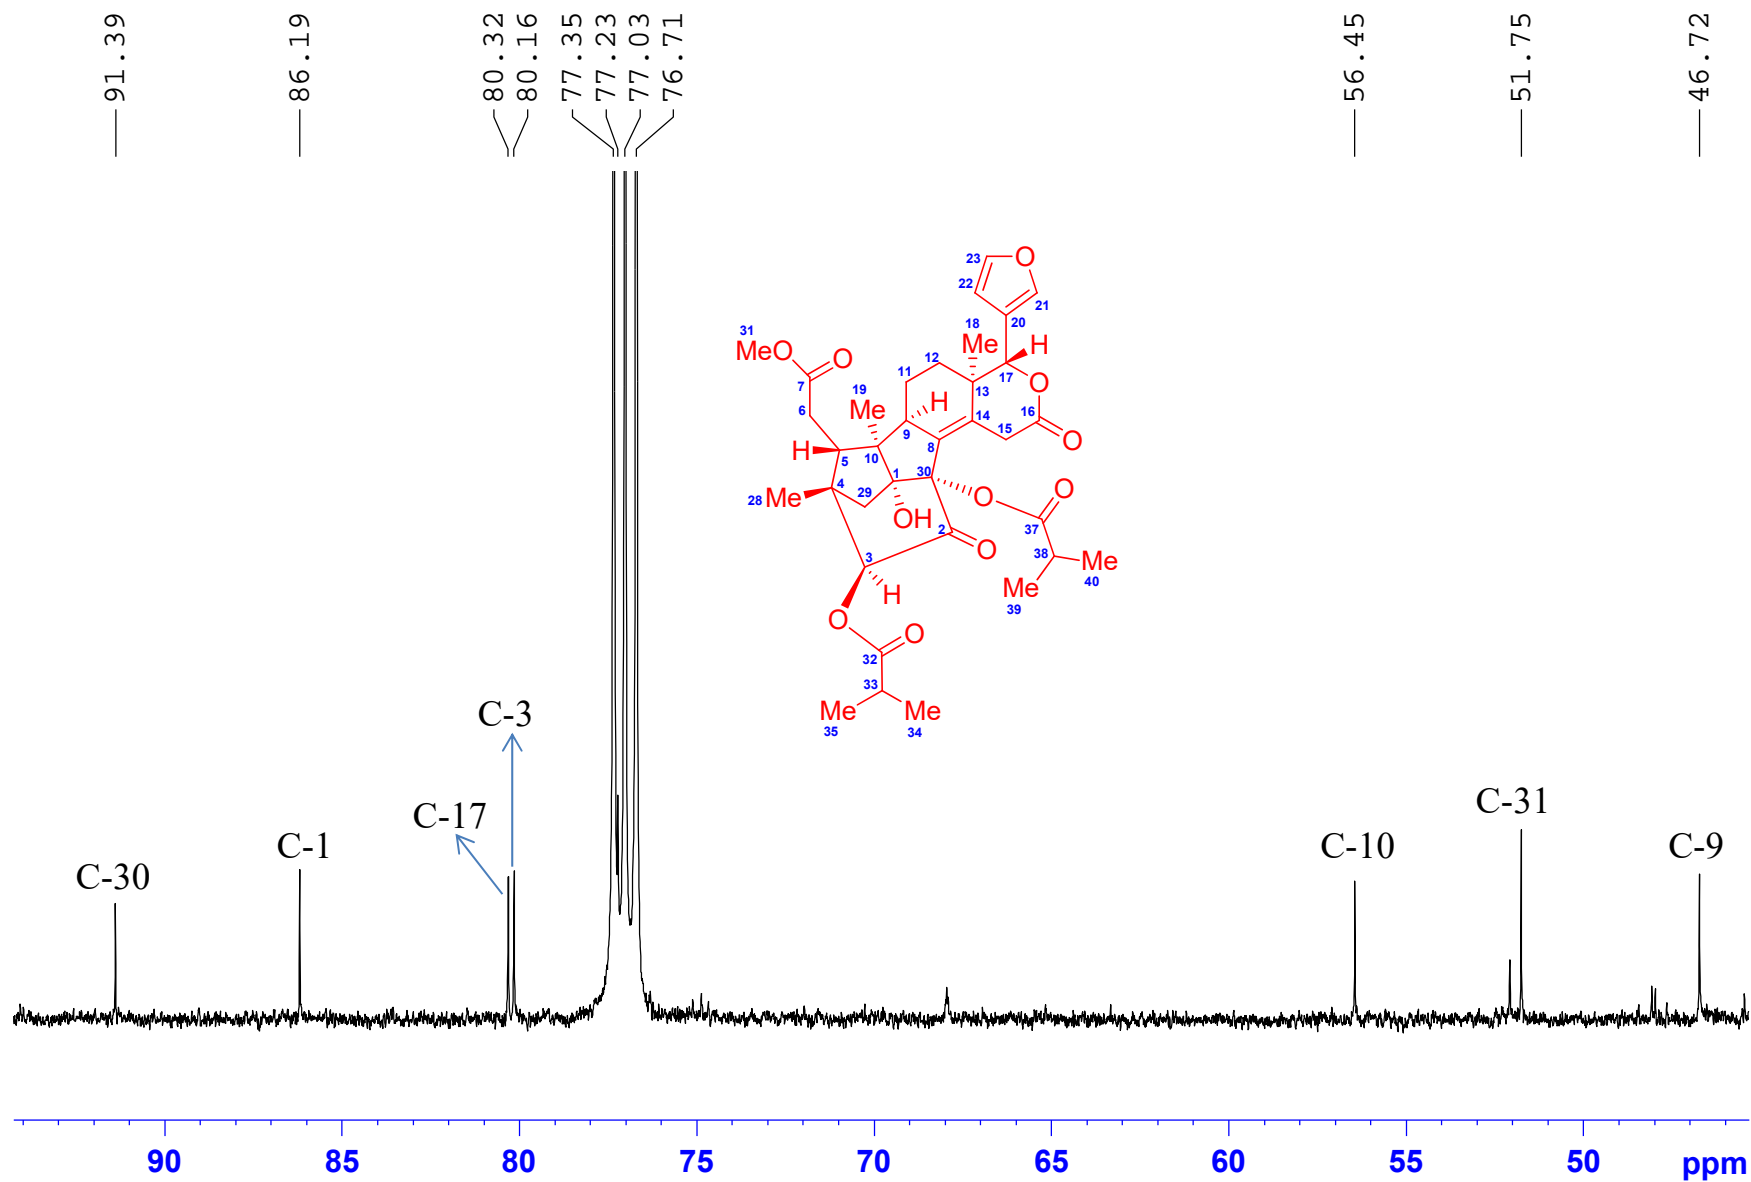

$^{13}\text{C}$  NMR (100 MHz) spectrum of Krishnolide D (4) in  $\text{CDCl}_3$

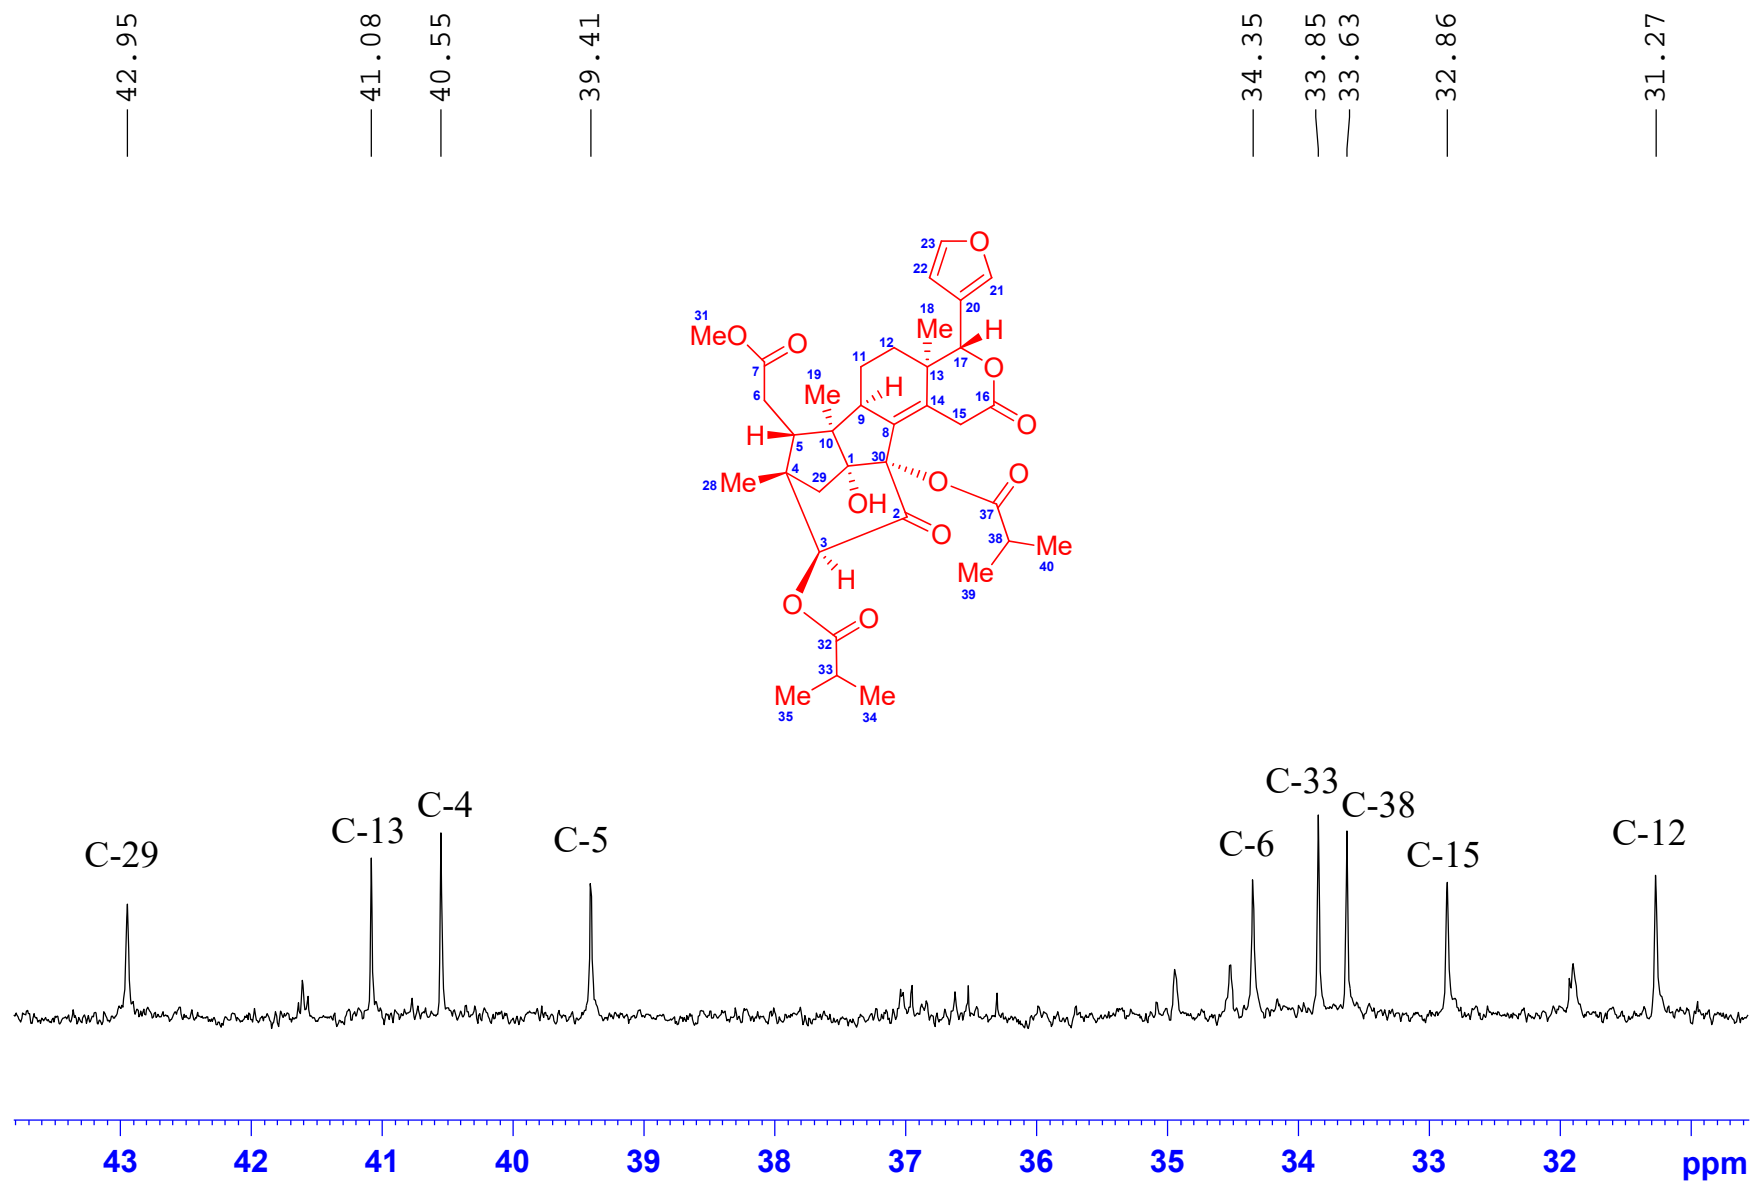

$^{13}\text{C}$  NMR (100 MHz) spectrum of Krishnolide D (4) in  $\text{CDCl}_3$

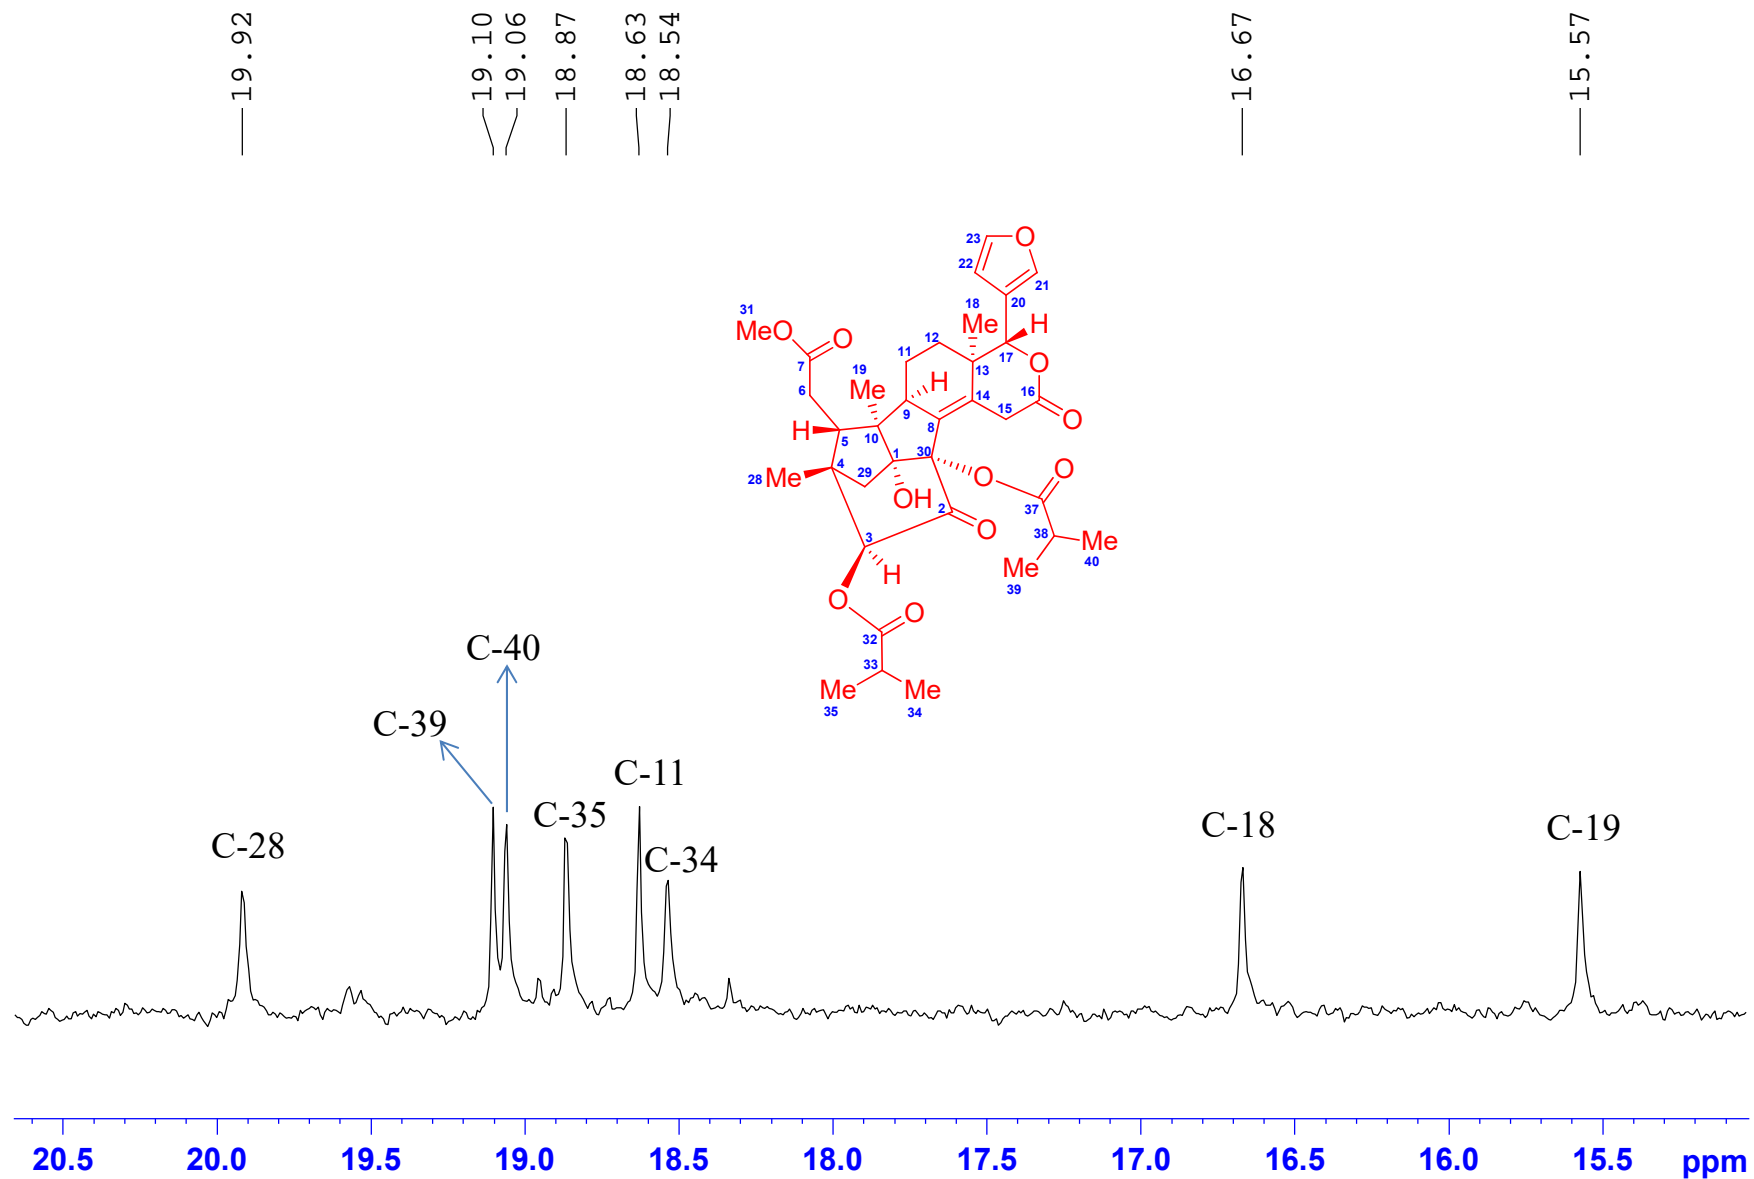

# DEPT 135 spectrum of Krishnolide D (4) in CDCl<sub>3</sub>

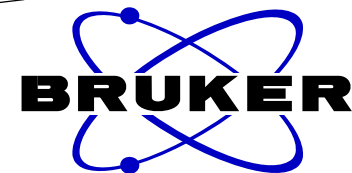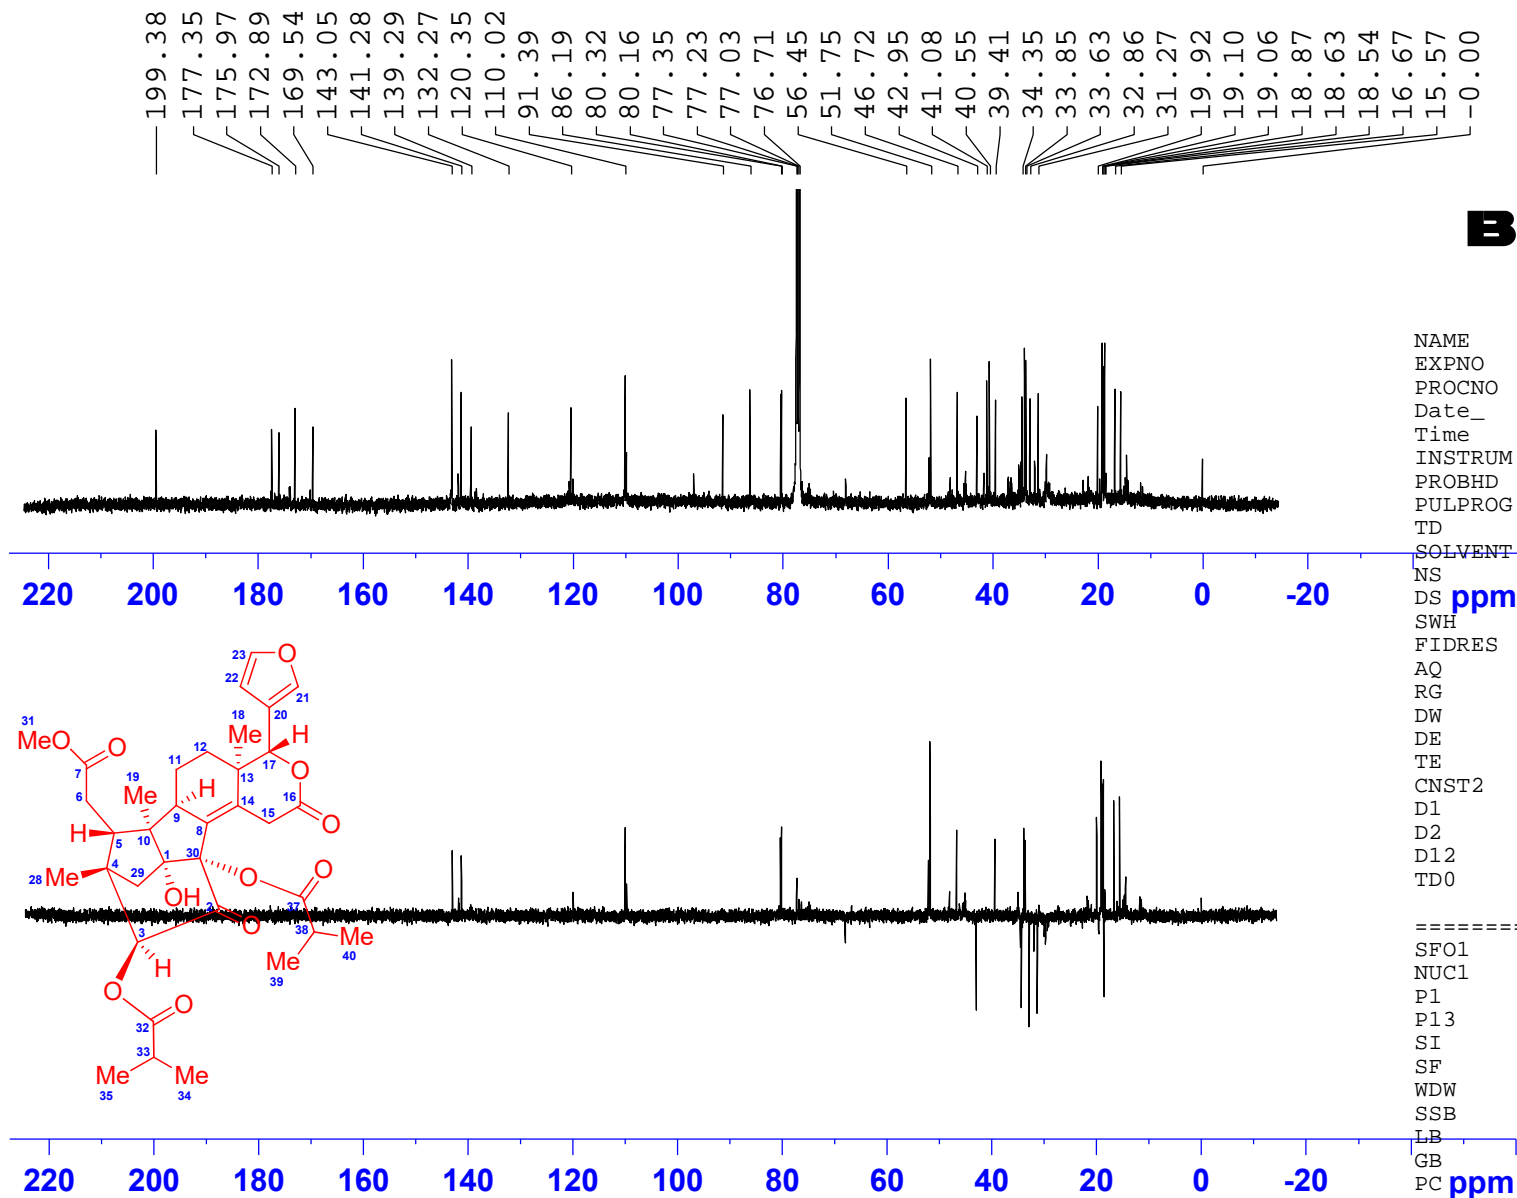

```

NAME          ZQ-24-1
EXPNO         3
PROCNO        1
Date_         20170331
Time          8.30
INSTRUM       spect
PROBHD        5 mm CPPBBO BB
PULPROG       deptsp135
TD            65536
SOLVENT       CDCl3
NS            300
DS            4
SWH           24038.461 Hz
FIDRES        0.366798 Hz
AQ            1.3631988 sec
RG            130.26
DW            20.800 usec
DE            18.00 usec
TE            297.0 K
CNST2         145.000000
D1            2.00000000 sec
D2            0.00344828 sec
D12           0.00002000 sec
TD0           1

===== CHANNEL f1 =====
SF01          100.6233324 MHz
NUC1           13C
P1            10.00 usec
P13           2000.00 usec
SI            32768
SF            100.6127690 MHz
WDW           EM
SSB           0
LB            1.00 Hz
GB            0
PC            1.40
    
```



DEPT 135 spectrum of Krishnolide D (4) in CDCl<sub>3</sub>

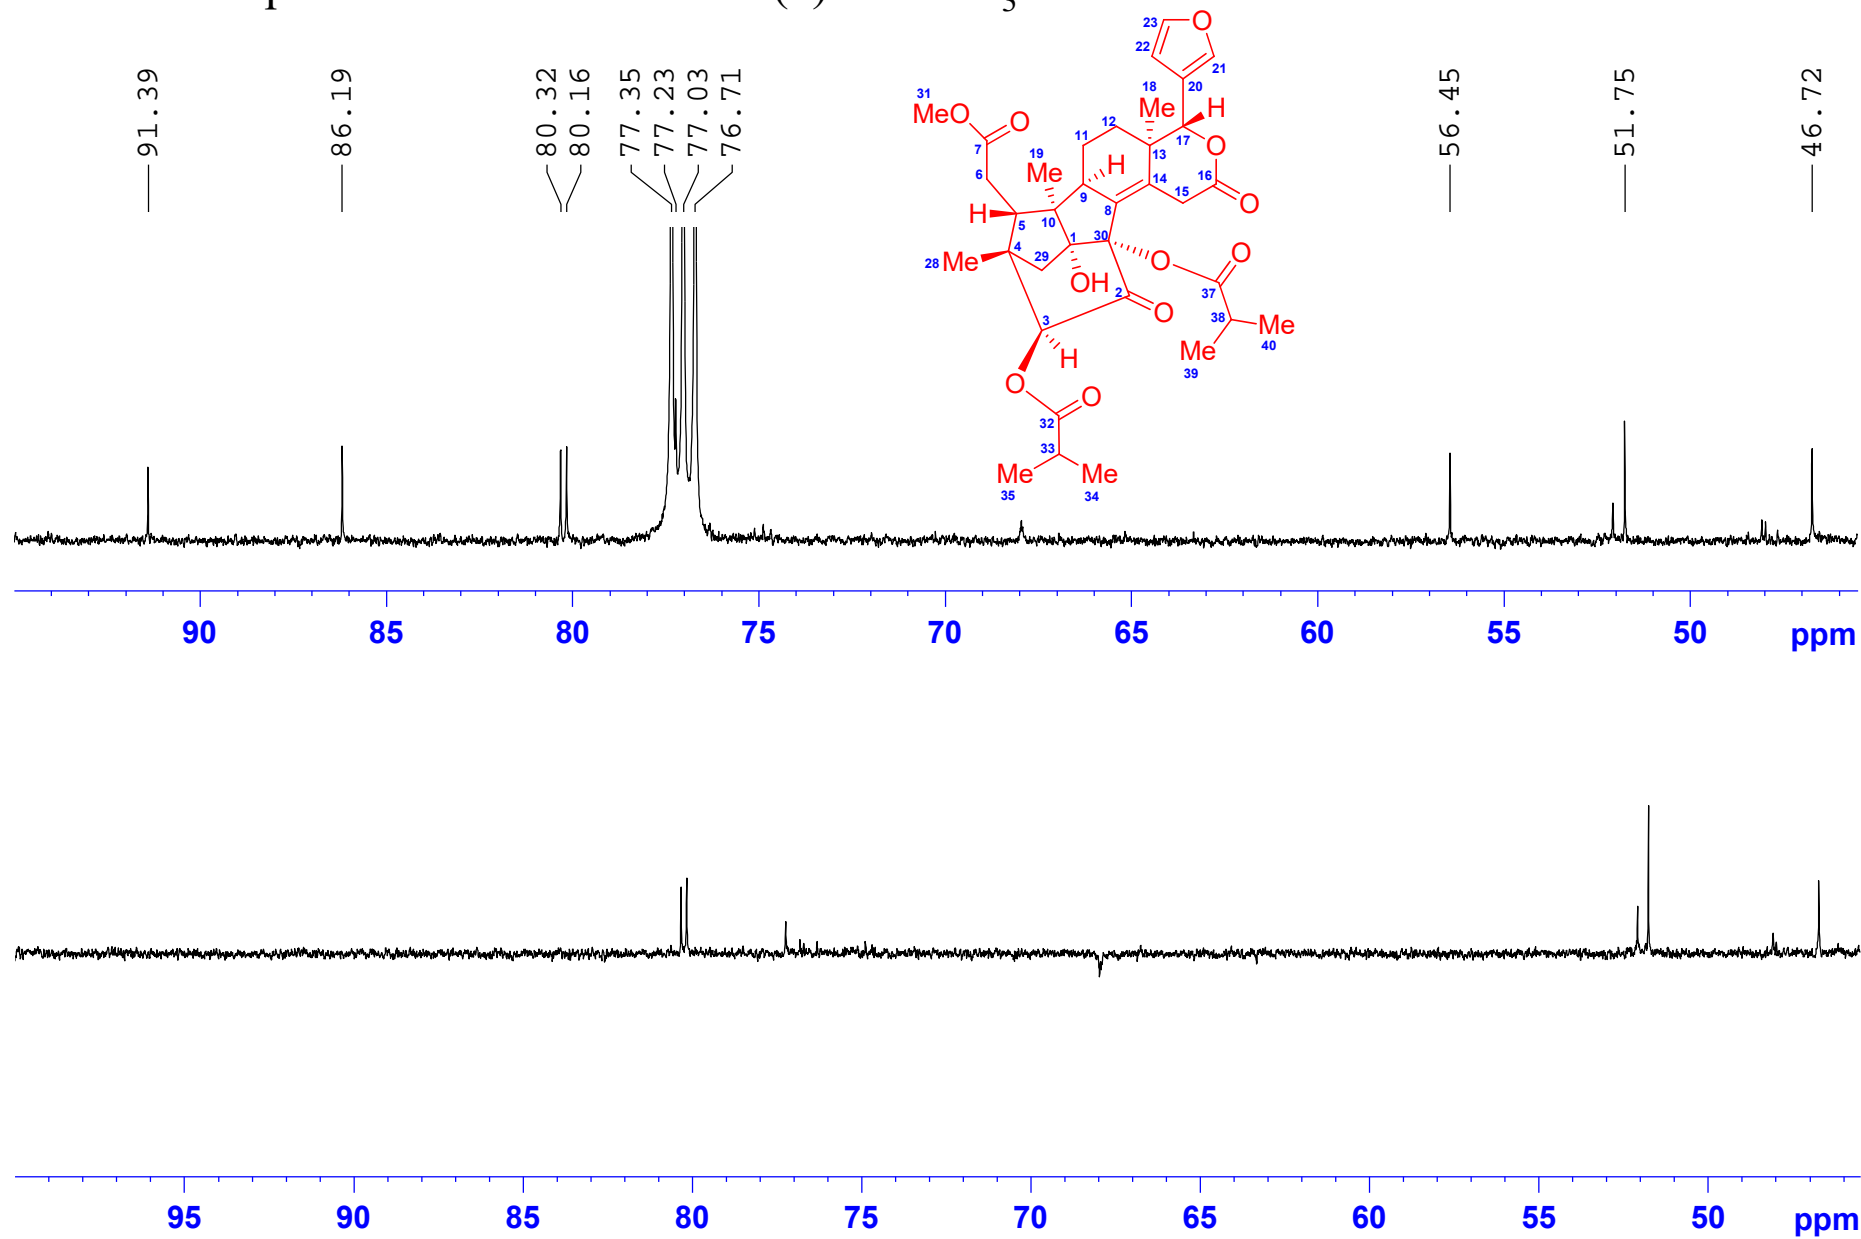

# DEPT 135 spectrum of Krishnolide D (4) in CDCl<sub>3</sub>

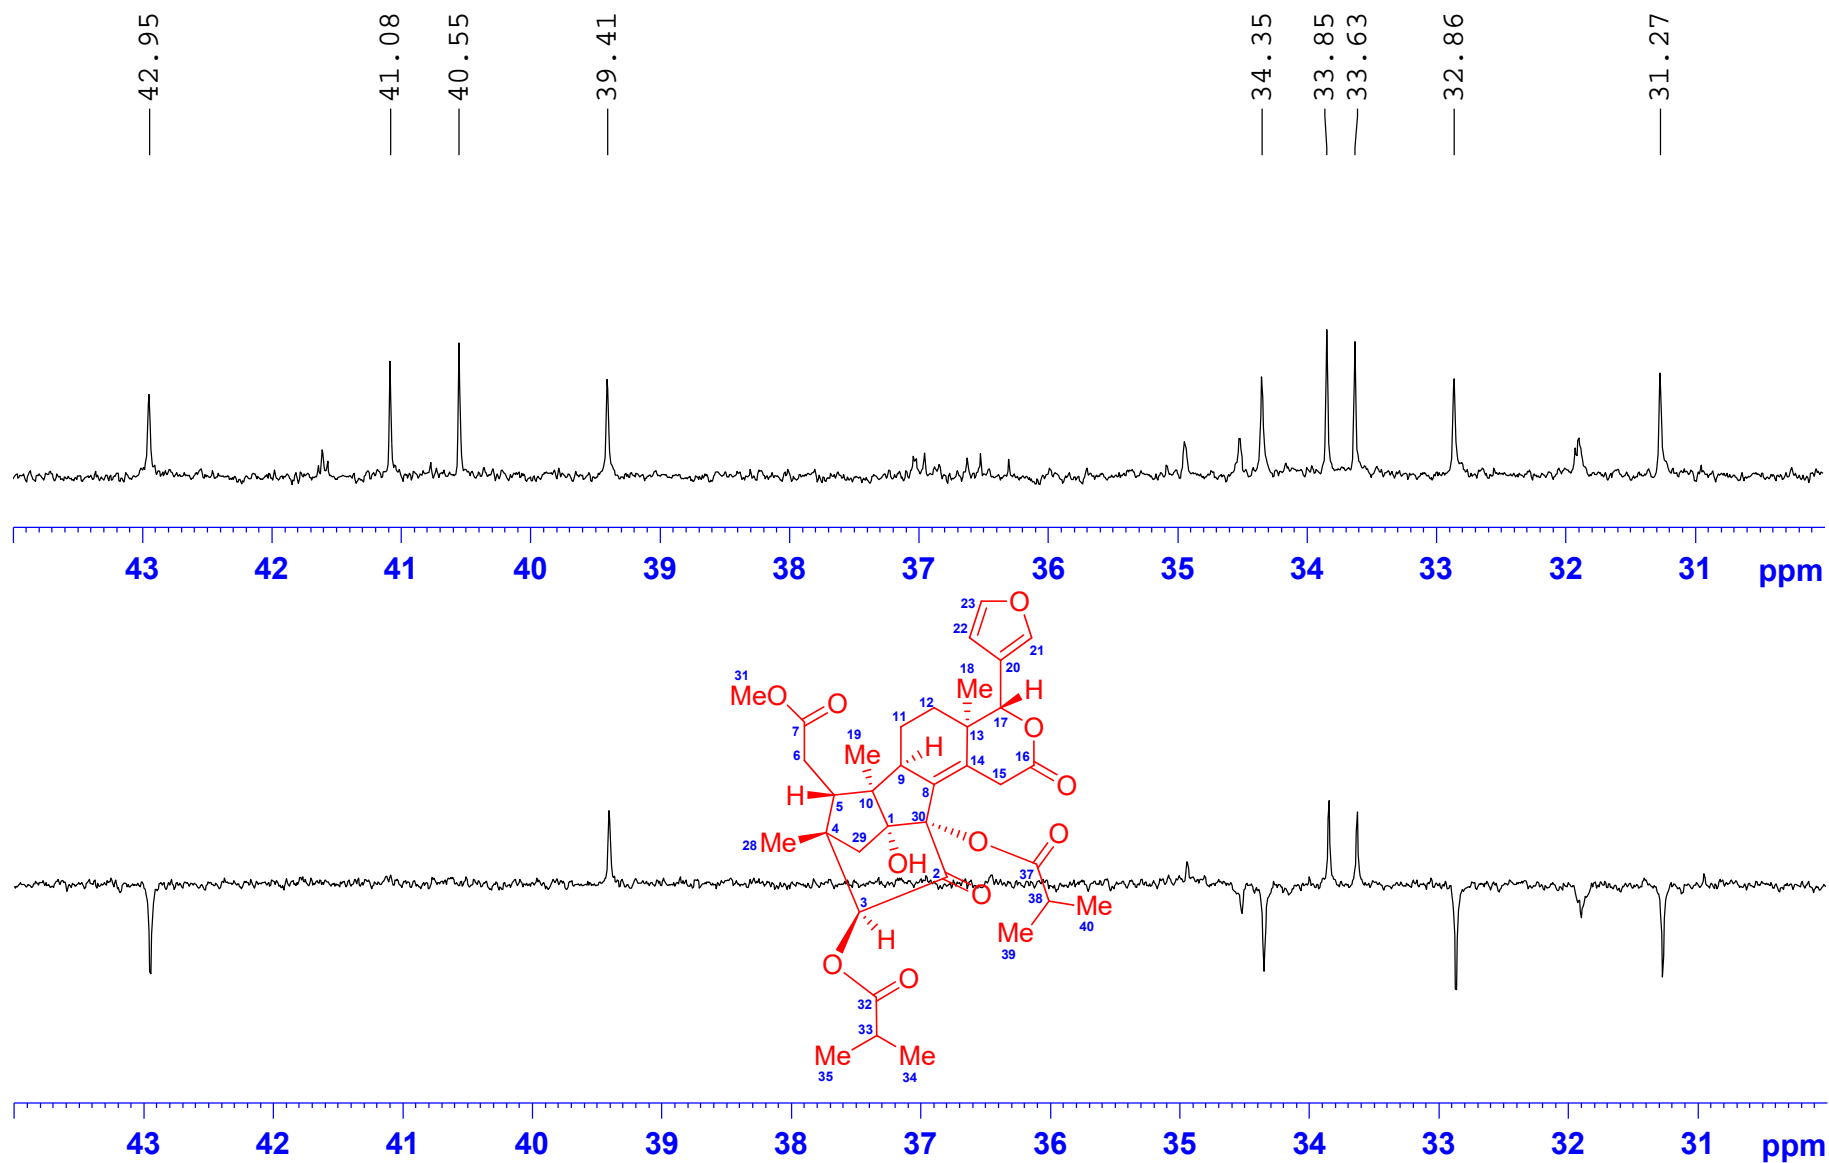

# DEPT 135 spectrum of Krishnolide D (4) in CDCl<sub>3</sub>

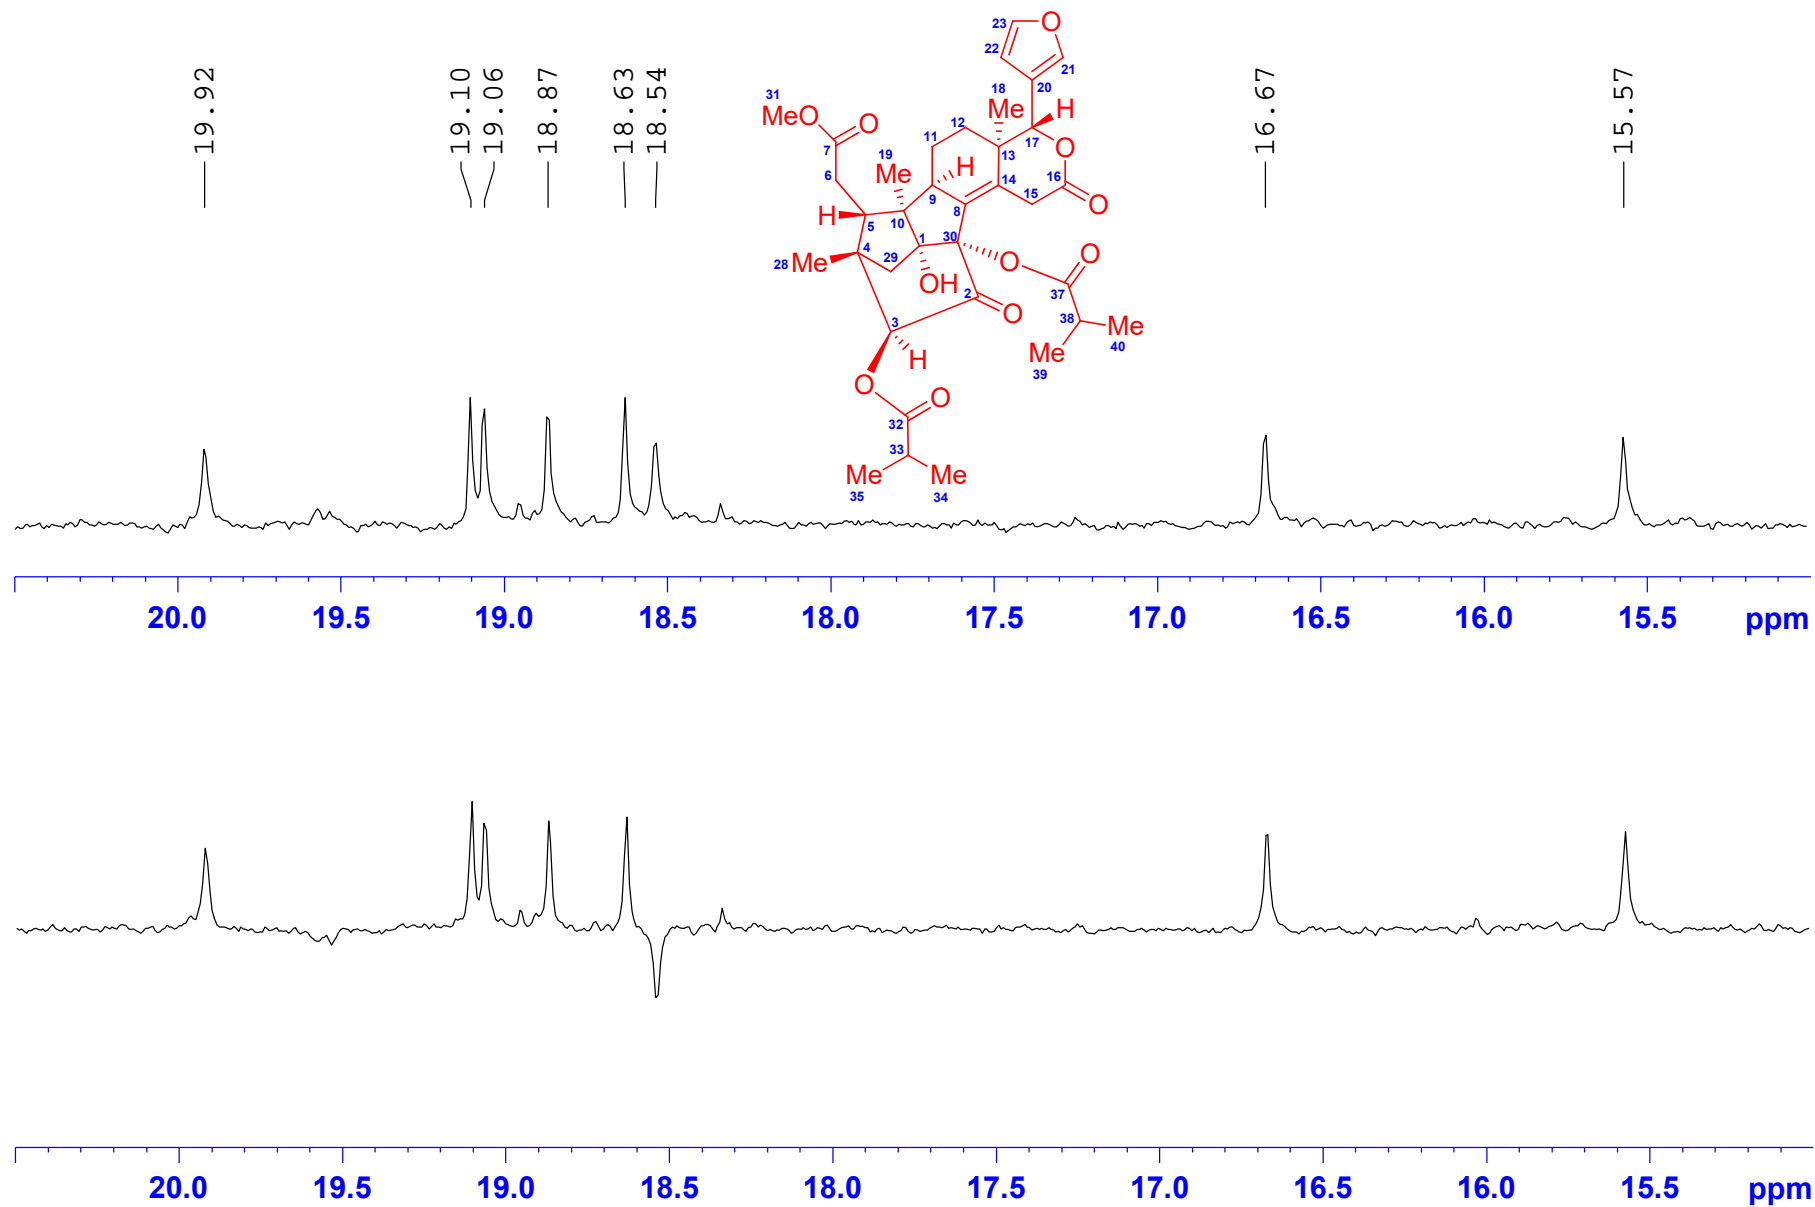

# $^1\text{H}$ - $^1\text{H}$ COSY spectrum of Krishnolide D (4) in $\text{CDCl}_3$

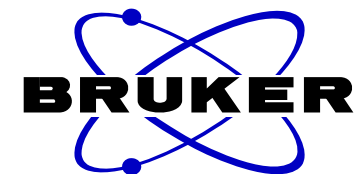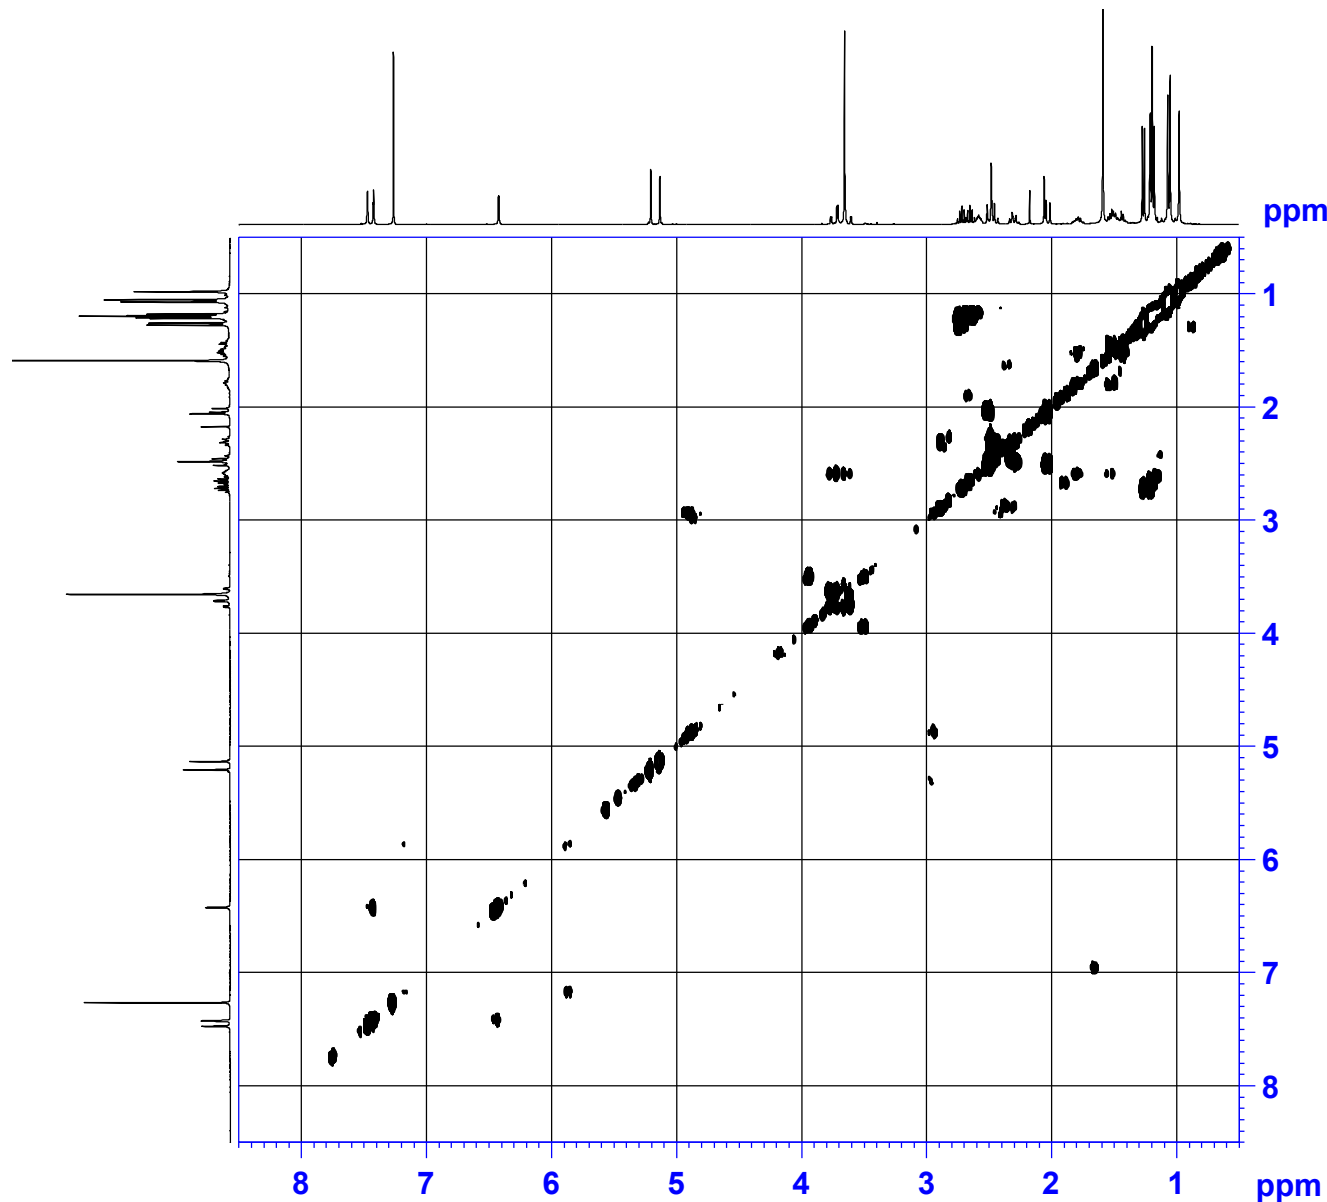

```

NAME           ZQ-24-1
EXPNO          4
PROCNO         1
Date_          20170401
Time           8.30
INSTRUM        spect
PROBHD         5 mm CPPBBO BB
PULPROG        cosygpppqf
TD             2048
SOLVENT        CDCl3
NS             8
DS             8
SWH            3906.250 Hz
FIDRES        1.907349 Hz
AQ            0.2621940 sec
RG            208.5
DW            128.000 usec
DE            10.00 usec
TE            297.0 K
D0            0.00000300 sec
D1            1.89678097 sec
D11           0.03000000 sec
D12           0.00002000 sec
D13           0.00000400 sec
D16           0.00020000 sec
IN0           0.00025600 sec
    
```

```

===== CHANNEL f1 =====
SF01          400.1318006 MHz
NUC1          1H
P0            11.50 usec
P1            11.50 usec
P17           2500.00 usec
ND0           1
TD            128
SF01          400.1318 MHz
FIDRES        30.517578 Hz
SW            9.762 ppm
FnMODE        QF
SI            1024
SF            400.1300050 MHz
WDW           QSINE
SSB           0
LB            0.00 Hz
GB            0
PC            1.40
SI            1024
MC2           QF
SF            400.1300050 MHz
WDW           QSINE
SSB           0
LB            0.00 Hz
GB            0
    
```

$^1\text{H}$ - $^1\text{H}$  COSY spectrum of Krishnolide D (4) in  $\text{CDCl}_3$

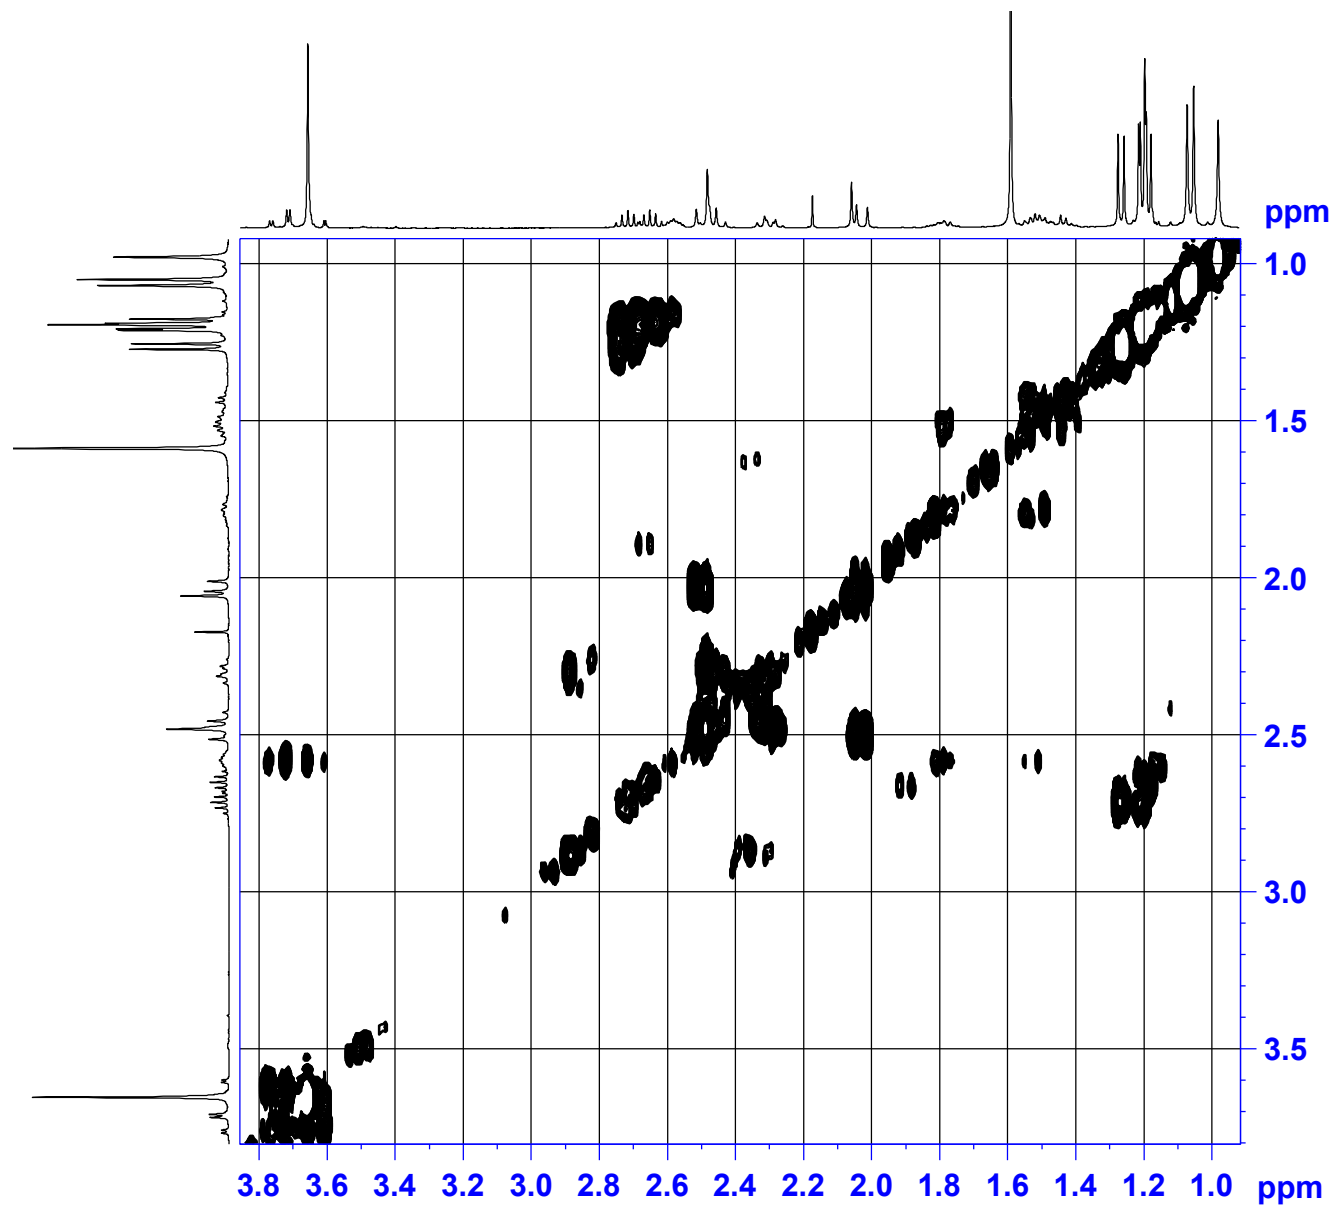

$^1\text{H}$ - $^1\text{H}$  COSY spectrum of Krishnolide D (4) in  $\text{CDCl}_3$

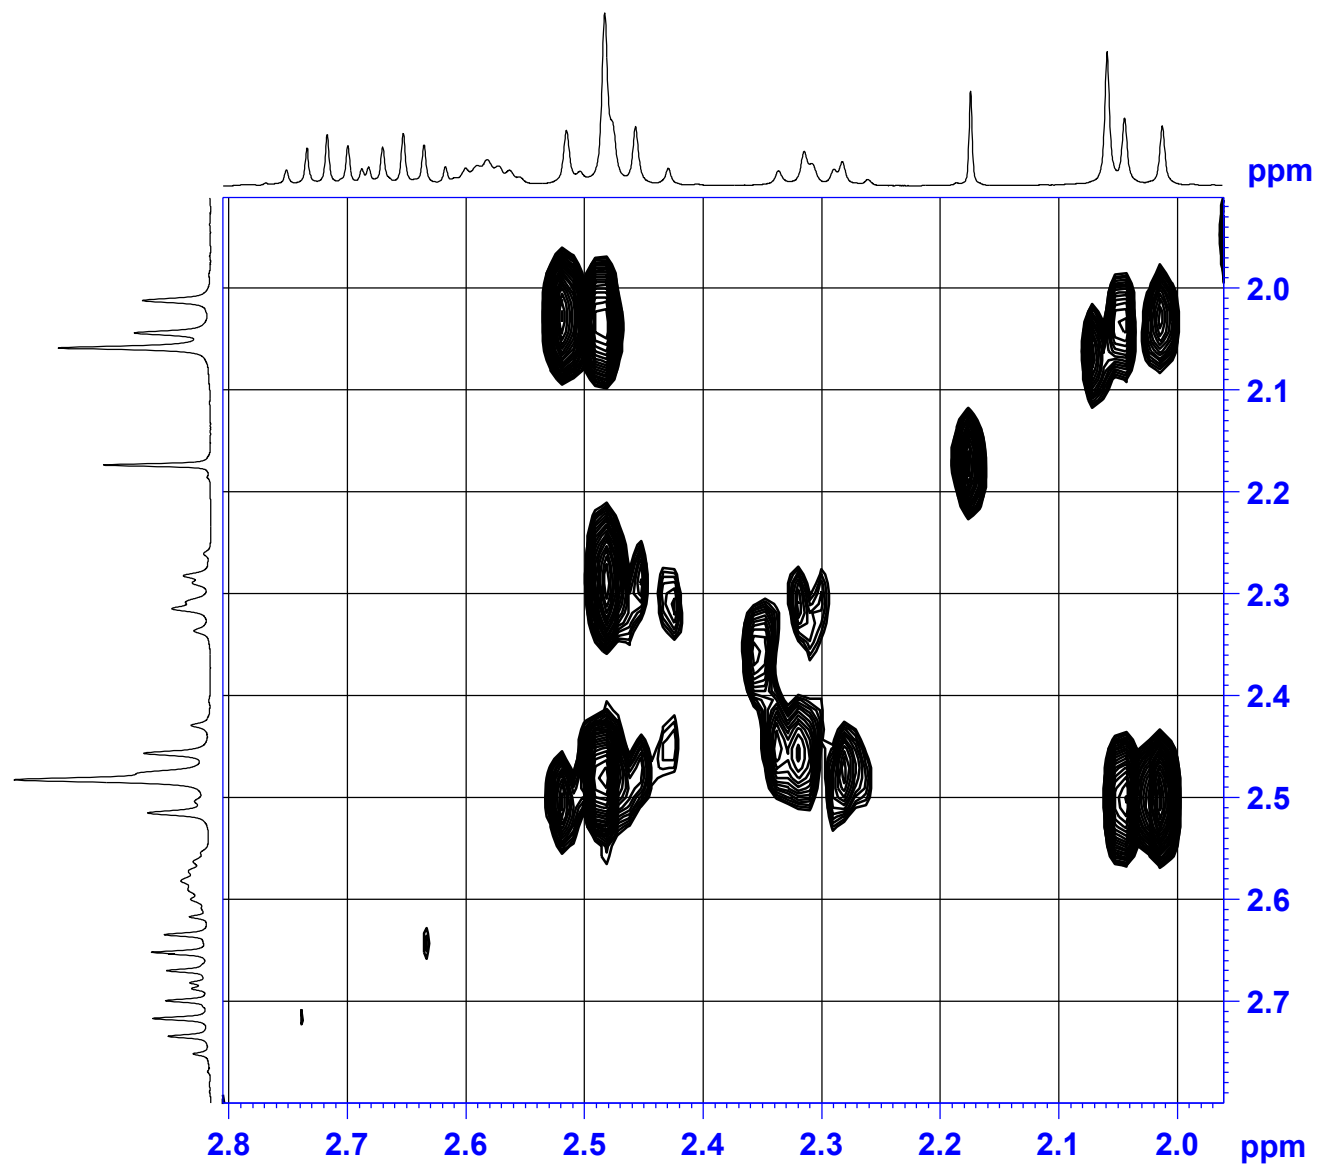

$^1\text{H}$ - $^1\text{H}$  COSY spectrum of Krishnolide D (4) in  $\text{CDCl}_3$

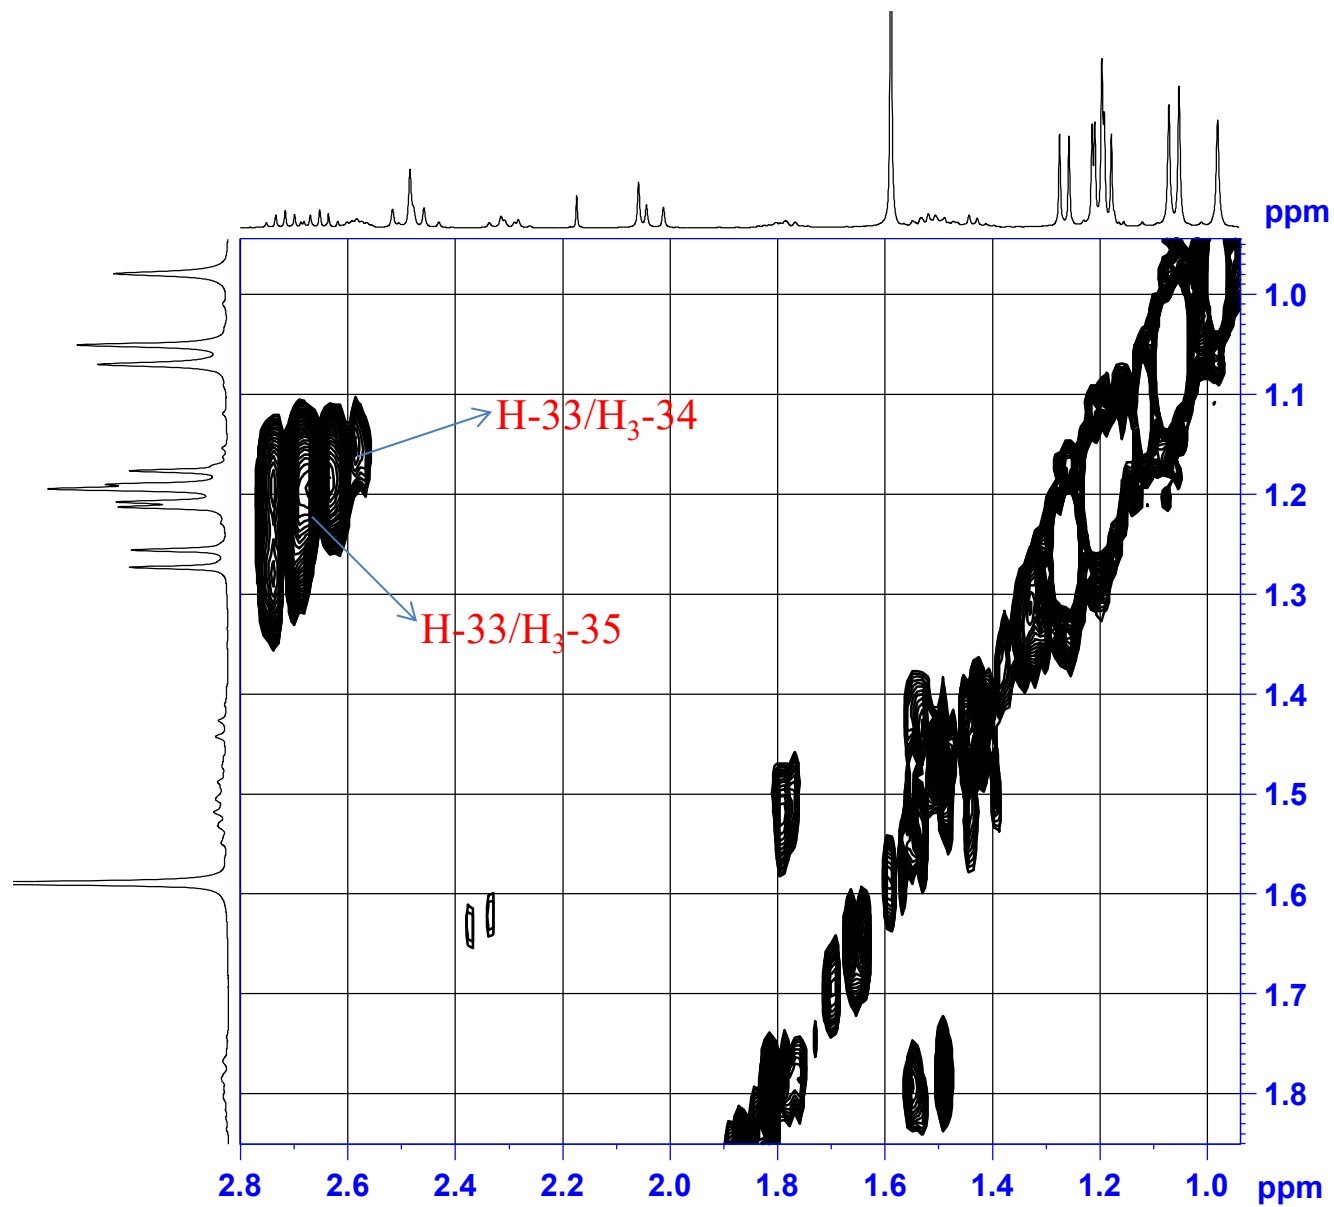





# HSQC spectrum of Krishnolide D (4) in CDCl<sub>3</sub>

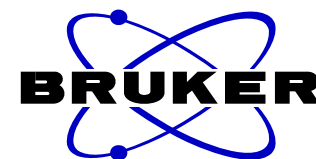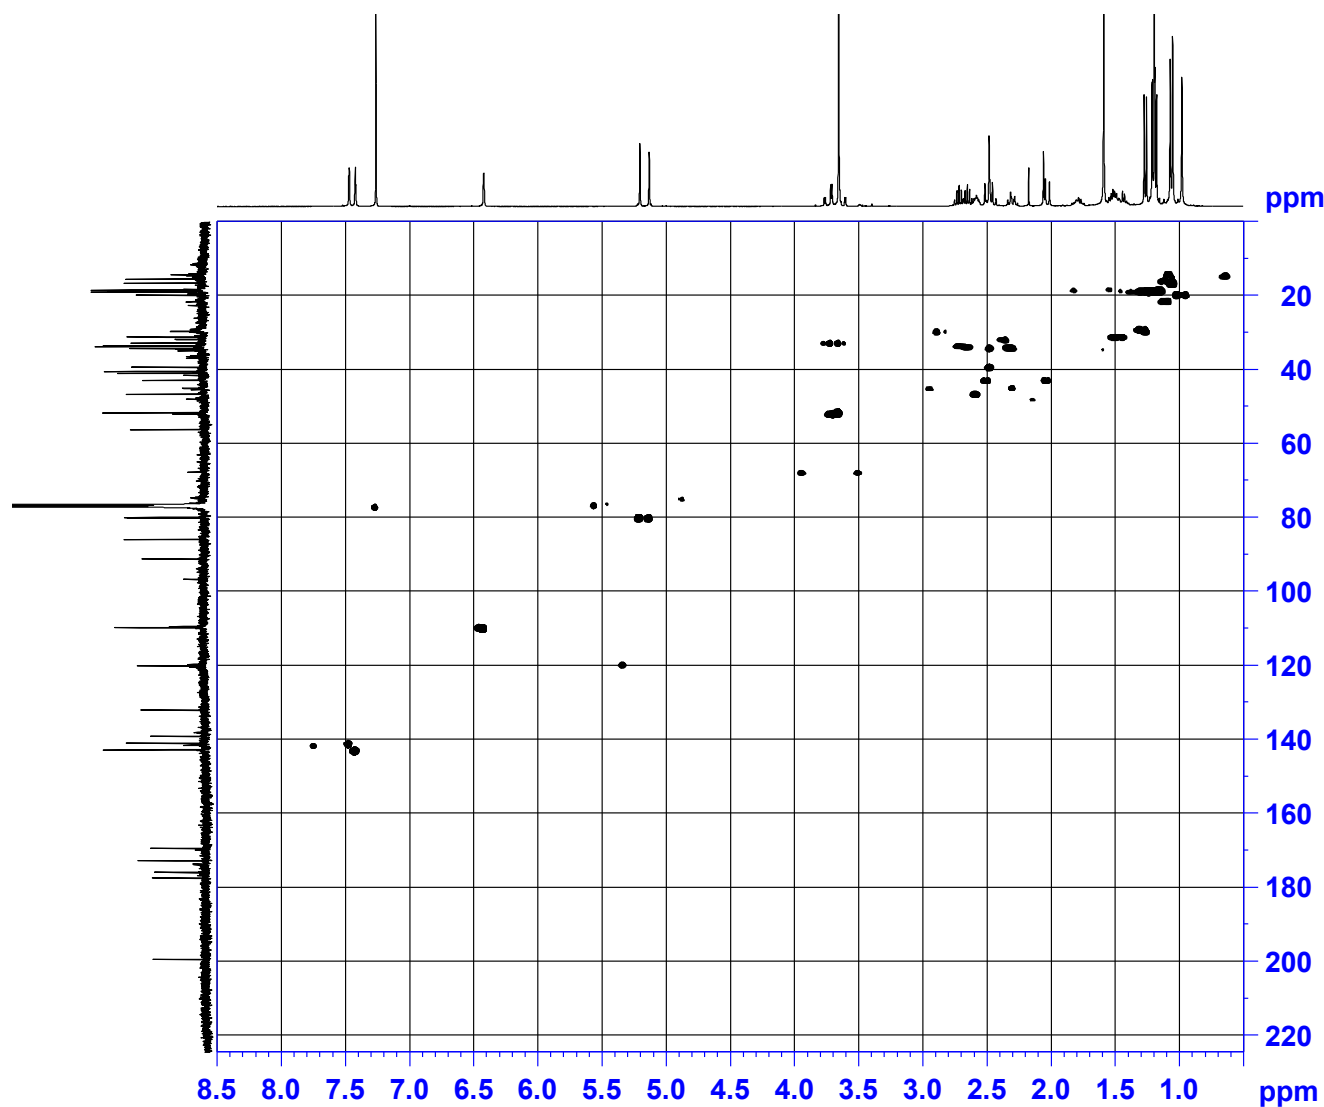

```

NAME          ZQ-24-1
EXPNO         5
PROCNO        1
Date_         20170401
Time          9.10
INSTRUM       spect
PROBHD        5 mm CPPBBO BB
PULPROG       hsqcetgpsi2
TD            1024
SOLVENT       CDCl3
NS            16
DS            16
SWH           4302.926 Hz
FIDRES        4.202076 Hz
AQ            0.1190388 sec
RG            208.5
DW            116.200 usec
DE            10.00 usec
TE            297.0 K
CNST2         145.0000000
D0            0.00000300 sec
D1            1.46497905 sec
D4            0.00172414 sec
D11           0.03000000 sec
D16           0.00020000 sec
D24           0.00086207 sec
IN0           0.00002080 sec
ZGOPTNS
    
```

```

===== CHANNEL f1 =====
SF01          400.1320007 MHz
NUC1          1H
P1            11.50 usec
P2            23.00 usec
P28           0.00 usec
ND0           2
TD            256
SF01          100.6233 MHz
FIDRES        93.900238 Hz
SW            238.896 ppm
FnMODE        Echo-Antiecho
SI            1024
SF            400.1300050 MHz
WDW           QSINE
SSB           2
LB            0.00 Hz
GB            0
PC            1.40
SI            1024
MC2           echo-antiecho
SF            100.6127593 MHz
WDW           QSINE
SSB           2
LB            0.00 Hz
GB            0
    
```

# HSQC spectrum of Krishnolide D (4) in CDCl<sub>3</sub>

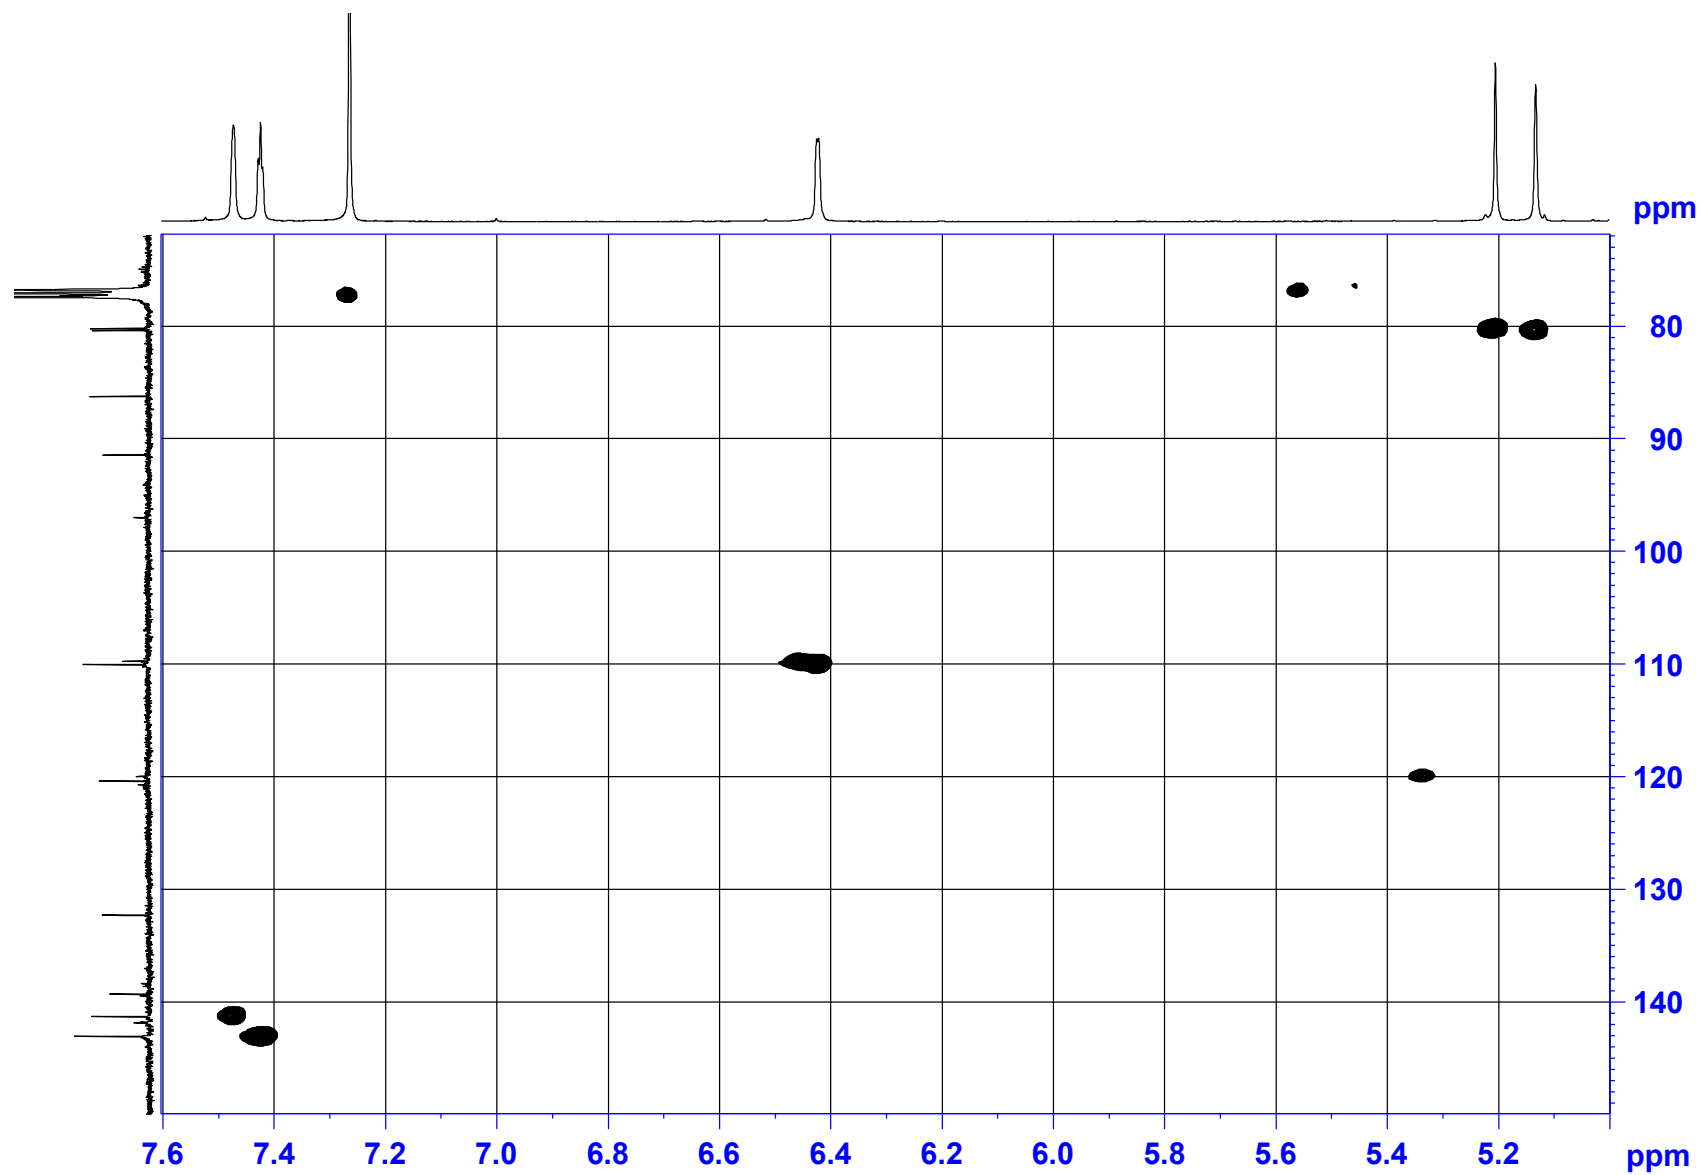

# HSQC spectrum of Krishnolide D (4) in CDCl<sub>3</sub>

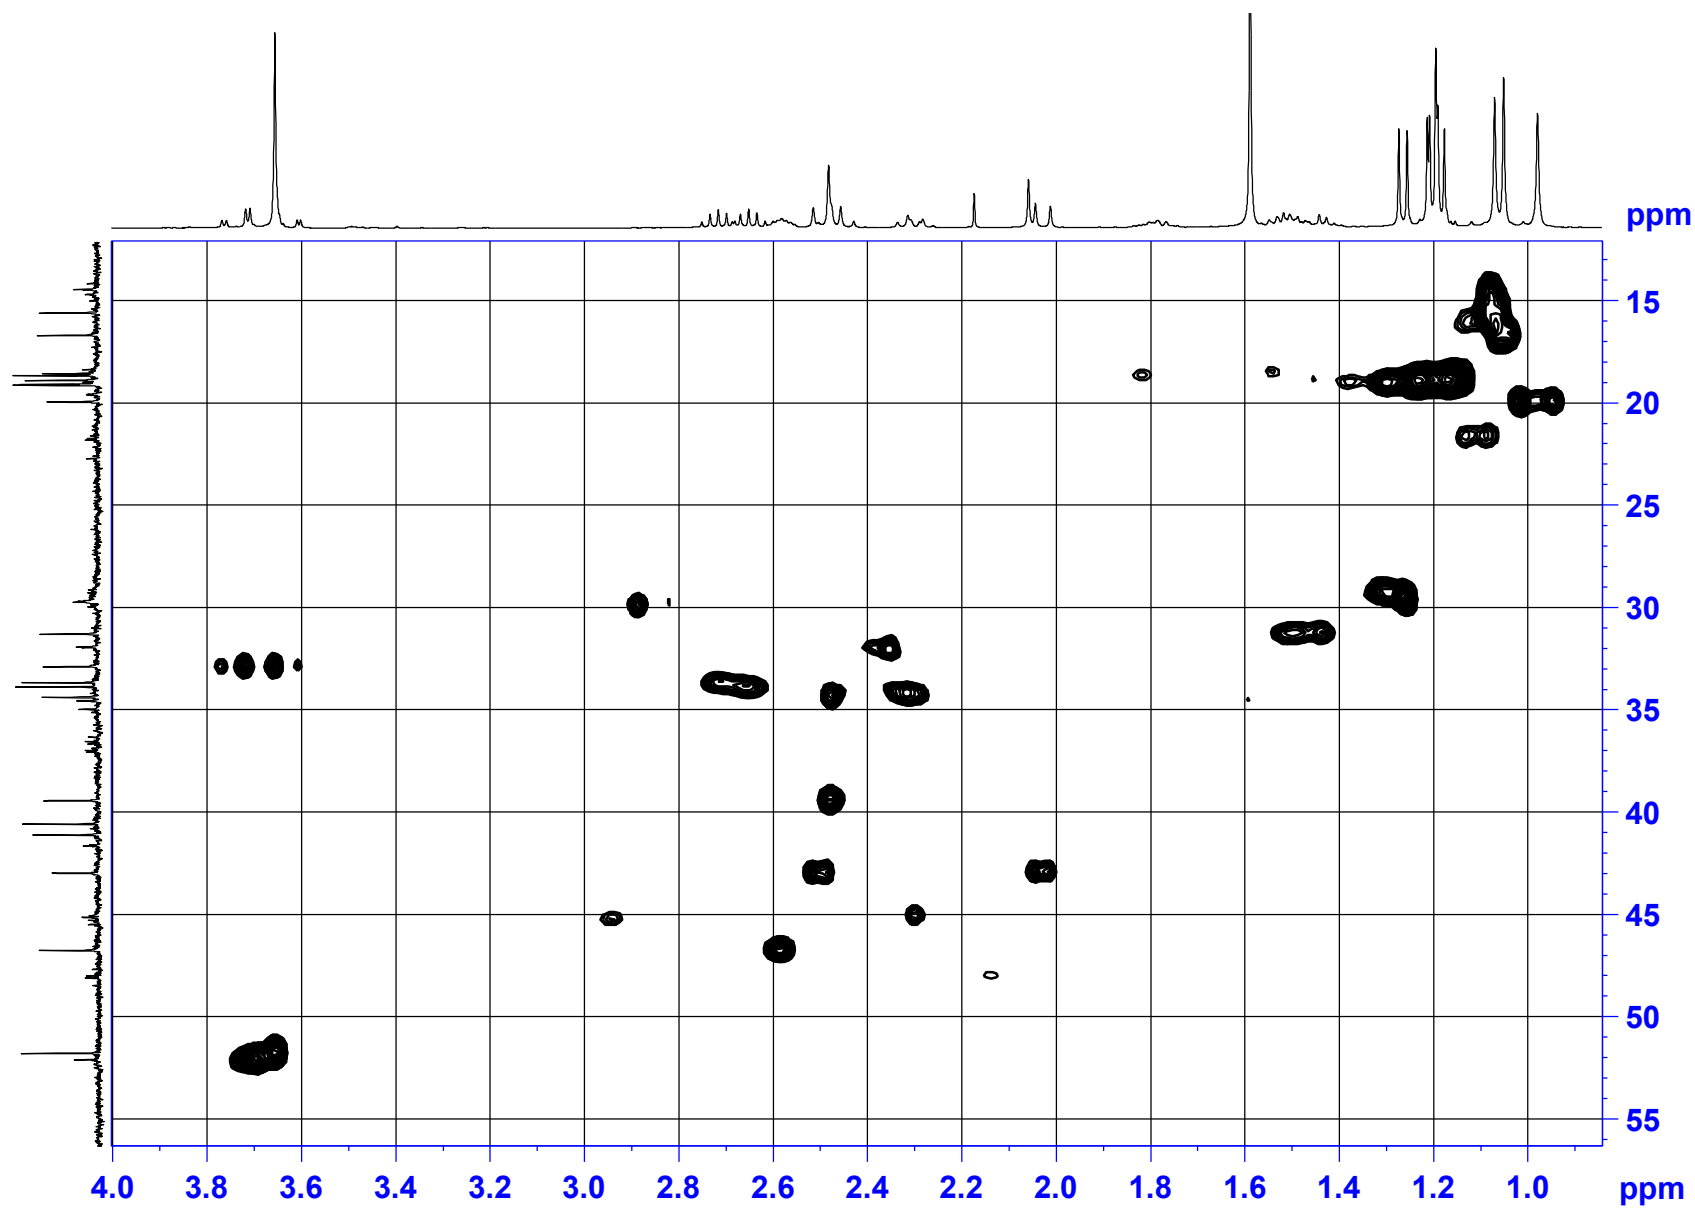

# HSQC spectrum of Krishnolide D (4) in CDCl<sub>3</sub>

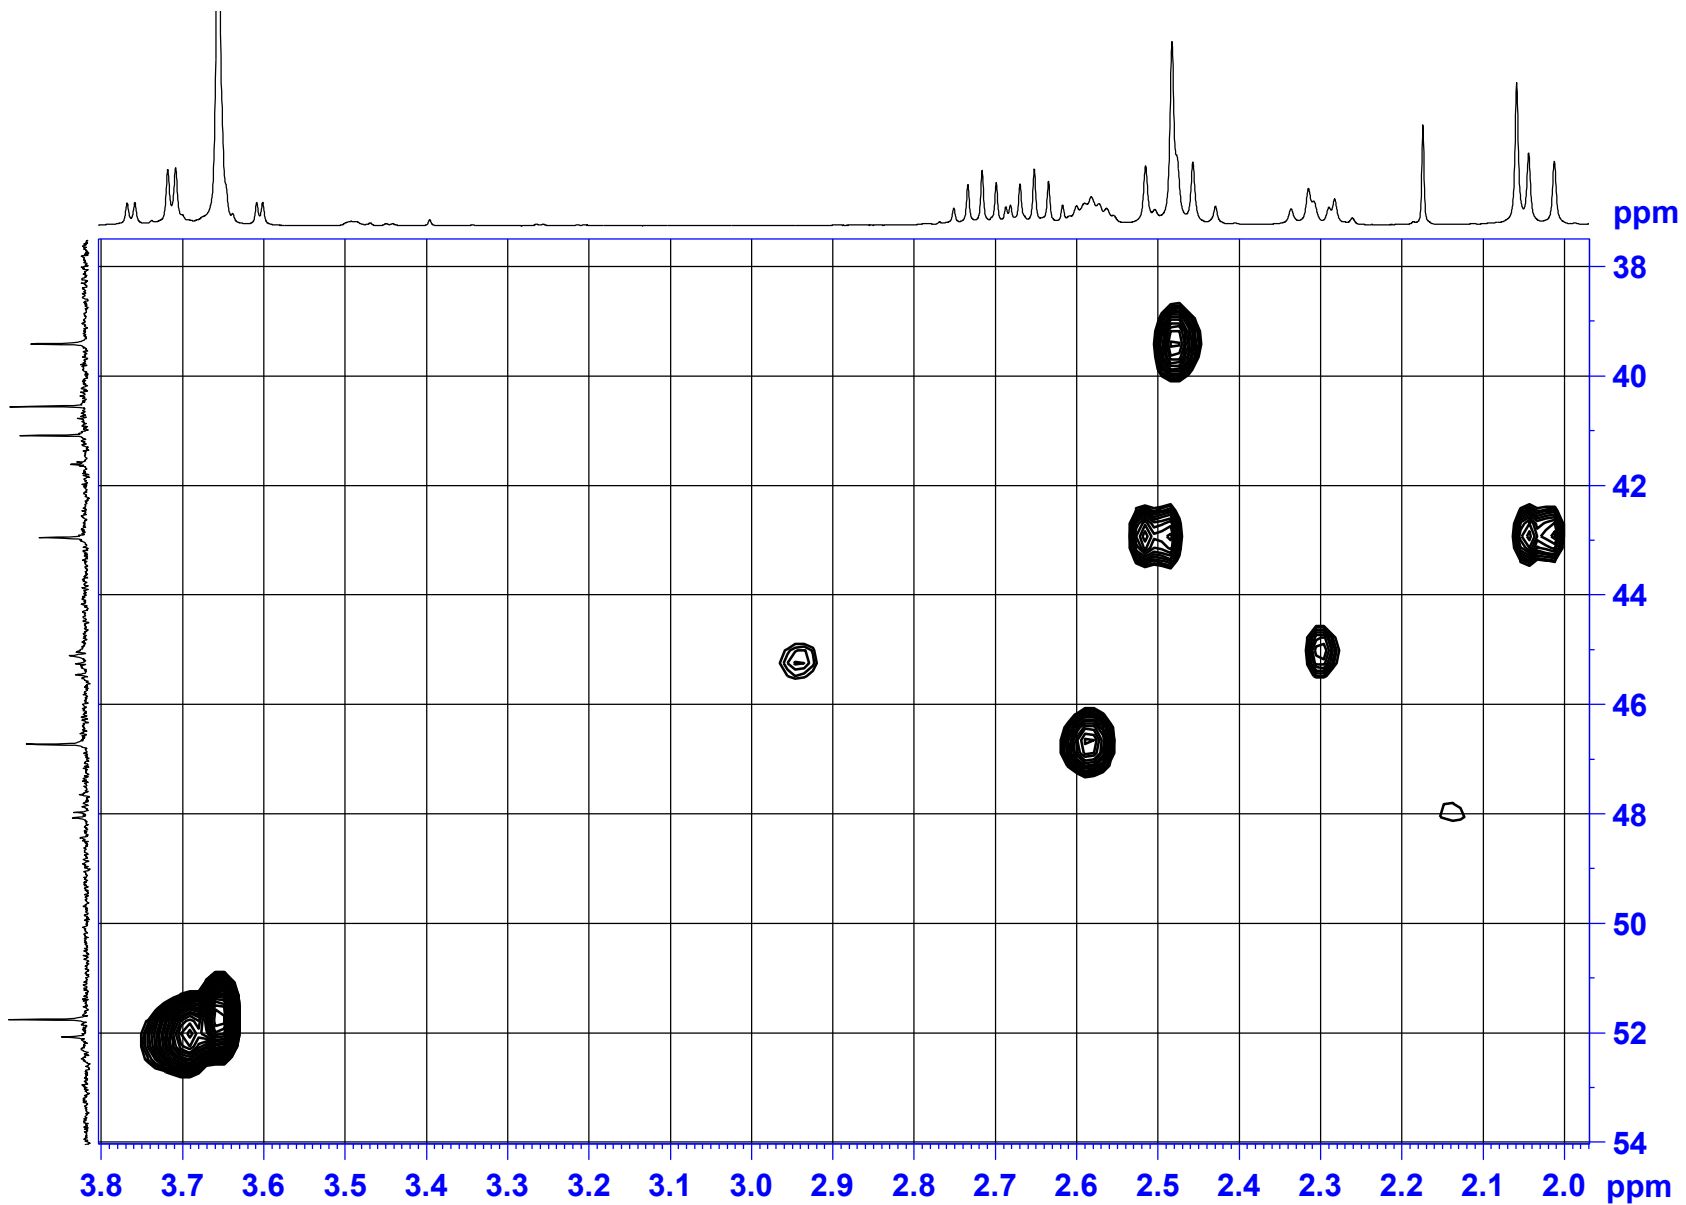

# HSQC spectrum of Krishnolide D (4) in CDCl<sub>3</sub>

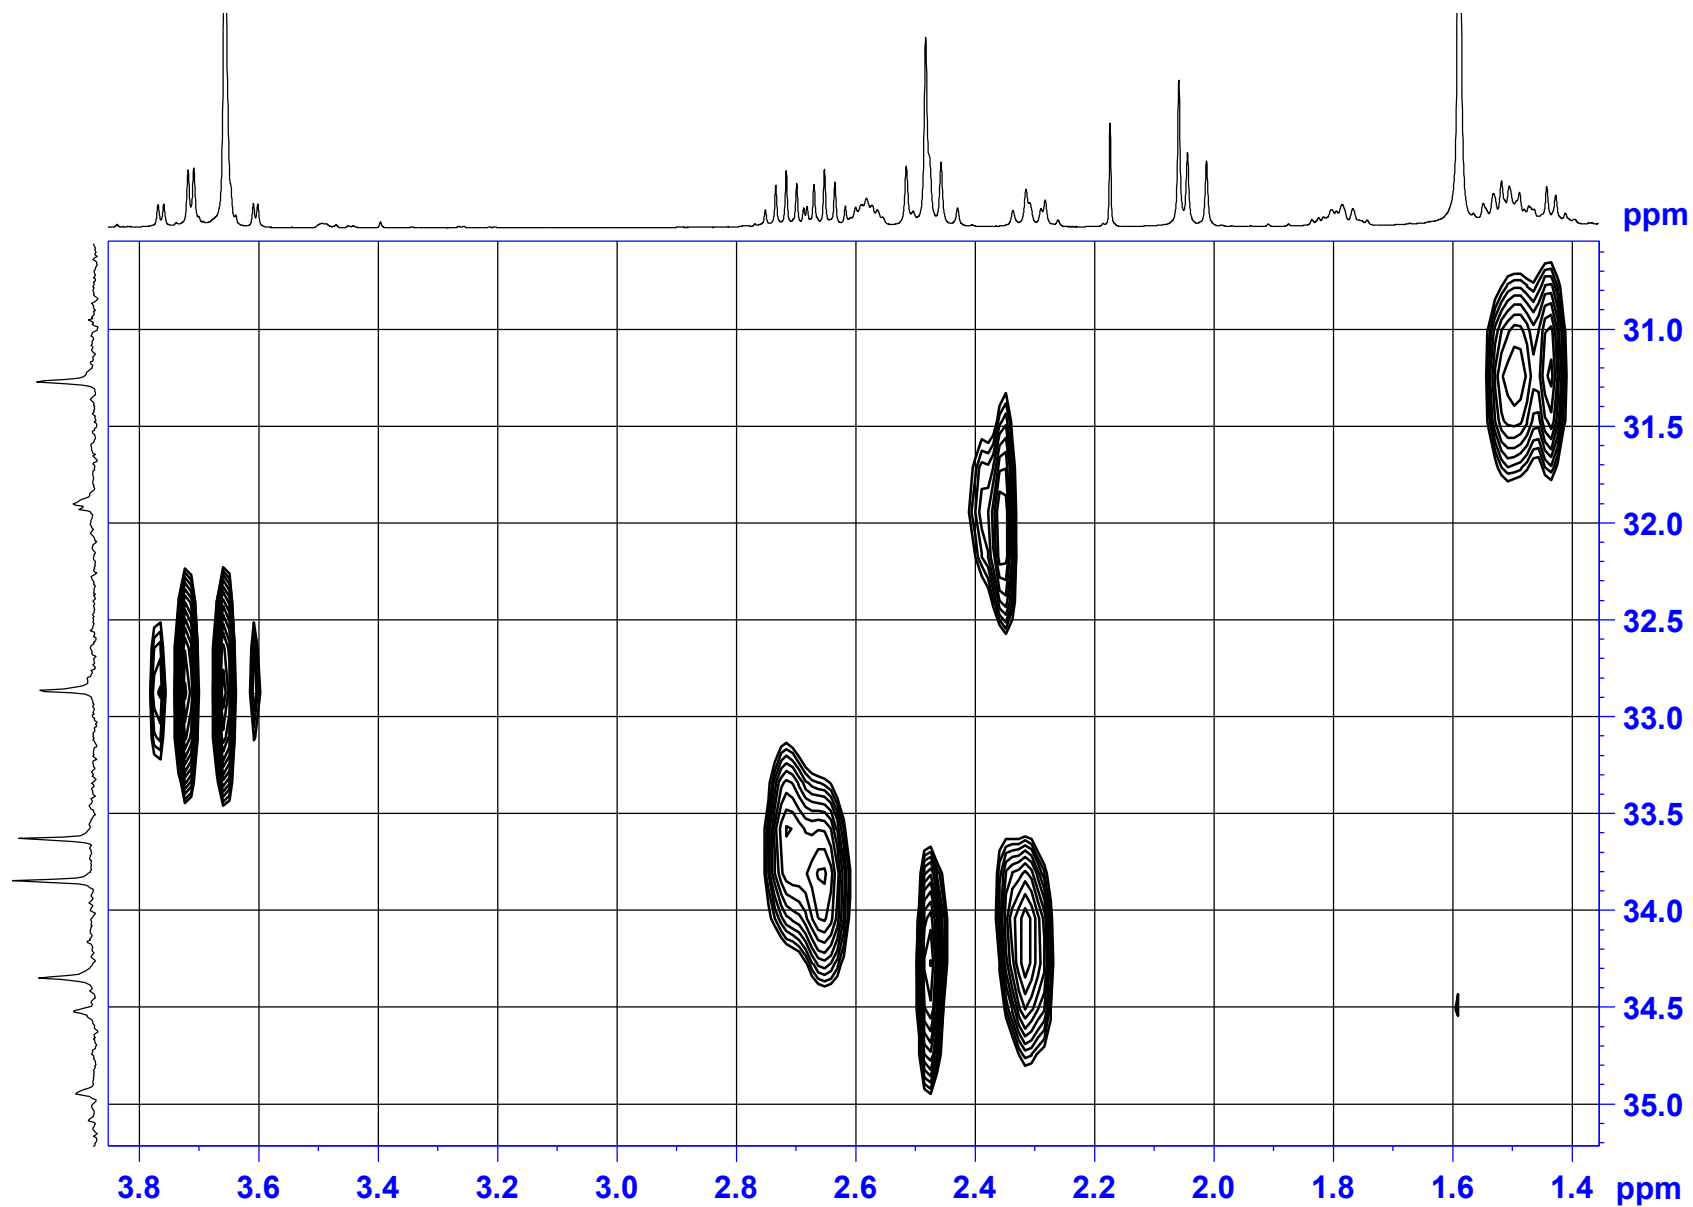

# HSQC spectrum of Krishnolide D (4) in CDCl<sub>3</sub>

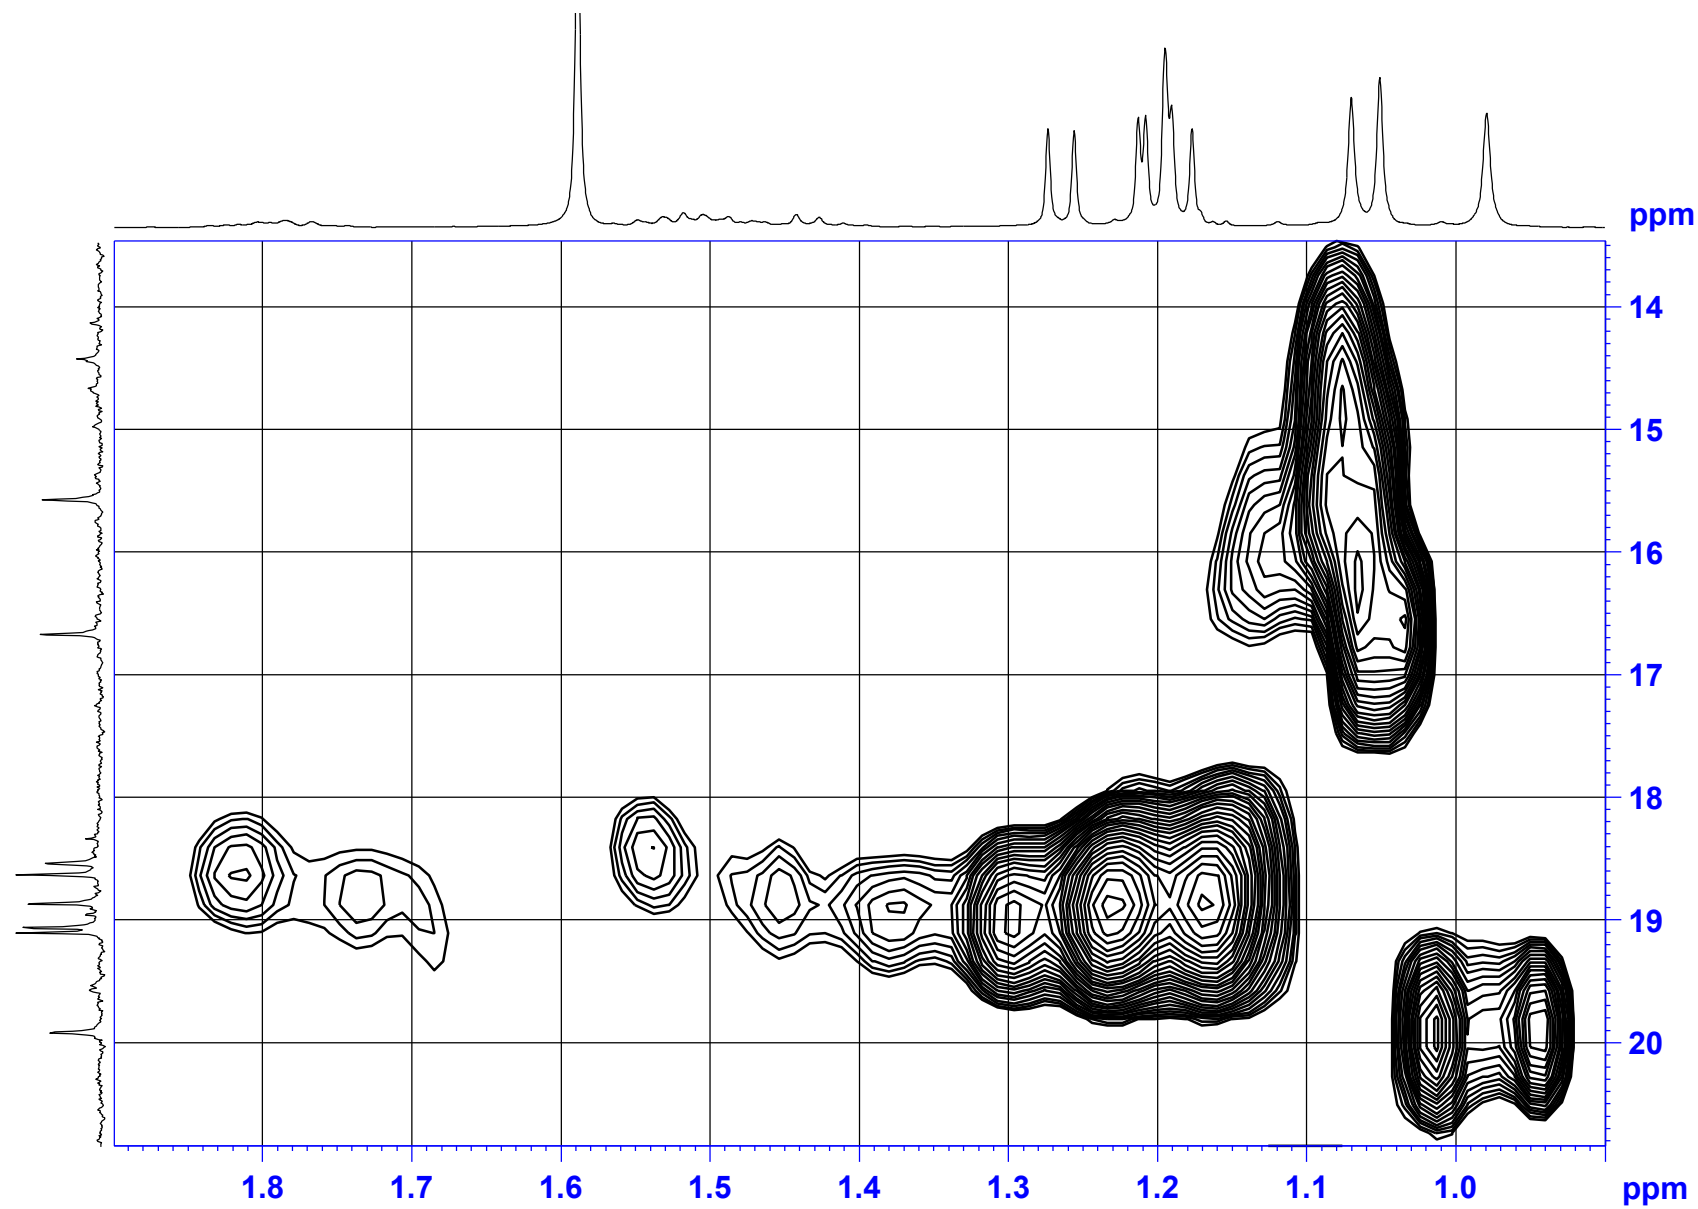

# HMBC spectrum of Krishnolide D (4) in CDCl<sub>3</sub>

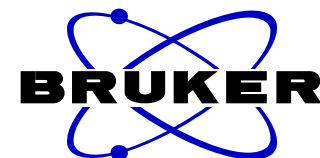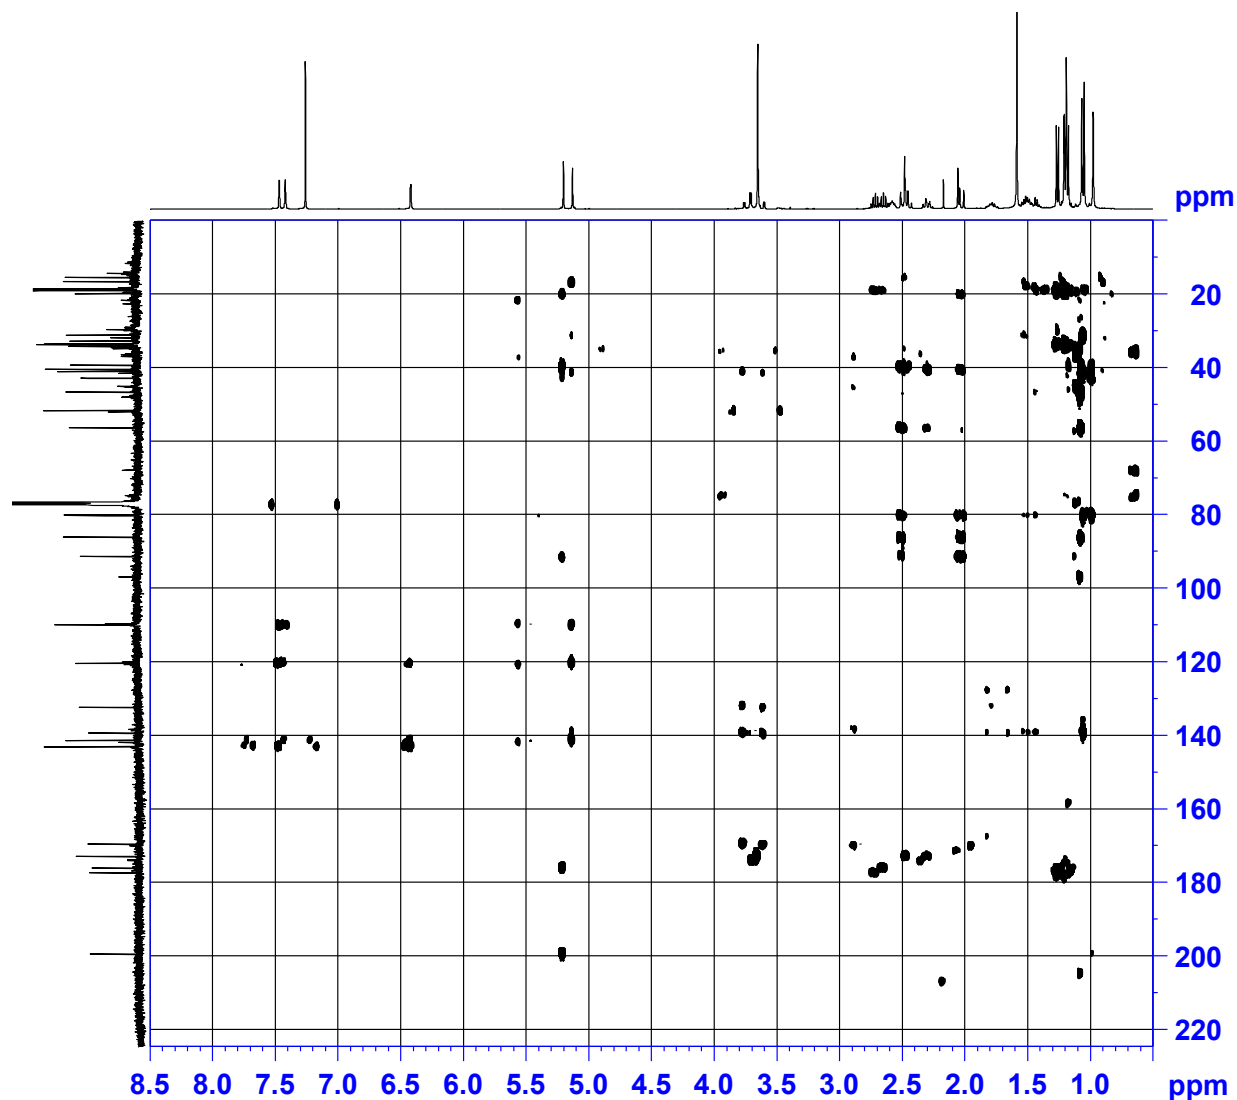

```

NAME           ZQ-24-1
EXPNO          6
PROCNO         1
Date_          20170401
Time           11.01
INSTRUM        spect
PROBHD         5 mm CPPBBO BB
PULPROG        hmbcgp1pndqf
TD             4096
SOLVENT        CDCl3
NS             32
DS             16
SWH            5197.505 Hz
FIDRES         1.268922 Hz
AQ             0.3940852 sec
RG             208.5
DW             96.200 usec
DE             10.00 usec
TE             297.0 K
CNST2          145.0000000
CNST13         10.0000000
D0             0.00000300 sec
D1             1.50000000 sec
D2             0.00344828 sec
D6             0.05000000 sec
D16           0.00020000 sec
IN0           0.00002080 sec
    
```

```

===== CHANNEL f1 =====
SFO1          400.1323208 MHz
NUC1           1H
P1             11.50 usec
P2             23.00 usec
ND0            2
TD             128
SFO1          100.6233 MHz
FIDRES         187.800476 Hz
SW             238.896 ppm
FnMODE         QF
SI             2048
SF            400.1300050 MHz
WDW            SINE
SSB            0
LB             0.00 Hz
GB             0
PC             1.40
SI             1024
MC2            QF
SF            100.6127593 MHz
WDW            SINE
SSB            0
LB             0.00 Hz
GB             0
    
```

# HMBC spectrum of Krishnolide D (4) in CDCl<sub>3</sub>

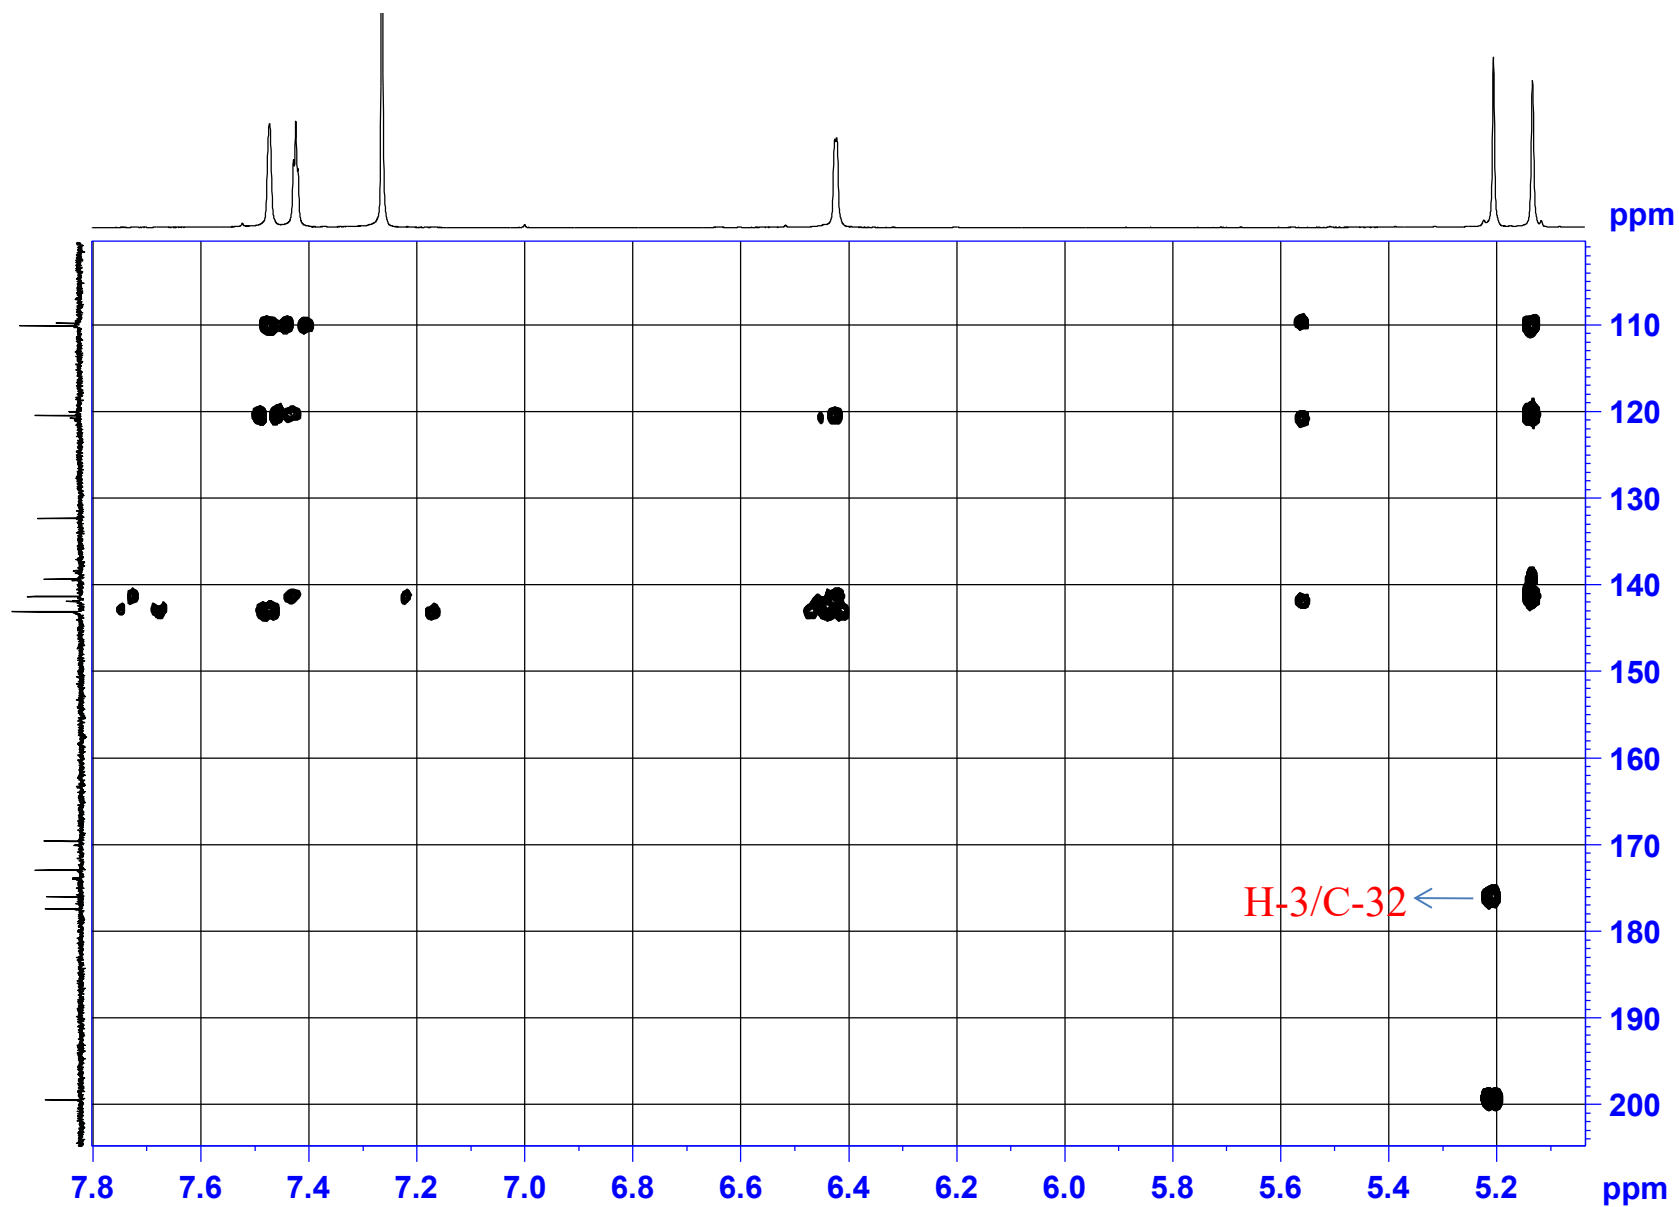



# HMBC spectrum of Krishnolide D (4) in CDCl<sub>3</sub>

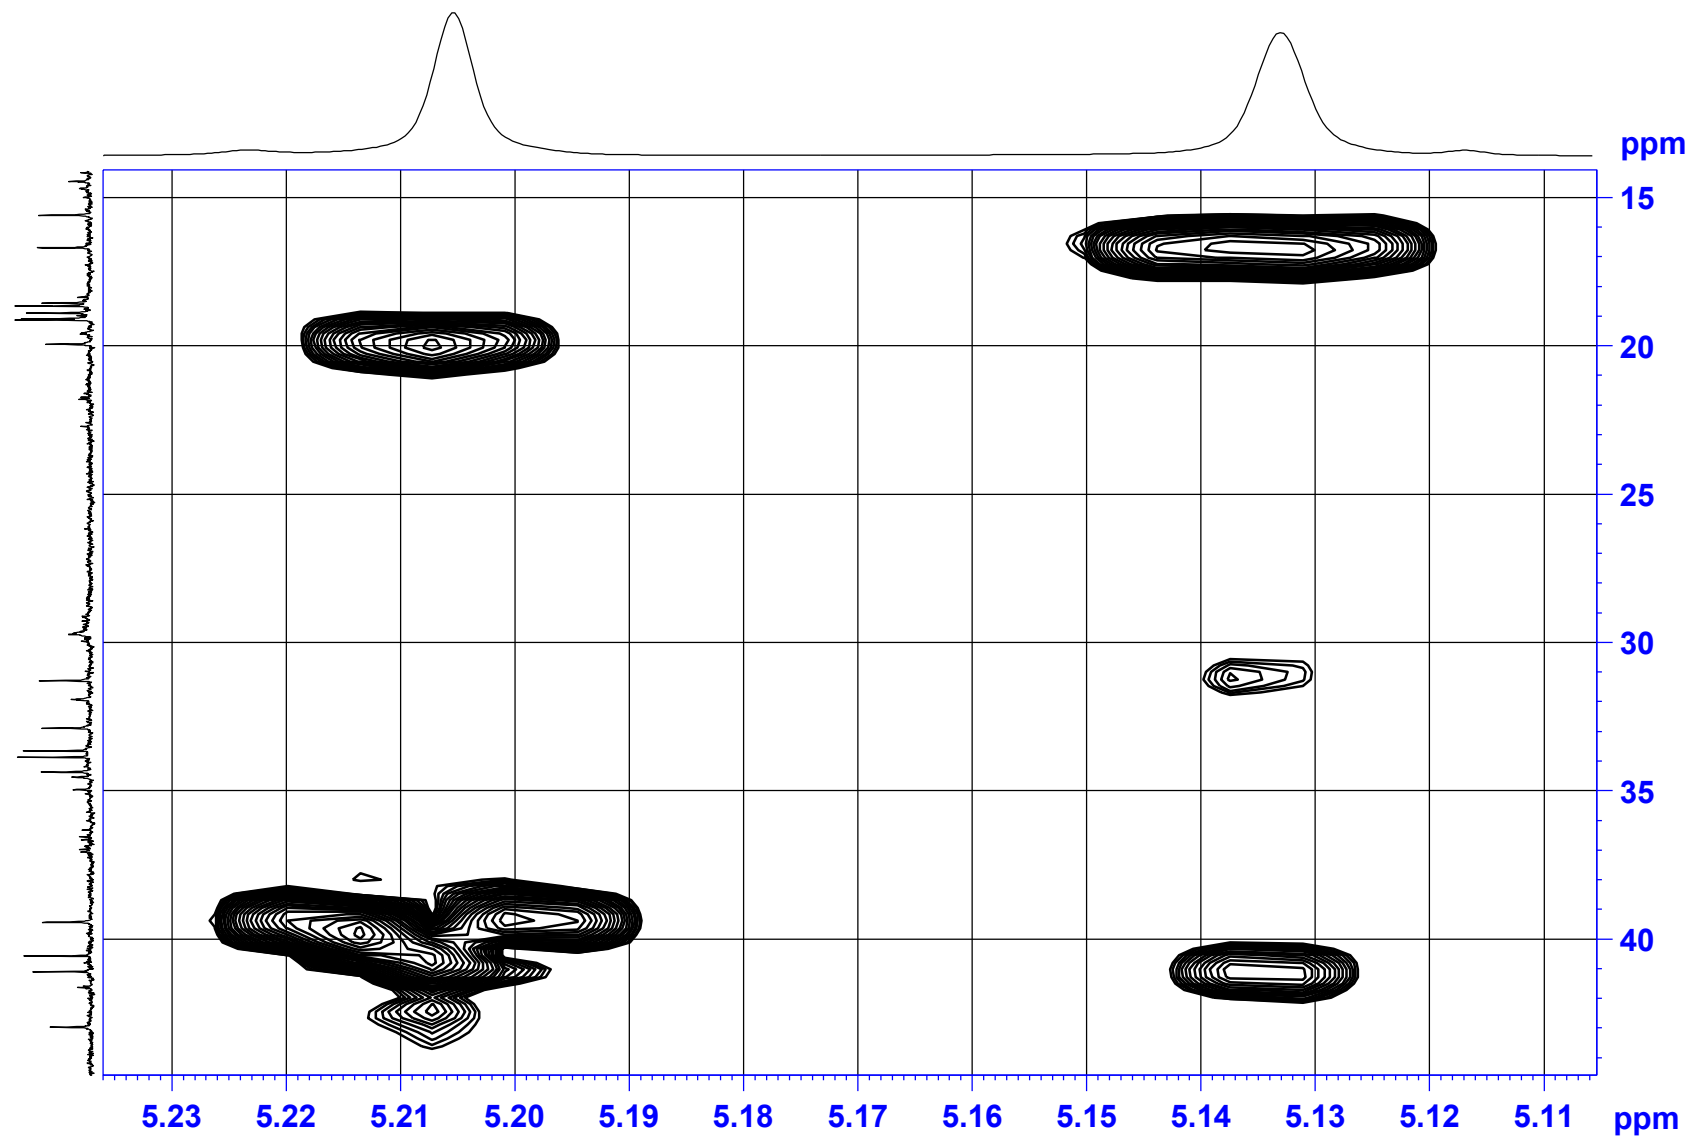

# HMBC spectrum of Krishnolide D (4) in CDCl<sub>3</sub>

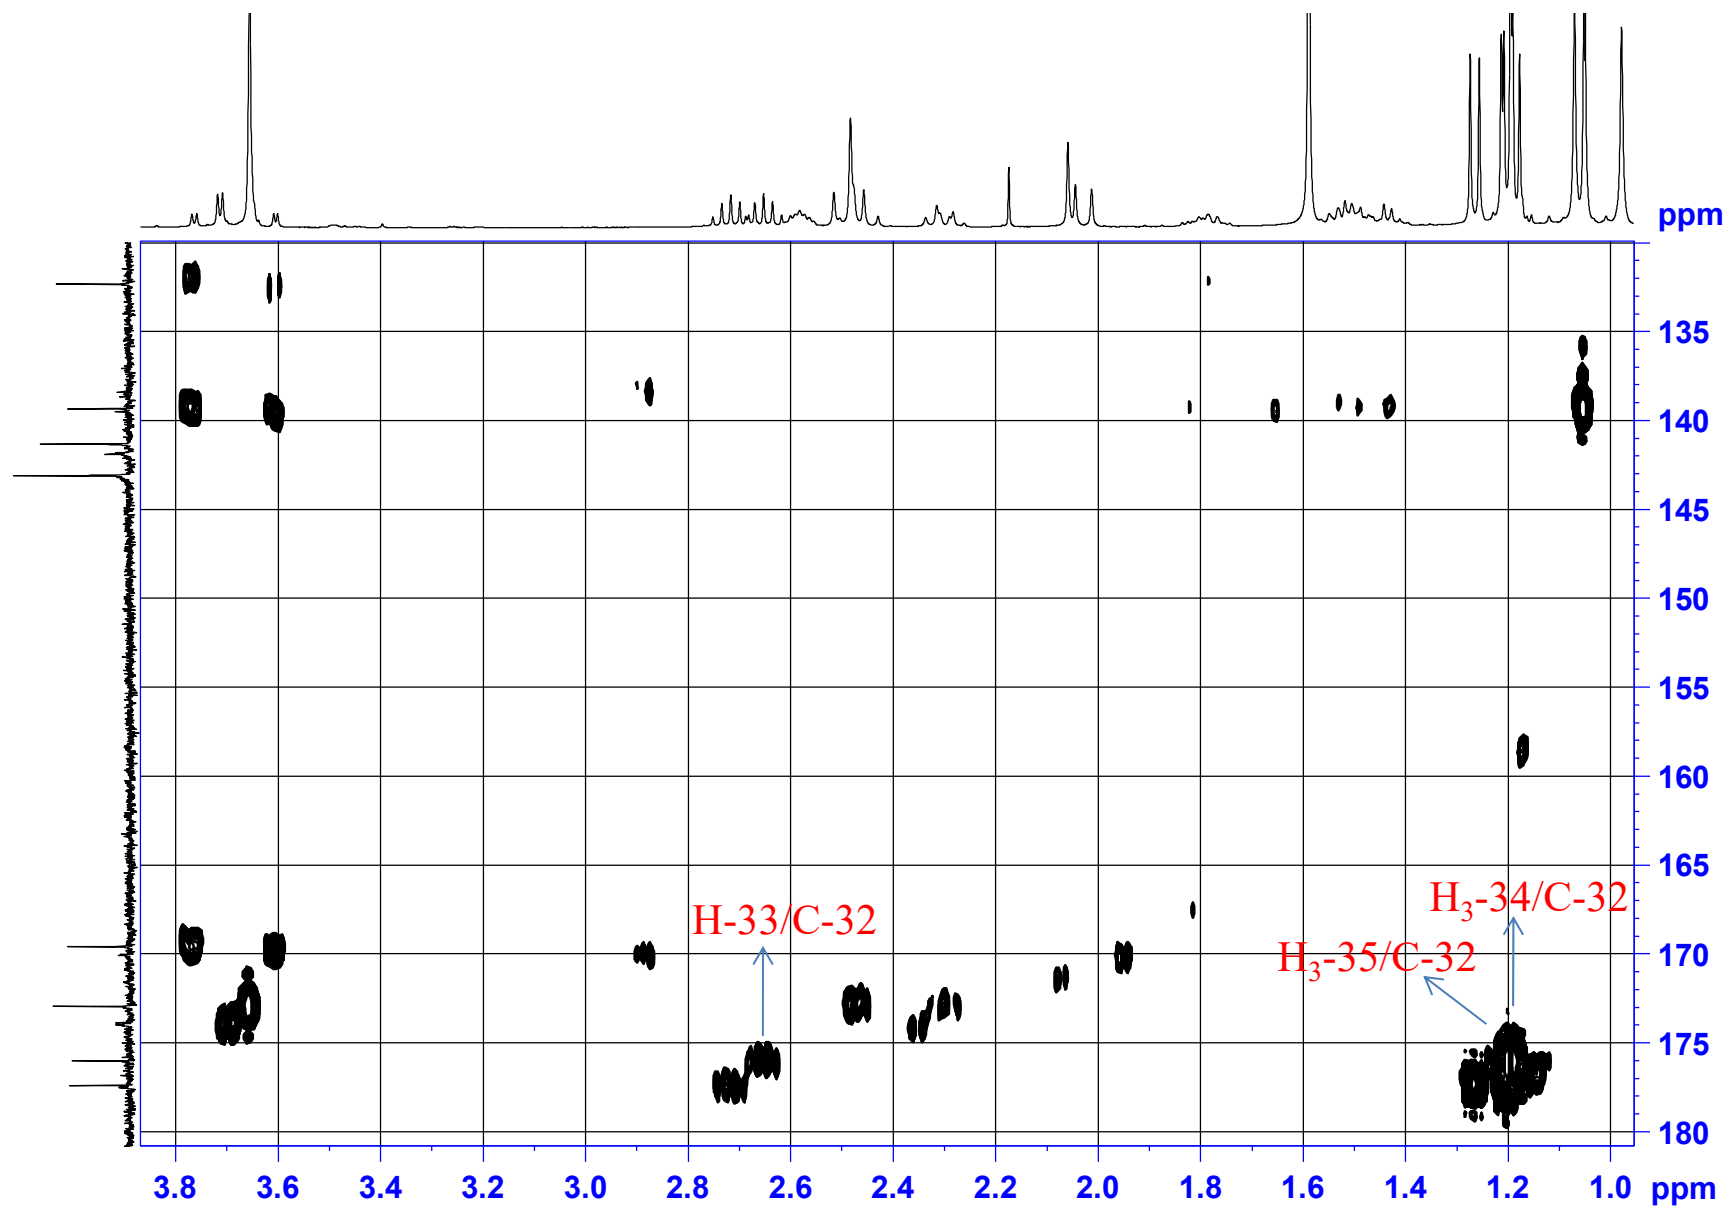

# HMBC spectrum of Krishnolide D (4) in CDCl<sub>3</sub>

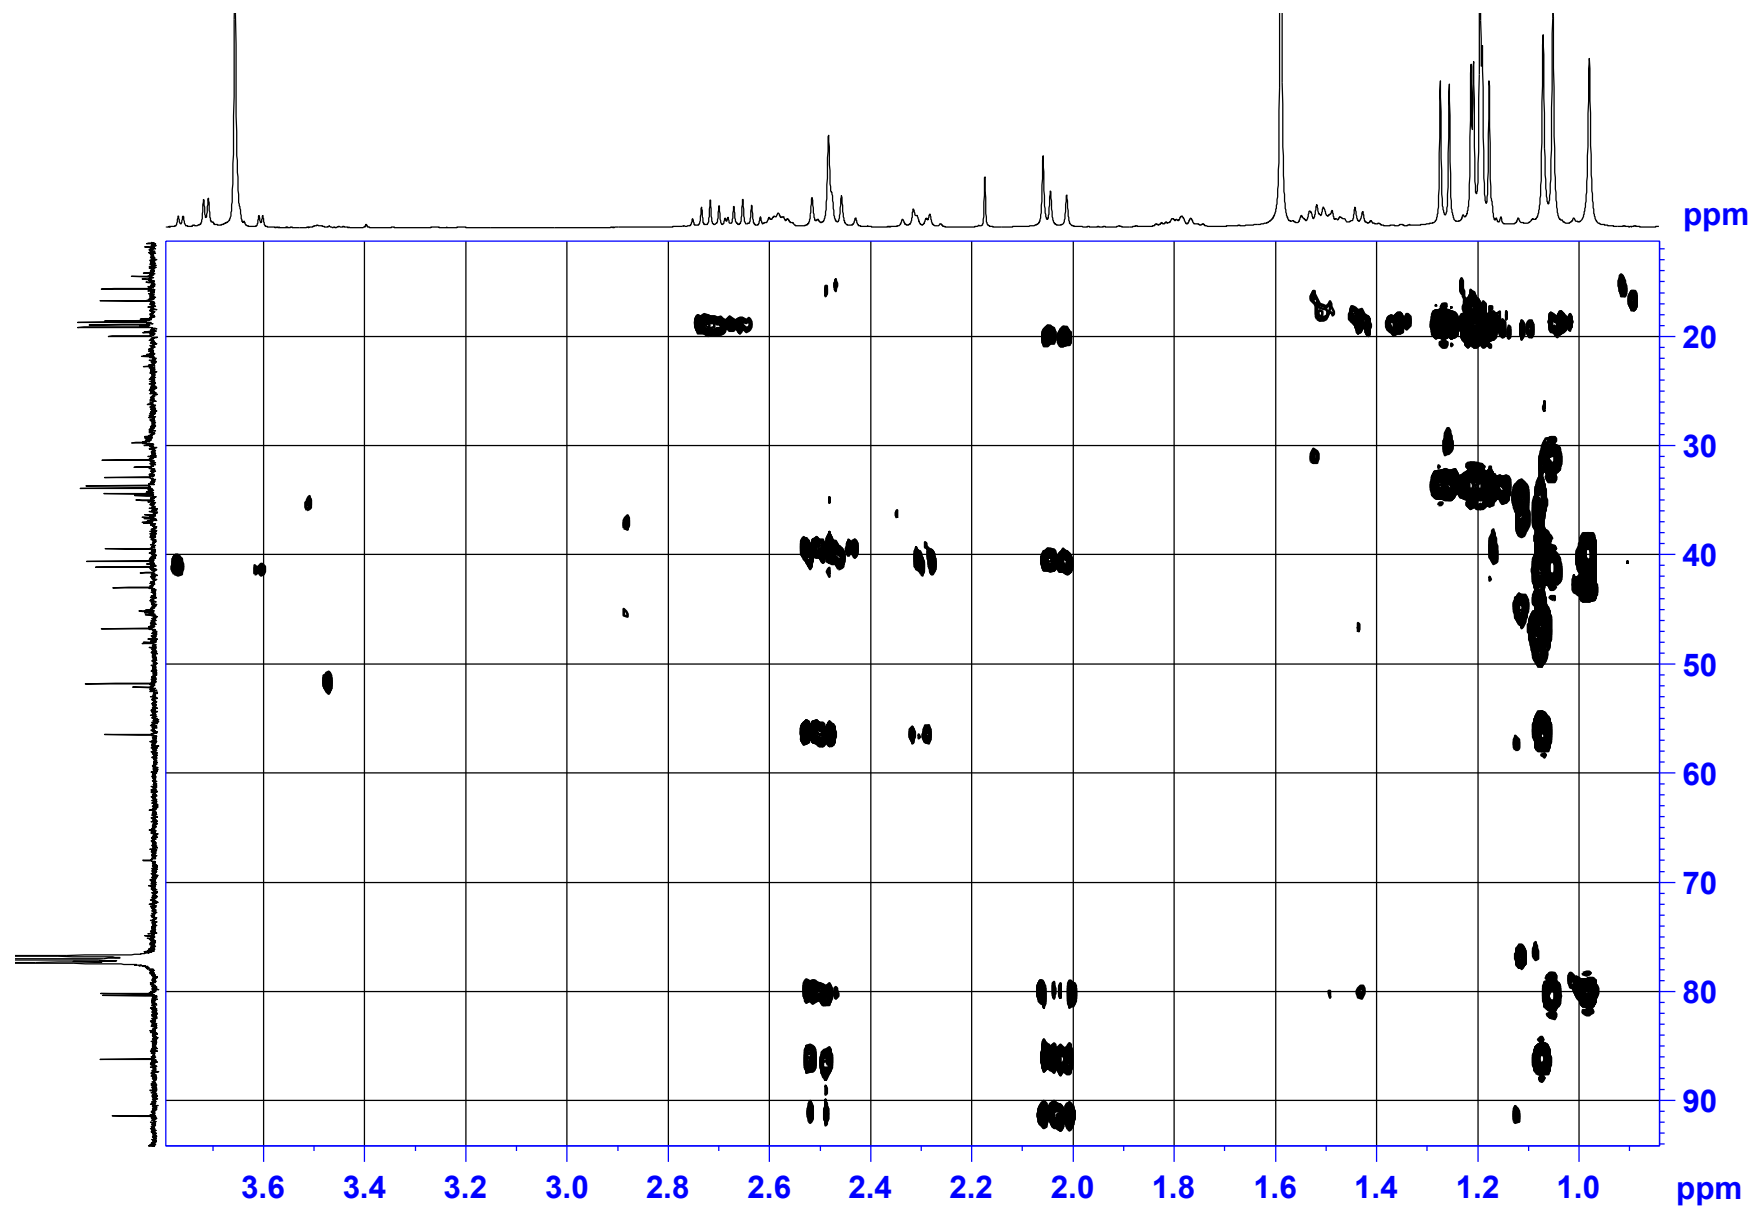

# HMBC spectrum of Krishnolide D (4) in CDCl<sub>3</sub>

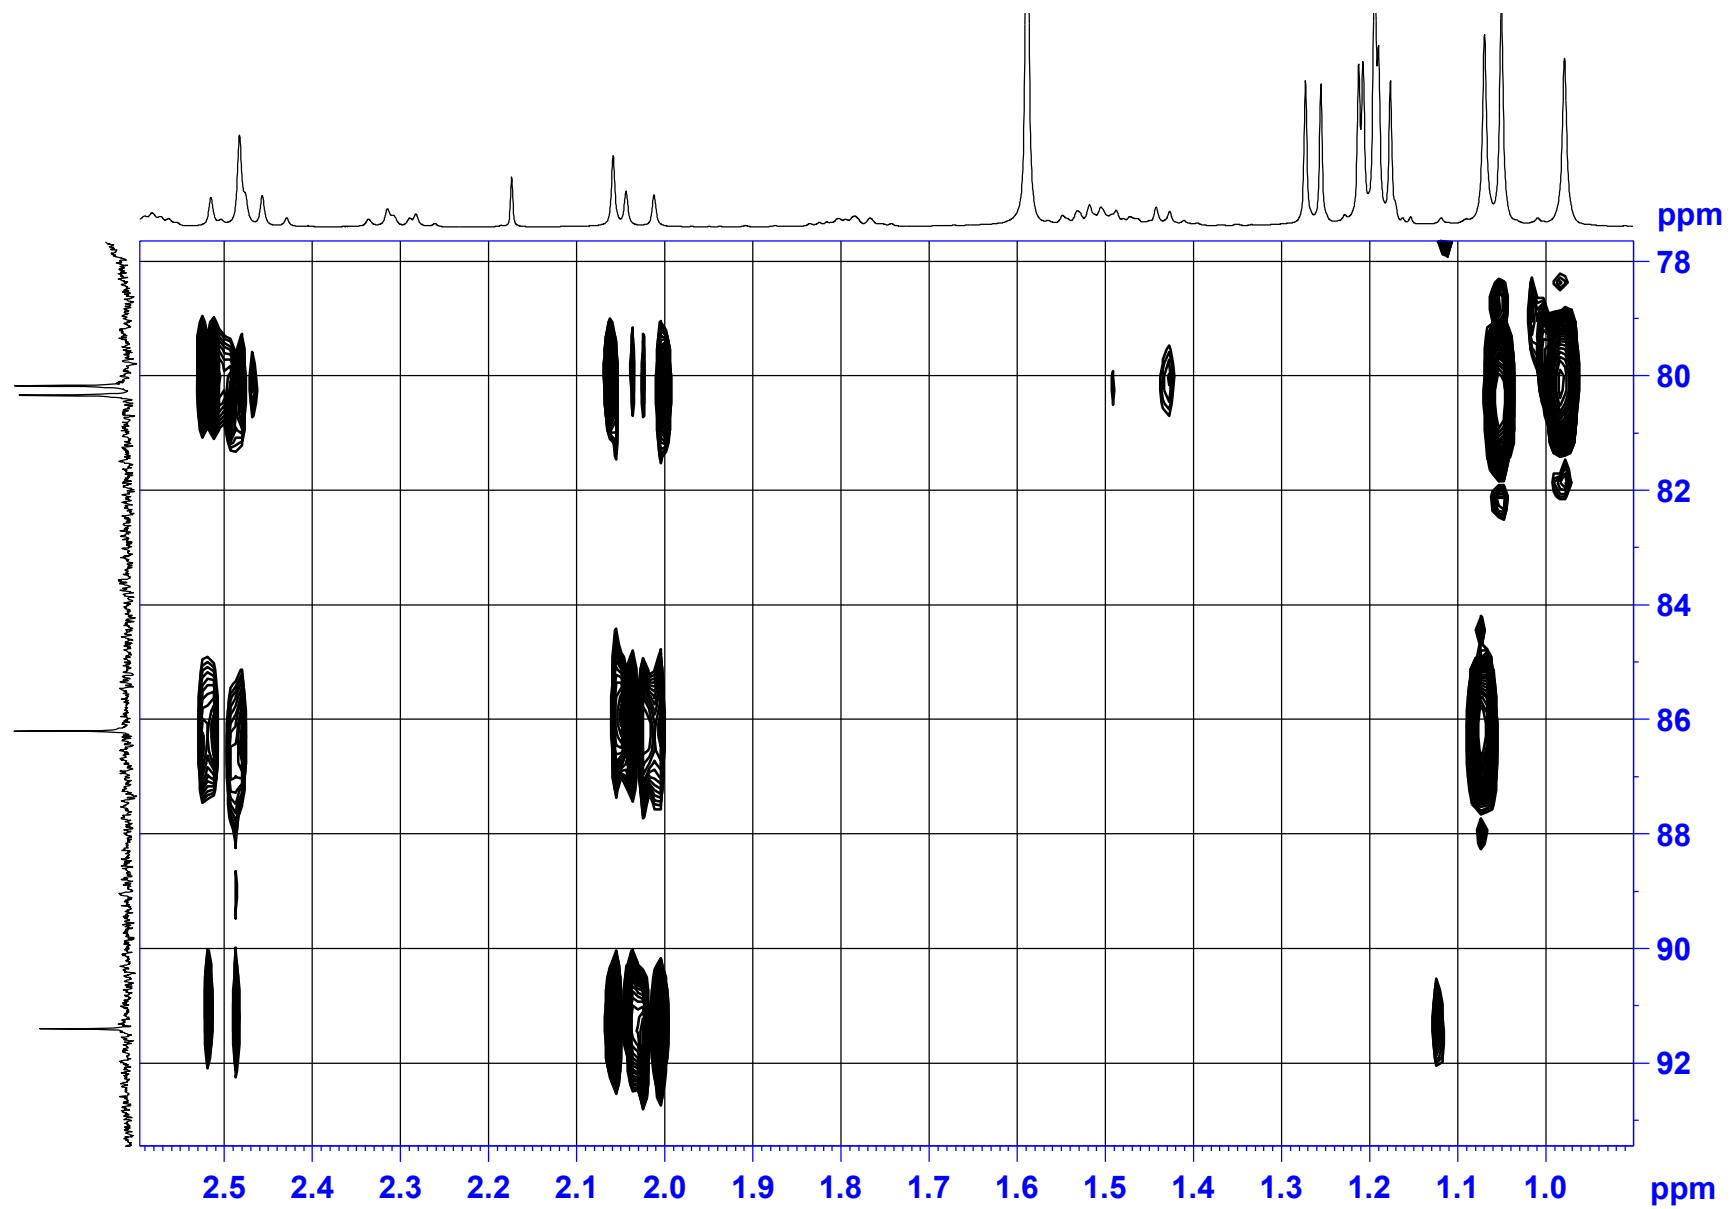

# HMBC spectrum of Krishnolide D (4) in CDCl<sub>3</sub>

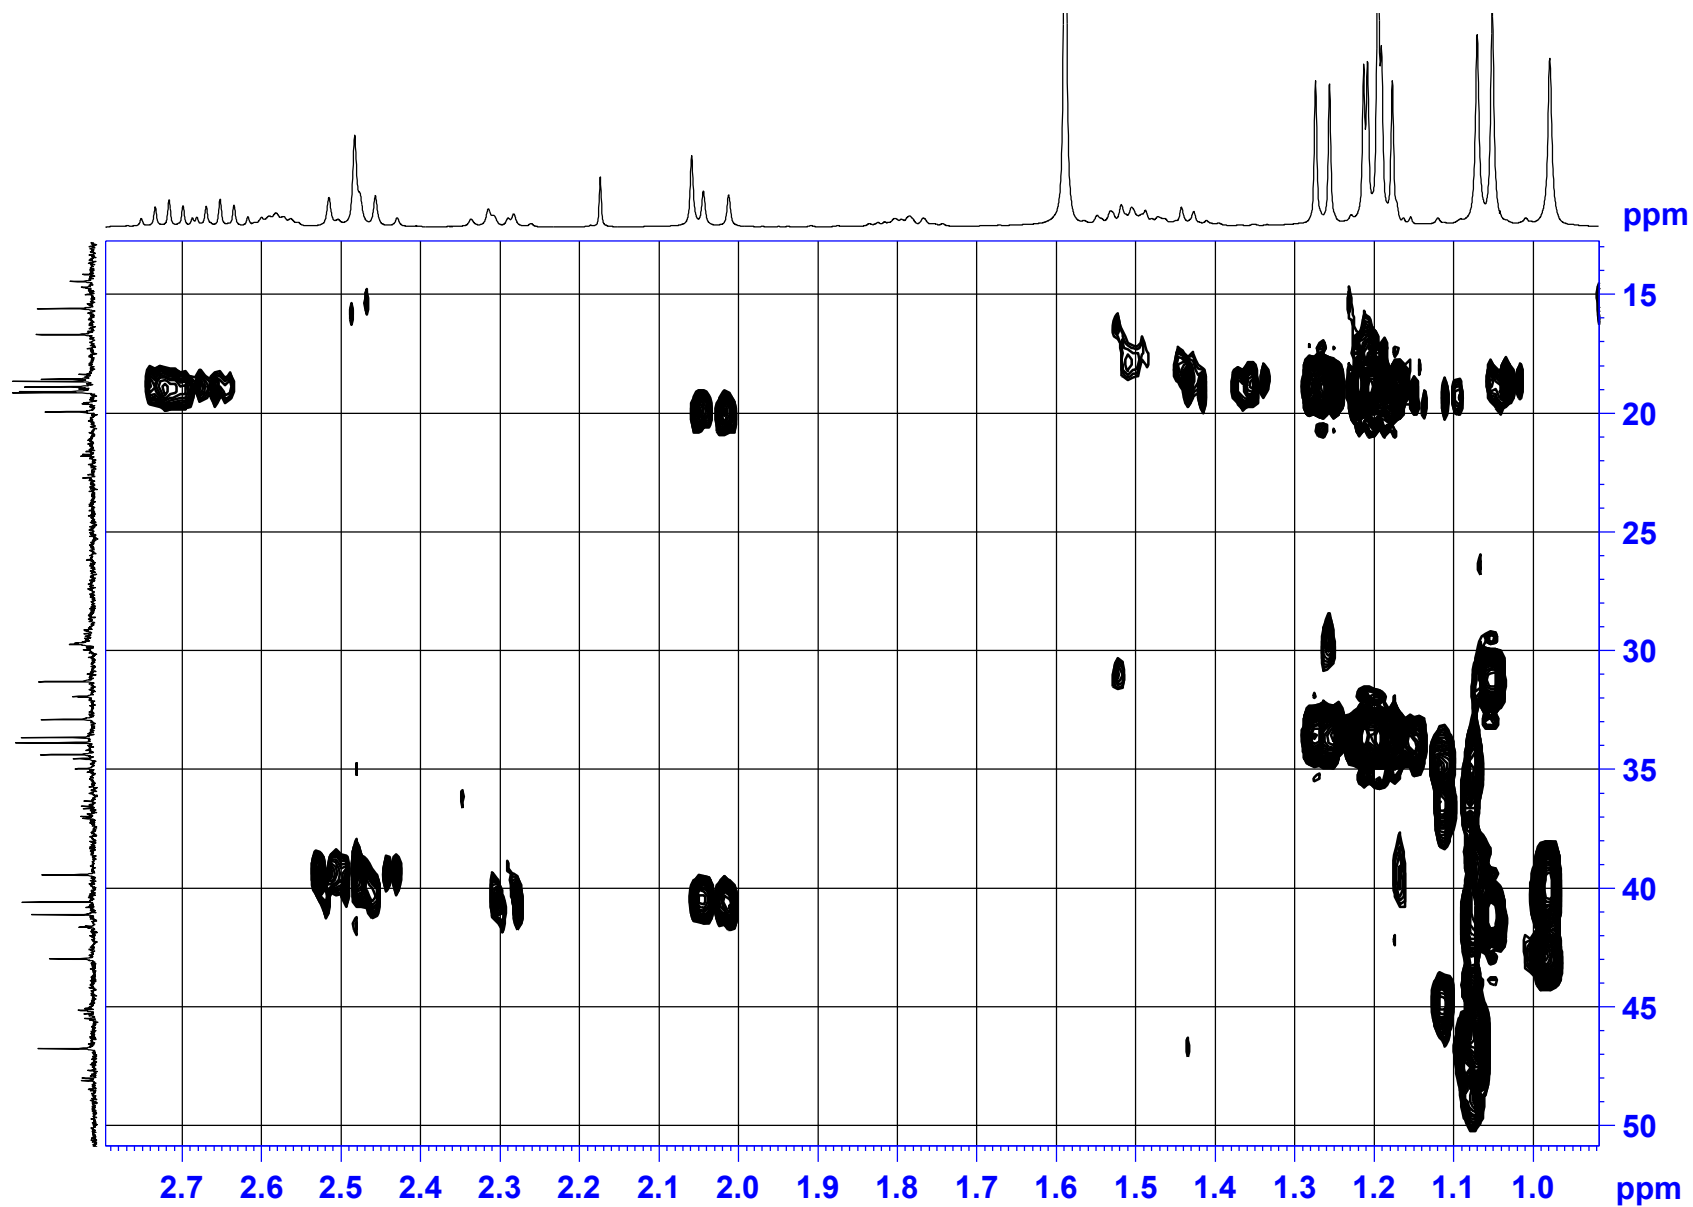

# HMBC spectrum of Krishnolide D (4) in CDCl<sub>3</sub>

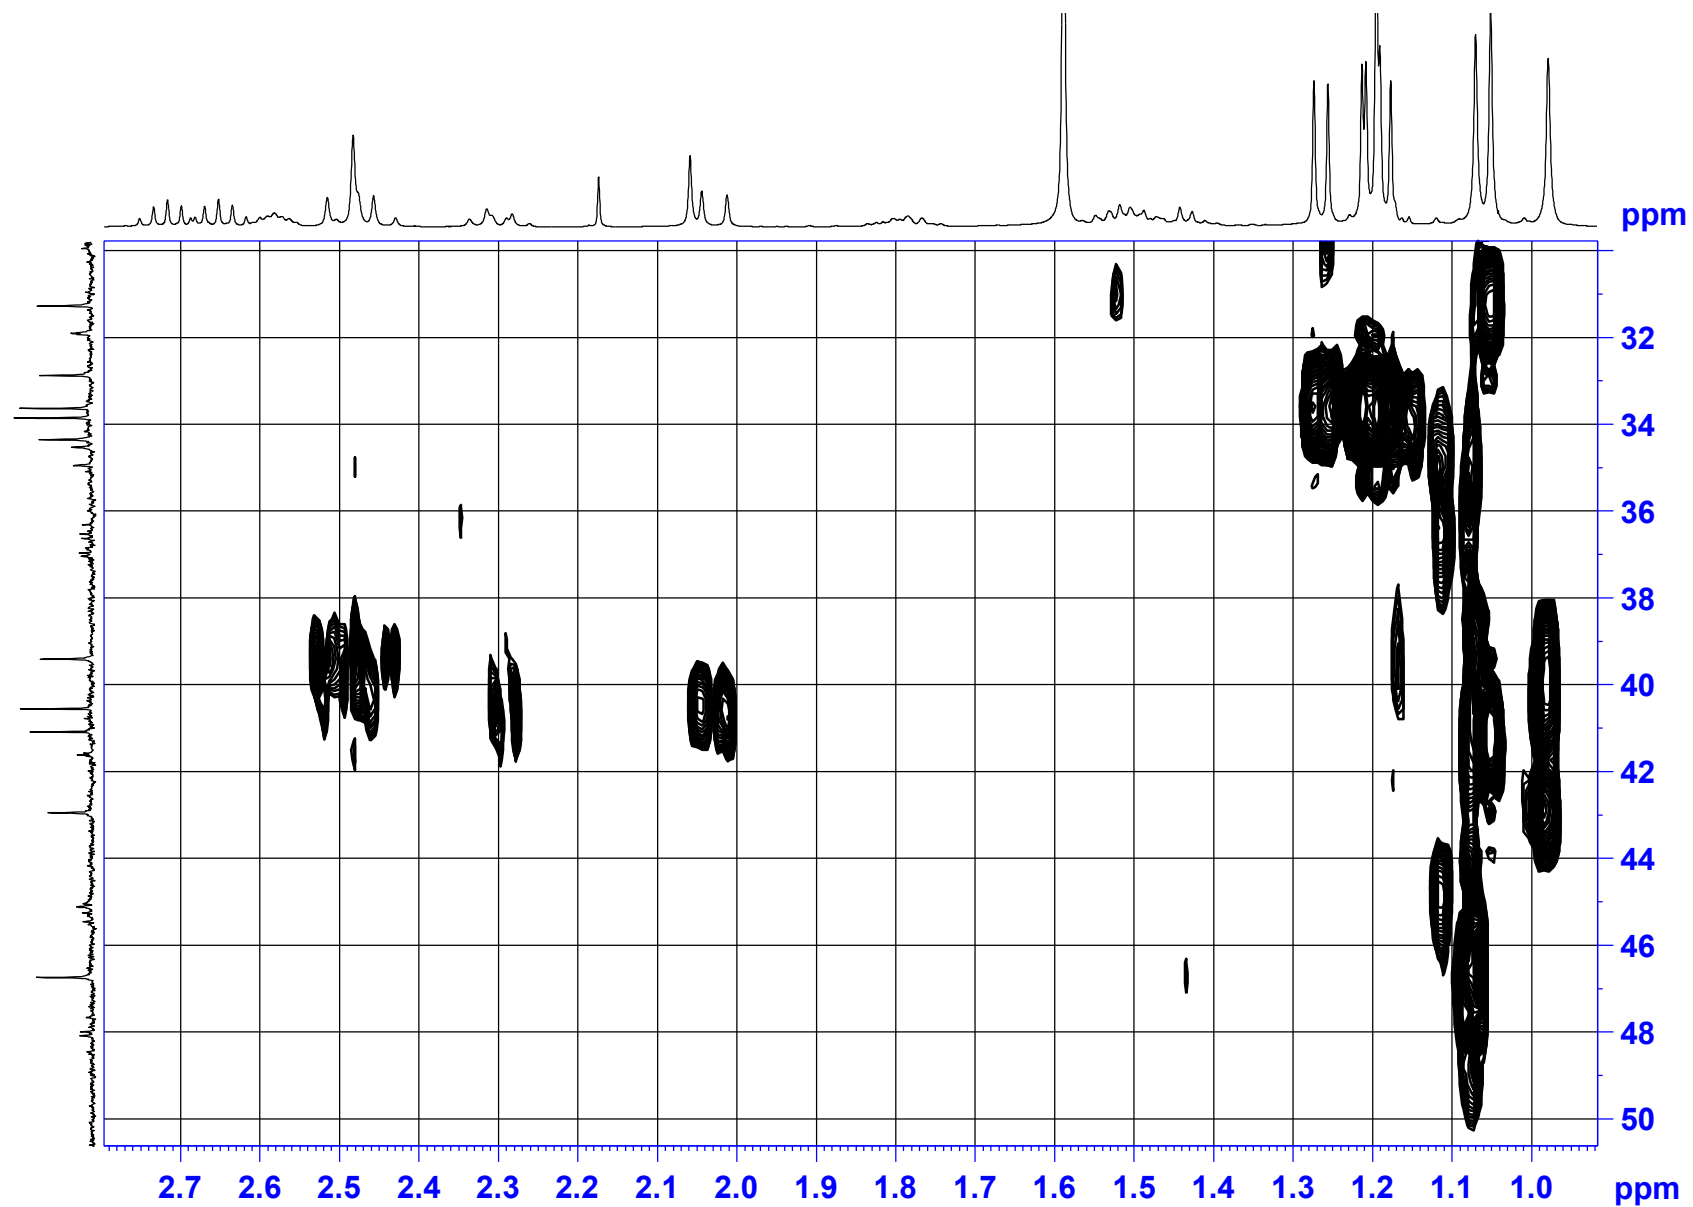

# HMBC spectrum of Krishnolide D (4) in CDCl<sub>3</sub>

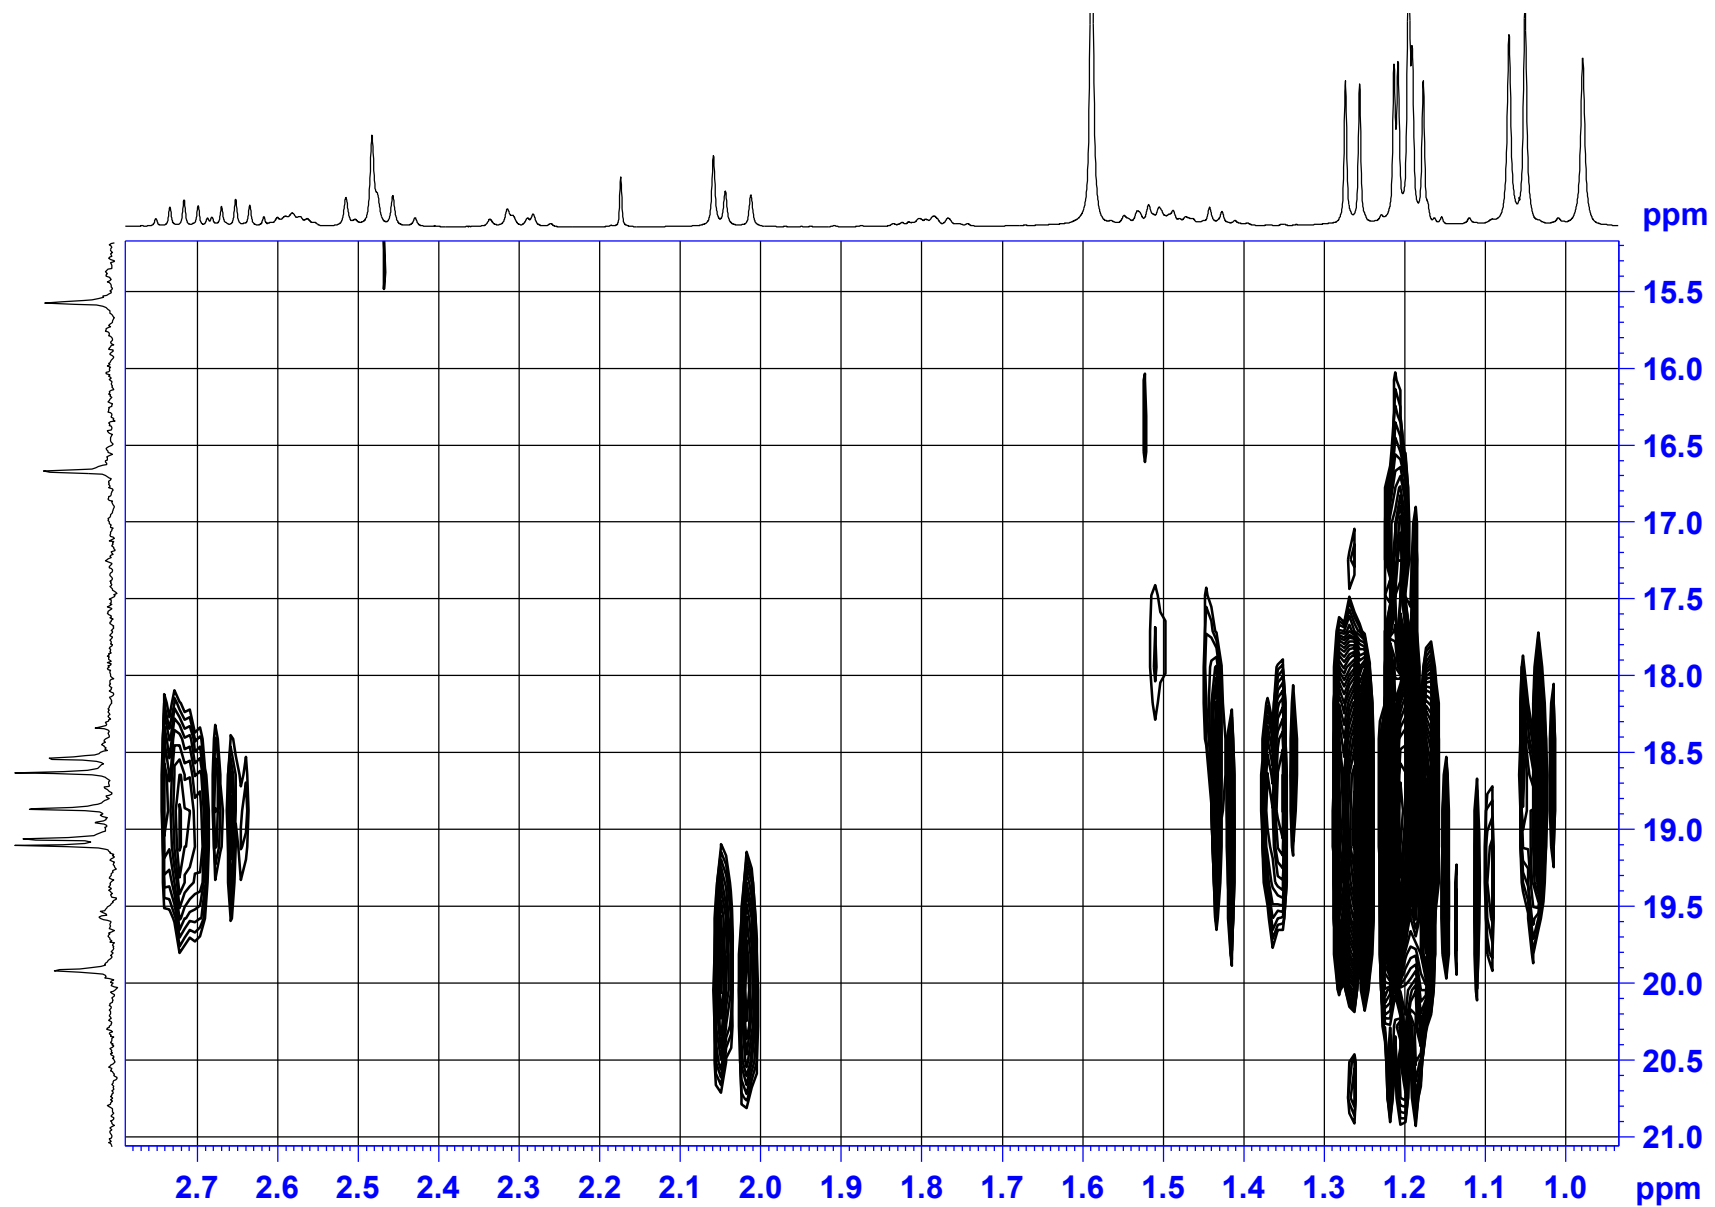

# NOESY spectrum of Krishnolide D (4) in CDCl<sub>3</sub>

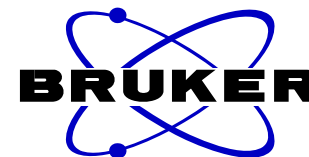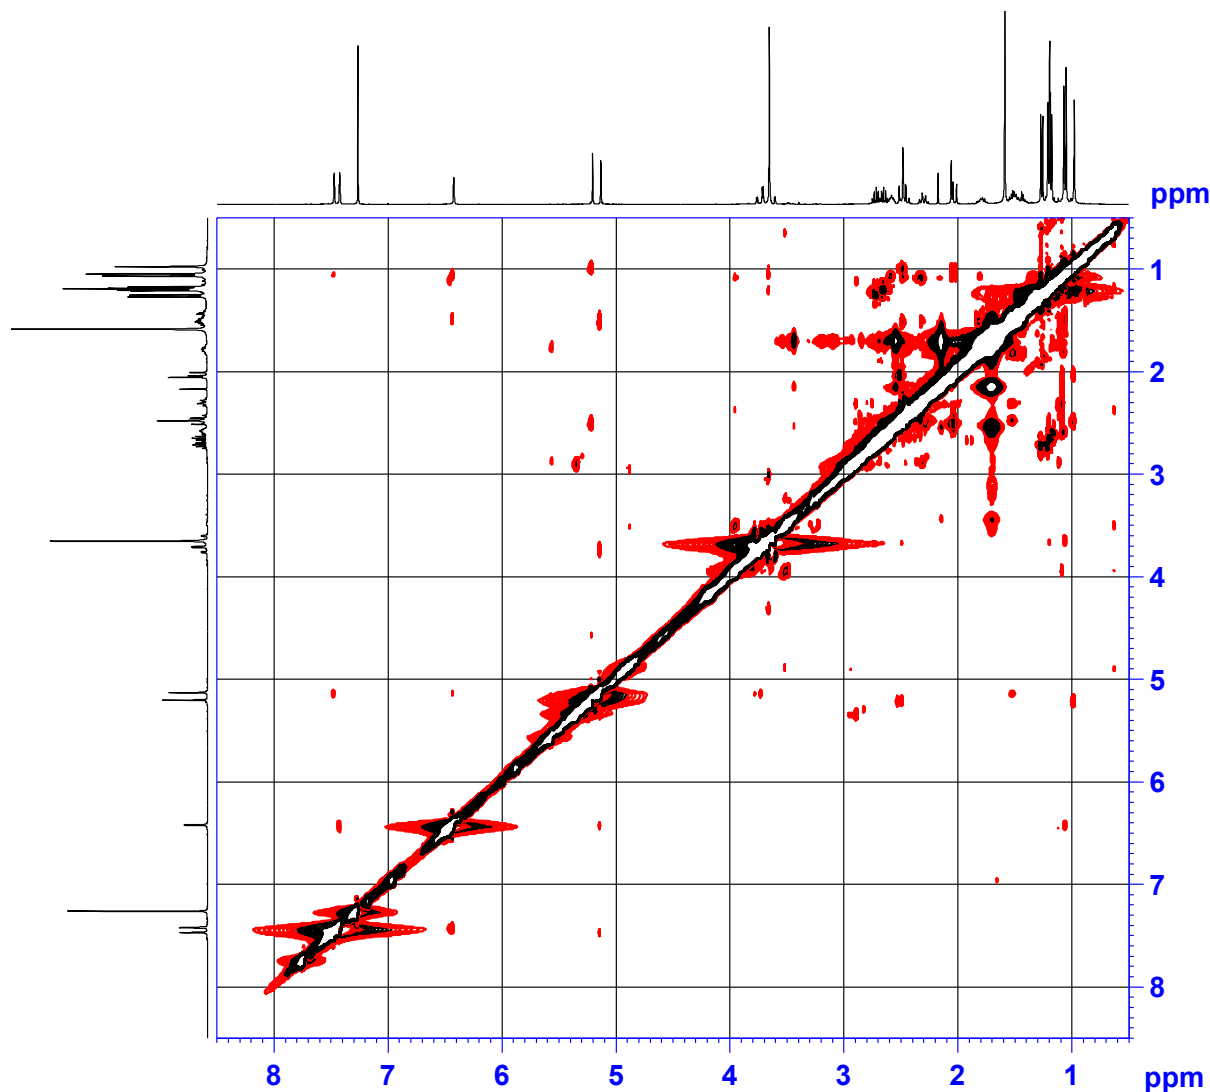

```

NAME          ZQ-24-1
EXPNO         7
PROCNO        1
Date_         20170401
Time          13.17
INSTRUM       spect
PROBHD        5 mm CPPBBO BB
PULPROG       noesygpphpp
TD            2048
SOLVENT       CDCl3
NS            16
DS            32
SWH           4000.000 Hz
FIDRES        1.953125 Hz
AQ            0.2560500 sec
RG            208.5
DW            125.000 usec
DE            10.00 usec
TE            297.0 K
D0            0.00011036 sec
D1            1.99385595 sec
D8            0.30000001 sec
D11           0.03000000 sec
D12           0.00002000 sec
D16           0.00020000 sec
IN0           0.00025000 sec
    
```

```

===== CHANNEL f1 =====
SFO1          400.1318006 MHz
NUC1          1H
P1            11.50 usec
P2            23.00 usec
P17           2500.00 usec
ND0           1
TD            256
SFO1          400.1318 MHz
FIDRES        15.625000 Hz
SW            9.997 ppm
FrnMODE       States-TPPI
SI            1024
SF            400.1300050 MHz
WDW           QSINE
SSB           2
LB            0.00 Hz
GB            0
PC            1.00
SI            1024
MC2           States-TPPI
SF            400.1300050 MHz
WDW           QSINE
SSB           2
LB            0.00 Hz
GB            0
    
```



NOESY spectrum of Krishnolide D (4) in CDCl<sub>3</sub>

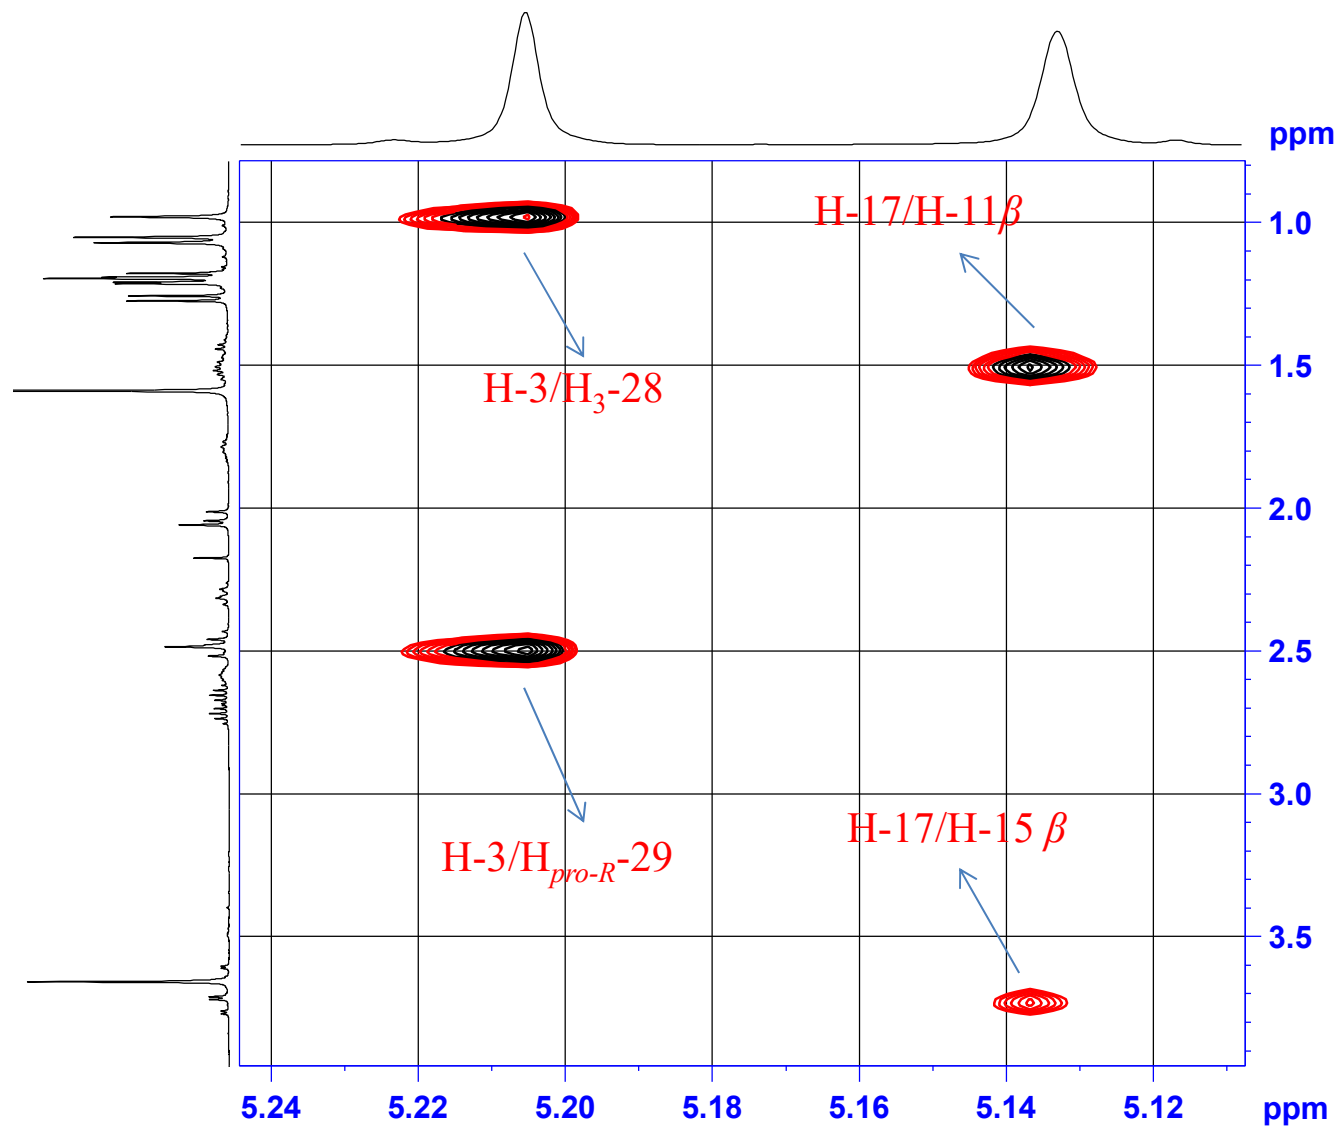

NOESY spectrum of Krishnolide D (4) in CDCl<sub>3</sub>

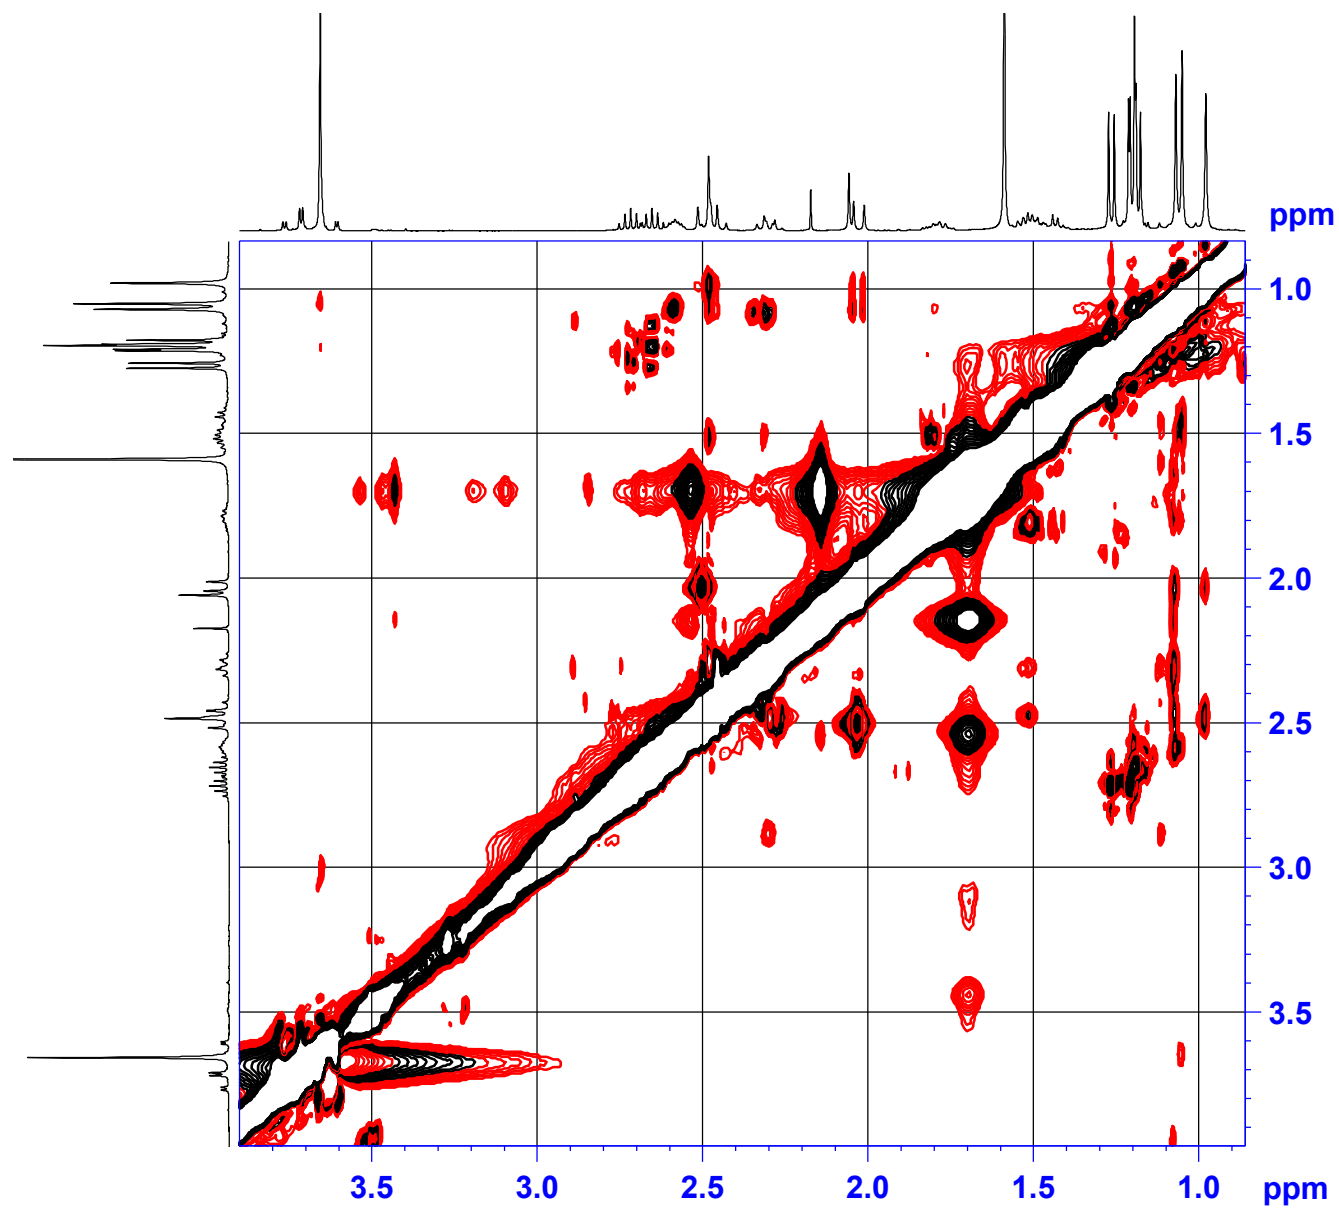

NOESY spectrum of Krishnolide D (4) in CDCl<sub>3</sub>

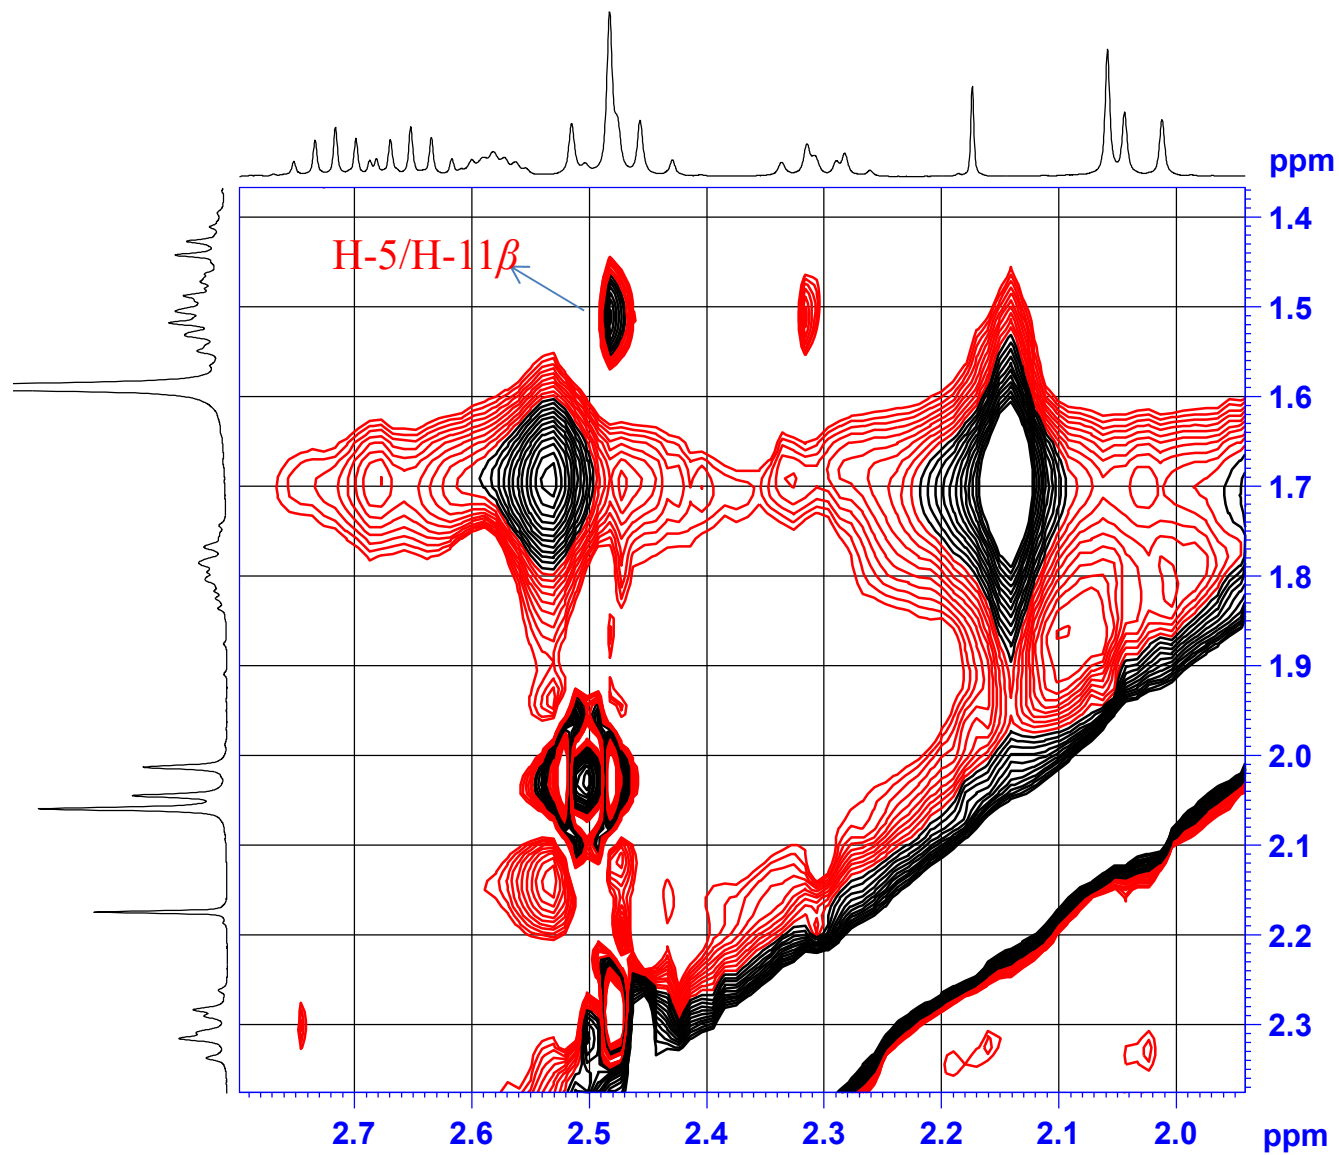

NOESY spectrum of Krishnolide D (4) in CDCl<sub>3</sub>

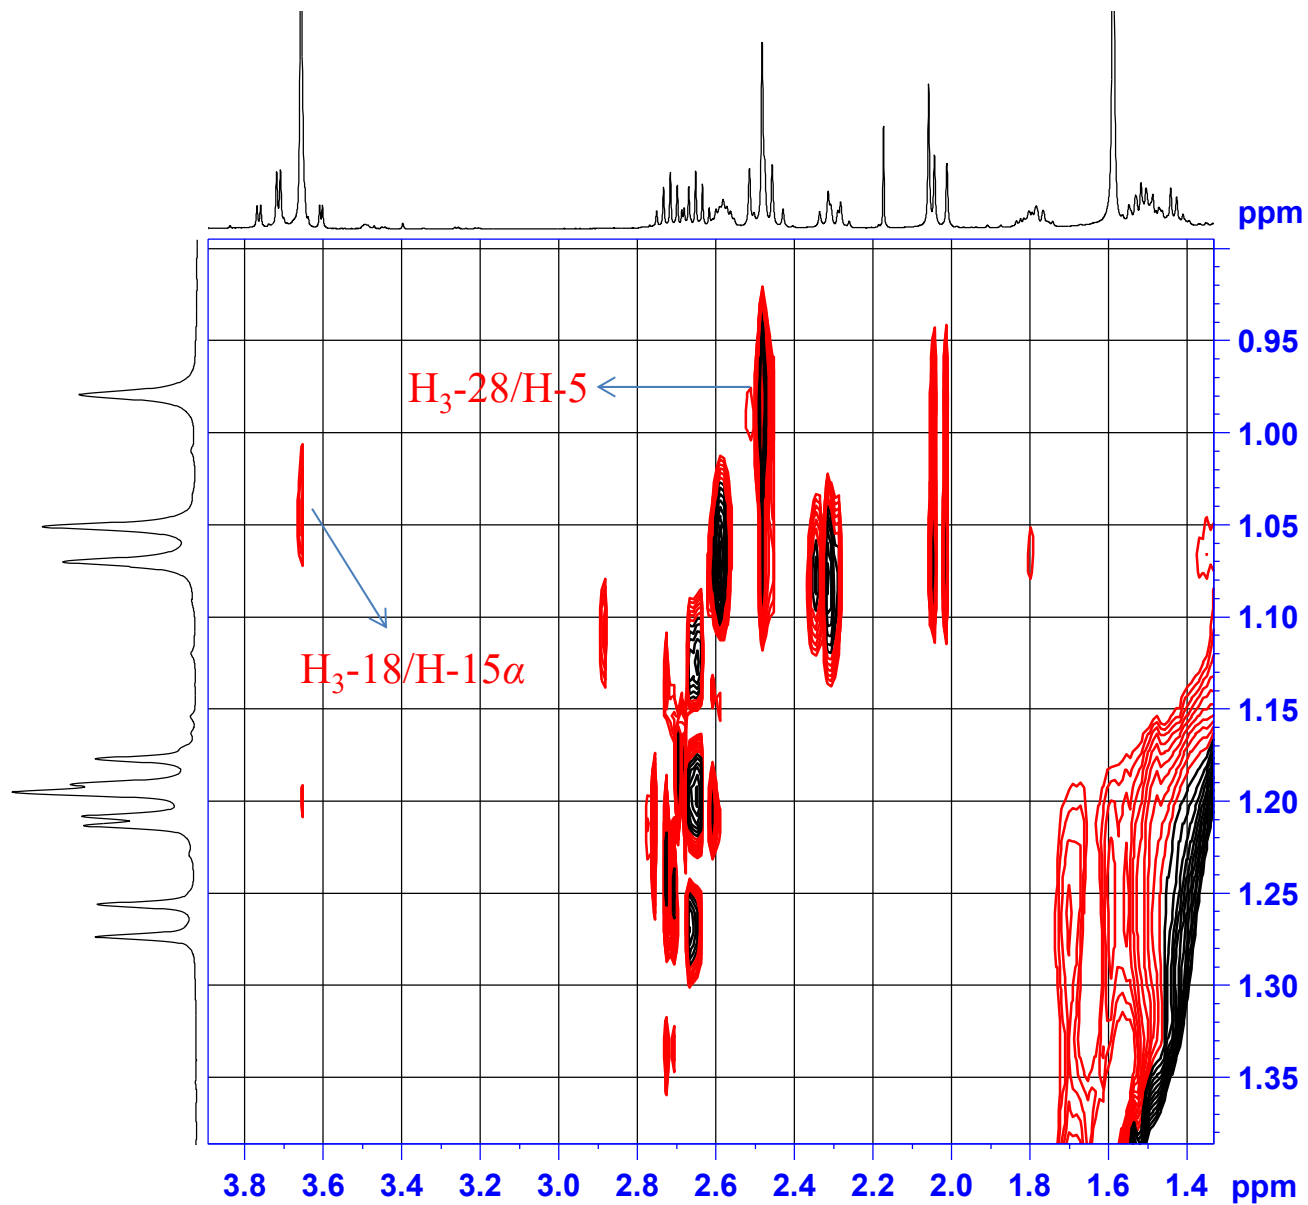

NOESY spectrum of Krishnolide D (4) in CDCl<sub>3</sub>

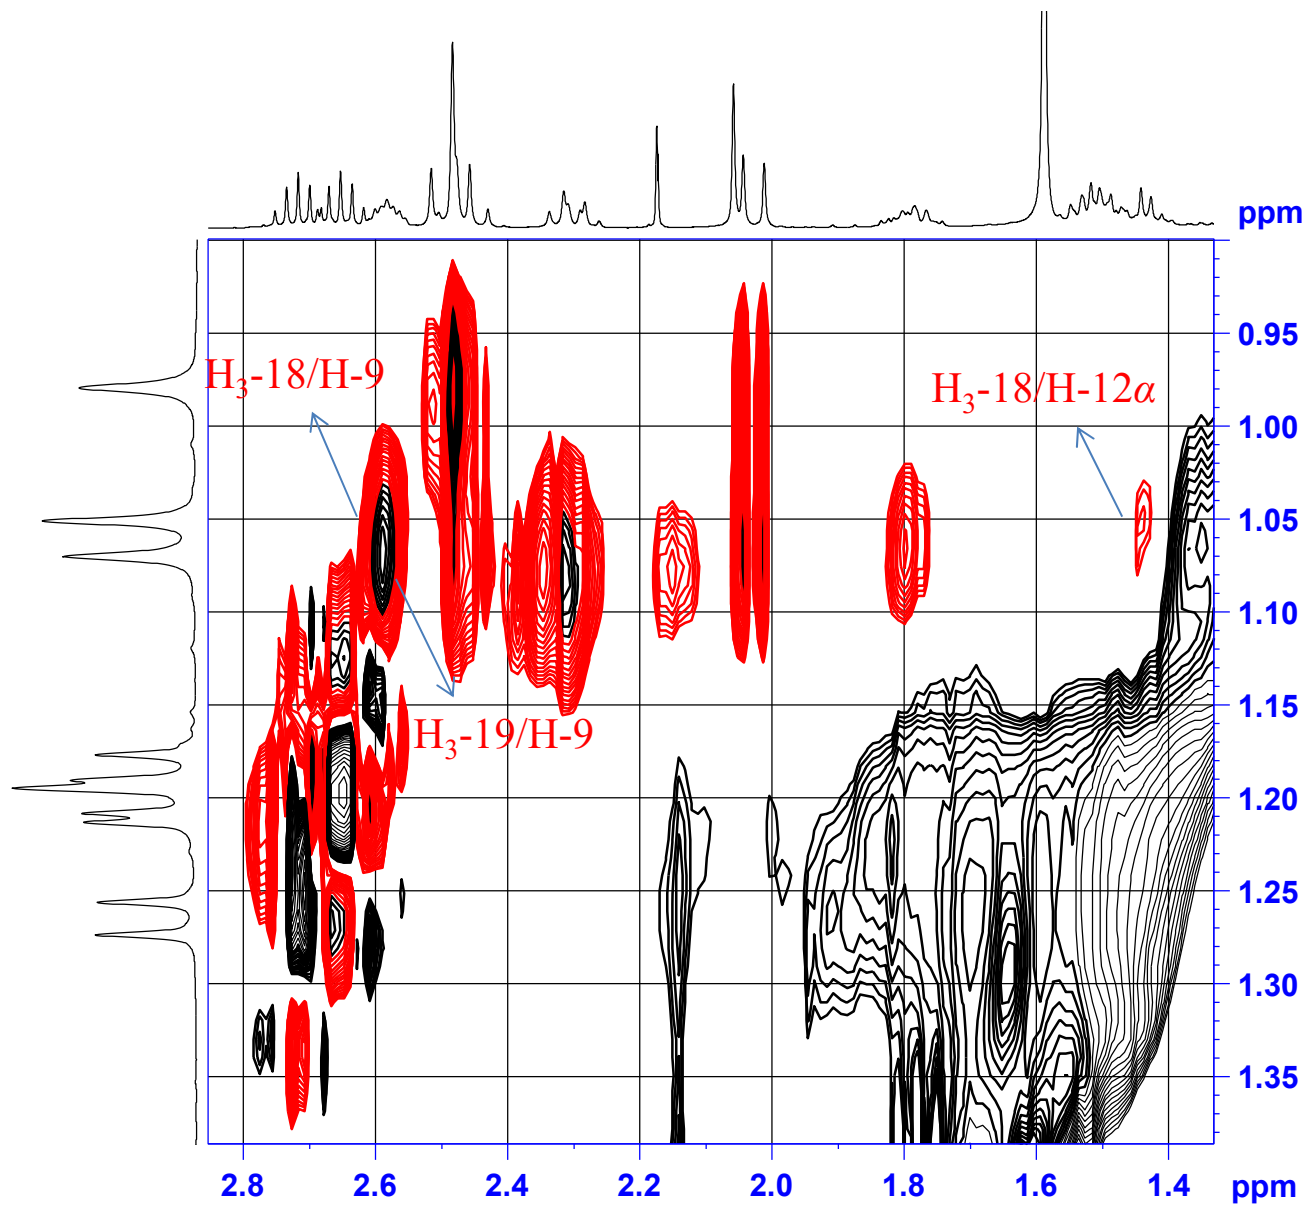

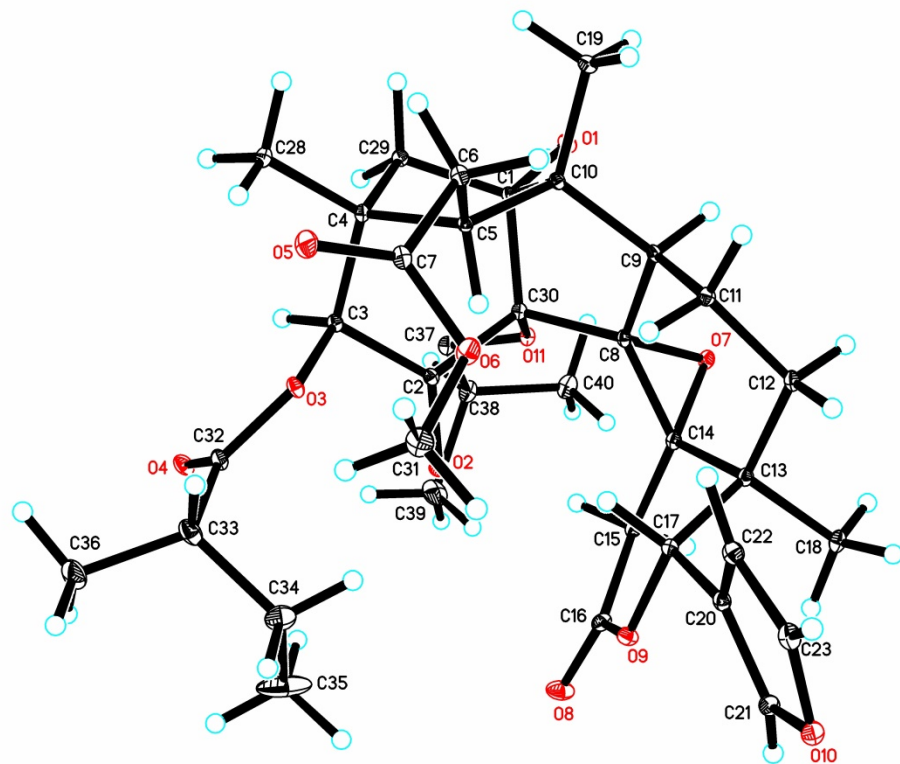

**Figure S1.** ORTEP illustration of the X-ray structure of Krishnolide A (**1**) . Ellipsoids are given at the 30% probability level.
